# Supplementary material for: Full-Length Transcriptome Sequencing Reveals the Molecular Mechanism of Metasequoia glyptostroboides Seed Responding to Aging
Source: Antioxidants (Basel). 2023 Jun 27;12(7):1353. doi: 10.3390/antiox12071353 (PMC10376015; doi:10.3390/antiox12071353)
Supplement: Supplementary file 1 [file antioxidants-12-01353-s001.zip › Supplementary Table.xlsx]

## Sheet: Table S1
Table S1 | Primers used for quantitative real-time RT-PCR analysis
Gene name	Forward (5’-3’)	Reverse (5’-3’)
RBOH	TCCGCTCACCGCAACGAACT	CAAATGGAGGCAGAACTATG
HSP70	TTTTCCCCCATACCCTCTCG	ATCCTGCACGTGTTGGTGAT
CAT	TGACCCCATCGTTGCCATCT	AATGTTGGGCAGGTTGAGCG
CML	CGTCGGGTGCTTGAAGGCGG	TAGGCTTGCCACAGAGACCG
PP2C	GGACGCCAAGAACAAAAACG	CTCGGCTGTTGTCCATAGGG
Bip	ACCTACCAATAGCGCGGATG	AACTAACCCTTCTGGCGAGC
actin	CTAAGGCTAATCGTGAGAA	CTAAGGCTAATCGTGAGAA

## Sheet: Table S2
Table S2 | Summary of reads from third-generation long-read sequencing.
Subreads base (G)	32.18
Subreads number	11487282
Average subreads length	2802
N50(subreads)	3108
CCS	330124
Number of 5′ primer reads	309819
Number of 3′ primer reads	309759
Number of poly-A reads	375101
Number of non-full-length reads	34773
Number of full-length reads	295351
Number of full-length non-chimeric reads	289659
Average length of Flnc reads (bp)	3048
Number of consensus reads	77558
Average length of consensus reads (bp)	2799
Total nucleotides (bp) before and after correction	217011161/217281041
Mean length before and after correction (bp)	2799/2802
Minimum length before and after correction (bp)	68/68
Maximum length before and after correction (bp)	14493/14555
N50 length before and after correction (bp)	3109/3114
Number of unigenes	42189
Average length of unigenes	2814

## Sheet: Table S3
Table S3 | all unigene functional annotation.
Gene_id	{nr}	{SwissProt}	{KEGG}	{KOG}	{GO}	{nt}	{pfam}
transcript_HQ_AA_transcript0/f2p0/9531	{AAM28917.1; putative TIR/NBS/LRR disease resistance protein, partial [Pinus taeda]}	{sp|Q40392|TMVRN_NICGU; TMV resistance protein N OS=Nicotiana glutinosa GN=N PE=1 SV=1}	{nnu:104593581; - - - - -}	{NA}	{GO:0005525; GTP binding; molecular_function GO:0016887; ATPase activity; molecular_function GO:0005524; ATP binding; molecular_function GO:0043531; ADP binding; molecular_function GO:0007264; small GTPase mediated signal transduction; biological_process GO:0003924; GTPase activity; molecular_function GO:0007165; signal transduction; biological_process GO:0005515; protein binding; molecular_funct…	{NA}	{PF00004:ATPase family associated with various cellular activities (AAA) PF00005:ABC transporter PF03193:Protein of unknown function, DUF258 PF13676:TIR domain PF08477:Ras of Complex, Roc, domain of DAPkinase PF01582:TIR domain PF01637:ATPase domain predominantly from Archaea PF00931:NB-ARC domain}
transcript_HQ_AA_transcript1/f2p0/8987	{ERN08403.1; hypothetical protein AMTR_s00148p00090060 [Amborella trichopoda]}	{sp|F4KBP5|CHR4_ARATH; Protein CHROMATIN REMODELING 4 OS=Arabidopsis thaliana GN=CHR4 PE=2 SV=1}	{atr:18995828; - - - - -}	{At5g44800; KOG0383 Predicted helicase R General function prediction only ;}	{GO:0005515; protein binding; molecular_function GO:0008270; zinc ion binding; molecular_function GO:0005524; ATP binding; molecular_function}	{XM_016579356.1; PREDICTED: Nicotiana tabacum probable ATP-dependent DNA helicase CHR12 (LOC107761173), partial mRNA}	{PF12678:RING-H2 zinc finger domain PF00628:PHD-finger PF00176:SNF2 family N-terminal domain}
transcript_HQ_AA_transcript100/f2p0/7523	{JAT40491.1; Zinc finger C3H1 domain-containing protein, partial [Anthurium amnicola]}	{sp|O60293|ZC3H1_HUMAN; Zinc finger C3H1 domain-containing protein OS=Homo sapiens GN=ZFC3H1 PE=1 SV=3}	{nnu:104599318; - - - - -}	{At2g39580; KOG4839 Uncharacterized conserved protein S Function unknown ;}	{NA}	{NA}	{NA}
transcript_HQ_AA_transcript10002/f8p0/3366	{GAQ90706.1; hypothetical protein KFL_006760045 [Klebsormidium flaccidum]}	{sp|A0A0D2YG01|FUB8_FUSO4; Non-canonical non-ribosomal peptide synthetase FUB8 OS=Fusarium oxysporum f. sp. lycopersici (strain 4287 / CBS 123668 / FGSC 9935 / NRRL 34936) GN=FUB8 PE=1 SV=1}	{ota:Ot18g00670; - - - - -}	{Hs22061203; KOG1221 Acyl-CoA reductase I Lipid transport and metabolism ;}	{GO:0003824; NA GO:0050662; coenzyme binding; molecular_function GO:0008152; NA}	{NA}	{PF00501:AMP-binding enzyme PF01370:NAD dependent epimerase/dehydratase family}
transcript_HQ_AA_transcript10007/f2p0/3367	{XP_010256094.1; PREDICTED: protein MARD1 [Nelumbo nucifera]}	{sp|Q8LGS1|MARD1_ARATH; Protein MARD1 OS=Arabidopsis thaliana GN=MARD1 PE=2 SV=2}	{nnu:104596562; - - - - -}	{NA}	{NA}	{BT105495.1; Picea glauca clone GQ02823_F17 mRNA sequence}	{NA}
transcript_HQ_AA_transcript10008/f4p0/3415	{ERN11213.1; hypothetical protein AMTR_s00024p00219730 [Amborella trichopoda]}	{sp|B9DFV2|PQT3L_ARATH; E3 ubiquitin ligase PQT3-like OS=Arabidopsis thaliana GN=At5g47430 PE=1 SV=1}	{atr:18439404; K10624 RBBP6 E3 ubiquitin-protein ligase RBBP6 2.3.2.27 -}	{7291741_1; KOG0314 Predicted E3 ubiquitin ligase O Posttranslational modification, protein turnover, chaperones ;}	{GO:0004842; ubiquitin-protein ligase activity; molecular_function GO:0003676; nucleic acid binding; molecular_function GO:0016567; protein ubiquitination; biological_process GO:0008270; zinc ion binding; molecular_function GO:0005515; protein binding; molecular_function GO:0046872; metal ion binding; molecular_function GO:0005634; nucleus; cellular_component}	{NA}	{PF12678:RING-H2 zinc finger domain PF14634:zinc-RING finger domain PF04564:U-box domain PF13639:Ring finger domain PF00097:Zinc finger, C3HC4 type (RING finger) PF00098:Zinc knuckle PF08783:DWNN domain}
transcript_HQ_AA_transcript10009/f2p0/3420	{ERN05330.1; hypothetical protein AMTR_s00007p00179040 [Amborella trichopoda]}	{sp|P25848|PHY1_CERPU; Light-sensor Protein kinase OS=Ceratodon purpureus GN=PHY1 PE=3 SV=3}	{egu:105039592; - - - - -}	{At1g01450; KOG0192 Tyrosine kinase specific for activated (GTP-bound) p21cdc42Hs T Signal transduction mechanisms ;}	{GO:0006468; protein phosphorylation; biological_process GO:0004672; protein kinase activity; molecular_function GO:0005524; ATP binding; molecular_function}	{NA}	{PF00069:Protein kinase domain PF07714:Protein tyrosine kinase}
transcript_HQ_AA_transcript10012/f5p0/3373	{XP_011077071.1; PREDICTED: uncharacterized protein LOC105161164 [Sesamum indicum]}	{sp|Q0WMY5|PP365_ARATH; Pentatricopeptide repeat-containing protein At5g04810, chloroplastic OS=Arabidopsis thaliana GN=PPR4 PE=1 SV=1}	{sind:105161164; - - - - -}	{NA}	{NA}	{NA}	{NA}
transcript_HQ_AA_transcript10020/f2p0/3398	{CDP06731.1; unnamed protein product [Coffea canephora]}	{sp|Q9HGM9|DNJC7_SCHPO; DnaJ homolog subfamily C member 7 homolog OS=Schizosaccharomyces pombe (strain 972 / ATCC 24843) GN=SPBC543.02c PE=4 SV=1}	{csl:COCSUDRAFT_60436; K09527 DNAJC7 DnaJ homolog subfamily C member 7 - -}	{SPBC543.02c; KOG0550 Molecular chaperone (DnaJ superfamily) O Posttranslational modification, protein turnover, chaperones ;}	{GO:0043495; protein anchor; molecular_function GO:0033130; acetylcholine receptor binding; molecular_function GO:0046983; protein dimerization activity; molecular_function GO:0005515; protein binding; molecular_function GO:0007268; synaptic transmission; biological_process}	{XM_003567856.3; PREDICTED: Brachypodium distachyon dnaJ homolog subfamily B member 4-like (LOC100824379), mRNA}	{PF13181:Tetratricopeptide repeat PF13176:Tetratricopeptide repeat PF14863:Alkyl sulfatase dimerisation PF13371:Tetratricopeptide repeat PF13414:TPR repeat PF00515:Tetratricopeptide repeat PF13374:Tetratricopeptide repeat PF13174:Tetratricopeptide repeat PF10579:Rapsyn N-terminal myristoylation and linker region}
transcript_HQ_AA_transcript10021/f2p0/3418	{XP_011625991.1; PREDICTED: uncharacterized protein LOC18441477 [Amborella trichopoda]}	{sp|Q6ZJM9|EHD3_ORYSJ; PHD finger protein EHD3 OS=Oryza sativa subsp. japonica GN=EHD3 PE=1 SV=1}	{atr:18441477; - - - - -}	{NA}	{GO:0030123; AP-3 adaptor complex; cellular_component GO:0015031; protein transport; biological_process GO:0005515; protein binding; molecular_function}	{NA}	{PF06375:Bovine leukaemia virus receptor (BLVR) PF00439:Bromodomain PF00628:PHD-finger}
transcript_HQ_AA_transcript10024/f2p0/3381	{XP_010257243.1; PREDICTED: protein DETOXIFICATION 42 [Nelumbo nucifera]}	{sp|Q9SYD6|DTX42_ARATH; Protein DETOXIFICATION 42 OS=Arabidopsis thaliana GN=DTX42 PE=2 SV=2}	{nnu:104597423; - - - - -}	{At3g08040; KOG1347 Uncharacterized membrane protein, predicted efflux pump R General function prediction only ;}	{GO:0006855; drug transmembrane transport; biological_process GO:0015297; antiporter activity; molecular_function GO:0015238; drug transmembrane transporter activity; molecular_function GO:0055085; transmembrane transport; biological_process GO:0016020; membrane; cellular_component}	{BT111242.1; Picea glauca clone GQ03234_L12 mRNA sequence}	{PF01554:MatE}
transcript_HQ_AA_transcript10029/f3p0/3434	{JAT44003.1; putative homeobox protein C32A11.03c, partial [Anthurium amnicola]}	{sp|Q99160|HOY1_YARLI; Homeobox protein HOY1 OS=Yarrowia lipolytica (strain CLIB 122 / E 150) GN=HOY1 PE=3 SV=2}	{NA}	{SPAC32A11.03c; KOG0849 Transcription factor PRD and related proteins, contain PAX and HOX domains K Transcription ;}	{GO:0006355; regulation of transcription, DNA-dependent; biological_process GO:0003677; DNA binding; molecular_function}	{NA}	{PF05920:Homeobox KN domain PF00046:Homeobox domain}
transcript_HQ_AA_transcript1003/f2p0/5737	{XP_017637696.1; PREDICTED: putative phospholipid-transporting ATPase 9 [Gossypium arboreum]}	{sp|Q9UT43|YFRD_SCHPO; Putative phospholipid-transporting ATPase C821.13c OS=Schizosaccharomyces pombe (strain 972 / ATCC 24843) GN=SPAC821.13c PE=1 SV=2}	{gra:105786824; K01530 E3.6.3.1 phospholipid-translocating ATPase 3.6.3.1 -}	{YMR162c; KOG0206 P-type ATPase R General function prediction only ;}	{GO:0000166; nucleotide binding; molecular_function GO:0046872; metal ion binding; molecular_function}	{NA}	{PF00122:E1-E2 ATPase}
transcript_HQ_AA_transcript10031/f2p0/3405	{ACN39879.1; unknown [Picea sitchensis]}	{sp|P93755|C3H30_ARATH; Zinc finger CCCH domain-containing protein 30 OS=Arabidopsis thaliana GN=At2g41900 PE=1 SV=2}	{vra:106756204; - - - - -}	{At2g41900; KOG1595 CCCH-type Zn-finger protein R General function prediction only ;}	{GO:0005515; protein binding; molecular_function GO:0046872; metal ion binding; molecular_function}	{XM_010059102.2; PREDICTED: Eucalyptus grandis zinc finger CCCH domain-containing protein 30 (LOC104445262), mRNA}	{PF13606:Ankyrin repeat PF00023:Ankyrin repeat PF00642:Zinc finger C-x8-C-x5-C-x3-H type (and similar)}
transcript_HQ_AA_transcript10034/f2p0/3382	{XP_006845732.1; PREDICTED: protein ROOT HAIR DEFECTIVE 3 homolog 1 [Amborella trichopoda]}	{sp|P93042|RHD3_ARATH; Protein ROOT HAIR DEFECTIVE 3 OS=Arabidopsis thaliana GN=RHD3 PE=1 SV=1}	{atr:18435626; - - - - -}	{At3g13870; KOG2203 GTP-binding protein R General function prediction only ;}	{GO:0005524; ATP binding; molecular_function GO:0005525; GTP binding; molecular_function GO:0016887; ATPase activity; molecular_function GO:0003924; GTPase activity; molecular_function GO:0005506; iron ion binding; molecular_function GO:0009055; NA GO:0020037; heme binding; molecular_function}	{XM_006845669.2; PREDICTED: Amborella trichopoda protein ROOT HAIR DEFECTIVE 3 homolog 1 (LOC18435626), mRNA}	{PF00005:ABC transporter PF01926:50S ribosome-binding GTPase PF01637:ATPase domain predominantly from Archaea PF01322:Cytochrome C' PF02263:Guanylate-binding protein, N-terminal domain}
transcript_HQ_AA_transcript10037/f2p0/3383	{JAT49876.1; Protein VAC14, partial [Anthurium amnicola]}	{sp|Q06708|VAC14_YEAST; Vacuole morphology and inheritance protein 14 OS=Saccharomyces cerevisiae (strain ATCC 204508 / S288c) GN=VAC14 PE=1 SV=1}	{ath:AT2G01690; K15305 VAC14, TAX1BP2 vacuole morphology and inheritance protein 14 - ko05203; Human Diseases; Cancers: Overview; Viral carcinogenesis | ko05166; Human Diseases; Infectious diseases: Viral; HTLV-I infection}	{YLR386w; KOG0212 Uncharacterized conserved protein S Function unknown ;}	{GO:0005515; protein binding; molecular_function}	{NA}	{PF02985:HEAT repeat}
transcript_HQ_AA_transcript10038/f2p0/3383	{ACN40198.1; unknown [Picea sitchensis]}	{sp|Q9FJD4|IMB1_ARATH; Importin subunit beta-1 OS=Arabidopsis thaliana GN=KPNB1 PE=1 SV=1}	{atr:18434807; K14293 KPNB1, IPO1 importin subunit beta-1 - ko03013; Genetic Information Processing; Translation; RNA transport}	{At5g53480; KOG1241 Karyopherin (importin) beta 1 YU Nuclear structure ; Intracellular trafficking, secretion, and vesicular transport ;}	{GO:0006886; intracellular protein transport; biological_process GO:0008536; Ran GTPase binding; molecular_function GO:0005515; protein binding; molecular_function}	{BT070694.1; Picea sitchensis clone WS02744_M07 unknown mRNA}	{PF03810:Importin-beta N-terminal domain PF02985:HEAT repeat}
transcript_HQ_AA_transcript10039/f3p0/3383	{XP_010275066.1; PREDICTED: uncharacterized protein LOC104610239 [Nelumbo nucifera]}	{sp|Q5R8V9|NIPA_PONAB; Nuclear-interacting partner of ALK OS=Pongo abelii GN=ZC3HC1 PE=2 SV=1}	{vvi:100254898; - - - - -}	{At1g17210; KOG4765 Uncharacterized conserved protein S Function unknown ;}	{GO:0005634; nucleus; cellular_component GO:0008270; zinc ion binding; molecular_function GO:0016787; hydrolase activity; molecular_function}	{BT117828.1; Picea glauca clone GQ03913_L19 mRNA sequence}	{PF07967:C3HC zinc finger-like PF02129:X-Pro dipeptidyl-peptidase (S15 family)}
transcript_HQ_AA_transcript10040/f2p0/3388	{AAC49686.1; isocitrate lyase [Pinus taeda]}	{sp|Q43097|ACEA_PINTA; Isocitrate lyase OS=Pinus taeda GN=ICL 8 PE=2 SV=1}	{cit:102615372; K01637 E4.1.3.1, aceA isocitrate lyase 4.1.3.1 ko01200; Metabolism; Global and overview maps; Carbon metabolism | ko00630; Metabolism; Carbohydrate metabolism; Glyoxylate and dicarboxylate metabolism}	{At3g21720; KOG1260 Isocitrate lyase C Energy production and conversion ;}	{GO:0004451; isocitrate lyase activity; molecular_function GO:0019752; carboxylic acid metabolic process; biological_process}	{U39454.1; Pinus taeda isocitrate lyase (ICL 12) mRNA, complete cds}	{PF00463:Isocitrate lyase family}
transcript_HQ_AA_transcript10044/f4p0/3338	{XP_001751679.1; predicted protein [Physcomitrella patens]}	{sp|Q9MAT6|HMG15_ARATH; High mobility group B protein 15 OS=Arabidopsis thaliana GN=HMGB15 PE=2 SV=1}	{smo:SELMODRAFT_35440; - - - - -}	{At1g04880_1; KOG2744 DNA-binding proteins Bright/BRCAA1/RBP1 and related proteins containing BRIGHT domain K Transcription ;}	{GO:0003677; DNA binding; molecular_function}	{NA}	{PF01388:ARID/BRIGHT DNA binding domain}
transcript_HQ_AA_transcript10045/f3p0/3357	{XP_001698537.1; hypothetical protein CHLREDRAFT_113366 [Chlamydomonas reinhardtii]}	{sp|P37515|MAA_BACSU; Probable maltose O-acetyltransferase OS=Bacillus subtilis (strain 168) GN=maa PE=3 SV=1}	{cre:CHLREDRAFT_113366; - - - - -}	{SPAC18B11.09c; KOG4750 Serine O-acetyltransferase E Amino acid transport and metabolism ;}	{GO:0006355; regulation of transcription, DNA-dependent; biological_process GO:0008270; zinc ion binding; molecular_function GO:0016407; acetyltransferase activity; molecular_function GO:0000981; sequence-specific DNA binding RNA polymerase II transcription factor activity; molecular_function GO:0005634; nucleus; cellular_component}	{NA}	{PF12464:Maltose acetyltransferase PF00172:Fungal Zn(2)-Cys(6) binuclear cluster domain}
transcript_HQ_AA_transcript10046/f3p0/3380	{XP_011627852.1; PREDICTED: probable E3 ubiquitin-protein ligase HIP1 isoform X2 [Amborella trichopoda]}	{sp|O49500|MBR2_ARATH; E3 ubiquitin-protein ligase MBR2 OS=Arabidopsis thaliana GN=MBR2 PE=1 SV=1}	{atr:18446288; K10635 RNF111 E3 ubiquitin-protein ligase Arkadia 2.3.2.27 -}	{At4g34040; KOG0800 FOG: Predicted E3 ubiquitin ligase O Posttranslational modification, protein turnover, chaperones ;}	{GO:0005680; anaphase-promoting complex; cellular_component GO:0008270; zinc ion binding; molecular_function GO:0005515; protein binding; molecular_function GO:0046872; metal ion binding; molecular_function GO:0004842; ubiquitin-protein ligase activity; molecular_function}	{BT115321.1; Picea glauca clone GQ03614_D03 mRNA sequence}	{PF12861:Anaphase-promoting complex subunit 11 RING-H2 finger PF00097:Zinc finger, C3HC4 type (RING finger) PF12906:RING-variant domain PF13639:Ring finger domain PF17123:RING-like zinc finger PF14634:zinc-RING finger domain PF12678:RING-H2 zinc finger domain}
transcript_HQ_AA_transcript10047/f2p0/3386	{ABK26001.1; unknown [Picea sitchensis]}	{NA}	{fve:101291901; - - - - -}	{NA}	{NA}	{NA}	{NA}
transcript_HQ_AA_transcript1005/f2p0/5675	{JAT78158.1; hypothetical protein g.68284 [Auxenochlorella protothecoides]}	{sp|O74835|RRP5_SCHPO; rRNA biogenesis protein rrp5 OS=Schizosaccharomyces pombe (strain 972 / ATCC 24843) GN=rrp5 PE=1 SV=1}	{ota:Ot10g00010; K14792 RRP5, PDCD11 rRNA biogenesis protein RRP5 - -}	{SPCC1183.07; KOG1070 rRNA processing protein Rrp5 A RNA processing and modification ;}	{GO:0006397; mRNA processing; biological_process GO:0005634; nucleus; cellular_component GO:0006397; mRNA processing; biological_process GO:0003676; nucleic acid binding; molecular_function GO:0005634; nucleus; cellular_component}	{NA}	{PF05843:Suppressor of forked protein (Suf) PF00575:S1 RNA binding domain PF05843:Suppressor of forked protein (Suf)}
transcript_HQ_AA_transcript10051/f5p0/3348	{XP_008442516.1; PREDICTED: L-type lectin-domain containing receptor kinase S.4-like [Cucumis melo]}	{sp|Q9M2S4|LRKS4_ARATH; L-type lectin-domain containing receptor kinase S.4 OS=Arabidopsis thaliana GN=LECRKS4 PE=2 SV=1}	{cmo:103486367; - - - - -}	{NA}	{GO:0005524; ATP binding; molecular_function GO:0030246; carbohydrate binding; molecular_function GO:0004672; protein kinase activity; molecular_function GO:0006468; protein phosphorylation; biological_process}	{XM_015790626.1; PREDICTED: Oryza sativa Japonica Group L-type lectin-domain containing receptor kinase IV.1 (LOC4342330), mRNA}	{PF00069:Protein kinase domain PF00139:Legume lectin domain PF07714:Protein tyrosine kinase}
transcript_HQ_AA_transcript10052/f4p0/3333	{XP_018847842.1; PREDICTED: coatomer subunit gamma-2 [Juglans regia]}	{sp|P87140|COPG_SCHPO; Probable coatomer subunit gamma OS=Schizosaccharomyces pombe (strain 972 / ATCC 24843) GN=sec21 PE=1 SV=1}	{gmx:100814149; K17267 COPG coatomer subunit gamma - -}	{SPAC57A7.10c; KOG1078 Vesicle coat complex COPI, gamma subunit U Intracellular trafficking, secretion, and vesicular transport ;}	{GO:0005198; NA GO:0030117; membrane coat; cellular_component GO:0030126; COPI vesicle coat; cellular_component GO:0006886; intracellular protein transport; biological_process GO:0005515; protein binding; molecular_function GO:0016192; vesicle-mediated transport; biological_process}	{XM_006649602.2; PREDICTED: Oryza brachyantha coatomer subunit gamma-1 (LOC102708780), mRNA}	{PF02985:HEAT repeat PF01602:Adaptin N terminal region PF08752:Coatomer gamma subunit appendage platform subdomain}
transcript_HQ_AA_transcript10056/f2p0/3401	{XP_006849701.1; PREDICTED: probable GTP diphosphokinase RSH2, chloroplastic [Amborella trichopoda]}	{sp|Q9LVJ3|RSH2C_ARATH; Probable GTP diphosphokinase RSH2, chloroplastic OS=Arabidopsis thaliana GN=RSH2 PE=2 SV=1}	{atr:18439474; - - - - -}	{At3g14050; KOG1157 Predicted guanosine polyphosphate pyrophosphohydrolase/synthase T Signal transduction mechanisms ;}	{NA}	{BT109829.1; Picea glauca clone GQ03212_N08 mRNA sequence}	{NA}
transcript_HQ_AA_transcript10057/f13p0/3330	{NA}	{NA}	{NA}	{NA}	{GO:0008484; sulfuric ester hydrolase activity; molecular_function GO:0003824; NA GO:0008152; NA GO:0046872; metal ion binding; molecular_function}	{NA}	{PF01676:Metalloenzyme superfamily PF00884:Sulfatase PF01663:Type I phosphodiesterase / nucleotide pyrophosphatase}
transcript_HQ_AA_transcript10058/f2p0/3152	{XP_015950499.1; PREDICTED: abscisic acid receptor PYL4-like [Arachis duranensis]}	{sp|O80992|PYL2_ARATH; Abscisic acid receptor PYL2 OS=Arabidopsis thaliana GN=PYL2 PE=1 SV=1}	{adu:107475382; K14496 PYL abscisic acid receptor PYR/PYL family - ko04016; Environmental Information Processing; Signal transduction; MAPK signaling pathway - plant | ko04075; Environmental Information Processing; Signal transduction; Plant hormone signal transduction}	{NA}	{GO:0006952; defense response; biological_process GO:0009607; response to biotic stimulus; biological_process}	{XM_010531727.2; PREDICTED: Tarenaya hassleriana abscisic acid receptor PYR1-like (LOC104806706), mRNA}	{PF00407:Pathogenesis-related protein Bet v I family}
transcript_HQ_AA_transcript1006/f2p0/5703	{JAT43956.1; DIS3-like exonuclease 2 [Anthurium amnicola]}	{sp|Q5AK62|SSD1_CANAL; Virulence protein SSD1 OS=Candida albicans (strain SC5314 / ATCC MYA-2876) GN=SSD1 PE=2 SV=1}	{smo:SELMODRAFT_129119; K12585 DIS3, RRP44 exosome complex exonuclease DIS3/RRP44 3.1.13.- ko03018; Genetic Information Processing; Folding, sorting and degradation; RNA degradation}	{YDR293c; KOG2102 Exosomal 3'-5' exoribonuclease complex, subunit Rrp44/Dis3 J Translation, ribosomal structure and biogenesis ;}	{NA}	{NA}	{NA}
transcript_HQ_AA_transcript10060/f2p0/3406	{XP_008652306.1; PREDICTED: protein SMG7-like [Zea mays]}	{sp|A9QM73|SMG7_ARATH; Protein SMG7 OS=Arabidopsis thaliana GN=SMG7 PE=2 SV=1}	{zma:100278146; K14409 SMG7, EST1C protein SMG7 - ko03015; Genetic Information Processing; Translation; mRNA surveillance pathway}	{At5g19400; KOG2162 Nonsense-mediated mRNA decay protein A RNA processing and modification ;}	{NA}	{NA}	{NA}
transcript_HQ_AA_transcript10064/f2p0/3399	{XP_002505472.1; predicted protein [Micromonas commoda]}	{sp|P40341|YTA12_YEAST; Mitochondrial respiratory chain complexes assembly protein YTA12 OS=Saccharomyces cerevisiae (strain ATCC 204508 / S288c) GN=YTA12 PE=1 SV=2}	{mis:MICPUN_92259; K08956 AFG3 AFG3 family protein 3.4.24.- -}	{YMR089c; KOG0731 AAA+-type ATPase containing the peptidase M41 domain O Posttranslational modification, protein turnover, chaperones ;}	{GO:0004222; metalloendopeptidase activity; molecular_function GO:0003678; DNA helicase activity; molecular_function GO:0006508; proteolysis; biological_process GO:0009378; four-way junction helicase activity; molecular_function GO:0016887; ATPase activity; molecular_function GO:0005524; ATP binding; molecular_function GO:0006310; DNA recombination; biological_process GO:0016021; integral to memb…	{NA}	{PF00004:ATPase family associated with various cellular activities (AAA) PF06480:FtsH Extracellular PF06068:TIP49 C-terminus PF07724:AAA domain (Cdc48 subfamily) PF05238:Kinetochore protein CHL4 like PF01695:IstB-like ATP binding protein PF07728:AAA domain (dynein-related subfamily) PF05496:Holliday junction DNA helicase ruvB N-terminus PF01434:Peptidase family M41}
transcript_HQ_AA_transcript10066/f3p0/3382	{NA}	{NA}	{NA}	{NA}	{NA}	{NA}	{NA}
transcript_HQ_AA_transcript10071/f2p0/3377	{NA}	{NA}	{NA}	{NA}	{GO:0008152; NA GO:0008168; methyltransferase activity; molecular_function}	{NA}	{PF08241:Methyltransferase domain}
transcript_HQ_AA_transcript10072/f2p0/3385	{ERN07200.1; hypothetical protein AMTR_s00019p00169230 [Amborella trichopoda]}	{sp|Q9C7E7|RDM16_ARATH; Protein RDM16 OS=Arabidopsis thaliana GN=RDM16 PE=2 SV=1}	{atr:18435417; K12843 PRPF3, PRP3 U4/U6 small nuclear ribonucleoprotein PRP3 - ko03040; Genetic Information Processing; Transcription; Spliceosome}	{At1g28060; KOG2769 Putative u4/u6 small nuclear ribonucleoprotein A RNA processing and modification ;}	{NA}	{XM_019197286.1; PREDICTED: Nelumbo nucifera U4/U6 small nuclear ribonucleoprotein Prp3 (LOC104594680), transcript variant X4, mRNA}	{NA}
transcript_HQ_AA_transcript10073/f2p0/3387	{GAQ78702.1; N-acetyltransferase 10 [Klebsormidium flaccidum]}	{sp|P53914|NAT10_YEAST; RNA cytidine acetyltransferase OS=Saccharomyces cerevisiae (strain ATCC 204508 / S288c) GN=NAT10 PE=1 SV=1}	{cre:CHLREDRAFT_137045; K14521 NAT10, KRE33 N-acetyltransferase 10 2.3.1.- ko03008; Genetic Information Processing; Translation; Ribosome biogenesis in eukaryotes}	{YNL132w; KOG2036 Predicted P-loop ATPase fused to an acetyltransferase R General function prediction only ;}	{GO:0008080; N-acetyltransferase activity; molecular_function}	{NA}	{PF13718:GNAT acetyltransferase 2}
transcript_HQ_AA_transcript10075/f2p0/3377	{XP_011625763.1; PREDICTED: pyrophosphate-energized membrane proton pump 2 isoform X1 [Amborella trichopoda]}	{sp|Q56ZN6|AVP2_ARATH; Pyrophosphate-energized membrane proton pump 2 OS=Arabidopsis thaliana GN=AVPL1 PE=1 SV=2}	{atr:18440749; - - - - -}	{NA}	{GO:0004427; inorganic diphosphatase activity; molecular_function GO:0015992; proton transport; biological_process GO:0009678; hydrogen-translocating pyrophosphatase activity; molecular_function GO:0016020; membrane; cellular_component}	{BT106541.1; Picea glauca clone GQ03004_H20 mRNA sequence}	{PF03030:Inorganic H+ pyrophosphatase}
transcript_HQ_AA_transcript10076/f2p0/3381	{CBA12007.1; putative auxin response factor 10/16/17, partial [Cycas rumphii]}	{sp|Q653H7|ARFR_ORYSJ; Auxin response factor 18 OS=Oryza sativa subsp. japonica GN=ARF18 PE=2 SV=1}	{nnu:104594869; - - - - -}	{NA}	{GO:0005634; nucleus; cellular_component GO:0009725; response to hormone stimulus; biological_process GO:0003677; DNA binding; molecular_function GO:0006355; regulation of transcription, DNA-dependent; biological_process}	{FN433183.1; Cycas rumphii partial mRNA for putative auxin response factor 10/16/17 (arf10/16/17 gene)}	{PF02362:B3 DNA binding domain PF06507:Auxin response factor}
transcript_HQ_AA_transcript10078/f2p0/3374	{XP_018723889.1; PREDICTED: pollen-specific protein SF21 isoform X1 [Eucalyptus grandis]}	{sp|O23969|SF21_HELAN; Pollen-specific protein SF21 OS=Helianthus annuus GN=SF21 PE=2 SV=1}	{cic:CICLE_v10001660mg; - - - - -}	{At5g11790; KOG2931 Differentiation-related gene 1 protein (NDR1 protein), related proteins S Function unknown ;}	{NA}	{BT118697.1; Picea glauca clone GQ04009_D18 mRNA sequence}	{NA}
transcript_HQ_AA_transcript10084/f10p0/3377	{GAQ90703.1; hypothetical protein KFL_006760020 [Klebsormidium flaccidum]}	{sp|A0A0D2YG01|FUB8_FUSO4; Non-canonical non-ribosomal peptide synthetase FUB8 OS=Fusarium oxysporum f. sp. lycopersici (strain 4287 / CBS 123668 / FGSC 9935 / NRRL 34936) GN=FUB8 PE=1 SV=1}	{bpg:Bathy14g02980; - - - - -}	{SPAP7G5.04c; KOG1178 Non-ribosomal peptide synthetase/alpha-aminoadipate reductase and related enzymes Q Secondary metabolites biosynthesis, transport and catabolism ;}	{GO:0016616; oxidoreductase activity, acting on the CH-OH group of donors, NAD or NADP as acceptor; molecular_function GO:0006694; steroid biosynthetic process; biological_process GO:0055114; oxidation-reduction process; biological_process GO:0003854; 3-beta-hydroxy-delta5-steroid dehydrogenase activity; molecular_function GO:0008152; NA GO:0050662; coenzyme binding; molecular_function GO:0003824…	{NA}	{PF01073:3-beta hydroxysteroid dehydrogenase/isomerase family PF01370:NAD dependent epimerase/dehydratase family PF00501:AMP-binding enzyme}
transcript_HQ_AA_transcript10085/f2p0/3405	{ADE75755.1; unknown [Picea sitchensis]}	{sp|P59326|YTHD1_MOUSE; YTH domain-containing family protein 1 OS=Mus musculus GN=Ythdf1 PE=1 SV=1}	{atr:18448943; K20102 YTHDF YTH domain-containing family protein - -}	{At1g79270; KOG1901 Uncharacterized high-glucose-regulated protein R General function prediction only ;}	{GO:0003723; RNA binding; molecular_function}	{XM_015832597.1; PREDICTED: Oryza brachyantha uncharacterized LOC102707720 (LOC102707720), transcript variant X2, mRNA}	{PF04146:YT521-B-like domain}
transcript_HQ_AA_transcript10088/f15p0/3271	{BAJ99339.1; predicted protein [Hordeum vulgare subsp. vulgare]}	{sp|P28876|PMA2_SCHPO; Plasma membrane ATPase 2 OS=Schizosaccharomyces pombe (strain 972 / ATCC 24843) GN=pma2 PE=3 SV=1}	{vcn:VOLCADRAFT_103448; K01535 PMA1, PMA2 H+-transporting ATPase 3.6.3.6 ko00190; Metabolism; Energy metabolism; Oxidative phosphorylation}	{SPAC1071.10c; KOG0205 Plasma membrane H+-transporting ATPase P Inorganic ion transport and metabolism ;}	{GO:0046872; metal ion binding; molecular_function GO:0000166; nucleotide binding; molecular_function}	{AK110020.1; Oryza sativa Japonica Group cDNA clone:002-159-H09, full insert sequence}	{PF00122:E1-E2 ATPase}
transcript_HQ_AA_transcript1009/f3p0/5718	{OAE28266.1; hypothetical protein AXG93_223s1020 [Marchantia polymorpha subsp. polymorpha]}	{sp|Q6P158|DHX57_HUMAN; Putative ATP-dependent RNA helicase DHX57 OS=Homo sapiens GN=DHX57 PE=1 SV=2}	{ppp:PHYPADRAFT_175128; K13026 DHX57 ATP-dependent RNA helicase DHX57 3.6.4.13 -}	{Hs21717812; KOG0920 ATP-dependent RNA helicase A A RNA processing and modification ;}	{GO:0005524; ATP binding; molecular_function GO:0003676; nucleic acid binding; molecular_function GO:0005515; protein binding; molecular_function GO:0046872; metal ion binding; molecular_function GO:0004386; helicase activity; molecular_function}	{NA}	{PF04408:Helicase associated domain (HA2) PF05773:RWD domain PF00096:Zinc finger, C2H2 type PF00270:DEAD/DEAH box helicase PF13465:Zinc-finger double domain}
transcript_HQ_AA_transcript10092/f2p0/3379	{XP_006878540.1; PREDICTED: adoMet-dependent rRNA methyltransferase spb1 [Amborella trichopoda]}	{sp|O42832|SPB1_SCHPO; AdoMet-dependent rRNA methyltransferase spb1 OS=Schizosaccharomyces pombe (strain 972 / ATCC 24843) GN=spb1 PE=1 SV=2}	{atr:18436411; K14857 SPB1, FTSJ3 AdoMet-dependent rRNA methyltransferase SPB1 2.1.1.- -}	{At4g25730; KOG1098 Putative SAM-dependent rRNA methyltransferase SPB1 AR RNA processing and modification ; General function prediction only ;}	{GO:0032259; methylation; biological_process GO:0006364; rRNA processing; biological_process GO:0005634; nucleus; cellular_component GO:0008168; methyltransferase activity; molecular_function}	{BT124307.1; Picea sitchensis clone WS0472_N13 unknown mRNA}	{PF01728:FtsJ-like methyltransferase PF07780:Spb1 C-terminal domain}
transcript_HQ_AA_transcript10095/f3p0/3380	{XP_008442226.1; PREDICTED: gamma-tubulin complex component 3 [Cucumis melo]}	{sp|Q9USQ2|ALP6_SCHPO; Spindle pole body component alp6 OS=Schizosaccharomyces pombe (strain 972 / ATCC 24843) GN=alp6 PE=1 SV=2}	{cmo:103486142; K16570 TUBGCP3, GCP3 gamma-tubulin complex component 3 - -}	{Hs5453660; KOG2000 Gamma-tubulin complex, DGRIP91/SPC98 component Z Cytoskeleton ;}	{GO:0043015; gamma-tubulin binding; molecular_function GO:0005815; microtubule organizing center; cellular_component GO:0007020; microtubule nucleation; biological_process GO:0000226; microtubule cytoskeleton organization; biological_process GO:0000922; spindle pole; cellular_component}	{NA}	{PF04130:Spc97 / Spc98 family}
transcript_HQ_AA_transcript10098/f11p0/3338	{ABR16832.1; unknown [Picea sitchensis]}	{sp|C0LGQ4|MDIS2_ARATH; Protein MALE DISCOVERER 2 OS=Arabidopsis thaliana GN=MDIS2 PE=2 SV=1}	{vvi:100251542; - - - - -}	{NA}	{GO:0005524; ATP binding; molecular_function GO:0004672; protein kinase activity; molecular_function GO:0005515; protein binding; molecular_function GO:0006468; protein phosphorylation; biological_process}	{BT106875.1; Picea glauca clone GQ03012_K10 mRNA sequence}	{PF00560:Leucine Rich Repeat PF07714:Protein tyrosine kinase PF13855:Leucine rich repeat PF13516:Leucine Rich repeat PF00069:Protein kinase domain}
transcript_HQ_AA_transcript10099/f3p0/3387	{XP_010646075.1; PREDICTED: ubiquitin carboxyl-terminal hydrolase 5 [Vitis vinifera]}	{sp|Q9ZSB5|UBP10_ARATH; Ubiquitin carboxyl-terminal hydrolase 10 OS=Arabidopsis thaliana GN=UBP10 PE=2 SV=2}	{vvi:100258589; - - - - -}	{At4g10590; KOG1870 Ubiquitin C-terminal hydrolase O Posttranslational modification, protein turnover, chaperones ;}	{GO:0016579; protein deubiquitination; biological_process GO:0036459; NA}	{BT112367.1; Picea glauca clone GQ03313_O18 mRNA sequence}	{PF00443:Ubiquitin carboxyl-terminal hydrolase}
transcript_HQ_AA_transcript1010/f3p0/5740	{ERN03855.1; hypothetical protein AMTR_s00078p00155240 [Amborella trichopoda]}	{sp|Q4WXV6|BBP_ASPFU; Branchpoint-bridging protein OS=Neosartorya fumigata (strain ATCC MYA-4609 / Af293 / CBS 101355 / FGSC A1100) GN=bbp PE=3 SV=1}	{pop:POPTR_0003s10640g; K13095 SF1 splicing factor 1 - -}	{At5g51300; KOG0119 Splicing factor 1/branch point binding protein (RRM superfamily) A RNA processing and modification ;}	{GO:0008270; zinc ion binding; molecular_function GO:0005515; protein binding; molecular_function GO:0003676; nucleic acid binding; molecular_function GO:0003723; RNA binding; molecular_function}	{XM_013599923.1; Medicago truncatula splicing factor-like protein mRNA}	{PF16866:PHD-finger PF00076:RNA recognition motif. (a.k.a. RRM, RBD, or RNP domain) PF00013:KH domain PF00098:Zinc knuckle PF16367:RNA recognition motif}
transcript_HQ_AA_transcript10103/f3p0/3399	{XP_002965312.1; hypothetical protein SELMODRAFT_439163 [Selaginella moellendorffii]}	{sp|P31542|CLPAB_SOLLC; ATP-dependent Clp protease ATP-binding subunit ClpA homolog CD4B, chloroplastic OS=Solanum lycopersicum GN=CD4B PE=3 SV=1}	{pda:103708061; K03696 clpC ATP-dependent Clp protease ATP-binding subunit ClpC - -}	{At5g50920; KOG1051 Chaperone HSP104 and related ATP-dependent Clp proteases O Posttranslational modification, protein turnover, chaperones ;}	{GO:0006281; DNA repair; biological_process GO:0003724; RNA helicase activity; molecular_function GO:0006810; transport; biological_process GO:0009378; four-way junction helicase activity; molecular_function GO:0005515; protein binding; molecular_function GO:0003723; RNA binding; molecular_function GO:0006355; regulation of transcription, DNA-dependent; biological_process GO:0003924; GTPase activ…	{BT110916.1; Picea glauca clone GQ03229_M14 mRNA sequence}	{PF00005:ABC transporter PF06414:Zeta toxin PF00004:ATPase family associated with various cellular activities (AAA) PF00910:RNA helicase PF02151:UvrB/uvrC motif PF00437:Type II/IV secretion system protein PF02861:Clp amino terminal domain, pathogenicity island component PF03193:Protein of unknown function, DUF258 PF01695:IstB-like ATP binding protein PF07724:AAA domain (Cdc48 subfamily) PF00158:S…
transcript_HQ_AA_transcript10108/f2p0/3514	{XP_010252413.1; PREDICTED: serine/threonine-protein kinase BLUS1-like isoform X1 [Nelumbo nucifera]}	{sp|Q551H4|FRAY2_DICDI; Serine/threonine-protein kinase fray2 OS=Dictyostelium discoideum GN=fray2 PE=3 SV=1}	{nnu:104593986; - - - - -}	{At4g24100; KOG0582 Ste20-like serine/threonine protein kinase T Signal transduction mechanisms ;}	{GO:0016020; membrane; cellular_component GO:0051382; kinetochore assembly; biological_process GO:0005524; ATP binding; molecular_function GO:0004672; protein kinase activity; molecular_function GO:0006468; protein phosphorylation; biological_process GO:0016773; phosphotransferase activity, alcohol group as acceptor; molecular_function GO:0000776; kinetochore; cellular_component}	{XM_010254115.2; PREDICTED: Nelumbo nucifera serine/threonine-protein kinase BLUS1-like (LOC104593986), transcript variant X2, mRNA}	{PF06293:Lipopolysaccharide kinase (Kdo/WaaP) family PF00069:Protein kinase domain PF05837:Centromere protein H (CENP-H) PF07714:Protein tyrosine kinase}
transcript_HQ_AA_transcript10109/f2p0/3391	{XP_010247969.1; PREDICTED: probable UDP-N-acetylglucosamine--peptide N-acetylglucosaminyltransferase SEC [Nelumbo nucifera]}	{sp|Q9M8Y0|SEC_ARATH; Probable UDP-N-acetylglucosamine--peptide N-acetylglucosaminyltransferase SEC OS=Arabidopsis thaliana GN=SEC PE=2 SV=1}	{atr:18438203; K09667 OGT protein O-GlcNAc transferase 2.4.1.255 ko00514; Metabolism; Glycan biosynthesis and metabolism; Other types of O-glycan biosynthesis | ko04931; Human Diseases; Endocrine and metabolic diseases; Insulin resistance}	{At3g04240; KOG4626 O-linked N-acetylglucosamine transferase OGT GOT Carbohydrate transport and metabolism ; Posttranslational modification, protein turnover, chaperones ; Signal transduction mechanisms ;}	{GO:0005515; protein binding; molecular_function}	{BT117387.1; Picea glauca clone GQ03818_F08 mRNA sequence}	{PF13176:Tetratricopeptide repeat PF13181:Tetratricopeptide repeat PF13371:Tetratricopeptide repeat PF02259:FAT domain PF00515:Tetratricopeptide repeat PF13414:TPR repeat PF13174:Tetratricopeptide repeat PF13374:Tetratricopeptide repeat}
transcript_HQ_AA_transcript1011/f3p0/5733	{XP_010923413.1; PREDICTED: splicing factor, suppressor of white-apricot homolog isoform X3 [Elaeis guineensis]}	{sp|Q12872|SFSWA_HUMAN; Splicing factor, suppressor of white-apricot homolog OS=Homo sapiens GN=SFSWAP PE=1 SV=3}	{egu:105046502; - - - - -}	{At5g55100; KOG1847 mRNA splicing factor A RNA processing and modification ;}	{GO:0003723; RNA binding; molecular_function GO:0006396; RNA processing; biological_process}	{AK366559.1; Hordeum vulgare subsp. vulgare mRNA for predicted protein, partial cds, clone: NIASHv2044D18}	{PF01805:Surp module}
transcript_HQ_AA_transcript10112/f2p0/3368	{ABR16216.1; unknown [Picea sitchensis]}	{sp|Q9SJG6|PP200_ARATH; Pentatricopeptide repeat-containing protein At2g42920, chloroplastic OS=Arabidopsis thaliana GN=PCMP-E75 PE=2 SV=1}	{atr:18434065; - - - - -}	{At2g42920; KOG4197 FOG: PPR repeat R General function prediction only ;}	{NA}	{NA}	{NA}
transcript_HQ_AA_transcript10113/f3p0/3394	{XP_003629056.1; 3-hydroxy-3-methylglutaryl-coenzyme A reductase-like protein [Medicago truncatula]}	{sp|Q3S2U3|MOKG_MONPI; 3-hydroxy-3-methylglutaryl coenzyme A reductase mokG OS=Monascus pilosus GN=mokG PE=1 SV=1}	{mtr:MTR_8g072640; K00021 HMGCR hydroxymethylglutaryl-CoA reductase (NADPH) 1.1.1.34 ko00900; Metabolism; Metabolism of terpenoids and polyketides; Terpenoid backbone biosynthesis | ko04152; Environmental Information Processing; Signal transduction; AMPK signaling pathway | ko04976; Organismal Systems; Digestive system; Bile secretion}	{YML075c; KOG2480 3-hydroxy-3-methylglutaryl-CoA (HMG-CoA) reductase I Lipid transport and metabolism ;}	{GO:0004420; hydroxymethylglutaryl-CoA reductase (NADPH) activity; molecular_function GO:0050662; coenzyme binding; molecular_function GO:0016021; integral to membrane; cellular_component GO:0055114; oxidation-reduction process; biological_process GO:0015936; coenzyme A metabolic process; biological_process}	{NA}	{PF02460:Patched family PF00368:Hydroxymethylglutaryl-coenzyme A reductase}
transcript_HQ_AA_transcript10115/f2p0/3370	{XP_016473199.1; PREDICTED: potassium channel AKT1-like isoform X1 [Nicotiana tabacum]}	{sp|Q38998|AKT1_ARATH; Potassium channel AKT1 OS=Arabidopsis thaliana GN=AKT1 PE=1 SV=2}	{nta:107771654; - - - - -}	{At2g26650; KOG0498 K+-channel ERG and related proteins, contain PAS/PAC sensor domain PT Inorganic ion transport and metabolism ; Signal transduction mechanisms ;}	{GO:0005515; protein binding; molecular_function GO:0006811; ion transport; biological_process GO:0016020; membrane; cellular_component GO:0005216; ion channel activity; molecular_function GO:0055085; transmembrane transport; biological_process}	{BT105843.1; Picea glauca clone GQ02829_E08 mRNA sequence}	{PF13606:Ankyrin repeat PF00023:Ankyrin repeat PF00520:Ion transport protein}
transcript_HQ_AA_transcript10117/f2p0/3388	{XP_009790634.1; PREDICTED: 60S ribosomal protein L32-1-like [Nicotiana sylvestris]}	{sp|P49211|RL321_ARATH; 60S ribosomal protein L32-1 OS=Arabidopsis thaliana GN=RPL32A PE=2 SV=2}	{cann:107859076; - - - - -}	{At4g18100; KOG0878 60S ribosomal protein L32 J Translation, ribosomal structure and biogenesis ;}	{GO:0005840; ribosome; cellular_component GO:0003735; structural constituent of ribosome; molecular_function GO:0006412; translation; biological_process GO:0005622; intracellular; cellular_component}	{BT111655.1; Picea glauca clone GQ03301_N19 mRNA sequence}	{PF01655:Ribosomal protein L32}
transcript_HQ_AA_transcript10118/f2p0/3370	{XP_019421186.1; PREDICTED: uncharacterized protein LOC109331257 [Lupinus angustifolius]}	{NA}	{atr:18439621; - - - - -}	{NA}	{NA}	{NA}	{NA}
transcript_HQ_AA_transcript10119/f2p0/3378	{NA}	{sp|O13930|SEC2_SCHPO; Rab guanine nucleotide exchange factor sec2 OS=Schizosaccharomyces pombe (strain 972 / ATCC 24843) GN=sec2 PE=1 SV=1}	{NA}	{SPAC23C4.10; KOG4324 Guanine nucleotide exchange factor U Intracellular trafficking, secretion, and vesicular transport ;}	{GO:0005577; fibrinogen complex; cellular_component GO:0008152; NA GO:0030674; protein binding, bridging; molecular_function GO:0030168; platelet activation; biological_process GO:0016491; oxidoreductase activity; molecular_function GO:0007165; signal transduction; biological_process GO:0051258; protein polymerization; biological_process GO:0005102; receptor binding; molecular_function GO:0055114…	{NA}	{PF08702:Fibrinogen alpha/beta chain family PF00171:Aldehyde dehydrogenase family}
transcript_HQ_AA_transcript1012/f2p0/5730	{NP_174329.1; multidrug resistance-associated protein 1 [Arabidopsis thaliana]}	{sp|P32386|YBT1_YEAST; ATP-dependent bile acid permease OS=Saccharomyces cerevisiae (strain ATCC 204508 / S288c) GN=YBT1 PE=1 SV=2}	{ath:AT1G30400; - - - - -}	{YLL048c; KOG0054 Multidrug resistance-associated protein/mitoxantrone resistance protein, ABC superfamily Q Secondary metabolites biosynthesis, transport and catabolism ;}	{GO:0006810; transport; biological_process GO:0042626; ATPase activity, coupled to transmembrane movement of substances; molecular_function GO:0016301; kinase activity; molecular_function GO:0000166; nucleotide binding; molecular_function GO:0003924; GTPase activity; molecular_function GO:0016021; integral to membrane; cellular_component GO:0003677; DNA binding; molecular_function GO:0005525; GTP…	{NA}	{PF00664:ABC transporter transmembrane region PF01580:FtsK/SpoIIIE family PF01695:IstB-like ATP binding protein PF13304:AAA domain, putative AbiEii toxin, Type IV TA system PF00437:Type II/IV secretion system protein PF03193:Protein of unknown function, DUF258 PF00005:ABC transporter PF06414:Zeta toxin PF01926:50S ribosome-binding GTPase PF00004:ATPase family associated with various cellular acti…
transcript_HQ_AA_transcript10124/f2p0/3376	{ABR16509.1; unknown [Picea sitchensis]}	{sp|Q42910|PPDK_MESCR; Pyruvate, phosphate dikinase, chloroplastic OS=Mesembryanthemum crystallinum GN=PPD PE=2 SV=1}	{cmo:103483770; K01006 ppdK pyruvate, orthophosphate dikinase 2.7.9.1 ko01200; Metabolism; Global and overview maps; Carbon metabolism | ko00620; Metabolism; Carbohydrate metabolism; Pyruvate metabolism | ko00710; Metabolism; Energy metabolism; Carbon fixation in photosynthetic organisms | ko00720; Metabolism; Energy metabolism; Carbon fixation pathways in prokaryotes}	{NA}	{GO:0009507; chloroplast; cellular_component GO:0055114; oxidation-reduction process; biological_process GO:0016772; transferase activity, transferring phosphorus-containing groups; molecular_function GO:0046422; violaxanthin de-epoxidase activity; molecular_function GO:0016301; kinase activity; molecular_function GO:0016310; phosphorylation; biological_process GO:0005524; ATP binding; molecular_…	{EF676619.1; Picea sitchensis clone WS02744_L01 unknown mRNA}	{PF00391:PEP-utilising enzyme, mobile domain PF01326:Pyruvate phosphate dikinase, PEP/pyruvate binding domain PF02896:PEP-utilising enzyme, TIM barrel domain PF07137:VDE lipocalin domain}
transcript_HQ_AA_transcript10127/f2p0/3425	{XP_006836424.1; PREDICTED: WD repeat-containing protein 75 [Amborella trichopoda]}	{sp|Q7ZVR1|WDR75_DANRE; WD repeat-containing protein 75 OS=Danio rerio GN=wdr75 PE=2 SV=2}	{pmum:103323546; K14552 NAN1, UTP17, WDR75 NET1-associated nuclear protein 1 (U3 small nucleolar RNA-associated protein 17) - ko03008; Genetic Information Processing; Translation; Ribosome biogenesis in eukaryotes}	{At2g18900; KOG1963 WD40 repeat protein R General function prediction only ;}	{GO:0005515; protein binding; molecular_function}	{NA}	{PF00400:WD domain, G-beta repeat}
transcript_HQ_AA_transcript10128/f2p0/3381	{OAE26425.1; hypothetical protein AXG93_131s1350 [Marchantia polymorpha subsp. polymorpha]}	{NA}	{atr:18439755; K15216 RRN3, TIFIA RNA polymerase I-specific transcription initiation factor RRN3 - -}	{At2g34750; KOG2434 RNA polymerase I transcription factor K Transcription ;}	{NA}	{BT104285.1; Picea glauca clone GQ02808_I13 mRNA sequence}	{NA}
transcript_HQ_AA_transcript1013/f2p0/5687	{XP_006849886.1; PREDICTED: probable cellulose synthase A catalytic subunit 5 [UDP-forming] [Amborella trichopoda]}	{sp|A2XNT2|CESA5_ORYSI; Probable cellulose synthase A catalytic subunit 5 [UDP-forming] OS=Oryza sativa subsp. indica GN=CESA5 PE=3 SV=1}	{atr:18439664; K10999 CESA cellulose synthase A 2.4.1.12 -}	{NA}	{GO:0030244; cellulose biosynthetic process; biological_process GO:0016760; cellulose synthase (UDP-forming) activity; molecular_function GO:0016020; membrane; cellular_component}	{XM_002277677.3; PREDICTED: Vitis vinifera probable cellulose synthase A catalytic subunit 5 [UDP-forming] (LOC100242715), mRNA}	{PF03552:Cellulose synthase}
transcript_HQ_AA_transcript10133/f2p0/3411	{AFG68993.1; hypothetical protein 0_10618_01, partial [Pinus taeda]}	{sp|Q9SPL2|CIP8_ARATH; E3 ubiquitin-protein ligase CIP8 OS=Arabidopsis thaliana GN=CIP8 PE=1 SV=1}	{rcu:8267979; - - - - -}	{At5g01980; KOG0800 FOG: Predicted E3 ubiquitin ligase O Posttranslational modification, protein turnover, chaperones ;}	{GO:0004842; ubiquitin-protein ligase activity; molecular_function GO:0005515; protein binding; molecular_function GO:0046872; metal ion binding; molecular_function GO:0005680; anaphase-promoting complex; cellular_component GO:0016226; iron-sulfur cluster assembly; biological_process GO:0008270; zinc ion binding; molecular_function}	{FJ044443.1; Pinus taeda isolate 6213 anonymous locus 0_10618_01 genomic sequence}	{PF13639:Ring finger domain PF17123:RING-like zinc finger PF14634:zinc-RING finger domain PF12678:RING-H2 zinc finger domain PF01458:Uncharacterized protein family (UPF0051) PF12861:Anaphase-promoting complex subunit 11 RING-H2 finger PF00097:Zinc finger, C3HC4 type (RING finger)}
transcript_HQ_AA_transcript10135/f2p0/3371	{BAJ98151.1; predicted protein [Hordeum vulgare subsp. vulgare]}	{sp|P54898|ARG56_NEUCR; Protein arg-6, mitochondrial OS=Neurospora crassa (strain ATCC 24698 / 74-OR23-1A / CBS 708.71 / DSM 1257 / FGSC 987) GN=arg-6 PE=1 SV=2}	{jcu:105634240; K00145 argC N-acetyl-gamma-glutamyl-phosphate reductase 1.2.1.38 ko01210; Metabolism; Global and overview maps; 2-Oxocarboxylic acid metabolism | ko01230; Metabolism; Global and overview maps; Biosynthesis of amino acids | ko00220; Metabolism; Amino acid metabolism; Arginine biosynthesis}	{YER069w_1; KOG2436 Acetylglutamate kinase/acetylglutamate synthase E Amino acid transport and metabolism ;}	{GO:0007049; cell cycle; biological_process GO:0051287; NAD binding; molecular_function GO:0048478; replication fork protection; biological_process GO:0005634; nucleus; cellular_component GO:0055114; oxidation-reduction process; biological_process GO:0008839; dihydrodipicolinate reductase activity; molecular_function GO:0016620; oxidoreductase activity, acting on the aldehyde or oxo group of dono…	{NA}	{PF01113:Dihydrodipicolinate reductase, N-terminus PF07962:Replication Fork Protection Component Swi3 PF01118:Semialdehyde dehydrogenase, NAD binding domain}
transcript_HQ_AA_transcript10136/f2p0/3365	{ABK24323.1; unknown [Picea sitchensis]}	{sp|Q9LJK3|LAG12_ARATH; LAG1 longevity assurance homolog 2 OS=Arabidopsis thaliana GN=LAG2 PE=1 SV=1}	{nnu:104606459; K04710 CERS ceramide synthetase 2.3.1.24 ko00600; Metabolism; Lipid metabolism; Sphingolipid metabolism | ko04071; Environmental Information Processing; Signal transduction; Sphingolipid signaling pathway}	{At3g19260; KOG1607 Protein transporter of the TRAM (translocating chain-associating membrane) superfamily U Intracellular trafficking, secretion, and vesicular transport ;}	{GO:0016021; integral to membrane; cellular_component}	{EF085015.1; Picea sitchensis clone WS0283_H23 unknown mRNA}	{PF03798:TLC domain}
transcript_HQ_AA_transcript10139/f2p0/3416	{XP_010267836.1; PREDICTED: uncharacterized protein LOC104604952 [Nelumbo nucifera]}	{NA}	{atr:18440970; - - - - -}	{NA}	{NA}	{BT106146.1; Picea glauca clone GQ02903_P04 mRNA sequence}	{NA}
transcript_HQ_AA_transcript10140/f2p0/3370	{XP_011627852.1; PREDICTED: probable E3 ubiquitin-protein ligase HIP1 isoform X2 [Amborella trichopoda]}	{sp|O49500|MBR2_ARATH; E3 ubiquitin-protein ligase MBR2 OS=Arabidopsis thaliana GN=MBR2 PE=1 SV=1}	{atr:18446288; K10635 RNF111 E3 ubiquitin-protein ligase Arkadia 2.3.2.27 -}	{At4g34040; KOG0800 FOG: Predicted E3 ubiquitin ligase O Posttranslational modification, protein turnover, chaperones ;}	{GO:0046872; metal ion binding; molecular_function GO:0005515; protein binding; molecular_function GO:0005680; anaphase-promoting complex; cellular_component GO:0008270; zinc ion binding; molecular_function GO:0004842; ubiquitin-protein ligase activity; molecular_function}	{BT115321.1; Picea glauca clone GQ03614_D03 mRNA sequence}	{PF12861:Anaphase-promoting complex subunit 11 RING-H2 finger PF00097:Zinc finger, C3HC4 type (RING finger) PF12906:RING-variant domain PF13639:Ring finger domain PF17123:RING-like zinc finger PF14634:zinc-RING finger domain PF12678:RING-H2 zinc finger domain}
transcript_HQ_AA_transcript10141/f2p0/3365	{ERM94555.1; hypothetical protein AMTR_s00010p00266870 [Amborella trichopoda]}	{sp|Q8H1U5|APC2_ARATH; Anaphase-promoting complex subunit 2 OS=Arabidopsis thaliana GN=APC2 PE=1 SV=1}	{egu:105038728; K03349 APC2 anaphase-promoting complex subunit 2 - ko04120; Genetic Information Processing; Folding, sorting and degradation; Ubiquitin mediated proteolysis | ko04110; Cellular Processes; Cell growth and death; Cell cycle | ko04111; Cellular Processes; Cell growth and death; Cell cycle - yeast | ko04113; Cellular Processes; Cell growth and death; Meiosis - yeast | ko04114; Cellula…	{At2g04660; KOG2165 Anaphase-promoting complex (APC), subunit 2 DO Cell cycle control, cell division, chromosome partitioning ; Posttranslational modification, protein turnover, chaperones ;}	{GO:0006511; ubiquitin-dependent protein catabolic process; biological_process GO:0031625; ubiquitin protein ligase binding; molecular_function}	{BT101594.1; Picea glauca clone GQ01308_J08 mRNA sequence}	{PF00888:Cullin family}
transcript_HQ_AA_transcript10146/f4p0/3375	{XP_010685628.1; PREDICTED: alpha-glucan phosphorylase, H isozyme [Beta vulgaris subsp. vulgaris]}	{sp|P32811|PHSH_SOLTU; Alpha-glucan phosphorylase, H isozyme OS=Solanum tuberosum PE=1 SV=1}	{egu:105046284; K00688 PYG, glgP glycogen phosphorylase 2.4.1.1 ko00500; Metabolism; Carbohydrate metabolism; Starch and sucrose metabolism | ko02026; Cellular Processes; Cellular community - prokaryotes; Biofilm formation - Escherichia coli | ko04910; Organismal Systems; Endocrine system; Insulin signaling pathway | ko04922; Organismal Systems; Endocrine system; Glucagon signaling pathway | ko04…	{At3g46970; KOG2099 Glycogen phosphorylase G Carbohydrate transport and metabolism ;}	{GO:0005975; carbohydrate metabolic process; biological_process GO:0008184; glycogen phosphorylase activity; molecular_function}	{BT119940.1; Picea glauca clone GQ04112_N08 mRNA sequence}	{PF00343:Carbohydrate phosphorylase}
transcript_HQ_AA_transcript10147/f2p0/3385	{NA}	{sp|P78617|TREA_EMENI; Acid trehalase OS=Emericella nidulans (strain FGSC A4 / ATCC 38163 / CBS 112.46 / NRRL 194 / M139) GN=treA PE=3 SV=1}	{NA}	{YPR026w; KOG4125 Acid trehalase G Carbohydrate transport and metabolism ;}	{GO:0003824; NA GO:0005975; carbohydrate metabolic process; biological_process}	{NA}	{PF03632:Glycosyl hydrolase family 65 central catalytic domain PF03636:Glycosyl hydrolase family 65, N-terminal domain }
transcript_HQ_AA_transcript10149/f2p0/3369	{XP_006399016.1; hypothetical protein EUTSA_v10012508mg [Eutrema salsugineum]}	{sp|Q12038|SRO7_YEAST; Lethal(2) giant larvae protein homolog SRO7 OS=Saccharomyces cerevisiae (strain ATCC 204508 / S288c) GN=SRO7 PE=1 SV=1}	{aly:ARALYDRAFT_487352; K08518 STXBP5, SRO7_77 syntaxin-binding protein 5 - -}	{YPR032w; KOG1983 Tomosyn and related SNARE-interacting proteins U Intracellular trafficking, secretion, and vesicular transport ;}	{GO:0005515; protein binding; molecular_function}	{NA}	{PF00400:WD domain, G-beta repeat}
transcript_HQ_AA_transcript1015/f2p0/5689	{XP_001769898.1; predicted protein [Physcomitrella patens]}	{sp|Q9FPT1|UBP12_ARATH; Ubiquitin carboxyl-terminal hydrolase 12 OS=Arabidopsis thaliana GN=UBP12 PE=2 SV=2}	{atr:18446935; - - - - -}	{At2g25320; KOG1987 Speckle-type POZ protein SPOP and related proteins with TRAF, MATH and BTB/POZ domains DR Cell cycle control, cell division, chromosome partitioning ; General function prediction only ;}	{GO:0006281; DNA repair; biological_process GO:0005515; protein binding; molecular_function}	{BT108081.1; Picea glauca clone GQ03116_K09 mRNA sequence}	{PF00917:MATH domain PF14631:Fanconi anaemia protein FancD2 nuclease}
transcript_HQ_AA_transcript10150/f2p0/3370	{XP_019052102.1; PREDICTED: uncharacterized protein LOC104590675 isoform X2 [Nelumbo nucifera]}	{NA}	{bvg:104890795; - - - - -}	{NA}	{NA}	{NA}	{NA}
transcript_HQ_AA_transcript10151/f2p0/3380	{XP_006851898.1; PREDICTED: tetratricopeptide repeat protein 27 homolog [Amborella trichopoda]}	{sp|Q54BW6|TTC27_DICDI; Tetratricopeptide repeat protein 27 homolog OS=Dictyostelium discoideum GN=ttc27 PE=3 SV=1}	{atr:18441610; - - - - -}	{At5g17270; KOG1128 Uncharacterized conserved protein, contains TPR repeats R General function prediction only ;}	{NA}	{AP010330.1; Lotus japonicus genomic DNA, chromosome 1, clone: LjT17D12, TM1794a, complete sequence}	{NA}
transcript_HQ_AA_transcript10156/f2p0/3401	{XP_011623525.1; PREDICTED: pentatricopeptide repeat-containing protein At5g13270, chloroplastic [Amborella trichopoda]}	{sp|Q9LYU9|PP378_ARATH; Pentatricopeptide repeat-containing protein At5g13270, chloroplastic OS=Arabidopsis thaliana GN=PCMP-H90 PE=2 SV=1}	{atr:18434353; - - - - -}	{At5g13270; KOG4197 FOG: PPR repeat R General function prediction only ;}	{GO:0004748; ribonucleoside-diphosphate reductase activity; molecular_function GO:0008270; zinc ion binding; molecular_function GO:0050897; cobalt ion binding; molecular_function GO:0055114; oxidation-reduction process; biological_process}	{XM_017780882.1; PREDICTED: Gossypium arboreum pentatricopeptide repeat-containing protein At3g12770 (LOC108478423), mRNA}	{PF08471:Class II vitamin B12-dependent ribonucleotide reductase PF14432:DYW family of nucleic acid deaminases}
transcript_HQ_AA_transcript10158/f8p0/3342	{XP_006854205.1; PREDICTED: protein ENHANCED DISEASE RESISTANCE 2 isoform X1 [Amborella trichopoda]}	{sp|F4JSE7|EDR2_ARATH; Protein ENHANCED DISEASE RESISTANCE 2 OS=Arabidopsis thaliana GN=EDR2 PE=2 SV=1}	{atr:18443964; - - - - -}	{NA}	{GO:0008289; lipid binding; molecular_function}	{BT116882.1; Picea glauca clone GQ03808_I12 mRNA sequence}	{PF01852:START domain}
transcript_HQ_AA_transcript1016/f3p0/5688	{NA}	{NA}	{NA}	{NA}	{NA}	{NA}	{NA}
transcript_HQ_AA_transcript10162/f3p0/3368	{XP_010260590.1; PREDICTED: probable protein S-acyltransferase 19 [Nelumbo nucifera]}	{sp|Q8L5Y5|ZDH17_ARATH; Probable protein S-acyltransferase 19 OS=Arabidopsis thaliana GN=PAT19 PE=2 SV=1}	{nnu:104599666; K20027 ZDHHC1_11 palmitoyltransferase ZDHHC1/11 2.3.1.225 -}	{At4g15080; KOG1311 DHHC-type Zn-finger proteins R General function prediction only ;}	{NA}	{BT102864.1; Picea glauca clone GQ0201_O13 mRNA sequence}	{NA}
transcript_HQ_AA_transcript10168/f2p0/3378	{XP_006826692.1; PREDICTED: QWRF motif-containing protein 2 [Amborella trichopoda]}	{sp|Q94AI1|QWRF2_ARATH; QWRF motif-containing protein 2 OS=Arabidopsis thaliana GN=QWRF2 PE=2 SV=1}	{nnu:104608103; - - - - -}	{NA}	{NA}	{NA}	{NA}
transcript_HQ_AA_transcript10169/f2p0/3362	{ABK24854.1; unknown [Picea sitchensis]}	{sp|Q9Y2E6|DTX4_HUMAN; E3 ubiquitin-protein ligase DTX4 OS=Homo sapiens GN=DTX4 PE=1 SV=2}	{thj:104825169; K10664 ATL6S E3 ubiquitin-protein ligase ATL6/9/15/31/42/55 2.3.2.27 -}	{NA}	{GO:0004842; ubiquitin-protein ligase activity; molecular_function GO:0061630; NA GO:0005680; anaphase-promoting complex; cellular_component GO:0008270; zinc ion binding; molecular_function GO:0005515; protein binding; molecular_function GO:0046872; metal ion binding; molecular_function}	{NA}	{PF14634:zinc-RING finger domain PF12906:RING-variant domain PF00628:PHD-finger PF17123:RING-like zinc finger PF12861:Anaphase-promoting complex subunit 11 RING-H2 finger PF16685:zinc RING finger of MSL2 PF00097:Zinc finger, C3HC4 type (RING finger) PF11789:Zinc-finger of the MIZ type in Nse subunit PF12678:RING-H2 zinc finger domain PF13639:Ring finger domain}
transcript_HQ_AA_transcript10175/f2p0/3373	{GAV63096.1; WD40 domain-containing protein [Cephalotus follicularis]}	{sp|Q9C0C7|AMRA1_HUMAN; Activating molecule in BECN1-regulated autophagy protein 1 OS=Homo sapiens GN=AMBRA1 PE=1 SV=2}	{gra:105798577; K17985 AMBRA1 activating molecule in BECN1-regulated autophagy protein 1 - ko04140; Cellular Processes; Transport and catabolism; Autophagy - animal}	{At5g43930; KOG0266 WD40 repeat-containing protein R General function prediction only ;}	{GO:0005515; protein binding; molecular_function}	{BT114479.1; Picea glauca clone GQ03515_F06 mRNA sequence}	{PF00400:WD domain, G-beta repeat}
transcript_HQ_AA_transcript10177/f4p0/3338	{GAQ90703.1; hypothetical protein KFL_006760020 [Klebsormidium flaccidum]}	{sp|S0DXJ2|FUB8_GIBF5; Non-canonical non-ribosomal peptide synthetase FUB8 OS=Gibberella fujikuroi (strain CBS 195.34 / IMI 58289 / NRRL A-6831) GN=FUB8 PE=1 SV=1}	{ota:Ot18g00670; - - - - -}	{At3g21230; KOG1176 Acyl-CoA synthetase I Lipid transport and metabolism ;}	{GO:0003824; NA GO:0050662; coenzyme binding; molecular_function GO:0008152; NA}	{NA}	{PF00501:AMP-binding enzyme PF01370:NAD dependent epimerase/dehydratase family}
transcript_HQ_AA_transcript10179/f3p0/3358	{ABR16103.1; unknown [Picea sitchensis]}	{sp|Q9SZA7|DRL29_ARATH; Probable disease resistance protein At4g33300 OS=Arabidopsis thaliana GN=At4g33300 PE=2 SV=3}	{ats:F775_07053; - - - - -}	{NA}	{GO:0043531; ADP binding; molecular_function GO:0005515; protein binding; molecular_function}	{BT114331.1; Picea glauca clone GQ03512_J05 mRNA sequence}	{PF00931:NB-ARC domain PF00560:Leucine Rich Repeat PF13855:Leucine rich repeat}
transcript_HQ_AA_transcript10182/f2p0/3369	{XP_006826692.1; PREDICTED: QWRF motif-containing protein 2 [Amborella trichopoda]}	{sp|Q94AI1|QWRF2_ARATH; QWRF motif-containing protein 2 OS=Arabidopsis thaliana GN=QWRF2 PE=2 SV=1}	{nnu:104608103; - - - - -}	{NA}	{NA}	{NA}	{NA}
transcript_HQ_AA_transcript10184/f2p0/3376	{ADE75869.1; unknown [Picea sitchensis]}	{sp|Q6L4R7|P2C53_ORYSJ; Probable protein phosphatase 2C 53 OS=Oryza sativa subsp. japonica GN=Os05g0592800 PE=2 SV=1}	{atr:18444235; K14497 PP2C protein phosphatase 2C 3.1.3.16 ko04016; Environmental Information Processing; Signal transduction; MAPK signaling pathway - plant | ko04075; Environmental Information Processing; Signal transduction; Plant hormone signal transduction | ko04931; Human Diseases; Endocrine and metabolic diseases; Insulin resistance}	{At4g26080; KOG0698 Serine/threonine protein phosphatase T Signal transduction mechanisms ;}	{GO:0003824; NA}	{BT122495.1; Picea sitchensis clone WS0452_B01 unknown mRNA}	{PF00481:Protein phosphatase 2C}
transcript_HQ_AA_transcript10187/f2p0/3381	{ABR16103.1; unknown [Picea sitchensis]}	{sp|Q9SZA7|DRL29_ARATH; Probable disease resistance protein At4g33300 OS=Arabidopsis thaliana GN=At4g33300 PE=2 SV=3}	{bvg:104899032; - - - - -}	{NA}	{GO:0043531; ADP binding; molecular_function}	{BT114331.1; Picea glauca clone GQ03512_J05 mRNA sequence}	{PF00931:NB-ARC domain}
transcript_HQ_AA_transcript10189/f3p0/3366	{XP_006851901.1; PREDICTED: trihelix transcription factor GTL1 isoform X1 [Amborella trichopoda]}	{sp|Q9C882|GTL1_ARATH; Trihelix transcription factor GTL1 OS=Arabidopsis thaliana GN=GTL1 PE=1 SV=2}	{atr:18441613; - - - - -}	{At1g33240; KOG4282 Transcription factor GT-2 and related proteins, contains trihelix DNA-binding/SANT domain K Transcription ;}	{NA}	{XM_018826494.1; PREDICTED: Musa acuminata subsp. malaccensis trihelix transcription factor GTL1-like (LOC103985715), transcript variant X3, mRNA}	{NA}
transcript_HQ_AA_transcript10190/f2p0/3373	{ERN02039.1; hypothetical protein AMTR_s00045p00120010 [Amborella trichopoda]}	{sp|B2ZFP3|SMAL1_DANRE; SWI/SNF-related matrix-associated actin-dependent regulator of chromatin subfamily A-like protein 1 OS=Danio rerio GN=smarcal1 PE=2 SV=1}	{sind:105158701; K14440 SMARCAL1, HARP SWI/SNF-related matrix-associated actin-dependent regulator of chromatin subfamily A-like protein 1 3.6.4.12 -}	{At1g48310; KOG1000 Chromatin remodeling protein HARP/SMARCAL1, DEAD-box superfamily B Chromatin structure and dynamics ;}	{GO:0003677; DNA binding; molecular_function GO:0005524; ATP binding; molecular_function GO:0016787; hydrolase activity; molecular_function}	{XM_008225273.2; PREDICTED: Prunus mume SWI/SNF-related matrix-associated actin-dependent regulator of chromatin subfamily A-like protein 1 (LOC103323288), transcript variant X1, mRNA}	{PF00176:SNF2 family N-terminal domain PF04851:Type III restriction enzyme, res subunit}
transcript_HQ_AA_transcript10194/f4p0/3362	{XP_020109735.1; glutamate receptor 3.4-like isoform X1 [Ananas comosus]}	{sp|Q9SW97|GLR35_ARATH; Glutamate receptor 3.5 OS=Arabidopsis thaliana GN=GLR3.5 PE=2 SV=2}	{smo:SELMODRAFT_102172; K05387 GRIP glutamate receptor, ionotropic, plant - -}	{At2g32390; KOG1052 Glutamate-gated kainate-type ion channel receptor subunit GluR5 and related subunits PET Inorganic ion transport and metabolism ; Amino acid transport and metabolism ; Signal transduction mechanisms ;}	{NA}	{NA}	{NA}
transcript_HQ_AA_transcript10197/f15p0/3349	{ABR18001.1; unknown [Picea sitchensis]}	{sp|Q7XPY2|PMA1_ORYSJ; Plasma membrane ATPase OS=Oryza sativa subsp. japonica GN=Os04g0656100 PE=2 SV=1}	{pda:103701528; K01535 PMA1, PMA2 H+-transporting ATPase 3.6.3.6 ko00190; Metabolism; Energy metabolism; Oxidative phosphorylation}	{At2g18960; KOG0205 Plasma membrane H+-transporting ATPase P Inorganic ion transport and metabolism ;}	{GO:0046872; metal ion binding; molecular_function GO:0000166; nucleotide binding; molecular_function}	{EF678233.1; Picea sitchensis clone WS0286_C22 unknown mRNA}	{PF00122:E1-E2 ATPase}
transcript_HQ_AA_transcript10203/f2p0/3371	{BAD67155.1; PpPPR_98 [Physcomitrella patens]}	{sp|Q9SVP7|PP307_ARATH; Pentatricopeptide repeat-containing protein At4g13650 OS=Arabidopsis thaliana GN=PCMP-H42 PE=2 SV=2}	{atr:105421361; - - - - -}	{At4g13650; KOG4197 FOG: PPR repeat R General function prediction only ;}	{GO:0008270; zinc ion binding; molecular_function GO:0016192; vesicle-mediated transport; biological_process GO:0045182; NA GO:0006886; intracellular protein transport; biological_process GO:0006417; regulation of translation; biological_process}	{BT105283.1; Picea glauca clone GQ02820_I07 mRNA sequence}	{PF17049:ATPase expression protein 1 PF00637:Region in Clathrin and VPS PF14432:DYW family of nucleic acid deaminases}
transcript_HQ_AA_transcript10206/f2p0/3366	{ADE76045.1; unknown [Picea sitchensis]}	{NA}	{lja:Lj0g3v0178669.1; - - - - -}	{NA}	{NA}	{BT122677.1; Picea sitchensis clone WS0454_B07 unknown mRNA}	{NA}
transcript_HQ_AA_transcript10207/f2p0/3387	{OAE19028.1; hypothetical protein AXG93_2839s1240 [Marchantia polymorpha subsp. polymorpha]}	{sp|Q6F3I7|DAP4_PSEMX; Dipeptidyl aminopeptidase 4 OS=Pseudoxanthomonas mexicana GN=dap4 PE=1 SV=1}	{cic:CICLE_v10018947mg; K01278 DPP4, CD26 dipeptidyl-peptidase 4 3.4.14.5 ko04974; Organismal Systems; Digestive system; Protein digestion and absorption}	{At5g24260; KOG2281 Dipeptidyl aminopeptidases/acylaminoacyl-peptidases O Posttranslational modification, protein turnover, chaperones ;}	{GO:0006508; proteolysis; biological_process}	{BT115676.1; Picea glauca clone GQ03704_D09 mRNA sequence}	{PF00930:Dipeptidyl peptidase IV (DPP IV) N-terminal region}
transcript_HQ_AA_transcript10210/f3p0/3321	{XP_019190516.1; PREDICTED: probable E3 ubiquitin-protein ligase RHA1A [Ipomoea nil]}	{sp|Q9P7E1|YOF7_SCHPO; Uncharacterized RING finger protein P4H10.07 OS=Schizosaccharomyces pombe (strain 972 / ATCC 24843) GN=SPBP4H10.07 PE=1 SV=1}	{ini:109184972; K16281 RHA1 RING-H2 zinc finger protein RHA1 - -}	{SPBP4H10.07; KOG0800 FOG: Predicted E3 ubiquitin ligase O Posttranslational modification, protein turnover, chaperones ;}	{GO:0004842; ubiquitin-protein ligase activity; molecular_function GO:0005515; protein binding; molecular_function GO:0046872; metal ion binding; molecular_function GO:0005680; anaphase-promoting complex; cellular_component GO:0008270; zinc ion binding; molecular_function}	{NA}	{PF12906:RING-variant domain PF17123:RING-like zinc finger PF00628:PHD-finger PF14634:zinc-RING finger domain PF17122:Zinc-finger PF13639:Ring finger domain PF11789:Zinc-finger of the MIZ type in Nse subunit PF12678:RING-H2 zinc finger domain PF17121:Zinc finger, C3HC4 type (RING finger) PF12861:Anaphase-promoting complex subunit 11 RING-H2 finger PF00097:Zinc finger, C3HC4 type (RING finger)}
transcript_HQ_AA_transcript10216/f2p0/3388	{XP_011620925.1; PREDICTED: nuclear pore complex protein NUP133 isoform X2 [Amborella trichopoda]}	{sp|F4IGA5|NU133_ARATH; Nuclear pore complex protein NUP133 OS=Arabidopsis thaliana GN=NUP133 PE=1 SV=1}	{nnu:104594209; K14300 NUP133 nuclear pore complex protein Nup133 - ko03013; Genetic Information Processing; Translation; RNA transport}	{NA}	{GO:0006810; transport; biological_process GO:0005215; NA GO:0016020; membrane; cellular_component}	{NA}	{PF00873:AcrB/AcrD/AcrF family}
transcript_HQ_AA_transcript10217/f3p0/3360	{NA}	{NA}	{NA}	{NA}	{NA}	{NA}	{NA}
transcript_HQ_AA_transcript10219/f3p0/3374	{XP_011028627.1; PREDICTED: U-box domain-containing protein 38 [Populus euphratica]}	{sp|Q0WUF6|PUB41_ARATH; U-box domain-containing protein 41 OS=Arabidopsis thaliana GN=PUB41 PE=2 SV=1}	{nnu:104595814; - - - - -}	{NA}	{GO:0016567; protein ubiquitination; biological_process GO:0004842; ubiquitin-protein ligase activity; molecular_function GO:0005515; protein binding; molecular_function}	{BT116625.1; Picea glauca clone GQ03803_I20 mRNA sequence}	{PF00514:Armadillo/beta-catenin-like repeat PF04564:U-box domain}
transcript_HQ_AA_transcript1022/f2p0/5672	{XP_010252790.1; PREDICTED: E3 ubiquitin-protein ligase UPL1-like [Nelumbo nucifera]}	{sp|Q8GY23|UPL1_ARATH; E3 ubiquitin-protein ligase UPL1 OS=Arabidopsis thaliana GN=UPL1 PE=1 SV=3}	{nnu:104594266; K10592 HUWE1, MULE, ARF-BP1 E3 ubiquitin-protein ligase HUWE1 2.3.2.26 ko04120; Genetic Information Processing; Folding, sorting and degradation; Ubiquitin mediated proteolysis}	{At1g70320; KOG0939 E3 ubiquitin-protein ligase/Putative upstream regulatory element binding protein OK Posttranslational modification, protein turnover, chaperones ; Transcription ;}	{GO:0005515; protein binding; molecular_function}	{XM_010245654.2; PREDICTED: Nelumbo nucifera E3 ubiquitin-protein ligase UPL1-like (LOC104587890), transcript variant X4, mRNA}	{PF00514:Armadillo/beta-catenin-like repeat PF02985:HEAT repeat}
transcript_HQ_AA_transcript10222/f2p0/3360	{NA}	{NA}	{NA}	{NA}	{NA}	{NA}	{NA}
transcript_HQ_AA_transcript10223/f7p0/3339	{XP_006854485.2; PREDICTED: TSL-kinase interacting protein 1 [Amborella trichopoda]}	{sp|Q8LJT8|TKI1_ARATH; TSL-kinase interacting protein 1 OS=Arabidopsis thaliana GN=TKI1 PE=1 SV=2}	{atr:18444250; - - - - -}	{At2g36960; KOG4468 Polycomb-group transcriptional regulator K Transcription ;}	{NA}	{NA}	{NA}
transcript_HQ_AA_transcript10227/f3p0/3357	{ABR17308.1; unknown [Picea sitchensis]}	{sp|Q9ZVH4|CUL3A_ARATH; Cullin-3A OS=Arabidopsis thaliana GN=CUL3A PE=1 SV=1}	{nnu:104597343; K03869 CUL3 cullin 3 - ko04120; Genetic Information Processing; Folding, sorting and degradation; Ubiquitin mediated proteolysis | ko04340; Environmental Information Processing; Signal transduction; Hedgehog signaling pathway | ko04341; Environmental Information Processing; Signal transduction; Hedgehog signaling pathway - fly}	{At1g26830; KOG2166 Cullins D Cell cycle control, cell division, chromosome partitioning ;}	{GO:0006511; ubiquitin-dependent protein catabolic process; biological_process GO:0031625; ubiquitin protein ligase binding; molecular_function}	{XM_012212233.1; PREDICTED: Jatropha curcas cullin-3A (LOC105630423), mRNA}	{PF00888:Cullin family}
transcript_HQ_AA_transcript1023/f2p0/5687	{XP_002263027.3; PREDICTED: helicase-like transcription factor CHR28 isoform X1 [Vitis vinifera]}	{sp|Q94BR5|CHR28_ARATH; Helicase-like transcription factor CHR28 OS=Arabidopsis thaliana GN=CHR28 PE=1 SV=1}	{vvi:100265351; - - - - -}	{At1g61140; KOG1001 Helicase-like transcription factor HLTF/DNA helicase RAD5, DEAD-box superfamily KL Transcription ; Replication, recombination and repair ;}	{GO:0005515; protein binding; molecular_function GO:0046872; metal ion binding; molecular_function GO:0008270; zinc ion binding; molecular_function GO:0005524; ATP binding; molecular_function GO:0003676; nucleic acid binding; molecular_function}	{XM_011097967.1; PREDICTED: Sesamum indicum putative SWI/SNF-related matrix-associated actin-dependent regulator of chromatin subfamily A member 3-like 1 (LOC105175513), transcript variant X2, mRNA}	{PF00097:Zinc finger, C3HC4 type (RING finger) PF00176:SNF2 family N-terminal domain PF13639:Ring finger domain PF00270:DEAD/DEAH box helicase PF14634:zinc-RING finger domain}
transcript_HQ_AA_transcript10230/f5p0/3339	{BAK02010.1; predicted protein [Hordeum vulgare subsp. vulgare]}	{sp|O74189|PMT1_CANAL; Dolichyl-phosphate-mannose--protein mannosyltransferase 1 OS=Candida albicans (strain SC5314 / ATCC MYA-2876) GN=PMT1 PE=2 SV=1}	{cme:CYME_CMR221C; K00728 POMT dolichyl-phosphate-mannose-protein mannosyltransferase 2.4.1.109 ko00515; Metabolism; Glycan biosynthesis and metabolism; Mannose type O-glycan biosynthesis | ko00514; Metabolism; Glycan biosynthesis and metabolism; Other types of O-glycan biosynthesis}	{YDL095w; KOG3359 Dolichyl-phosphate-mannose:protein O-mannosyl transferase O Posttranslational modification, protein turnover, chaperones ;}	{GO:0000030; mannosyltransferase activity; molecular_function GO:0006493; protein O-linked glycosylation; biological_process GO:0016020; membrane; cellular_component}	{NA}	{PF02815:MIR domain PF02366:Dolichyl-phosphate-mannose-protein mannosyltransferase }
transcript_HQ_AA_transcript10234/f2p0/3460	{XP_006851902.1; PREDICTED: sphingoid long-chain bases kinase 1 [Amborella trichopoda]}	{sp|Q9LRB0|LCBK1_ARATH; Sphingoid long-chain bases kinase 1 OS=Arabidopsis thaliana GN=LCBK1 PE=1 SV=1}	{atr:18441614; - - - - -}	{At5g23450; KOG1116 Sphingosine kinase, involved in sphingolipid metabolism IT Lipid transport and metabolism ; Signal transduction mechanisms ;}	{GO:0016301; kinase activity; molecular_function}	{BT124596.1; Picea sitchensis clone WS0475_H24 unknown mRNA}	{PF00781:Diacylglycerol kinase catalytic domain}
transcript_HQ_AA_transcript10236/f2p0/3367	{XP_015884214.1; PREDICTED: uncharacterized protein slr1919 [Ziziphus jujuba]}	{sp|Q55680|Y005_SYNY3; Uncharacterized protein sll0005 OS=Synechocystis sp. (strain PCC 6803 / Kazusa) GN=sll0005 PE=3 SV=1}	{sind:105163105; K08869 ADCK, ABC1 aarF domain-containing kinase - -}	{At5g24970; KOG1235 Predicted unusual protein kinase R General function prediction only ;}	{NA}	{BT110691.1; Picea glauca clone GQ03226_F20 mRNA sequence}	{NA}
transcript_HQ_AA_transcript10239/f2p0/3355	{XP_006858463.1; PREDICTED: histidine--tRNA ligase [Amborella trichopoda]}	{sp|P93422|SYHC_ORYSJ; Histidine--tRNA ligase, cytoplasmic OS=Oryza sativa subsp. japonica GN=Os05g0150900 PE=2 SV=2}	{atr:18448331; K01892 HARS, hisS histidyl-tRNA synthetase 6.1.1.21 ko00970; Genetic Information Processing; Translation; Aminoacyl-tRNA biosynthesis}	{At3g02760; KOG1936 Histidyl-tRNA synthetase J Translation, ribosomal structure and biogenesis ;}	{GO:0006418; tRNA aminoacylation for protein translation; biological_process GO:0043039; tRNA aminoacylation; biological_process GO:0005524; ATP binding; molecular_function GO:0000049; tRNA binding; molecular_function GO:0000166; nucleotide binding; molecular_function GO:0004812; aminoacyl-tRNA ligase activity; molecular_function GO:0005737; cytoplasm; cellular_component}	{XM_006858401.2; PREDICTED: Amborella trichopoda histidine--tRNA ligase (LOC18448331), mRNA}	{PF00152:tRNA synthetases class II (D, K and N) PF01409:tRNA synthetases class II core domain (F)}
transcript_HQ_AA_transcript10241/f354p0/3268	{NA}	{NA}	{NA}	{NA}	{NA}	{NA}	{NA}
transcript_HQ_AA_transcript10243/f2p0/3400	{XP_011622632.1; PREDICTED: YTH domain-containing family protein 1 isoform X2 [Amborella trichopoda]}	{sp|P59326|YTHD1_MOUSE; YTH domain-containing family protein 1 OS=Mus musculus GN=Ythdf1 PE=1 SV=1}	{pxb:103964826; - - - - -}	{At3g13460; KOG1901 Uncharacterized high-glucose-regulated protein R General function prediction only ;}	{GO:0003723; RNA binding; molecular_function}	{XR_002163785.1; PREDICTED: Elaeis guineensis YTH domain-containing family protein 2 (LOC105036247), transcript variant X3, misc_RNA}	{PF04146:YT521-B-like domain}
transcript_HQ_AA_transcript10249/f2p0/3351	{XP_010251173.1; PREDICTED: protein NSP-INTERACTING KINASE 3 [Nelumbo nucifera]}	{sp|Q8RY65|NIK2_ARATH; Protein NSP-INTERACTING KINASE 2 OS=Arabidopsis thaliana GN=NIK2 PE=1 SV=1}	{nnu:104593152; - - - - -}	{NA}	{GO:0016021; integral to membrane; cellular_component GO:0006468; protein phosphorylation; biological_process GO:0005515; protein binding; molecular_function GO:0004672; protein kinase activity; molecular_function GO:0005524; ATP binding; molecular_function}	{HQ411145.1; Picea glauca isolate D821254-316 NSP-interacting kinase family protein gene, partial sequence}	{PF11770:GRB2-binding adapter (GAPT) PF00560:Leucine Rich Repeat PF13855:Leucine rich repeat PF07714:Protein tyrosine kinase PF13516:Leucine Rich repeat PF00069:Protein kinase domain}
transcript_HQ_AA_transcript10252/f2p0/3369	{XP_011626624.1; PREDICTED: LOW QUALITY PROTEIN: G-type lectin S-receptor-like serine/threonine-protein kinase At5g35370 [Amborella trichopoda]}	{sp|O65238|Y5537_ARATH; G-type lectin S-receptor-like serine/threonine-protein kinase At5g35370 OS=Arabidopsis thaliana GN=At5g35370 PE=2 SV=2}	{pop:POPTR_0002s08700g; - - - - -}	{NA}	{NA}	{NA}	{NA}
transcript_HQ_AA_transcript10259/f2p0/3358	{ABR18468.1; unknown [Picea sitchensis]}	{sp|Q9ZT42|RHF2A_ARATH; E3 ubiquitin-protein ligase RHF2A OS=Arabidopsis thaliana GN=RHF2A PE=2 SV=1}	{nnu:104586734; K19043 RHF E3 ubiquitin-protein ligase RHF 2.3.2.27 -}	{At4g14220; KOG0800 FOG: Predicted E3 ubiquitin ligase O Posttranslational modification, protein turnover, chaperones ;}	{NA}	{EF678741.1; Picea sitchensis clone WS0299_C14 unknown mRNA}	{NA}
transcript_HQ_AA_transcript1026/f2p0/5732	{XP_010268580.1; PREDICTED: systemin receptor SR160-like [Nelumbo nucifera]}	{sp|Q8L899|BRI1_SOLPE; Systemin receptor SR160 OS=Solanum peruvianum PE=1 SV=1}	{gra:105787882; K13415 BRI1 protein brassinosteroid insensitive 1 [EC:2.7.10.1 2.7.11.1] 2.7.10.1,2.7.11.1 ko04075; Environmental Information Processing; Signal transduction; Plant hormone signal transduction}	{NA}	{GO:0005524; ATP binding; molecular_function GO:0004672; protein kinase activity; molecular_function GO:0006468; protein phosphorylation; biological_process GO:0005515; protein binding; molecular_function}	{XM_010270278.2; PREDICTED: Nelumbo nucifera systemin receptor SR160-like (LOC104605494), mRNA}	{PF13516:Leucine Rich repeat PF00069:Protein kinase domain PF00560:Leucine Rich Repeat PF13855:Leucine rich repeat PF07714:Protein tyrosine kinase}
transcript_HQ_AA_transcript10262/f2p0/3389	{XP_010265829.1; PREDICTED: FT-interacting protein 1-like [Nelumbo nucifera]}	{sp|Q9FL59|FTIP1_ARATH; FT-interacting protein 1 OS=Arabidopsis thaliana GN=FTIP1 PE=1 SV=1}	{pda:103705378; - - - - -}	{NA}	{GO:0005515; protein binding; molecular_function}	{XM_010059666.2; PREDICTED: Eucalyptus grandis FT-interacting protein 1 (LOC104445729), transcript variant X3, mRNA}	{PF00168:C2 domain}
transcript_HQ_AA_transcript10263/f2p0/3377	{ABR18140.1; unknown [Picea sitchensis]}	{sp|Q9SQ64|COR2_PAPSO; Non-functional NADPH-dependent codeinone reductase 2 OS=Papaver somniferum GN=COR2 PE=1 SV=1}	{atr:18439246; - - - - -}	{At3g53880; KOG1577 Aldo/keto reductase family proteins R General function prediction only ;}	{NA}	{XM_012217002.1; PREDICTED: Jatropha curcas non-functional NADPH-dependent codeinone reductase 2-like (LOC105634183), mRNA}	{NA}
transcript_HQ_AA_transcript10264/f2p0/3359	{XP_010265279.1; PREDICTED: DNA mismatch repair protein MSH2 [Nelumbo nucifera]}	{sp|O24617|MSH2_ARATH; DNA mismatch repair protein MSH2 OS=Arabidopsis thaliana GN=MSH2 PE=1 SV=1}	{atr:18433612; K08735 MSH2 DNA mismatch repair protein MSH2 - ko03430; Genetic Information Processing; Replication and repair; Mismatch repair | ko05200; Human Diseases; Cancers: Overview; Pathways in cancer | ko05210; Human Diseases; Cancers: Specific types; Colorectal cancer | ko01524; Human Diseases; Drug resistance: Antineoplastic; Platinum drug resistance}	{Hs4557761; KOG0219 Mismatch repair ATPase MSH2 (MutS family) L Replication, recombination and repair ;}	{GO:0009318; exodeoxyribonuclease VII complex; cellular_component GO:0008855; exodeoxyribonuclease VII activity; molecular_function GO:0006298; mismatch repair; biological_process GO:0005524; ATP binding; molecular_function GO:0006308; DNA catabolic process; biological_process GO:0030983; mismatched DNA binding; molecular_function}	{XM_006843695.2; PREDICTED: Amborella trichopoda DNA mismatch repair protein MSH2 (LOC18433612), mRNA}	{PF01624:MutS domain I PF02609:Exonuclease VII small subunit PF00488:MutS domain V PF05190:MutS family domain IV PF05192:MutS domain III PF05188:MutS domain II}
transcript_HQ_AA_transcript10270/f2p0/3364	{ABK24538.1; unknown [Picea sitchensis]}	{sp|O65282|CH20_ARATH; 20 kDa chaperonin, chloroplastic OS=Arabidopsis thaliana GN=CPN20 PE=1 SV=2}	{aip:107630515; K04078 groES, HSPE1 chaperonin GroES - -}	{At5g20720; KOG1641 Mitochondrial chaperonin O Posttranslational modification, protein turnover, chaperones ;}	{GO:0006457; protein folding; biological_process GO:0005737; cytoplasm; cellular_component}	{NA}	{PF00166:Chaperonin 10 Kd subunit}
transcript_HQ_AA_transcript10273/f2p0/3340	{XP_008678290.1; PREDICTED: beta-1,3-N-acetylglucosaminyltransferase radical fringe-like [Zea mays]}	{NA}	{fve:101295084; - - - - -}	{NA}	{GO:0016757; transferase activity, transferring glycosyl groups; molecular_function GO:0016020; membrane; cellular_component}	{NA}	{PF02434:Fringe-like}
transcript_HQ_AA_transcript10277/f2p0/3358	{NA}	{sp|Q59V88|RFX1_CANAL; Transcriptional regulator RFX1 OS=Candida albicans (strain SC5314 / ATCC MYA-2876) GN=RFX1 PE=2 SV=1}	{NA}	{SPAC3G9.14; KOG3712 RFX family transcription factor K Transcription ;}	{GO:0006355; regulation of transcription, DNA-dependent; biological_process GO:0003677; DNA binding; molecular_function}	{NA}	{PF02257:RFX DNA-binding domain}
transcript_HQ_AA_transcript10279/f2p0/3350	{XP_006842160.1; PREDICTED: ABC transporter A family member 7 [Amborella trichopoda]}	{sp|Q9STT5|AB7A_ARATH; ABC transporter A family member 7 OS=Arabidopsis thaliana GN=ABCA7 PE=3 SV=2}	{nnu:104597061; - - - - -}	{At3g47780; KOG0059 Lipid exporter ABCA1 and related proteins, ABC superfamily IR Lipid transport and metabolism ; General function prediction only ;}	{GO:0016887; ATPase activity; molecular_function GO:0005524; ATP binding; molecular_function}	{BT112929.1; Picea glauca clone GQ03322_N17 mRNA sequence}	{PF13304:AAA domain, putative AbiEii toxin, Type IV TA system PF00005:ABC transporter}
transcript_HQ_AA_transcript10282/f5p0/3360	{XP_006478426.1; PREDICTED: bifunctional aspartokinase/homoserine dehydrogenase 1, chloroplastic-like [Citrus sinensis]}	{sp|O81852|AKH2_ARATH; Bifunctional aspartokinase/homoserine dehydrogenase 2, chloroplastic OS=Arabidopsis thaliana GN=AKHSDH2 PE=1 SV=1}	{jcu:105637935; K12524 thrA bifunctional aspartokinase / homoserine dehydrogenase 1 [EC:2.7.2.4 1.1.1.3] 2.7.2.4,1.1.1.3 ko01230; Metabolism; Global and overview maps; Biosynthesis of amino acids | ko00260; Metabolism; Amino acid metabolism; Glycine, serine and threonine metabolism | ko00270; Metabolism; Amino acid metabolism; Cysteine and methionine metabolism | ko00300; Metabolism; Amino acid m…	{NA}	{GO:0050661; NADP binding; molecular_function GO:0055114; oxidation-reduction process; biological_process GO:0016597; amino acid binding; molecular_function GO:0008152; NA GO:0006520; cellular amino acid metabolic process; biological_process GO:0016491; oxidoreductase activity; molecular_function}	{XM_009399456.2; PREDICTED: Musa acuminata subsp. malaccensis bifunctional aspartokinase/homoserine dehydrogenase 1, chloroplastic (LOC103982514), mRNA}	{PF00742:Homoserine dehydrogenase PF01842:ACT domain PF03447:Homoserine dehydrogenase, NAD binding domain}
transcript_HQ_AA_transcript10283/f4p0/3316	{XP_006845732.1; PREDICTED: protein ROOT HAIR DEFECTIVE 3 homolog 1 [Amborella trichopoda]}	{sp|P93042|RHD3_ARATH; Protein ROOT HAIR DEFECTIVE 3 OS=Arabidopsis thaliana GN=RHD3 PE=1 SV=1}	{atr:18435626; - - - - -}	{At3g13870; KOG2203 GTP-binding protein R General function prediction only ;}	{GO:0003924; GTPase activity; molecular_function GO:0009055; NA GO:0020037; heme binding; molecular_function GO:0005506; iron ion binding; molecular_function GO:0005524; ATP binding; molecular_function GO:0005525; GTP binding; molecular_function GO:0016887; ATPase activity; molecular_function}	{XM_006845669.2; PREDICTED: Amborella trichopoda protein ROOT HAIR DEFECTIVE 3 homolog 1 (LOC18435626), mRNA}	{PF02263:Guanylate-binding protein, N-terminal domain PF01322:Cytochrome C' PF01637:ATPase domain predominantly from Archaea PF01926:50S ribosome-binding GTPase PF00005:ABC transporter}
transcript_HQ_AA_transcript10291/f2p0/3363	{XP_020094195.1; mechanosensitive ion channel protein 5-like [Ananas comosus]}	{sp|O74839|YC1B_SCHPO; Uncharacterized MscS family protein C1183.11 OS=Schizosaccharomyces pombe (strain 972 / ATCC 24843) GN=SPCC1183.11 PE=1 SV=1}	{smo:SELMODRAFT_103269; - - - - -}	{SPCC1183.11; KOG4629 Predicted mechanosensitive ion channel M Cell wall/membrane/envelope biogenesis ;}	{GO:0005509; calcium ion binding; molecular_function GO:0016020; membrane; cellular_component GO:0055085; transmembrane transport; biological_process}	{NA}	{PF00924:Mechanosensitive ion channel PF13202:EF hand PF13405:EF-hand domain PF00036:EF hand PF13499:EF-hand domain pair}
transcript_HQ_AA_transcript10295/f3p0/3349	{XP_008789499.1; PREDICTED: beta-adaptin-like protein C [Phoenix dactylifera]}	{sp|Q9SUS3|APBLB_ARATH; Beta-adaptin-like protein B OS=Arabidopsis thaliana GN=BETAB-AD PE=1 SV=1}	{pda:103706977; K12392 AP1B1 AP-1 complex subunit beta-1 - ko04142; Cellular Processes; Transport and catabolism; Lysosome}	{At4g11380; KOG1061 Vesicle coat complex AP-1/AP-2/AP-4, beta subunit U Intracellular trafficking, secretion, and vesicular transport ;}	{GO:0030131; clathrin adaptor complex; cellular_component GO:0005515; protein binding; molecular_function GO:0016192; vesicle-mediated transport; biological_process GO:0030117; membrane coat; cellular_component GO:0006886; intracellular protein transport; biological_process}	{EF677389.1; Picea sitchensis clone WS02766_P12 unknown mRNA}	{PF00514:Armadillo/beta-catenin-like repeat PF09066:Beta2-adaptin appendage, C-terminal sub-domain PF01602:Adaptin N terminal region PF02985:HEAT repeat PF02883:Adaptin C-terminal domain}
transcript_HQ_AA_transcript10298/f3p0/3385	{JAT51127.1; Sulfite reductase [NADPH] flavoprotein component [Anthurium amnicola]}	{sp|P39692|MET10_YEAST; Sulfite reductase [NADPH] flavoprotein component OS=Saccharomyces cerevisiae (strain ATCC 204508 / S288c) GN=MET10 PE=1 SV=2}	{ota:Ot01g04540; K00327 POR NADPH-ferrihemoprotein reductase 1.6.2.4 -}	{YFR030w; KOG1158 NADP/FAD dependent oxidoreductase C Energy production and conversion ;}	{GO:0016491; oxidoreductase activity; molecular_function GO:0016903; oxidoreductase activity, acting on the aldehyde or oxo group of donors; molecular_function GO:0055114; oxidation-reduction process; biological_process}	{NA}	{PF00175:Oxidoreductase NAD-binding domain PF00667:FAD binding domain PF01558:Pyruvate ferredoxin/flavodoxin oxidoreductase}
transcript_HQ_AA_transcript10300/f3p0/3383	{XP_008784586.1; PREDICTED: replication protein A 70 kDa DNA-binding subunit A-like [Phoenix dactylifera]}	{sp|F4JSG3|RFA1E_ARATH; Replication protein A 70 kDa DNA-binding subunit E OS=Arabidopsis thaliana GN=RPA1E PE=2 SV=1}	{pda:103703496; K07466 RFA1, RPA1, rpa replication factor A1 - ko03030; Genetic Information Processing; Replication and repair; DNA replication | ko03420; Genetic Information Processing; Replication and repair; Nucleotide excision repair | ko03430; Genetic Information Processing; Replication and repair; Mismatch repair | ko03440; Genetic Information Processing; Replication and repair; Homologous …	{At4g19130; KOG0851 Single-stranded DNA-binding replication protein A (RPA), large (70 kD) subunit and related ssDNA-binding proteins L Replication, recombination and repair ;}	{GO:0003676; nucleic acid binding; molecular_function GO:0003677; DNA binding; molecular_function GO:0008270; zinc ion binding; molecular_function GO:0006260; DNA replication; biological_process GO:0005634; nucleus; cellular_component}	{XM_009389246.2; PREDICTED: Musa acuminata subsp. malaccensis replication protein A 70 kDa DNA-binding subunit A (LOC103974419), transcript variant X2, mRNA}	{PF01336:OB-fold nucleic acid binding domain PF04057:Replication factor-A protein 1, N-terminal domain PF00098:Zinc knuckle}
transcript_HQ_AA_transcript10301/f4p0/3335	{ABK26987.1; unknown [Picea sitchensis]}	{sp|Q9FLD7|GT14A_ARATH; Beta-glucuronosyltransferase GlcAT14A OS=Arabidopsis thaliana GN=GLCAT14A PE=2 SV=1}	{atr:18436026; K20891 GLCAT14 beta-glucuronosyltransferase 2.4.1.- -}	{At5g39990; KOG0799 Branching enzyme G Carbohydrate transport and metabolism ;}	{GO:0008375; acetylglucosaminyltransferase activity; molecular_function GO:0016020; membrane; cellular_component}	{BT107461.1; Picea glauca clone GQ03107_N03 mRNA sequence}	{PF02485:Core-2/I-Branching enzyme}
transcript_HQ_AA_transcript10304/f2p0/3370	{XP_006836804.1; PREDICTED: probable serine/threonine-protein kinase At1g54610 [Amborella trichopoda]}	{sp|F4I114|Y1960_ARATH; Probable serine/threonine-protein kinase At1g09600 OS=Arabidopsis thaliana GN=At1g09600 PE=3 SV=1}	{pop:POPTR_0001s41040g; - - - - -}	{At1g53050; KOG0600 Cdc2-related protein kinase D Cell cycle control, cell division, chromosome partitioning ;}	{GO:0005524; ATP binding; molecular_function GO:0006468; protein phosphorylation; biological_process GO:0004672; protein kinase activity; molecular_function}	{XM_008228407.2; PREDICTED: Prunus mume probable serine/threonine-protein kinase At1g54610 (LOC103326205), mRNA}	{PF07714:Protein tyrosine kinase PF00069:Protein kinase domain}
transcript_HQ_AA_transcript10306/f4p0/3302	{XP_006857125.1; PREDICTED: cirhin isoform X1 [Amborella trichopoda]}	{sp|Q8R2N2|UTP4_MOUSE; U3 small nucleolar RNA-associated protein 4 homolog OS=Mus musculus GN=Utp4 PE=2 SV=3}	{atr:18446959; K14548 UTP4, CIRH1A U3 small nucleolar RNA-associated protein 4 - ko03008; Genetic Information Processing; Translation; Ribosome biogenesis in eukaryotes}	{At1g27470; KOG2048 WD40 repeat protein R General function prediction only ;}	{GO:0005515; protein binding; molecular_function}	{NA}	{PF00400:WD domain, G-beta repeat}
transcript_HQ_AA_transcript10307/f4p0/3369	{XP_009406006.1; PREDICTED: uncharacterized protein LOC103989008 isoform X2 [Musa acuminata subsp. malaccensis]}	{sp|Q4I7L0|HAT2_GIBZE; Histone acetyltransferase type B subunit 2 OS=Gibberella zeae (strain PH-1 / ATCC MYA-4620 / FGSC 9075 / NRRL 31084) GN=HAT2 PE=3 SV=2}	{mus:103996539; - - - - -}	{NA}	{GO:0005515; protein binding; molecular_function}	{BT107732.1; Picea glauca clone GQ03112_B03 mRNA sequence}	{PF13855:Leucine rich repeat PF00400:WD domain, G-beta repeat PF00560:Leucine Rich Repeat}
transcript_HQ_AA_transcript1031/f8p0/5666	{OAE31331.1; hypothetical protein AXG93_4510s1050 [Marchantia polymorpha subsp. polymorpha]}	{sp|Q9FPT1|UBP12_ARATH; Ubiquitin carboxyl-terminal hydrolase 12 OS=Arabidopsis thaliana GN=UBP12 PE=2 SV=2}	{nnu:104592509; - - - - -}	{At2g25320; KOG1987 Speckle-type POZ protein SPOP and related proteins with TRAF, MATH and BTB/POZ domains DR Cell cycle control, cell division, chromosome partitioning ; General function prediction only ;}	{GO:0019069; viral capsid assembly; biological_process GO:0006281; DNA repair; biological_process GO:0046806; viral scaffold; cellular_component GO:0016021; integral to membrane; cellular_component GO:0005515; protein binding; molecular_function}	{BT108081.1; Picea glauca clone GQ03116_K09 mRNA sequence}	{PF05478:Prominin PF14631:Fanconi anaemia protein FancD2 nuclease PF00917:MATH domain PF06810:Phage minor structural protein GP20}
transcript_HQ_AA_transcript10310/f2p0/3356	{GAQ90662.1; Cleavage and polyadenylation specificity factor 2 [Klebsormidium flaccidum]}	{sp|O74740|CFT2_SCHPO; Cleavage factor two protein 2 OS=Schizosaccharomyces pombe (strain 972 / ATCC 24843) GN=cft2 PE=1 SV=1}	{ccp:CHC_T00010199001; K14402 CPSF2, CFT2 cleavage and polyadenylation specificity factor subunit 2 - ko03015; Genetic Information Processing; Translation; mRNA surveillance pathway}	{SPBC1709.15c; KOG1135 mRNA cleavage and polyadenylation factor II complex, subunit CFT2 (CPSF subunit) A RNA processing and modification ;}	{NA}	{NA}	{NA}
transcript_HQ_AA_transcript10315/f3p0/3379	{XP_002983682.1; hypothetical protein SELMODRAFT_118690 [Selaginella moellendorffii]}	{sp|Q9ZVT9|C2GR1_ARATH; C2 and GRAM domain-containing protein At1g03370 OS=Arabidopsis thaliana GN=At1g03370 PE=2 SV=4}	{smo:SELMODRAFT_235662; - - - - -}	{At1g03370_2; KOG1032 Uncharacterized conserved protein, contains GRAM domain S Function unknown ;}	{GO:0005515; protein binding; molecular_function}	{BT118187.1; Picea glauca clone GQ04003_F24 mRNA sequence}	{PF00168:C2 domain}
transcript_HQ_AA_transcript10317/f2p0/3368	{XP_002980073.1; hypothetical protein SELMODRAFT_153639 [Selaginella moellendorffii]}	{sp|O13651|SYIC_SCHPO; Isoleucine--tRNA ligase, cytoplasmic OS=Schizosaccharomyces pombe (strain 972 / ATCC 24843) GN=irs1 PE=3 SV=1}	{smo:SELMODRAFT_269269; K01870 IARS, ileS isoleucyl-tRNA synthetase 6.1.1.5 ko00970; Genetic Information Processing; Translation; Aminoacyl-tRNA biosynthesis}	{SPBC8D2.06; KOG0434 Isoleucyl-tRNA synthetase J Translation, ribosomal structure and biogenesis ;}	{GO:0006418; tRNA aminoacylation for protein translation; biological_process GO:0005524; ATP binding; molecular_function GO:0000166; nucleotide binding; molecular_function GO:0004812; aminoacyl-tRNA ligase activity; molecular_function}	{NA}	{PF09334:tRNA synthetases class I (M) PF08264:Anticodon-binding domain of tRNA PF00133:tRNA synthetases class I (I, L, M and V)}
transcript_HQ_AA_transcript10318/f3p0/3351	{XP_002278845.1; PREDICTED: mediator of RNA polymerase II transcription subunit 25 [Vitis vinifera]}	{sp|Q7XYY2|MED25_ARATH; Mediator of RNA polymerase II transcription subunit 25 OS=Arabidopsis thaliana GN=MED25 PE=1 SV=1}	{vvi:100259509; K15168 MED25 mediator of RNA polymerase II transcription subunit 25 - -}	{NA}	{GO:0004190; aspartic-type endopeptidase activity; molecular_function GO:0016021; integral to membrane; cellular_component GO:0008855; exodeoxyribonuclease VII activity; molecular_function GO:0016485; protein processing; biological_process GO:0016020; membrane; cellular_component GO:0009306; protein secretion; biological_process}	{BT108921.1; Picea glauca clone GQ03202_I16 mRNA sequence}	{PF01080:Presenilin PF00813:FliP family PF02601:Exonuclease VII, large subunit}
transcript_HQ_AA_transcript10319/f2p0/3391	{XP_010276256.1; PREDICTED: chaperone protein ClpB1 [Nelumbo nucifera]}	{sp|Q6F2Y7|CLPB1_ORYSJ; Chaperone protein ClpB1 OS=Oryza sativa subsp. japonica GN=CLPB1 PE=2 SV=1}	{egu:105040848; K03695 clpB ATP-dependent Clp protease ATP-binding subunit ClpB - ko04213; Organismal Systems; Aging; Longevity regulating pathway - multiple species}	{At1g74310; KOG1051 Chaperone HSP104 and related ATP-dependent Clp proteases O Posttranslational modification, protein turnover, chaperones ;}	{GO:0019538; protein metabolic process; biological_process GO:0005876; spindle microtubule; cellular_component GO:0051087; chaperone binding; molecular_function GO:0006914; autophagy; biological_process GO:0006310; DNA recombination; biological_process GO:0016887; ATPase activity; molecular_function GO:0005524; ATP binding; molecular_function GO:0007155; cell adhesion; biological_process GO:00088…	{BT119088.1; Picea glauca clone GQ04101_F06 mRNA sequence}	{PF02861:Clp amino terminal domain, pathogenicity island component PF04111:Autophagy protein Apg6 PF01025:GrpE PF02601:Exonuclease VII, large subunit PF08287:Spc19 PF00004:ATPase family associated with various cellular activities (AAA) PF01105:emp24/gp25L/p24 family/GOLD PF04504:Protein of unknown function, DUF573 PF05496:Holliday junction DNA helicase ruvB N-terminus PF07728:AAA domain (dynein-r…
transcript_HQ_AA_transcript10329/f2p0/3348	{XP_001417326.1; predicted protein [Ostreococcus lucimarinus CCE9901]}	{sp|O60161|UTP4_SCHPO; U3 small nucleolar RNA-associated protein 4 OS=Schizosaccharomyces pombe (strain 972 / ATCC 24843) GN=utp4 PE=3 SV=1}	{olu:OSTLU_31328; K14548 UTP4, CIRH1A U3 small nucleolar RNA-associated protein 4 - ko03008; Genetic Information Processing; Translation; Ribosome biogenesis in eukaryotes}	{SPBC19F5.02c; KOG2048 WD40 repeat protein R General function prediction only ;}	{GO:0005515; protein binding; molecular_function}	{NA}	{PF00400:WD domain, G-beta repeat}
transcript_HQ_AA_transcript10331/f3p0/3354	{XP_004497197.1; PREDICTED: transportin-1 [Cicer arietinum]}	{sp|O14089|IMB2_SCHPO; Importin subunit beta-2 OS=Schizosaccharomyces pombe (strain 972 / ATCC 24843) GN=kap104 PE=3 SV=1}	{cam:101504261; K18752 TNPO1, IPO2, KPNB2 transportin-1 - -}	{7295356; KOG2023 Nuclear transport receptor Karyopherin-beta2/Transportin (importin beta superfamily) YU Nuclear structure ; Intracellular trafficking, secretion, and vesicular transport ;}	{GO:0008536; Ran GTPase binding; molecular_function GO:0016192; vesicle-mediated transport; biological_process GO:0005515; protein binding; molecular_function GO:0006886; intracellular protein transport; biological_process GO:0030117; membrane coat; cellular_component}	{NA}	{PF02985:HEAT repeat PF01602:Adaptin N terminal region PF03810:Importin-beta N-terminal domain PF00514:Armadillo/beta-catenin-like repeat}
transcript_HQ_AA_transcript10334/f7p0/3336	{ABK26357.1; unknown [Picea sitchensis]}	{sp|Q9FLE8|Y5986_ARATH; Uncharacterized protein At5g39865 OS=Arabidopsis thaliana GN=At5g39865 PE=2 SV=1}	{nnu:104597131; K17479 GRXCR1 glutaredoxin domain-containing cysteine-rich protein 1 - -}	{At3g57070; KOG2824 Glutaredoxin-related protein O Posttranslational modification, protein turnover, chaperones ;}	{GO:0015035; protein disulfide oxidoreductase activity; molecular_function GO:0045454; cell redox homeostasis; biological_process GO:0009055; NA}	{XM_007215302.1; Prunus persica hypothetical protein (PRUPE_ppa005587mg) mRNA, complete cds}	{PF00462:Glutaredoxin}
transcript_HQ_AA_transcript10335/f2p0/3369	{XP_006857187.1; PREDICTED: probable glucan 1,3-alpha-glucosidase [Amborella trichopoda]}	{sp|Q9FN05|PSL5_ARATH; Probable glucan 1,3-alpha-glucosidase OS=Arabidopsis thaliana GN=PSL5 PE=1 SV=1}	{atr:18447023; K05546 GANAB alpha 1,3-glucosidase 3.2.1.84 ko00510; Metabolism; Glycan biosynthesis and metabolism; N-Glycan biosynthesis | ko04141; Genetic Information Processing; Folding, sorting and degradation; Protein processing in endoplasmic reticulum}	{At5g63840; KOG1066 Glucosidase II catalytic (alpha) subunit and related enzymes, glycosyl hydrolase family 31 GMO Carbohydrate transport and metabolism ; Cell wall/membrane/envelope biogenesis ; Posttranslational modification, protein turnover, chaperones ;}	{GO:0005975; carbohydrate metabolic process; biological_process GO:0004553; hydrolase activity, hydrolyzing O-glycosyl compounds; molecular_function}	{BT103712.1; Picea glauca clone GQ02801_A19 mRNA sequence}	{PF01055:Glycosyl hydrolases family 31 }
transcript_HQ_AA_transcript10338/f4p0/3318	{XP_006838997.2; PREDICTED: methylcrotonoyl-CoA carboxylase subunit alpha, mitochondrial [Amborella trichopoda]}	{sp|Q42523|MCCA_ARATH; Methylcrotonoyl-CoA carboxylase subunit alpha, mitochondrial OS=Arabidopsis thaliana GN=MCCA PE=1 SV=2}	{egu:105057347; K01968 E6.4.1.4A 3-methylcrotonyl-CoA carboxylase alpha subunit 6.4.1.4 ko00280; Metabolism; Amino acid metabolism; Valine, leucine and isoleucine degradation}	{At1g03090; KOG0238 3-Methylcrotonyl-CoA carboxylase, biotin-containing subunit/Propionyl-CoA carboxylase, alpha chain/Acetyl-CoA carboxylase, biotin carboxylase subunit IE Lipid transport and metabolism ; Amino acid transport and metabolism ;}	{GO:0005524; ATP binding; molecular_function}	{BT104187.1; Picea glauca clone GQ02807_F10 mRNA sequence}	{PF02786:Carbamoyl-phosphate synthase L chain, ATP binding domain}
transcript_HQ_AA_transcript1034/f2p0/5667	{XP_011077556.1; PREDICTED: phosphoinositide phospholipase C 2-like [Sesamum indicum]}	{sp|O13433|PLC1_CANAX; 1-phosphatidylinositol 4,5-bisphosphate phosphodiesterase 1 OS=Candida albicans GN=PLC1 PE=4 SV=1}	{sind:105161539; K05857 PLCD phosphatidylinositol phospholipase C, delta 3.1.4.11 ko00562; Metabolism; Carbohydrate metabolism; Inositol phosphate metabolism | ko04020; Environmental Information Processing; Signal transduction; Calcium signaling pathway | ko04070; Environmental Information Processing; Signal transduction; Phosphatidylinositol signaling system | ko04919; Organismal Systems; Endocr…	{SPAC22F8.11; KOG0169 Phosphoinositide-specific phospholipase C T Signal transduction mechanisms ;}	{GO:0035556; intracellular signal transduction; biological_process GO:0007165; signal transduction; biological_process GO:0008081; phosphoric diester hydrolase activity; molecular_function GO:0006629; lipid metabolic process; biological_process GO:0005509; calcium ion binding; molecular_function GO:0004435; phosphatidylinositol phospholipase C activity; molecular_function}	{NA}	{PF03009:Glycerophosphoryl diester phosphodiesterase family PF13833:EF-hand domain pair PF00036:EF hand PF00387:Phosphatidylinositol-specific phospholipase C, Y domain PF13499:EF-hand domain pair}
transcript_HQ_AA_transcript10344/f4p0/3353	{BAJ99339.1; predicted protein [Hordeum vulgare subsp. vulgare]}	{sp|P05030|PMA1_YEAST; Plasma membrane ATPase 1 OS=Saccharomyces cerevisiae (strain ATCC 204508 / S288c) GN=PMA1 PE=1 SV=2}	{pda:103707081; K01535 PMA1, PMA2 H+-transporting ATPase 3.6.3.6 ko00190; Metabolism; Energy metabolism; Oxidative phosphorylation}	{YGL008c; KOG0205 Plasma membrane H+-transporting ATPase P Inorganic ion transport and metabolism ;}	{GO:0046872; metal ion binding; molecular_function GO:0000166; nucleotide binding; molecular_function}	{AK110177.1; Oryza sativa Japonica Group cDNA clone:002-161-G12, full insert sequence}	{PF00122:E1-E2 ATPase}
transcript_HQ_AA_transcript10345/f2p0/3387	{OAE24500.1; hypothetical protein AXG93_1615s1540 [Marchantia polymorpha subsp. polymorpha]}	{sp|Q8GZ38|UNE10_ARATH; Transcription factor UNE10 OS=Arabidopsis thaliana GN=UNE10 PE=2 SV=1}	{vvi:100262490; K16189 PIF4 phytochrome-interacting factor 4 - ko04075; Environmental Information Processing; Signal transduction; Plant hormone signal transduction}	{NA}	{GO:0046983; protein dimerization activity; molecular_function}	{XM_019332945.1; PREDICTED: Ipomoea nil transcription factor PIF1-like (LOC109182760), mRNA}	{PF00010:Helix-loop-helix DNA-binding domain}
transcript_HQ_AA_transcript10352/f2p0/3348	{XP_011627852.1; PREDICTED: probable E3 ubiquitin-protein ligase HIP1 isoform X2 [Amborella trichopoda]}	{sp|O49500|MBR2_ARATH; E3 ubiquitin-protein ligase MBR2 OS=Arabidopsis thaliana GN=MBR2 PE=1 SV=1}	{atr:18446288; K10635 RNF111 E3 ubiquitin-protein ligase Arkadia 2.3.2.27 -}	{At4g34040; KOG0800 FOG: Predicted E3 ubiquitin ligase O Posttranslational modification, protein turnover, chaperones ;}	{GO:0004842; ubiquitin-protein ligase activity; molecular_function GO:0005515; protein binding; molecular_function GO:0046872; metal ion binding; molecular_function GO:0008270; zinc ion binding; molecular_function GO:0005680; anaphase-promoting complex; cellular_component}	{BT115321.1; Picea glauca clone GQ03614_D03 mRNA sequence}	{PF00097:Zinc finger, C3HC4 type (RING finger) PF12861:Anaphase-promoting complex subunit 11 RING-H2 finger PF17123:RING-like zinc finger PF13639:Ring finger domain PF12906:RING-variant domain PF12678:RING-H2 zinc finger domain PF14634:zinc-RING finger domain}
transcript_HQ_AA_transcript10353/f3p0/3333	{AAY78890.1; CC-NBS-LRR resistance-like protein [Pinus lambertiana]}	{sp|Q9SZA7|DRL29_ARATH; Probable disease resistance protein At4g33300 OS=Arabidopsis thaliana GN=At4g33300 PE=2 SV=3}	{ats:F775_07053; - - - - -}	{NA}	{GO:0005515; protein binding; molecular_function GO:0043531; ADP binding; molecular_function}	{FJ145387.2; Pinus taeda isolate 7470 anonymous locus CL71Contig1_04 genomic sequence}	{PF00560:Leucine Rich Repeat PF00931:NB-ARC domain PF13855:Leucine rich repeat}
transcript_HQ_AA_transcript10354/f3p0/3367	{BAK05473.1; predicted protein [Hordeum vulgare subsp. vulgare]}	{sp|Q4WPF5|SEBA_ASPFU; C2H2 finger domain transcription factor sebA OS=Neosartorya fumigata (strain ATCC MYA-4609 / Af293 / CBS 101355 / FGSC A1100) GN=sebA PE=4 SV=1}	{bpg:Bathy04g02810; - - - - -; bpg:Bathy04g02810; - - - - -}	{YER130c; KOG1721 FOG: Zn-finger R General function prediction only ;}	{GO:0003677; DNA binding; molecular_function GO:0046872; metal ion binding; molecular_function}	{NA}	{PF16622:zinc-finger C2H2-type PF13465:Zinc-finger double domain PF00096:Zinc finger, C2H2 type PF13912:C2H2-type zinc finger PF02892:BED zinc finger}
transcript_HQ_AA_transcript10356/f3p0/3333	{JAT52384.1; Cell pattern formation-associated protein stuA, partial [Anthurium amnicola]}	{sp|B8NBX4|STUA_ASPFN; Cell pattern formation-associated protein stuA OS=Aspergillus flavus (strain ATCC 200026 / FGSC A1120 / NRRL 3357 / JCM 12722 / SRRC 167) GN=stuA PE=2 SV=1}	{NA}	{NA}	{GO:0015689; molybdate ion transport; biological_process GO:0015098; molybdate ion transmembrane transporter activity; molecular_function}	{NA}	{PF16983:Molybdate transporter of MFS superfamily}
transcript_HQ_AA_transcript10358/f3p0/3354	{OAE31968.1; hypothetical protein AXG93_4421s1190 [Marchantia polymorpha subsp. polymorpha]}	{sp|Q9LTT8|VCS_ARATH; Enhancer of mRNA-decapping protein 4 OS=Arabidopsis thaliana GN=VCS PE=1 SV=1}	{nnu:104594385; K12616 EDC4 enhancer of mRNA-decapping protein 4 - ko03018; Genetic Information Processing; Folding, sorting and degradation; RNA degradation}	{At3g13300; KOG1916 Nuclear protein, contains WD40 repeats R General function prediction only ;}	{GO:0005515; protein binding; molecular_function}	{BT107904.1; Picea glauca clone GQ03114_D11 mRNA sequence}	{PF00400:WD domain, G-beta repeat}
transcript_HQ_AA_transcript10359/f2p0/3346	{XP_018674675.1; PREDICTED: LOW QUALITY PROTEIN: uncharacterized protein LOC108951439 [Musa acuminata subsp. malaccensis]}	{sp|P10978|POLX_TOBAC; Retrovirus-related Pol polyprotein from transposon TNT 1-94 OS=Nicotiana tabacum PE=2 SV=1}	{mus:108951439; - - - - -; mus:108951439; - - - - -}	{At1g58140; KOG0017 FOG: Transposon-encoded proteins with TYA, reverse transcriptase, integrase domains in various combinations R General function prediction only ;}	{NA}	{LN713264.1; Cucumis melo genomic chromosome, chr_10}	{NA}
transcript_HQ_AA_transcript1036/f3p0/5597	{OAE24733.1; hypothetical protein AXG93_2016s1380 [Marchantia polymorpha subsp. polymorpha]}	{sp|Q9CAF4|NUP1_ARATH; Nuclear pore complex protein NUP1 OS=Arabidopsis thaliana GN=NUP1 PE=1 SV=1}	{egu:105042431; - - - - -}	{At3g10650; KOG0845 Nuclear pore complex, Nup98 component (sc Nup145/Nup100/Nup116) YU Nuclear structure ; Intracellular trafficking, secretion, and vesicular transport ;}	{NA}	{NA}	{NA}
transcript_HQ_AA_transcript10360/f2p0/3361	{XP_001776975.1; predicted protein [Physcomitrella patens]}	{sp|Q75JF3|CLCC_DICDI; Chloride channel protein C OS=Dictyostelium discoideum GN=clcC PE=3 SV=1}	{smo:SELMODRAFT_449287; - - - - -}	{At5g26240; KOG0474 Cl- channel CLC-7 and related proteins (CLC superfamily) P Inorganic ion transport and metabolism ;}	{GO:0055085; transmembrane transport; biological_process GO:0016020; membrane; cellular_component GO:0006821; chloride transport; biological_process GO:0005247; voltage-gated chloride channel activity; molecular_function}	{NA}	{PF00654:Voltage gated chloride channel}
transcript_HQ_AA_transcript10363/f3p0/3338	{OAE22503.1; hypothetical protein AXG93_4697s1400 [Marchantia polymorpha subsp. polymorpha]}	{sp|Q07970|KN14C_ARATH; Kinesin-like protein KIN-14C OS=Arabidopsis thaliana GN=KIN14C PE=2 SV=1}	{ppp:PHYPADRAFT_130120; K10405 KIFC1 kinesin family member C1 - -}	{At4g21270; KOG0239 Kinesin (KAR3 subfamily) Z Cytoskeleton ;}	{GO:0006606; protein import into nucleus; biological_process GO:0005524; ATP binding; molecular_function GO:0072686; mitotic spindle; cellular_component GO:0003777; microtubule motor activity; molecular_function GO:0008017; microtubule binding; molecular_function GO:0008608; attachment of spindle microtubules to kinetochore; biological_process GO:0007018; microtubule-based movement; biological_pr…	{BT107797.1; Picea glauca clone GQ03112_N12 mRNA sequence}	{PF07926:TPR/MLP1/MLP2-like protein PF16796:Microtubule binding PF08653:DASH complex subunit Dam1 PF00225:Kinesin motor domain PF04111:Autophagy protein Apg6}
transcript_HQ_AA_transcript10365/f3p0/3347	{XP_010247870.1; PREDICTED: cullin-4-like isoform X1 [Nelumbo nucifera]}	{sp|Q8LGH4|CUL4_ARATH; Cullin-4 OS=Arabidopsis thaliana GN=CUL4 PE=1 SV=1}	{jcu:105633998; K10609 CUL4 cullin 4 - ko04120; Genetic Information Processing; Folding, sorting and degradation; Ubiquitin mediated proteolysis | ko03420; Genetic Information Processing; Replication and repair; Nucleotide excision repair}	{At5g46210; KOG2167 Cullins D Cell cycle control, cell division, chromosome partitioning ;}	{GO:0031625; ubiquitin protein ligase binding; molecular_function GO:0006511; ubiquitin-dependent protein catabolic process; biological_process}	{BT115942.1; Picea glauca clone GQ03709_C15 mRNA sequence}	{PF00888:Cullin family}
transcript_HQ_AA_transcript10367/f3p0/3343	{ACN39902.1; unknown [Picea sitchensis]}	{sp|Q9FPR3|EDR1_ARATH; Serine/threonine-protein kinase EDR1 OS=Arabidopsis thaliana GN=EDR1 PE=1 SV=1}	{cic:CICLE_v10004362mg; - - - - -}	{At5g49470; KOG0192 Tyrosine kinase specific for activated (GTP-bound) p21cdc42Hs T Signal transduction mechanisms ;}	{GO:0005524; ATP binding; molecular_function GO:0006355; regulation of transcription, DNA-dependent; biological_process GO:0004672; protein kinase activity; molecular_function GO:0006468; protein phosphorylation; biological_process GO:0005515; protein binding; molecular_function}	{BT070386.1; Picea sitchensis clone WS02726_F21 unknown mRNA}	{PF00069:Protein kinase domain PF08447:PAS fold PF07714:Protein tyrosine kinase PF00989:PAS fold}
transcript_HQ_AA_transcript10374/f2p0/3338	{XP_009392484.1; PREDICTED: protein transport protein Sec24-like At4g32640 [Musa acuminata subsp. malaccensis]}	{sp|Q9USS7|YNB3_SCHPO; Uncharacterized protein C4.03c OS=Schizosaccharomyces pombe (strain 972 / ATCC 24843) GN=SPBC4.03c PE=2 SV=1}	{atr:18447425; K14007 SEC24 protein transport protein SEC24 - ko04141; Genetic Information Processing; Folding, sorting and degradation; Protein processing in endoplasmic reticulum}	{SPBC4.03c; KOG1984 Vesicle coat complex COPII, subunit SFB3 U Intracellular trafficking, secretion, and vesicular transport ;}	{GO:0006888; ER to Golgi vesicle-mediated transport; biological_process GO:0005743; mitochondrial inner membrane; cellular_component GO:0008270; zinc ion binding; molecular_function GO:0006886; intracellular protein transport; biological_process GO:0030127; COPII vesicle coat; cellular_component}	{NA}	{PF04811:Sec23/Sec24 trunk domain PF04815:Sec23/Sec24 helical domain PF14611:Mitochondrial inner-membrane-bound regulator PF04810:Sec23/Sec24 zinc finger}
transcript_HQ_AA_transcript10376/f3p0/3363	{XP_009350208.1; PREDICTED: flavin carrier protein 1-like [Pyrus x bretschneideri]}	{sp|P39719|FLC2_YEAST; Flavin carrier protein 2 OS=Saccharomyces cerevisiae (strain ATCC 204508 / S288c) GN=FLC2 PE=1 SV=2}	{NA}	{NA}	{NA}	{NA}	{NA}
transcript_HQ_AA_transcript10378/f2p0/3342	{GAQ78361.1; Catalase [Klebsormidium flaccidum]}	{sp|Q9HDZ2|CWH43_SCHPO; Protein cwh43 OS=Schizosaccharomyces pombe (strain 972 / ATCC 24843) GN=cwh43 PE=2 SV=2}	{NA}	{SPAC589.12; KOG3979 FGF receptor activating protein 1 T Signal transduction mechanisms ;}	{NA}	{NA}	{NA}
transcript_HQ_AA_transcript10379/f2p0/3437	{XP_019193131.1; PREDICTED: uncharacterized protein LOC109187401 [Ipomoea nil]}	{NA}	{cit:102616640; - - - - -}	{NA}	{NA}	{NA}	{NA}
transcript_HQ_AA_transcript10381/f2p0/3358	{XP_008806334.1; PREDICTED: methyl-CpG-binding domain-containing protein 9-like [Phoenix dactylifera]}	{sp|Q9SGH2|MBD9_ARATH; Methyl-CpG-binding domain-containing protein 9 OS=Arabidopsis thaliana GN=MBD9 PE=2 SV=1}	{pda:103699157; - - - - -}	{NA}	{GO:0005515; protein binding; molecular_function GO:0005634; nucleus; cellular_component GO:0003677; DNA binding; molecular_function GO:0035556; intracellular signal transduction; biological_process}	{NA}	{PF05964:F/Y-rich N-terminus PF00628:PHD-finger PF00130:Phorbol esters/diacylglycerol binding domain (C1 domain) PF01429:Methyl-CpG binding domain PF05965:F/Y rich C-terminus}
transcript_HQ_AA_transcript10382/f2p0/3358	{XP_001777642.1; predicted protein [Physcomitrella patens]}	{sp|Q8WZJ7|C1TC_SCHPO; C-1-tetrahydrofolate synthase, cytoplasmic OS=Schizosaccharomyces pombe (strain 972 / ATCC 24843) GN=SPBC839.16 PE=3 SV=1}	{sita:101775060; K01938 fhs formate--tetrahydrofolate ligase 6.3.4.3 ko01200; Metabolism; Global and overview maps; Carbon metabolism | ko00720; Metabolism; Energy metabolism; Carbon fixation pathways in prokaryotes | ko00670; Metabolism; Metabolism of cofactors and vitamins; One carbon pool by folate}	{SPBC839.16; KOG4230 C1-tetrahydrofolate synthase H Coenzyme transport and metabolism ;}	{GO:0004488; methylenetetrahydrofolate dehydrogenase (NADP+) activity; molecular_function GO:0004329; formate-tetrahydrofolate ligase activity; molecular_function GO:0055114; oxidation-reduction process; biological_process GO:0005524; ATP binding; molecular_function GO:0003824; NA GO:0009396; folic acid-containing compound biosynthetic process; biological_process}	{XM_010502313.2; PREDICTED: Camelina sativa formate--tetrahydrofolate ligase (LOC104777977), mRNA}	{PF00763:Tetrahydrofolate dehydrogenase/cyclohydrolase, catalytic domain PF01268:Formate--tetrahydrofolate ligase PF02882:Tetrahydrofolate dehydrogenase/cyclohydrolase, NAD(P)-binding domain}
transcript_HQ_AA_transcript10383/f3p0/3370	{XP_002501695.1; predicted protein [Micromonas commoda]}	{sp|P28350|SYV_NEUCR; Valine--tRNA ligase, mitochondrial OS=Neurospora crassa (strain ATCC 24698 / 74-OR23-1A / CBS 708.71 / DSM 1257 / FGSC 987) GN=cyt-20 PE=1 SV=1}	{mis:MICPUN_96323; K01873 VARS, valS valyl-tRNA synthetase 6.1.1.9 ko00970; Genetic Information Processing; Translation; Aminoacyl-tRNA biosynthesis}	{YGR094w; KOG0432 Valyl-tRNA synthetase J Translation, ribosomal structure and biogenesis ;}	{GO:0006418; tRNA aminoacylation for protein translation; biological_process GO:0002161; aminoacyl-tRNA editing activity; molecular_function GO:0005524; ATP binding; molecular_function GO:0000166; nucleotide binding; molecular_function GO:0004812; aminoacyl-tRNA ligase activity; molecular_function}	{NA}	{PF00133:tRNA synthetases class I (I, L, M and V) PF13603:Leucyl-tRNA synthetase, Domain 2 PF09334:tRNA synthetases class I (M) PF08264:Anticodon-binding domain of tRNA}
transcript_HQ_AA_transcript10390/f2p0/3331	{XP_010268877.1; PREDICTED: uncharacterized protein LOC104605707 [Nelumbo nucifera]}	{NA}	{nnu:104605707; - - - - -}	{NA}	{NA}	{XM_017367088.1; PREDICTED: Daucus carota subsp. sativus uncharacterized LOC108199319 (LOC108199319), mRNA}	{NA}
transcript_HQ_AA_transcript10392/f2p0/3415	{BAK00435.1; predicted protein [Hordeum vulgare subsp. vulgare]}	{sp|Q5AHG6|SCH9_CANAL; Serine/threonine-protein kinase SCH9 OS=Candida albicans (strain SC5314 / ATCC MYA-2876) GN=SCH9 PE=3 SV=1}	{vcn:VOLCADRAFT_58602; K04688 RPS6KB ribosomal protein S6 kinase beta 2.7.11.1 ko04012; Environmental Information Processing; Signal transduction; ErbB signaling pathway | ko04350; Environmental Information Processing; Signal transduction; TGF-beta signaling pathway | ko04371; Environmental Information Processing; Signal transduction; Apelin signaling pathway | ko04066; Environmental Information …	{YHR205w; KOG0598 Ribosomal protein S6 kinase and related proteins RT General function prediction only ; Signal transduction mechanisms ;}	{GO:0016773; phosphotransferase activity, alcohol group as acceptor; molecular_function GO:0004672; protein kinase activity; molecular_function GO:0006468; protein phosphorylation; biological_process GO:0005515; protein binding; molecular_function GO:0005524; ATP binding; molecular_function GO:0016020; membrane; cellular_component GO:0004674; protein serine/threonine kinase activity; molecular_fu…	{NA}	{PF00168:C2 domain PF00069:Protein kinase domain PF06293:Lipopolysaccharide kinase (Kdo/WaaP) family PF07714:Protein tyrosine kinase PF00433:Protein kinase C terminal domain}
transcript_HQ_AA_transcript10398/f2p0/3353	{XP_003634715.1; PREDICTED: 1,4-alpha-glucan-branching enzyme 3, chloroplastic/amyloplastic [Vitis vinifera]}	{sp|D2WL32|GLGB3_ARATH; 1,4-alpha-glucan-branching enzyme 3, chloroplastic/amyloplastic OS=Arabidopsis thaliana GN=SBE3 PE=1 SV=1}	{atr:18446746; K00700 GBE1, glgB 1,4-alpha-glucan branching enzyme 2.4.1.18 ko00500; Metabolism; Carbohydrate metabolism; Starch and sucrose metabolism}	{At3g20440; KOG0470 1,4-alpha-glucan branching enzyme/starch branching enzyme II G Carbohydrate transport and metabolism ;}	{GO:0004553; hydrolase activity, hydrolyzing O-glycosyl compounds; molecular_function GO:0043169; cation binding; molecular_function GO:0003824; NA GO:0005975; carbohydrate metabolic process; biological_process}	{XM_016043782.1; PREDICTED: Ziziphus jujuba 1,4-alpha-glucan-branching enzyme 3, chloroplastic/amyloplastic (LOC107432594), transcript variant X2, mRNA}	{PF02806:Alpha amylase, C-terminal all-beta domain PF02922:Carbohydrate-binding module 48 (Isoamylase N-terminal domain) PF00128:Alpha amylase, catalytic domain}
transcript_HQ_AA_transcript10407/f3p0/3336	{ERN11151.1; hypothetical protein AMTR_s00024p00184500 [Amborella trichopoda]}	{sp|Q96DM3|MIC1_HUMAN; Uncharacterized protein C18orf8 OS=Homo sapiens GN=C18orf8 PE=1 SV=2}	{atr:18439340; - - - - -}	{At3g12010; KOG2377 Uncharacterized conserved protein S Function unknown ;}	{NA}	{NA}	{NA}
transcript_HQ_AA_transcript10408/f3p0/3352	{XP_006481828.1; PREDICTED: 1,4-alpha-glucan-branching enzyme 2-2, chloroplastic/amyloplastic isoform X1 [Citrus sinensis]}	{sp|Q41058|GLGB1_PEA; 1,4-alpha-glucan-branching enzyme 1, chloroplastic/amyloplastic OS=Pisum sativum GN=SBEI PE=1 SV=1}	{nnu:104587877; K00700 GBE1, glgB 1,4-alpha-glucan branching enzyme 2.4.1.18 ko00500; Metabolism; Carbohydrate metabolism; Starch and sucrose metabolism}	{At5g03650; KOG0470 1,4-alpha-glucan branching enzyme/starch branching enzyme II G Carbohydrate transport and metabolism ;}	{GO:0004553; hydrolase activity, hydrolyzing O-glycosyl compounds; molecular_function GO:0043169; cation binding; molecular_function GO:0003824; NA GO:0005975; carbohydrate metabolic process; biological_process}	{XM_009367082.2; PREDICTED: Pyrus x bretschneideri 1,4-alpha-glucan-branching enzyme 2-2, chloroplastic/amyloplastic-like (LOC103955206), transcript variant X2, mRNA}	{PF02806:Alpha amylase, C-terminal all-beta domain PF02922:Carbohydrate-binding module 48 (Isoamylase N-terminal domain) PF00128:Alpha amylase, catalytic domain}
transcript_HQ_AA_transcript1041/f6p0/5654	{ABK26716.1; unknown [Picea sitchensis]}	{NA}	{cmo:103491044; - - - - -}	{NA}	{NA}	{NA}	{NA}
transcript_HQ_AA_transcript10411/f3p0/3334	{NA}	{sp|P01129|CDC10_SCHPO; Start control protein cdc10 OS=Schizosaccharomyces pombe (strain 972 / ATCC 24843) GN=cdc10 PE=1 SV=1}	{NA}	{NA}	{GO:0005515; protein binding; molecular_function}	{NA}	{PF13606:Ankyrin repeat}
transcript_HQ_AA_transcript10415/f2p0/3340	{ABR16250.1; unknown [Picea sitchensis]}	{sp|Q07121|AMO1_ARTS1; Primary amine oxidase OS=Arthrobacter sp. (strain P1) GN=maoI PE=1 SV=1}	{atr:18435143; K00276 AOC3, AOC2, tynA primary-amine oxidase 1.4.3.21 ko00260; Metabolism; Amino acid metabolism; Glycine, serine and threonine metabolism | ko00350; Metabolism; Amino acid metabolism; Tyrosine metabolism | ko00360; Metabolism; Amino acid metabolism; Phenylalanine metabolism | ko00410; Metabolism; Metabolism of other amino acids; beta-Alanine metabolism | ko00950; Metabolism; Bios…	{At2g42490; KOG1186 Copper amine oxidase Q Secondary metabolites biosynthesis, transport and catabolism ;}	{GO:0009308; amine metabolic process; biological_process GO:0055114; oxidation-reduction process; biological_process GO:0048038; quinone binding; molecular_function GO:0008131; primary amine oxidase activity; molecular_function GO:0005507; copper ion binding; molecular_function}	{EF676343.1; Picea sitchensis clone WS02732_E03 unknown mRNA}	{PF02728:Copper amine oxidase, N3 domain PF01179:Copper amine oxidase, enzyme domain PF02727:Copper amine oxidase, N2 domain}
transcript_HQ_AA_transcript10418/f2p0/3335	{XP_010254244.1; PREDICTED: transcriptional corepressor LEUNIG-like isoform X3 [Nelumbo nucifera]}	{sp|Q9FUY2|LEUNG_ARATH; Transcriptional corepressor LEUNIG OS=Arabidopsis thaliana GN=LUG PE=1 SV=2}	{nnu:104595274; - - - - -}	{At4g32551; KOG0266 WD40 repeat-containing protein R General function prediction only ;}	{GO:0005215; NA GO:0005219; ryanodine-sensitive calcium-release channel activity; molecular_function GO:0015991; ATP hydrolysis coupled proton transport; biological_process GO:0005856; cytoskeleton; cellular_component GO:0046658; anchored to plasma membrane; cellular_component GO:0009401; phosphoenolpyruvate-dependent sugar phosphotransferase system; biological_process GO:0006270; DNA-dependent D…	{BT113974.1; Picea glauca clone GQ03505_L12 mRNA sequence}	{PF08513:LisH PF15748:Centriole, cilia and spindle-associated PF05558:DREPP plasma membrane polypeptide PF02724:CDC45-like protein PF03612:Sorbitol phosphotransferase enzyme II N-terminus PF06459:Ryanodine Receptor TM 4-6 PF06682:SOCE-associated regulatory factor of calcium homoeostasis PF03522:Solute carrier family 12 PF01080:Presenilin PF01496:V-type ATPase 116kDa subunit family }
transcript_HQ_AA_transcript1042/f2p0/5670	{OMO82721.1; CLIP-associated protein [Corchorus capsularis]}	{sp|Q54S77|VPS15_DICDI; Probable serine/threonine-protein kinase vps15 OS=Dictyostelium discoideum GN=vps15 PE=3 SV=1}	{pxb:103946111; K08333 PIK3R4, VPS15 phosphoinositide-3-kinase, regulatory subunit 4 2.7.11.1 ko04371; Environmental Information Processing; Signal transduction; Apelin signaling pathway | ko04140; Cellular Processes; Transport and catabolism; Autophagy - animal | ko04138; Cellular Processes; Transport and catabolism; Autophagy - yeast}	{At4g29380; KOG1240 Protein kinase containing WD40 repeats T Signal transduction mechanisms ;}	{GO:0004672; protein kinase activity; molecular_function GO:0005515; protein binding; molecular_function GO:0006468; protein phosphorylation; biological_process GO:0005524; ATP binding; molecular_function}	{BT104424.1; Picea glauca clone GQ02810_D09 mRNA sequence}	{PF07714:Protein tyrosine kinase PF00400:WD domain, G-beta repeat PF02985:HEAT repeat PF00069:Protein kinase domain}
transcript_HQ_AA_transcript10424/f2p0/3336	{NA}	{NA}	{NA}	{NA}	{GO:0016021; integral to membrane; cellular_component}	{NA}	{PF05478:Prominin}
transcript_HQ_AA_transcript10430/f2p0/3340	{NA}	{NA}	{NA}	{NA}	{GO:0015991; ATP hydrolysis coupled proton transport; biological_process GO:0006355; regulation of transcription, DNA-dependent; biological_process GO:0043565; sequence-specific DNA binding; molecular_function GO:0005634; nucleus; cellular_component GO:0033179; proton-transporting V-type ATPase, V0 domain; cellular_component GO:0015078; hydrogen ion transmembrane transporter activity; molecular_f…	{NA}	{PF00170:bZIP transcription factor PF07716:Basic region leucine zipper PF01496:V-type ATPase 116kDa subunit family PF03131:bZIP Maf transcription factor}
transcript_HQ_AA_transcript10438/f4p0/3331	{ERN11151.1; hypothetical protein AMTR_s00024p00184500 [Amborella trichopoda]}	{sp|Q96DM3|MIC1_HUMAN; Uncharacterized protein C18orf8 OS=Homo sapiens GN=C18orf8 PE=1 SV=2}	{atr:18439340; - - - - -}	{At3g12010; KOG2377 Uncharacterized conserved protein S Function unknown ;}	{NA}	{NA}	{NA}
transcript_HQ_AA_transcript1044/f2p0/5684	{XP_009350876.1; PREDICTED: transcriptional regulatory protein SIN3-like [Pyrus x bretschneideri]}	{sp|Q09750|PST1_SCHPO; Paired amphipathic helix protein pst1 OS=Schizosaccharomyces pombe (strain 972 / ATCC 24843) GN=pst1 PE=1 SV=1}	{olu:OSTLU_239; K11644 SIN3A paired amphipathic helix protein Sin3a - ko04139; Cellular Processes; Transport and catabolism; Mitophagy - yeast | ko04919; Organismal Systems; Endocrine system; Thyroid hormone signaling pathway | ko05202; Human Diseases; Cancers: Overview; Transcriptional misregulation in cancer | ko05016; Human Diseases; Neurodegenerative diseases; Huntington's disease}	{YOL004w; KOG4204 Histone deacetylase complex, SIN3 component B Chromatin structure and dynamics ;}	{GO:0006355; regulation of transcription, DNA-dependent; biological_process}	{NA}	{PF02671:Paired amphipathic helix repeat}
transcript_HQ_AA_transcript10440/f2p0/3370	{XP_002305449.1; beta-galactosidase family protein [Populus trichocarpa]}	{sp|Q2UCU3|BGALA_ASPOR; Probable beta-galactosidase A OS=Aspergillus oryzae (strain ATCC 42149 / RIB 40) GN=lacA PE=1 SV=1}	{gsl:Gasu_09330; - - - - -}	{At4g36360; KOG0496 Beta-galactosidase G Carbohydrate transport and metabolism ;}	{NA}	{NA}	{NA}
transcript_HQ_AA_transcript10444/f3p0/3330	{ERN15547.1; hypothetical protein AMTR_s00048p00122750 [Amborella trichopoda]}	{sp|Q8RY59|RCD1_ARATH; Inactive poly [ADP-ribose] polymerase RCD1 OS=Arabidopsis thaliana GN=RCD1 PE=1 SV=1}	{atr:18443837; - - - - -}	{NA}	{GO:0003950; NAD+ ADP-ribosyltransferase activity; molecular_function}	{NA}	{PF00644:Poly(ADP-ribose) polymerase catalytic domain}
transcript_HQ_AA_transcript10445/f4p0/3321	{XP_008800196.1; PREDICTED: flowering time control protein FY [Phoenix dactylifera]}	{sp|Q6NLV4|FY_ARATH; Flowering time control protein FY OS=Arabidopsis thaliana GN=FY PE=1 SV=1}	{vvi:100263567; K15542 PFS2 polyadenylation factor subunit 2 - ko03015; Genetic Information Processing; Translation; mRNA surveillance pathway}	{At5g13480; KOG0284 Polyadenylation factor I complex, subunit PFS2 A RNA processing and modification ;}	{GO:0005198; NA GO:0030117; membrane coat; cellular_component GO:0006886; intracellular protein transport; biological_process GO:0005515; protein binding; molecular_function GO:0016192; vesicle-mediated transport; biological_process}	{XM_009399339.2; PREDICTED: Musa acuminata subsp. malaccensis flowering time control protein FY (LOC103982418), transcript variant X3, mRNA}	{PF04053:Coatomer WD associated region PF00400:WD domain, G-beta repeat}
transcript_HQ_AA_transcript1045/f3p0/5684	{XP_007024715.2; PREDICTED: uncharacterized protein LOC18596277 isoform X1 [Theobroma cacao]}	{NA}	{jcu:105631354; - - - - -}	{NA}	{NA}	{BT108755.1; Picea glauca clone GQ03126_K07 mRNA sequence}	{NA}
transcript_HQ_AA_transcript10452/f2p0/3091	{XP_006855017.1; PREDICTED: F-box/LRR-repeat protein At1g67190 [Amborella trichopoda]}	{sp|Q9ZW88|FBL34_ARATH; F-box/LRR-repeat protein At1g67190 OS=Arabidopsis thaliana GN=At1g67190 PE=2 SV=1}	{atr:18444846; - - - - -}	{NA}	{GO:0005515; protein binding; molecular_function}	{BT104775.1; Picea glauca clone GQ02814_N02 mRNA sequence}	{PF00646:F-box domain PF12937:F-box-like}
transcript_HQ_AA_transcript10455/f2p0/3341	{XP_002993367.1; hypothetical protein SELMODRAFT_137012 [Selaginella moellendorffii]}	{sp|P25038|IF2M_YEAST; Translation initiation factor IF-2, mitochondrial OS=Saccharomyces cerevisiae (strain ATCC 204508 / S288c) GN=IFM1 PE=1 SV=2}	{smo:SELMODRAFT_98506; K02519 infB, MTIF2 translation initiation factor IF-2 - -}	{YOL023w; KOG1145 Mitochondrial translation initiation factor 2 (IF-2; GTPase) J Translation, ribosomal structure and biogenesis ;}	{GO:0008270; zinc ion binding; molecular_function GO:0005524; ATP binding; molecular_function GO:0005525; GTP binding; molecular_function GO:0006576; cellular biogenic amine metabolic process; biological_process}	{NA}	{PF00641:Zn-finger in Ran binding protein and others PF01926:50S ribosome-binding GTPase PF00025:ADP-ribosylation factor family PF02421:Ferrous iron transport protein B PF03144:Elongation factor Tu domain 2 PF10662:Ethanolamine utilisation - propanediol utilisation}
transcript_HQ_AA_transcript1046/f2p0/5693	{XP_002504558.1; JmjN/JmjC protein [Micromonas commoda]}	{sp|P39956|RPH1_YEAST; DNA damage-responsive transcriptional repressor RPH1 OS=Saccharomyces cerevisiae (strain ATCC 204508 / S288c) GN=RPH1 PE=1 SV=1}	{mis:MICPUN_61256; K06709 KDM4, JMJD2, JHDM3 jumonji domain-containing protein 2 1.14.11.- -}	{YER169w_1; KOG0958 DNA damage-responsive repressor GIS1/RPH1, jumonji superfamily L Replication, recombination and repair ;}	{NA}	{NA}	{NA}
transcript_HQ_AA_transcript10462/f2p0/3370	{XP_009382323.1; PREDICTED: trihelix transcription factor GTL1-like isoform X1 [Musa acuminata subsp. malaccensis]}	{sp|Q39117|TGT2_ARATH; Trihelix transcription factor GT-2 OS=Arabidopsis thaliana GN=GT-2 PE=2 SV=1}	{mus:103970317; - - - - -}	{At1g76890; KOG4282 Transcription factor GT-2 and related proteins, contains trihelix DNA-binding/SANT domain K Transcription ;}	{NA}	{BT115515.1; Picea glauca clone GQ03619_G22 mRNA sequence}	{NA}
transcript_HQ_AA_transcript10464/f3p0/3353	{XP_010908788.1; PREDICTED: NAC domain-containing protein 86-like isoform X2 [Elaeis guineensis]}	{sp|Q9FFI5|NAC86_ARATH; NAC domain-containing protein 86 OS=Arabidopsis thaliana GN=NAC086 PE=2 SV=1}	{thj:104805658; - - - - -}	{NA}	{GO:0006355; regulation of transcription, DNA-dependent; biological_process GO:0003677; DNA binding; molecular_function}	{XM_018961035.1; PREDICTED: Juglans regia NAC domain-containing protein 86-like (LOC108987952), transcript variant X2, mRNA}	{PF02365:No apical meristem (NAM) protein}
transcript_HQ_AA_transcript10465/f2p0/3366	{ABR17974.1; unknown [Picea sitchensis]}	{sp|Q8CFK2|TF3B_MOUSE; Transcription factor IIIB 90 kDa subunit OS=Mus musculus GN=Brf1 PE=1 SV=1}	{nta:107770534; - - - - -}	{At3g09360; KOG1598 Transcription initiation factor TFIIIB, Brf1 subunit K Transcription ;}	{GO:0017025; TBP-class protein binding; molecular_function GO:0016020; membrane; cellular_component GO:0009306; protein secretion; biological_process}	{EF678200.1; Picea sitchensis clone WS0283_H22 unknown mRNA}	{PF00382:Transcription factor TFIIB repeat PF00771:FHIPEP family}
transcript_HQ_AA_transcript10468/f2p0/3338	{XP_006842302.1; PREDICTED: extended synaptotagmin-1 isoform X1 [Amborella trichopoda]}	{sp|K8FE10|SYT2_CAEEL; Synaptotagmin 2 OS=Caenorhabditis elegans GN=snt-2 PE=1 SV=1}	{egu:105041217; - - - - -}	{At3g18370; KOG1012 Ca2+-dependent lipid-binding protein CLB1/vesicle protein vp115/Granuphilin A, contains C2 domain R General function prediction only ;}	{GO:0055114; oxidation-reduction process; biological_process GO:0005515; protein binding; molecular_function GO:0016491; oxidoreductase activity; molecular_function}	{BT117478.1; Picea glauca clone GQ03901_E21 mRNA sequence}	{PF02738:Molybdopterin-binding domain of aldehyde dehydrogenase PF00168:C2 domain}
transcript_HQ_AA_transcript10471/f2p0/3329	{ADE76203.1; unknown [Picea sitchensis]}	{sp|Q570C0|TIR1_ARATH; Protein TRANSPORT INHIBITOR RESPONSE 1 OS=Arabidopsis thaliana GN=TIR1 PE=1 SV=2}	{rcu:8275363; K14485 TIR1 transport inhibitor response 1 - ko04075; Environmental Information Processing; Signal transduction; Plant hormone signal transduction}	{At3g62980; KOG1947 Leucine rich repeat proteins, some proteins contain F-box R General function prediction only ;}	{GO:0005515; protein binding; molecular_function GO:0005515; protein binding; molecular_function}	{BT122854.1; Picea sitchensis clone WS0462_C23 unknown mRNA}	{PF13516:Leucine Rich repeat PF13516:Leucine Rich repeat PF00646:F-box domain PF13855:Leucine rich repeat PF12937:F-box-like}
transcript_HQ_AA_transcript10479/f3p0/3340	{XP_006857187.1; PREDICTED: probable glucan 1,3-alpha-glucosidase [Amborella trichopoda]}	{sp|Q9FN05|PSL5_ARATH; Probable glucan 1,3-alpha-glucosidase OS=Arabidopsis thaliana GN=PSL5 PE=1 SV=1}	{atr:18447023; K05546 GANAB alpha 1,3-glucosidase 3.2.1.84 ko00510; Metabolism; Glycan biosynthesis and metabolism; N-Glycan biosynthesis | ko04141; Genetic Information Processing; Folding, sorting and degradation; Protein processing in endoplasmic reticulum}	{At5g63840; KOG1066 Glucosidase II catalytic (alpha) subunit and related enzymes, glycosyl hydrolase family 31 GMO Carbohydrate transport and metabolism ; Cell wall/membrane/envelope biogenesis ; Posttranslational modification, protein turnover, chaperones ;}	{GO:0005975; carbohydrate metabolic process; biological_process GO:0004553; hydrolase activity, hydrolyzing O-glycosyl compounds; molecular_function}	{BT103712.1; Picea glauca clone GQ02801_A19 mRNA sequence}	{PF01055:Glycosyl hydrolases family 31 }
transcript_HQ_AA_transcript10481/f2p0/3324	{XP_009394394.1; PREDICTED: protein DETOXIFICATION 42 isoform X2 [Musa acuminata subsp. malaccensis]}	{sp|Q9SYD6|DTX42_ARATH; Protein DETOXIFICATION 42 OS=Arabidopsis thaliana GN=DTX42 PE=2 SV=2}	{nnu:104597423; - - - - -}	{At1g51340; KOG1347 Uncharacterized membrane protein, predicted efflux pump R General function prediction only ;}	{GO:0015238; drug transmembrane transporter activity; molecular_function GO:0006855; drug transmembrane transport; biological_process GO:0015297; antiporter activity; molecular_function GO:0016020; membrane; cellular_component GO:0055085; transmembrane transport; biological_process}	{BT111242.1; Picea glauca clone GQ03234_L12 mRNA sequence}	{PF01554:MatE}
transcript_HQ_AA_transcript10486/f2p0/3318	{XP_019461602.1; PREDICTED: protein CHROMATIN REMODELING 19 [Lupinus angustifolius]}	{sp|Q9ZUL5|CHR19_ARATH; Protein CHROMATIN REMODELING 19 OS=Arabidopsis thaliana GN=ETL1 PE=1 SV=1}	{lang:109360873; K14439 SMARCAD1 SWI/SNF-related matrix-associated actin-dependent regulator of chromatin subfamily A containing DEAD/H box 1 3.6.4.12 ko04550; Cellular Processes; Cellular community - eukaryotes; Signaling pathways regulating pluripotency of stem cells; lang:109360873; - - - - -}	{At2g02090; KOG0389 SNF2 family DNA-dependent ATPase B Chromatin structure and dynamics ;}	{GO:0003677; DNA binding; molecular_function GO:0003676; nucleic acid binding; molecular_function GO:0005524; ATP binding; molecular_function GO:0016787; hydrolase activity; molecular_function}	{BT105250.1; Picea glauca clone GQ02820_C17 mRNA sequence}	{PF04851:Type III restriction enzyme, res subunit PF00176:SNF2 family N-terminal domain PF00270:DEAD/DEAH box helicase}
transcript_HQ_AA_transcript10488/f4p0/3326	{ADE75755.1; unknown [Picea sitchensis]}	{sp|P59326|YTHD1_MOUSE; YTH domain-containing family protein 1 OS=Mus musculus GN=Ythdf1 PE=1 SV=1}	{atr:18448943; K20102 YTHDF YTH domain-containing family protein - -}	{At1g79270; KOG1901 Uncharacterized high-glucose-regulated protein R General function prediction only ;}	{GO:0003723; RNA binding; molecular_function}	{XM_015832597.1; PREDICTED: Oryza brachyantha uncharacterized LOC102707720 (LOC102707720), transcript variant X2, mRNA}	{PF04146:YT521-B-like domain}
transcript_HQ_AA_transcript1049/f2p0/5661	{ACN40327.1; unknown [Picea sitchensis]}	{sp|Q54QV3|YAKA_DICDI; Probable serine/threonine-protein kinase yakA OS=Dictyostelium discoideum GN=yakA PE=1 SV=1}	{jcu:105632499; K18670 YAK1 dual specificity protein kinase YAK1 2.7.12.1 -}	{At5g35980; KOG0667 Dual-specificity tyrosine-phosphorylation regulated kinase R General function prediction only ;}	{GO:0004672; protein kinase activity; molecular_function GO:0006468; protein phosphorylation; biological_process GO:0016773; phosphotransferase activity, alcohol group as acceptor; molecular_function GO:0016020; membrane; cellular_component GO:0005524; ATP binding; molecular_function}	{BT070830.1; Picea sitchensis clone WS02752_N17 unknown mRNA}	{PF06293:Lipopolysaccharide kinase (Kdo/WaaP) family PF00069:Protein kinase domain PF07714:Protein tyrosine kinase}
transcript_HQ_AA_transcript10490/f2p0/3345	{XP_010273908.1; PREDICTED: phosphoinositide phosphatase SAC3-like isoform X2 [Nelumbo nucifera]}	{sp|Q94A27|SAC2_ARATH; Phosphoinositide phosphatase SAC2 OS=Arabidopsis thaliana GN=SAC2 PE=2 SV=1}	{mus:103968501; - - - - -}	{At3g43220; KOG1888 Putative phosphoinositide phosphatase I Lipid transport and metabolism ;}	{NA}	{XM_011623036.1; PREDICTED: Amborella trichopoda phosphoinositide phosphatase SAC2 (LOC18428728), transcript variant X2, mRNA}	{NA}
transcript_HQ_AA_transcript10495/f2p0/3331	{OMO58062.1; Arf GTPase activating protein [Corchorus olitorius]}	{sp|Q8RXE7|AGD14_ARATH; Probable ADP-ribosylation factor GTPase-activating protein AGD14 OS=Arabidopsis thaliana GN=AGD14 PE=1 SV=2}	{nnu:104595241; - - - - -}	{At1g08680; KOG0702 Predicted GTPase-activating protein T Signal transduction mechanisms ;}	{GO:0005096; GTPase activator activity; molecular_function GO:0008270; zinc ion binding; molecular_function GO:0005622; intracellular; cellular_component}	{XM_010658050.2; PREDICTED: Vitis vinifera probable ADP-ribosylation factor GTPase-activating protein AGD14 (LOC100249171), transcript variant X2, mRNA}	{PF00643:B-box zinc finger PF01412:Putative GTPase activating protein for Arf}
transcript_HQ_AA_transcript10497/f4p0/3322	{XP_010265699.1; PREDICTED: uncharacterized protein LOC104603377 [Nelumbo nucifera]}	{sp|A7SBN6|ZGPAT_NEMVE; Zinc finger CCCH-type with G patch domain-containing protein OS=Nematostella vectensis GN=v1g244155 PE=3 SV=1}	{cit:102618992; K17569 GPATCH2 G patch domain-containing protein 2 - -}	{At3g09850; KOG2184 Tuftelin-interacting protein TIP39, contains G-patch domain A RNA processing and modification ;}	{GO:0003676; nucleic acid binding; molecular_function}	{NA}	{PF01585:G-patch domain PF01424:R3H domain}
transcript_HQ_AA_transcript105/f2p0/7590	{NA}	{NA}	{NA}	{NA}	{NA}	{NA}	{NA}
transcript_HQ_AA_transcript1050/f2p0/5692	{ACN39991.1; unknown [Picea sitchensis]}	{sp|P42824|DNJH2_ALLPO; DnaJ protein homolog 2 OS=Allium porrum GN=LDJ2 PE=2 SV=1}	{ppp:PHYPADRAFT_176453; K09503 DNAJA2 DnaJ homolog subfamily A member 2 - ko04141; Genetic Information Processing; Folding, sorting and degradation; Protein processing in endoplasmic reticulum}	{At3g44110; KOG0712 Molecular chaperone (DnaJ superfamily) O Posttranslational modification, protein turnover, chaperones ;}	{GO:0006464; protein modification process; biological_process GO:0061630; NA GO:0031072; heat shock protein binding; molecular_function GO:0051082; unfolded protein binding; molecular_function GO:0016151; nickel ion binding; molecular_function}	{XM_018998719.1; PREDICTED: Juglans regia dnaJ protein homolog 2-like (LOC109016268), transcript variant X5, mRNA}	{PF16685:zinc RING finger of MSL2 PF01155:Hydrogenase/urease nickel incorporation, metallochaperone, hypA PF00684:DnaJ central domain}
transcript_HQ_AA_transcript10500/f3p0/3330	{KYP35701.1; DEAD-box ATP-dependent RNA helicase 37 [Cajanus cajan]}	{sp|Q84W89|RH37_ARATH; DEAD-box ATP-dependent RNA helicase 37 OS=Arabidopsis thaliana GN=RH37 PE=2 SV=2}	{nnu:104597630; K11594 DDX3X, bel ATP-dependent RNA helicase DDX3X 3.6.4.13 ko04622; Organismal Systems; Immune system; RIG-I-like receptor signaling pathway | ko05203; Human Diseases; Cancers: Overview; Viral carcinogenesis | ko05161; Human Diseases; Infectious diseases: Viral; Hepatitis B}	{At2g42520; KOG0335 ATP-dependent RNA helicase A RNA processing and modification ;}	{GO:0016787; hydrolase activity; molecular_function GO:0003676; nucleic acid binding; molecular_function GO:0005524; ATP binding; molecular_function GO:0003677; DNA binding; molecular_function}	{BT114860.1; Picea glauca clone GQ03603_M18 mRNA sequence}	{PF04851:Type III restriction enzyme, res subunit PF00270:DEAD/DEAH box helicase}
transcript_HQ_AA_transcript10506/f2p0/3327	{XP_004246177.1; PREDICTED: uncharacterized protein LOC101258685 [Solanum lycopersicum]}	{sp|P38456|YMF11_MARPO; Uncharacterized mitochondrial protein ymf11 OS=Marchantia polymorpha GN=YMF11 PE=4 SV=1}	{cann:107868800; - - - - -}	{At5g46920; KOG1075 FOG: Reverse transcriptase R General function prediction only ;}	{GO:0006397; mRNA processing; biological_process}	{BT110760.1; Picea glauca clone GQ03227_H19 mRNA sequence}	{PF01348:Type II intron maturase}
transcript_HQ_AA_transcript10509/f2p0/3320	{ADE75755.1; unknown [Picea sitchensis]}	{sp|P59326|YTHD1_MOUSE; YTH domain-containing family protein 1 OS=Mus musculus GN=Ythdf1 PE=1 SV=1}	{atr:18448943; K20102 YTHDF YTH domain-containing family protein - -}	{At1g48110; KOG1901 Uncharacterized high-glucose-regulated protein R General function prediction only ;}	{GO:0003723; RNA binding; molecular_function}	{XM_015832597.1; PREDICTED: Oryza brachyantha uncharacterized LOC102707720 (LOC102707720), transcript variant X2, mRNA}	{PF04146:YT521-B-like domain}
transcript_HQ_AA_transcript10515/f2p0/3329	{JAT54579.1; G1/S-specific cyclin pas1, partial [Anthurium amnicola]}	{sp|O14336|MUG80_SCHPO; Meiotically up-regulated gene 80 protein OS=Schizosaccharomyces pombe (strain 972 / ATCC 24843) GN=mug80 PE=1 SV=1}	{fve:101314715; - - - - -}	{NA}	{GO:0019901; protein kinase binding; molecular_function GO:0000079; regulation of cyclin-dependent protein kinase activity; biological_process}	{NA}	{PF08613:Cyclin}
transcript_HQ_AA_transcript10516/f2p0/3342	{XP_010276408.1; PREDICTED: uncharacterized protein LOC104611165 [Nelumbo nucifera]}	{NA}	{egr:104442846; - - - - -}	{NA}	{NA}	{NA}	{NA}
transcript_HQ_AA_transcript1052/f2p0/5679	{AQL10218.1; polymerase II transcription-mediator2, partial [Zea mays]}	{sp|Q2U513|SRB8_ASPOR; Mediator of RNA polymerase II transcription subunit 12 OS=Aspergillus oryzae (strain ATCC 42149 / RIB 40) GN=srb8 PE=3 SV=2}	{lang:109360524; - - - - -; lang:109360524; - - - - -}	{SPAC688.08; KOG4522 RNA polymerase II transcription mediator K Transcription ;}	{GO:0006357; regulation of transcription from RNA polymerase II promoter; biological_process GO:0016592; mediator complex; cellular_component GO:0001104; RNA polymerase II transcription cofactor activity; molecular_function}	{NA}	{PF09497:Transcription mediator complex subunit Med12}
transcript_HQ_AA_transcript10523/f8p0/3260	{XP_006853193.1; PREDICTED: lysine-specific histone demethylase 1 homolog 1 [Amborella trichopoda]}	{sp|Q9CAE3|FLD_ARATH; Protein FLOWERING LOCUS D OS=Arabidopsis thaliana GN=FLD PE=1 SV=1}	{atr:18442925; K11450 KDM1A, AOF2, LSD1 lysine-specific histone demethylase 1A 1.-.-.- -}	{At3g10390; KOG0029 Amine oxidase Q Secondary metabolites biosynthesis, transport and catabolism ;}	{GO:0005515; protein binding; molecular_function GO:0003857; 3-hydroxyacyl-CoA dehydrogenase activity; molecular_function GO:0055114; oxidation-reduction process; biological_process GO:0006631; fatty acid metabolic process; biological_process GO:0071949; FAD binding; molecular_function GO:0050660; flavin adenine dinucleotide binding; molecular_function GO:0008033; tRNA processing; biological_proc…	{XM_012225572.1; PREDICTED: Jatropha curcas protein FLOWERING LOCUS D (LOC105641102), mRNA}	{PF01593:Flavin containing amine oxidoreductase PF07992:Pyridine nucleotide-disulphide oxidoreductase PF01494:FAD binding domain PF02737:3-hydroxyacyl-CoA dehydrogenase, NAD binding domain PF01134:Glucose inhibited division protein A PF00070:Pyridine nucleotide-disulphide oxidoreductase PF01266:FAD dependent oxidoreductase PF12831:FAD dependent oxidoreductase PF04433:SWIRM domain}
transcript_HQ_AA_transcript10528/f2p0/3318	{ERN11151.1; hypothetical protein AMTR_s00024p00184500 [Amborella trichopoda]}	{sp|Q96DM3|MIC1_HUMAN; Uncharacterized protein C18orf8 OS=Homo sapiens GN=C18orf8 PE=1 SV=2}	{atr:18439340; - - - - -}	{At3g12010; KOG2377 Uncharacterized conserved protein S Function unknown ;}	{NA}	{NA}	{NA}
transcript_HQ_AA_transcript10532/f9p0/3285	{ABR17971.1; unknown [Picea sitchensis]}	{sp|Q8S9G8|SPL7_ARATH; Squamosa promoter-binding-like protein 7 OS=Arabidopsis thaliana GN=SPL7 PE=1 SV=2}	{atr:18446844; - - - - -}	{NA}	{GO:0005634; nucleus; cellular_component GO:0003677; DNA binding; molecular_function}	{EF678197.1; Picea sitchensis clone WS0283_B15 unknown mRNA}	{PF03110:SBP domain}
transcript_HQ_AA_transcript10533/f2p0/3354	{XP_016743922.1; PREDICTED: serine/threonine-protein phosphatase BSL1-like [Gossypium hirsutum]}	{sp|Q8L7U5|BSL1_ARATH; Serine/threonine-protein phosphatase BSL1 OS=Arabidopsis thaliana GN=BSL1 PE=1 SV=2}	{gra:105790462; K01090 E3.1.3.16 protein phosphatase 3.1.3.16 -}	{At4g03080_1; KOG0379 Kelch repeat-containing proteins R General function prediction only ;}	{GO:0003677; DNA binding; molecular_function GO:0005634; nucleus; cellular_component GO:0006310; DNA recombination; biological_process GO:0005515; protein binding; molecular_function GO:0016787; hydrolase activity; molecular_function}	{BT105039.1; Picea glauca clone GQ02817_O12 mRNA sequence}	{PF00149:Calcineurin-like phosphoesterase PF03089:Recombination activating protein 2 PF07646:Kelch motif PF01344:Kelch motif}
transcript_HQ_AA_transcript10536/f2p0/3316	{GAQ85521.1; putative exportin-2 [Klebsormidium flaccidum]}	{sp|P33307|CSE1_YEAST; Importin alpha re-exporter OS=Saccharomyces cerevisiae (strain ATCC 204508 / S288c) GN=CSE1 PE=1 SV=2}	{mis:MICPUN_97954; K18423 CSE1, CAS, XPO2 exportin-2 (importin alpha re-exporter) - -}	{YGL238w; KOG1992 Nuclear export receptor CSE1/CAS (importin beta superfamily) YU Nuclear structure ; Intracellular trafficking, secretion, and vesicular transport ;}	{GO:0005515; protein binding; molecular_function GO:0008536; Ran GTPase binding; molecular_function GO:0006886; intracellular protein transport; biological_process}	{NA}	{PF03378:CAS/CSE protein, C-terminus PF08506:Cse1 PF03810:Importin-beta N-terminal domain}
transcript_HQ_AA_transcript10538/f2p0/3353	{XP_010258880.1; PREDICTED: uncharacterized protein LOC104598491 isoform X1 [Nelumbo nucifera]}	{NA}	{nnu:104598491; - - - - -}	{NA}	{NA}	{BT106940.1; Picea glauca clone GQ03013_P10 mRNA sequence}	{NA}
transcript_HQ_AA_transcript10540/f2p0/3332	{JAT64573.1; Serine/threonine-protein kinase CLA4, partial [Anthurium amnicola]}	{sp|Q5APR8|CLA4_CANAL; Serine/threonine-protein kinase CLA4 OS=Candida albicans (strain SC5314 / ATCC MYA-2876) GN=CLA4 PE=1 SV=1}	{gsl:Gasu_01850; - - - - -}	{YNL298w; KOG0578 p21-activated serine/threonine protein kinase T Signal transduction mechanisms ;}	{GO:0006468; protein phosphorylation; biological_process GO:0004672; protein kinase activity; molecular_function GO:0005524; ATP binding; molecular_function}	{NA}	{PF07714:Protein tyrosine kinase PF00069:Protein kinase domain}
transcript_HQ_AA_transcript10541/f2p0/3324	{ABK24360.1; unknown [Picea sitchensis]}	{sp|Q9LKA4|UBA2C_ARATH; UBP1-associated protein 2C OS=Arabidopsis thaliana GN=UBA2C PE=2 SV=1}	{smo:SELMODRAFT_163608; K12741 HNRNPA1_3 heterogeneous nuclear ribonucleoprotein A1/A3 - ko03040; Genetic Information Processing; Transcription; Spliceosome}	{At3g15010; KOG0118 FOG: RRM domain R General function prediction only ;}	{GO:0003723; RNA binding; molecular_function GO:0003676; nucleic acid binding; molecular_function}	{BT102058.1; Picea glauca clone GQ0165_E23 mRNA sequence}	{PF00076:RNA recognition motif. (a.k.a. RRM, RBD, or RNP domain) PF08777:RNA binding motif PF16367:RNA recognition motif}
transcript_HQ_AA_transcript10543/f2p0/3339	{ADE76603.1; unknown [Picea sitchensis]}	{sp|Q9SY69|PPR29_ARATH; Pentatricopeptide repeat-containing protein At1g10270 OS=Arabidopsis thaliana GN=GRP23 PE=1 SV=1}	{mus:104000222; - - - - -}	{At1g10270; KOG4197 FOG: PPR repeat R General function prediction only ;}	{GO:0005515; protein binding; molecular_function GO:0009405; pathogenesis; biological_process GO:0005576; NA}	{NA}	{PF13176:Tetratricopeptide repeat PF03496:ADP-ribosyltransferase exoenzyme}
transcript_HQ_AA_transcript10546/f2p0/3317	{ABR16471.1; unknown [Picea sitchensis]}	{NA}	{ppp:PHYPADRAFT_208965; - - - - -}	{NA}	{NA}	{EF676574.1; Picea sitchensis clone WS02742_N02 unknown mRNA}	{NA}
transcript_HQ_AA_transcript10548/f2p0/3334	{XP_002308597.2; hypothetical protein POPTR_0006s25380g [Populus trichocarpa]}	{sp|O82318|Y2579_ARATH; Probably inactive leucine-rich repeat receptor-like protein kinase At2g25790 OS=Arabidopsis thaliana GN=At2g25790 PE=2 SV=1}	{nnu:104592077; - - - - -}	{NA}	{GO:0004672; protein kinase activity; molecular_function GO:0005515; protein binding; molecular_function GO:0006468; protein phosphorylation; biological_process GO:0005524; ATP binding; molecular_function}	{NA}	{PF13516:Leucine Rich repeat PF00069:Protein kinase domain PF00560:Leucine Rich Repeat PF13855:Leucine rich repeat PF07714:Protein tyrosine kinase}
transcript_HQ_AA_transcript10549/f3p0/3352	{ABR18099.1; unknown [Picea sitchensis]}	{sp|Q9CAD5|YODA_ARATH; Mitogen-activated protein kinase kinase kinase YODA OS=Arabidopsis thaliana GN=YDA PE=1 SV=1}	{atr:18438303; - - - - -}	{At1g63700; KOG0198 MEKK and related serine/threonine protein kinases T Signal transduction mechanisms ;}	{GO:0005524; ATP binding; molecular_function GO:0006468; protein phosphorylation; biological_process GO:0004672; protein kinase activity; molecular_function}	{XM_015771133.1; PREDICTED: Oryza sativa Japonica Group mitogen-activated protein kinase kinase kinase YODA (LOC4330249), transcript variant X2, mRNA}	{PF00069:Protein kinase domain PF07714:Protein tyrosine kinase}
transcript_HQ_AA_transcript10559/f4p0/3320	{ACN39879.1; unknown [Picea sitchensis]}	{sp|Q9LXV4|C3H56_ARATH; Zinc finger CCCH domain-containing protein 56 OS=Arabidopsis thaliana GN=At5g12850 PE=2 SV=1}	{nnu:104597421; - - - - -}	{At5g12850; KOG1595 CCCH-type Zn-finger protein R General function prediction only ;}	{GO:0046872; metal ion binding; molecular_function GO:0005515; protein binding; molecular_function}	{BT070363.1; Picea sitchensis clone WS02722_O11 unknown mRNA}	{PF13606:Ankyrin repeat PF00023:Ankyrin repeat PF00642:Zinc finger C-x8-C-x5-C-x3-H type (and similar)}
transcript_HQ_AA_transcript1056/f3p0/5662	{XP_006845593.1; PREDICTED: uncharacterized protein LOC18435486 [Amborella trichopoda]}	{sp|Q9FPR3|EDR1_ARATH; Serine/threonine-protein kinase EDR1 OS=Arabidopsis thaliana GN=EDR1 PE=1 SV=1}	{atr:18435486; - - - - -}	{At5g57610_2; KOG0192 Tyrosine kinase specific for activated (GTP-bound) p21cdc42Hs T Signal transduction mechanisms ;}	{GO:0005524; ATP binding; molecular_function GO:0004672; protein kinase activity; molecular_function GO:0005515; protein binding; molecular_function GO:0006468; protein phosphorylation; biological_process}	{XM_016345438.1; PREDICTED: Arachis ipaensis flippase kinase 1 (LOC107642117), transcript variant X2, mRNA}	{PF07714:Protein tyrosine kinase PF00069:Protein kinase domain PF00564:PB1 domain}
transcript_HQ_AA_transcript10560/f3p0/3322	{XP_011627471.1; PREDICTED: probable LRR receptor-like serine/threonine-protein kinase At1g67720 [Amborella trichopoda]}	{sp|C0LGI2|Y1677_ARATH; Probable LRR receptor-like serine/threonine-protein kinase At1g67720 OS=Arabidopsis thaliana GN=At1g67720 PE=2 SV=1}	{nnu:104594742; - - - - -}	{NA}	{GO:0005524; ATP binding; molecular_function GO:0004672; protein kinase activity; molecular_function GO:0006468; protein phosphorylation; biological_process GO:0005515; protein binding; molecular_function}	{BT104989.1; Picea glauca clone GQ02817_G13 mRNA sequence}	{PF00069:Protein kinase domain PF07714:Protein tyrosine kinase PF13855:Leucine rich repeat PF00560:Leucine Rich Repeat}
transcript_HQ_AA_transcript10565/f2p0/3309	{NA}	{NA}	{NA}	{NA}	{GO:0005515; protein binding; molecular_function}	{NA}	{PF00008:EGF-like domain}
transcript_HQ_AA_transcript10566/f2p0/3313	{JAT54579.1; G1/S-specific cyclin pas1, partial [Anthurium amnicola]}	{sp|O14336|MUG80_SCHPO; Meiotically up-regulated gene 80 protein OS=Schizosaccharomyces pombe (strain 972 / ATCC 24843) GN=mug80 PE=1 SV=1}	{fve:101314715; - - - - -}	{NA}	{GO:0000079; regulation of cyclin-dependent protein kinase activity; biological_process GO:0019901; protein kinase binding; molecular_function}	{NA}	{PF08613:Cyclin}
transcript_HQ_AA_transcript10567/f3p0/3322	{XP_005848930.1; hypothetical protein CHLNCDRAFT_51602 [Chlorella variabilis]}	{sp|Q04500|UTP14_YEAST; U3 small nucleolar RNA-associated protein 14 OS=Saccharomyces cerevisiae (strain ATCC 204508 / S288c) GN=UTP14 PE=1 SV=1}	{cvr:CHLNCDRAFT_51602; K14567 UTP14 U3 small nucleolar RNA-associated protein 14 - ko03008; Genetic Information Processing; Translation; Ribosome biogenesis in eukaryotes}	{YML093w; KOG2172 Uncharacterized conserved protein S Function unknown ;}	{GO:0006364; rRNA processing; biological_process GO:0032040; small-subunit processome; cellular_component}	{NA}	{PF04615:Utp14 protein}
transcript_HQ_AA_transcript1057/f2p0/5647	{NA}	{NA}	{NA}	{NA}	{GO:0005759; mitochondrial matrix; cellular_component GO:0003870; 5-aminolevulinate synthase activity; molecular_function GO:0030170; pyridoxal phosphate binding; molecular_function GO:0006778; porphyrin metabolic process; biological_process}	{NA}	{PF09029:5-aminolevulinate synthase presequence}
transcript_HQ_AA_transcript10574/f3p0/3331	{XP_013469438.1; papain family cysteine protease [Medicago truncatula]}	{sp|Q8VYS0|RD19D_ARATH; Probable cysteine protease RD19D OS=Arabidopsis thaliana GN=RD19D PE=2 SV=1}	{cam:101500737; K01373 CTSF cathepsin F 3.4.22.41 ko04142; Cellular Processes; Transport and catabolism; Lysosome | ko04210; Cellular Processes; Cell growth and death; Apoptosis}	{At3g54940; KOG1542 Cysteine proteinase Cathepsin F O Posttranslational modification, protein turnover, chaperones ;}	{NA}	{BT123620.1; Picea sitchensis clone WS04715_F15 unknown mRNA}	{NA}
transcript_HQ_AA_transcript10577/f5p0/3310	{XP_006492948.1; PREDICTED: nuclear pore complex protein NUP93A [Citrus sinensis]}	{sp|G0S024|NIC96_CHATD; Nucleoporin NIC96 OS=Chaetomium thermophilum (strain DSM 1495 / CBS 144.50 / IMI 039719) GN=NIC96 PE=1 SV=1}	{gsl:Gasu_56480; K14309 NUP93, NIC96 nuclear pore complex protein Nup93 - ko03013; Genetic Information Processing; Translation; RNA transport}	{YFR002w; KOG2168 Cullins D Cell cycle control, cell division, chromosome partitioning ;}	{GO:0005643; nuclear pore; cellular_component GO:0006810; transport; biological_process}	{NA}	{PF04097:Nup93/Nic96}
transcript_HQ_AA_transcript10578/f6p0/3262	{XP_006840561.1; PREDICTED: kinesin-13A [Amborella trichopoda]}	{sp|Q940B8|KN13A_ARATH; Kinesin-like protein KIN-13A OS=Arabidopsis thaliana GN=KIN13A PE=1 SV=1}	{nnu:104598962; K10393 KIF2_24, MCAK kinesin family member 2/24 - -}	{At3g16630; KOG0246 Kinesin-like protein Z Cytoskeleton ;}	{GO:0008017; microtubule binding; molecular_function GO:0007018; microtubule-based movement; biological_process GO:0015074; DNA integration; biological_process GO:0003677; DNA binding; molecular_function GO:0005524; ATP binding; molecular_function GO:0003777; microtubule motor activity; molecular_function}	{BT123886.1; Picea sitchensis clone WS04718_G02 unknown mRNA}	{PF00225:Kinesin motor domain PF02899:Phage integrase, N-terminal SAM-like domain PF16796:Microtubule binding}
transcript_HQ_AA_transcript10579/f2p0/3310	{XP_004513856.1; PREDICTED: uncharacterized protein LOC101510562 [Cicer arietinum]}	{sp|O22943|STL1_ARATH; Probable glycosyltransferase STELLO1 OS=Arabidopsis thaliana GN=STL1 PE=1 SV=1}	{nnu:104597368; - - - - -}	{NA}	{NA}	{BT108404.1; Picea glauca clone GQ03121_G06 mRNA sequence}	{NA}
transcript_HQ_AA_transcript10580/f7p0/3258	{XP_012846699.1; PREDICTED: uncharacterized protein LOC105966652 [Erythranthe guttata]}	{sp|Q9LME6|MBD8_ARATH; Methyl-CpG-binding domain-containing protein 8 OS=Arabidopsis thaliana GN=MBD8 PE=2 SV=1}	{atr:18442920; - - - - -}	{NA}	{GO:0003677; DNA binding; molecular_function GO:0005634; nucleus; cellular_component GO:0046872; metal ion binding; molecular_function}	{NA}	{PF13912:C2H2-type zinc finger PF02892:BED zinc finger PF01429:Methyl-CpG binding domain PF13465:Zinc-finger double domain}
transcript_HQ_AA_transcript10581/f2p0/3370	{XP_001765541.1; predicted protein [Physcomitrella patens]}	{sp|P94078|MANA1_ARATH; Alpha-mannosidase At3g26720 OS=Arabidopsis thaliana GN=At3g26720 PE=1 SV=1}	{ppp:PHYPADRAFT_229613; K01191 E3.2.1.24 alpha-mannosidase 3.2.1.24 ko00511; Metabolism; Glycan biosynthesis and metabolism; Other glycan degradation}	{At3g26720; KOG1959 Glycosyl hydrolase, family 38 - alpha-mannosidase G Carbohydrate transport and metabolism ;}	{GO:0015923; mannosidase activity; molecular_function GO:0006013; mannose metabolic process; biological_process GO:0005975; carbohydrate metabolic process; biological_process GO:0008270; zinc ion binding; molecular_function GO:0004553; hydrolase activity, hydrolyzing O-glycosyl compounds; molecular_function GO:0004559; alpha-mannosidase activity; molecular_function}	{BT106658.1; Picea glauca clone GQ03007_G11 mRNA sequence}	{PF09261:Alpha mannosidase middle domain PF01074:Glycosyl hydrolases family 38 N-terminal domain PF07748:Glycosyl hydrolases family 38 C-terminal domain}
transcript_HQ_AA_transcript10582/f2p0/3327	{ACN39846.1; unknown [Picea sitchensis]}	{sp|Q9SB64|NBR1_ARATH; Protein NBR1 homolog OS=Arabidopsis thaliana GN=NBR1 PE=1 SV=1}	{nnu:104593082; K17987 NBR1 next to BRCA1 gene 1 protein - -}	{At4g24690_2; KOG4351 Uncharacterized conserved protein S Function unknown ;}	{GO:0008270; zinc ion binding; molecular_function GO:0005515; protein binding; molecular_function}	{BT117527.1; Picea glauca clone GQ03902_F22 mRNA sequence}	{PF00564:PB1 domain PF00569:Zinc finger, ZZ type}
transcript_HQ_AA_transcript10584/f2p0/3339	{XP_006854546.1; PREDICTED: exocyst complex component SEC5A [Amborella trichopoda]}	{sp|F4HWE6|SEC5B_ARATH; Exocyst complex component SEC5B OS=Arabidopsis thaliana GN=SEC5B PE=1 SV=1}	{atr:18444309; K17637 EXOC2, SEC5 exocyst complex component 2 - ko04014; Environmental Information Processing; Signal transduction; Ras signaling pathway}	{At1g21170; KOG2347 Sec5 subunit of exocyst complex U Intracellular trafficking, secretion, and vesicular transport ;}	{NA}	{BT107949.1; Picea glauca clone GQ03114_O13 mRNA sequence}	{NA}
transcript_HQ_AA_transcript10586/f6p0/3298	{XP_010276037.1; PREDICTED: microtubule-associated protein TORTIFOLIA1-like [Nelumbo nucifera]}	{sp|Q9T041|TOR1_ARATH; Microtubule-associated protein TORTIFOLIA1 OS=Arabidopsis thaliana GN=TOR1 PE=1 SV=2}	{atr:18447963; - - - - -}	{NA}	{GO:0051090; regulation of sequence-specific DNA binding transcription factor activity; biological_process GO:0016192; vesicle-mediated transport; biological_process GO:0005515; protein binding; molecular_function GO:0005634; nucleus; cellular_component GO:0006886; intracellular protein transport; biological_process GO:0030117; membrane coat; cellular_component}	{BT107962.1; Picea glauca clone GQ03115_C02 mRNA sequence}	{PF02985:HEAT repeat PF01602:Adaptin N terminal region PF07571:TAF6 C-terminal HEAT repeat domain}
transcript_HQ_AA_transcript10589/f3p0/3314	{XP_006845116.2; PREDICTED: protein STRUBBELIG-RECEPTOR FAMILY 8 [Amborella trichopoda]}	{sp|Q6R2J8|SRF8_ARATH; Protein STRUBBELIG-RECEPTOR FAMILY 8 OS=Arabidopsis thaliana GN=SRF8 PE=2 SV=1}	{atr:18434996; - - - - -}	{At4g22130; KOG1187 Serine/threonine protein kinase T Signal transduction mechanisms ;}	{GO:0006468; protein phosphorylation; biological_process GO:0005515; protein binding; molecular_function GO:0004672; protein kinase activity; molecular_function GO:0016021; integral to membrane; cellular_component GO:0005524; ATP binding; molecular_function}	{BT119771.1; Picea glauca clone GQ04109_N17 mRNA sequence}	{PF13516:Leucine Rich repeat PF00069:Protein kinase domain PF00560:Leucine Rich Repeat PF13855:Leucine rich repeat PF05808:Podoplanin PF07714:Protein tyrosine kinase}
transcript_HQ_AA_transcript1059/f3p0/5721	{XP_006838906.1; PREDICTED: ARF guanine-nucleotide exchange factor GNOM [Amborella trichopoda]}	{sp|Q42510|GNOM_ARATH; ARF guanine-nucleotide exchange factor GNOM OS=Arabidopsis thaliana GN=GN PE=1 SV=1}	{jcu:105630489; K18443 GBF1 golgi-specific brefeldin A-resistance guanine nucleotide exchange factor 1 - ko04144; Cellular Processes; Transport and catabolism; Endocytosis}	{At1g13980; KOG0928 Pattern-formation protein/guanine nucleotide exchange factor U Intracellular trafficking, secretion, and vesicular transport ;}	{GO:0032012; regulation of ARF protein signal transduction; biological_process GO:0005086; ARF guanyl-nucleotide exchange factor activity; molecular_function}	{XM_006591289.2; PREDICTED: Glycine max ARF guanine-nucleotide exchange factor GNOM-like (LOC100789153), transcript variant X3, mRNA}	{PF01369:Sec7 domain}
transcript_HQ_AA_transcript10595/f7p0/3309	{XP_006830091.1; PREDICTED: serine/threonine protein phosphatase 2A 59 kDa regulatory subunit B' gamma isoform [Amborella trichopoda]}	{sp|Q8RW96|2A5G_ARATH; Serine/threonine protein phosphatase 2A 59 kDa regulatory subunit B' gamma isoform OS=Arabidopsis thaliana GN=B'GAMMA PE=1 SV=2}	{nnu:104594080; K11584 PPP2R5 serine/threonine-protein phosphatase 2A regulatory subunit B' - ko03015; Genetic Information Processing; Translation; mRNA surveillance pathway | ko04071; Environmental Information Processing; Signal transduction; Sphingolipid signaling pathway | ko04151; Environmental Information Processing; Signal transduction; PI3K-Akt signaling pathway | ko04152; Environmental In…	{At4g15410_2; KOG2085 Serine/threonine protein phosphatase 2A, regulatory subunit T Signal transduction mechanisms ;}	{GO:0007165; signal transduction; biological_process GO:0019888; protein phosphatase regulator activity; molecular_function GO:0000159; protein phosphatase type 2A complex; cellular_component}	{BT107954.1; Picea glauca clone GQ03115_A09 mRNA sequence}	{PF01603:Protein phosphatase 2A regulatory B subunit (B56 family)}
transcript_HQ_AA_transcript10597/f2p0/3319	{ABR17501.1; unknown [Picea sitchensis]}	{sp|P93050|RKF3_ARATH; Probable LRR receptor-like serine/threonine-protein kinase RKF3 OS=Arabidopsis thaliana GN=RKF3 PE=2 SV=1}	{atr:18435707; - - - - -}	{At2g48010; KOG1187 Serine/threonine protein kinase T Signal transduction mechanisms ;}	{GO:0006468; protein phosphorylation; biological_process GO:0004672; protein kinase activity; molecular_function GO:0005524; ATP binding; molecular_function}	{XM_012979809.1; PREDICTED: Erythranthe guttatus probable LRR receptor-like serine/threonine-protein kinase At5g48740 (LOC105955995), mRNA}	{PF00069:Protein kinase domain PF07714:Protein tyrosine kinase}
transcript_HQ_AA_transcript10598/f2p0/3334	{OMO72849.1; hypothetical protein CCACVL1_17557 [Corchorus capsularis]}	{sp|P39866|NIA2_PHAVU; Nitrate reductase [NADH] 2 OS=Phaseolus vulgaris GN=NIA2 PE=3 SV=1}	{gra:105786148; K10534 NR nitrate reductase (NAD(P)H) [EC:1.7.1.1 1.7.1.2 1.7.1.3] 1.7.1.1,1.7.1.2,1.7.1.3 ko00910; Metabolism; Energy metabolism; Nitrogen metabolism}	{At1g77760_1; KOG0535 Sulfite oxidase, molybdopterin-binding component C Energy production and conversion ;}	{GO:0030151; molybdenum ion binding; molecular_function GO:0016491; oxidoreductase activity; molecular_function GO:0055114; oxidation-reduction process; biological_process}	{XM_004953998.1; PREDICTED: Setaria italica nitrate reductase [NAD(P)H] (LOC101754380), mRNA}	{PF08030:Ferric reductase NAD binding domain PF03404:Mo-co oxidoreductase dimerisation domain PF00175:Oxidoreductase NAD-binding domain }
transcript_HQ_AA_transcript106/f3p0/7541	{XP_010242484.1; PREDICTED: sister chromatid cohesion 1 protein 4 [Nelumbo nucifera]}	{sp|Q8W1Y0|SSC14_ARATH; Sister chromatid cohesion 1 protein 4 OS=Arabidopsis thaliana GN=SYN4 PE=2 SV=1}	{vvi:100263480; K06670 SCC1, MCD1, RAD21 cohesin complex subunit SCC1 - ko04110; Cellular Processes; Cell growth and death; Cell cycle | ko04111; Cellular Processes; Cell growth and death; Cell cycle - yeast}	{At5g16270; KOG1213 Sister chromatid cohesion complex Cohesin, subunit RAD21/SCC1 D Cell cycle control, cell division, chromosome partitioning ;}	{GO:0000228; nuclear chromosome; cellular_component GO:0005515; protein binding; molecular_function}	{EF678721.1; Picea sitchensis clone WS0296_B08 unknown mRNA}	{PF04824:Conserved region of Rad21 / Rec8 like protein PF04825:N terminus of Rad21 / Rec8 like protein}
transcript_HQ_AA_transcript10600/f4p0/3270	{OAE33372.1; hypothetical protein AXG93_3296s1110 [Marchantia polymorpha subsp. polymorpha]}	{sp|Q9LUS2|TC120_ARATH; Translocase of chloroplast 120, chloroplastic OS=Arabidopsis thaliana GN=TOC120 PE=1 SV=1}	{cic:CICLE_v100301612m; - - - - -}	{NA}	{GO:0003924; GTPase activity; molecular_function GO:0006810; transport; biological_process GO:0007264; small GTPase mediated signal transduction; biological_process GO:0005524; ATP binding; molecular_function GO:0005525; GTP binding; molecular_function}	{NA}	{PF00735:Septin PF00071:Ras family PF04548:AIG1 family PF01926:50S ribosome-binding GTPase PF03193:Protein of unknown function, DUF258 PF00437:Type II/IV secretion system protein PF04670:Gtr1/RagA G protein conserved region PF02421:Ferrous iron transport protein B}
transcript_HQ_AA_transcript10601/f3p0/3299	{OMO72849.1; hypothetical protein CCACVL1_17557 [Corchorus capsularis]}	{sp|P43101|NIA_CICIN; Nitrate reductase [NADH] OS=Cichorium intybus GN=NIA PE=2 SV=1}	{gra:105786148; K10534 NR nitrate reductase (NAD(P)H) [EC:1.7.1.1 1.7.1.2 1.7.1.3] 1.7.1.1,1.7.1.2,1.7.1.3 ko00910; Metabolism; Energy metabolism; Nitrogen metabolism}	{At1g77760_1; KOG0535 Sulfite oxidase, molybdopterin-binding component C Energy production and conversion ;}	{GO:0042128; nitrate assimilation; biological_process GO:0055114; oxidation-reduction process; biological_process GO:0016491; oxidoreductase activity; molecular_function GO:0030151; molybdenum ion binding; molecular_function}	{XM_002454580.1; Sorghum bicolor hypothetical protein, mRNA}	{PF08030:Ferric reductase NAD binding domain PF00174:Oxidoreductase molybdopterin binding domain PF03404:Mo-co oxidoreductase dimerisation domain PF00175:Oxidoreductase NAD-binding domain }
transcript_HQ_AA_transcript10603/f2p0/3322	{ABR18181.1; unknown [Picea sitchensis]}	{sp|F4IDQ5|JASON_ARATH; Protein JASON OS=Arabidopsis thaliana GN=JASON PE=2 SV=1}	{ini:109161566; - - - - -}	{NA}	{NA}	{NA}	{NA}
transcript_HQ_AA_transcript10607/f8p0/3283	{XP_006851844.1; PREDICTED: uncharacterized protein LOC18441552 [Amborella trichopoda]}	{NA}	{atr:18441552; - - - - -}	{NA}	{NA}	{BT104390.1; Picea glauca clone GQ02809_N12 mRNA sequence}	{NA}
transcript_HQ_AA_transcript10608/f2p0/3405	{XP_010276674.1; PREDICTED: rho GTPase-activating protein 7 [Nelumbo nucifera]}	{sp|Q8RWQ4|RGAP7_ARATH; Rho GTPase-activating protein 7 OS=Arabidopsis thaliana GN=ROPGAP7 PE=2 SV=1}	{atr:18444601; - - - - -}	{At5g12150; KOG4271 Rho-GTPase activating protein T Signal transduction mechanisms ;}	{GO:0005852; eukaryotic translation initiation factor 3 complex; cellular_component GO:0003743; translation initiation factor activity; molecular_function GO:0005737; cytoplasm; cellular_component GO:0007165; signal transduction; biological_process}	{XM_015834413.1; PREDICTED: Oryza brachyantha rho GTPase-activating protein 7-like (LOC102703855), mRNA}	{PF08597:Translation initiation factor eIF3 subunit PF00620:RhoGAP domain}
transcript_HQ_AA_transcript10611/f2p0/3311	{XP_010258735.1; PREDICTED: GATA transcription factor 26-like [Nelumbo nucifera]}	{sp|Q8W4H1|GAT26_ARATH; GATA transcription factor 26 OS=Arabidopsis thaliana GN=GATA26 PE=2 SV=1}	{nnu:104598397; - - - - -}	{At4g17570; KOG1601 GATA-4/5/6 transcription factors K Transcription ;}	{GO:0016491; oxidoreductase activity; molecular_function GO:0003700; sequence-specific DNA binding transcription factor activity; molecular_function GO:0006355; regulation of transcription, DNA-dependent; biological_process GO:0043565; sequence-specific DNA binding; molecular_function GO:0008270; zinc ion binding; molecular_function GO:0046872; metal ion binding; molecular_function GO:0055114; ox…	{BT123321.1; Picea sitchensis clone WS04711_O08 unknown mRNA}	{PF00320:GATA zinc finger PF02915:Rubrerythrin}
transcript_HQ_AA_transcript10612/f4p0/3306	{XP_010270433.1; PREDICTED: probable inactive ATP-dependent zinc metalloprotease FTSHI 4, chloroplastic [Nelumbo nucifera]}	{sp|F4KF14|FTSI4_ARATH; Probable inactive ATP-dependent zinc metalloprotease FTSHI 4, chloroplastic OS=Arabidopsis thaliana GN=FTSHI4 PE=1 SV=1}	{egu:105038501; - - - - -}	{At5g64580; KOG0731 AAA+-type ATPase containing the peptidase M41 domain O Posttranslational modification, protein turnover, chaperones ;}	{GO:0006310; DNA recombination; biological_process GO:0008134; transcription factor binding; molecular_function GO:0006281; DNA repair; biological_process GO:0016887; ATPase activity; molecular_function GO:0005524; ATP binding; molecular_function GO:0003678; DNA helicase activity; molecular_function GO:0006508; proteolysis; biological_process GO:0009378; four-way junction helicase activity; molec…	{XM_010914324.2; PREDICTED: Elaeis guineensis probable inactive ATP-dependent zinc metalloprotease FTSHI 4, chloroplastic (LOC105038501), mRNA}	{PF06068:TIP49 C-terminus PF07724:AAA domain (Cdc48 subfamily) PF00158:Sigma-54 interaction domain PF01695:IstB-like ATP binding protein PF02367:Threonylcarbamoyl adenosine biosynthesis protein TsaE PF07728:AAA domain (dynein-related subfamily) PF05496:Holliday junction DNA helicase ruvB N-terminus PF01434:Peptidase family M41 PF00004:ATPase family associated with various cellular activities (AAA…
transcript_HQ_AA_transcript10613/f2p0/3314	{XP_001762011.1; predicted protein [Physcomitrella patens]}	{sp|Q8R3N1|NOP14_MOUSE; Nucleolar protein 14 OS=Mus musculus GN=Nop14 PE=1 SV=2}	{ppp:PHYPADRAFT_181805; K14766 NOP14, UTP2 nucleolar protein 14 - -}	{At1g69070; KOG2147 Nucleolar protein involved in 40S ribosome biogenesis J Translation, ribosomal structure and biogenesis ;}	{GO:0004673; protein histidine kinase activity; molecular_function GO:0032040; small-subunit processome; cellular_component}	{BT111715.1; Picea glauca clone GQ03302_J12 mRNA sequence}	{PF07536:HWE histidine kinase PF04147:Nop14-like family }
transcript_HQ_AA_transcript10618/f2p0/3323	{XP_006430070.1; hypothetical protein CICLE_v10011038mg [Citrus clementina]}	{sp|Q9NXF1|TEX10_HUMAN; Testis-expressed protein 10 OS=Homo sapiens GN=TEX10 PE=1 SV=2}	{ini:109172969; K14827 IPI1, TEX10 pre-rRNA-processing protein IPI1 - -}	{At5g06350; KOG2149 Uncharacterized conserved protein S Function unknown ;}	{GO:0005576; NA GO:0008083; growth factor activity; molecular_function GO:0005136; interleukin-4 receptor binding; molecular_function GO:0006955; immune response; biological_process}	{NA}	{PF00727:Interleukin 4}
transcript_HQ_AA_transcript1062/f2p0/5681	{NA}	{NA}	{NA}	{NA}	{NA}	{NA}	{NA}
transcript_HQ_AA_transcript10621/f2p0/3341	{XP_006838503.1; PREDICTED: nucleolin [Amborella trichopoda]}	{sp|Q7TMK9|HNRPQ_MOUSE; Heterogeneous nuclear ribonucleoprotein Q OS=Mus musculus GN=Syncrip PE=1 SV=2}	{egu:105043793; - - - - -}	{HsM5453806; KOG0117 Heterogeneous nuclear ribonucleoprotein R (RRM superfamily) A RNA processing and modification ;}	{GO:0003676; nucleic acid binding; molecular_function GO:0003723; RNA binding; molecular_function}	{NA}	{PF08777:RNA binding motif PF00076:RNA recognition motif. (a.k.a. RRM, RBD, or RNP domain) PF16367:RNA recognition motif}
transcript_HQ_AA_transcript10622/f2p0/3371	{XP_010260590.1; PREDICTED: probable protein S-acyltransferase 19 [Nelumbo nucifera]}	{sp|Q8L5Y5|ZDH17_ARATH; Probable protein S-acyltransferase 19 OS=Arabidopsis thaliana GN=PAT19 PE=2 SV=1}	{nnu:104599666; K20027 ZDHHC1_11 palmitoyltransferase ZDHHC1/11 2.3.1.225 -}	{At4g15080; KOG1311 DHHC-type Zn-finger proteins R General function prediction only ;}	{NA}	{BT102864.1; Picea glauca clone GQ0201_O13 mRNA sequence}	{NA}
transcript_HQ_AA_transcript10624/f2p0/3307	{XP_006850656.1; PREDICTED: transmembrane protein 209 [Amborella trichopoda]}	{NA}	{atr:18440450; - - - - -}	{At1g07970; KOG4670 Uncharacterized conserved membrane protein S Function unknown ;}	{NA}	{NA}	{NA}
transcript_HQ_AA_transcript10626/f2p0/3303	{XP_008387208.1; PREDICTED: DEAD-box ATP-dependent RNA helicase 37-like [Malus domestica]}	{sp|Q6Z4K6|RH52B_ORYSJ; DEAD-box ATP-dependent RNA helicase 52B OS=Oryza sativa subsp. japonica GN=PL10B PE=2 SV=1}	{mdm:103449657; K11594 DDX3X, bel ATP-dependent RNA helicase DDX3X 3.6.4.13 ko04622; Organismal Systems; Immune system; RIG-I-like receptor signaling pathway | ko05203; Human Diseases; Cancers: Overview; Viral carcinogenesis | ko05161; Human Diseases; Infectious diseases: Viral; Hepatitis B}	{At3g58570; KOG0335 ATP-dependent RNA helicase A RNA processing and modification ;}	{GO:0005524; ATP binding; molecular_function GO:0003676; nucleic acid binding; molecular_function}	{XM_016720790.1; PREDICTED: Capsicum annuum DEAD-box ATP-dependent RNA helicase 11-like (LOC107873823), transcript variant X7, mRNA}	{PF00270:DEAD/DEAH box helicase}
transcript_HQ_AA_transcript10627/f3p0/3307	{XP_012843006.1; PREDICTED: tetratricopeptide repeat protein 27 [Erythranthe guttata]}	{sp|O36033|YLM1_SCHPO; TPR repeat-containing protein C19B12.01 OS=Schizosaccharomyces pombe (strain 972 / ATCC 24843) GN=SPAC19B12.01 PE=4 SV=2}	{ccp:CHC_T00000665001; - - - - -}	{YNL313c; KOG1128 Uncharacterized conserved protein, contains TPR repeats R General function prediction only ;}	{GO:0005515; protein binding; molecular_function}	{NA}	{PF13181:Tetratricopeptide repeat PF00515:Tetratricopeptide repeat PF13414:TPR repeat PF13176:Tetratricopeptide repeat PF13371:Tetratricopeptide repeat}
transcript_HQ_AA_transcript10628/f2p0/3317	{XP_010254149.1; PREDICTED: heat shock 70 kDa protein 15-like [Nelumbo nucifera]}	{sp|F4HQD4|HSP7P_ARATH; Heat shock 70 kDa protein 15 OS=Arabidopsis thaliana GN=HSP70-15 PE=1 SV=1}	{nnu:104595227; K09489 HSPA4 heat shock 70kDa protein 4 - ko04530; Cellular Processes; Cellular community - eukaryotes; Tight junction | ko04612; Organismal Systems; Immune system; Antigen processing and presentation}	{At1g79930; KOG0103 Molecular chaperones HSP105/HSP110/SSE1, HSP70 superfamily O Posttranslational modification, protein turnover, chaperones ;}	{GO:0000902; cell morphogenesis; biological_process}	{BT070679.1; Picea sitchensis clone WS02743_I22 unknown mRNA}	{PF06723:MreB/Mbl protein}
transcript_HQ_AA_transcript1063/f3p0/5654	{XP_006855799.1; PREDICTED: putative uncharacterized protein At4g01020, chloroplastic [Amborella trichopoda]}	{sp|F4KGU4|DEAHC_ARATH; ATP-dependent RNA helicase DEAH12, chloroplastic OS=Arabidopsis thaliana GN=At5g10370 PE=3 SV=1}	{atr:18445601; K12818 DHX8, PRP22 ATP-dependent RNA helicase DHX8/PRP22 3.6.4.13 ko03040; Genetic Information Processing; Transcription; Spliceosome}	{At5g10370_1; KOG0922 DEAH-box RNA helicase A RNA processing and modification ;}	{GO:0008270; zinc ion binding; molecular_function GO:0046872; metal ion binding; molecular_function GO:0004386; helicase activity; molecular_function GO:0005515; protein binding; molecular_function GO:0003676; nucleic acid binding; molecular_function GO:0005524; ATP binding; molecular_function GO:0016887; ATPase activity; molecular_function}	{BT116658.1; Picea glauca clone GQ03804_B09 mRNA sequence}	{PF04408:Helicase associated domain (HA2) PF00076:RNA recognition motif. (a.k.a. RRM, RBD, or RNP domain) PF00097:Zinc finger, C3HC4 type (RING finger) PF13639:Ring finger domain PF00005:ABC transporter PF00270:DEAD/DEAH box helicase}
transcript_HQ_AA_transcript10631/f2p0/3350	{OMO58062.1; Arf GTPase activating protein [Corchorus olitorius]}	{sp|Q8RXE7|AGD14_ARATH; Probable ADP-ribosylation factor GTPase-activating protein AGD14 OS=Arabidopsis thaliana GN=AGD14 PE=1 SV=2}	{nnu:104595241; - - - - -}	{At1g08680; KOG0702 Predicted GTPase-activating protein T Signal transduction mechanisms ;}	{GO:0005622; intracellular; cellular_component GO:0005096; GTPase activator activity; molecular_function GO:0008270; zinc ion binding; molecular_function}	{XM_010658050.2; PREDICTED: Vitis vinifera probable ADP-ribosylation factor GTPase-activating protein AGD14 (LOC100249171), transcript variant X2, mRNA}	{PF00643:B-box zinc finger PF01412:Putative GTPase activating protein for Arf}
transcript_HQ_AA_transcript10635/f2p0/3341	{ONK57742.1; uncharacterized protein A4U43_C09F3630 [Asparagus officinalis]}	{sp|P60300|CLCG_ARATH; Putative chloride channel-like protein CLC-g OS=Arabidopsis thaliana GN=CBSCLC6 PE=3 SV=2}	{pda:103704786; K05016 CLCN7 chloride channel 7 - -}	{At5g49890; KOG0474 Cl- channel CLC-7 and related proteins (CLC superfamily) P Inorganic ion transport and metabolism ;}	{GO:0005247; voltage-gated chloride channel activity; molecular_function GO:0006821; chloride transport; biological_process GO:0016020; membrane; cellular_component GO:0055085; transmembrane transport; biological_process}	{XM_006647320.2; PREDICTED: Oryza brachyantha chloride channel protein CLC-c-like (LOC102718800), transcript variant X2, mRNA}	{PF00654:Voltage gated chloride channel}
transcript_HQ_AA_transcript10637/f5p0/3306	{XP_006851722.1; PREDICTED: nucleobase-ascorbate transporter 12 [Amborella trichopoda]}	{sp|Q3E7D0|NAT12_ARATH; Nucleobase-ascorbate transporter 12 OS=Arabidopsis thaliana GN=NAT12 PE=1 SV=3}	{atr:18441428; K14611 SLC23A1_2, SVCT1_2 solute carrier family 23 (nucleobase transporter), member 1/2 - -}	{At2g27810; KOG1292 Xanthine/uracil transporters F Nucleotide transport and metabolism ;}	{GO:0015689; molybdate ion transport; biological_process GO:0055085; transmembrane transport; biological_process GO:0016020; membrane; cellular_component GO:0015098; molybdate ion transmembrane transporter activity; molecular_function GO:0006810; transport; biological_process GO:0005215; NA}	{BT107746.1; Picea glauca clone GQ03112_D18 mRNA sequence}	{PF00860:Permease family PF16983:Molybdate transporter of MFS superfamily}
transcript_HQ_AA_transcript10642/f3p0/3288	{XP_006827919.1; PREDICTED: protein transport protein SEC23 [Amborella trichopoda]}	{sp|Q4PE39|SEC23_USTMA; Protein transport protein SEC23 OS=Ustilago maydis (strain 521 / FGSC 9021) GN=SEC23 PE=3 SV=1}	{pda:103708383; K14006 SEC23 protein transport protein SEC23 - ko04141; Genetic Information Processing; Folding, sorting and degradation; Protein processing in endoplasmic reticulum}	{At3g23660; KOG1986 Vesicle coat complex COPII, subunit SEC23 U Intracellular trafficking, secretion, and vesicular transport ;}	{GO:0008270; zinc ion binding; molecular_function GO:0006888; ER to Golgi vesicle-mediated transport; biological_process GO:0006886; intracellular protein transport; biological_process GO:0030127; COPII vesicle coat; cellular_component}	{BT112359.1; Picea glauca clone GQ03313_N20 mRNA sequence}	{PF04811:Sec23/Sec24 trunk domain PF04810:Sec23/Sec24 zinc finger PF04815:Sec23/Sec24 helical domain}
transcript_HQ_AA_transcript10644/f2p0/3314	{NA}	{sp|Q06839|YP097_YEAST; PX domain-containing protein YPR097W OS=Saccharomyces cerevisiae (strain ATCC 204508 / S288c) GN=YPR097W PE=1 SV=2}	{NA}	{YPR097w; KOG2273 Membrane coat complex Retromer, subunit VPS5/SNX1, Sorting nexins, and related PX domain-containing proteins U Intracellular trafficking, secretion, and vesicular transport ;}	{GO:0035091; phosphatidylinositol binding; molecular_function}	{NA}	{PF00787:PX domain}
transcript_HQ_AA_transcript10645/f3p0/3314	{XP_010250915.1; PREDICTED: uncharacterized protein LOC104593008 [Nelumbo nucifera]}	{sp|Q98TX3|PDCD4_CHICK; Programmed cell death protein 4 OS=Gallus gallus GN=PDCD4 PE=2 SV=1}	{nnu:104593008; - - - - -}	{At5g63190; KOG0403 Neoplastic transformation suppressor Pdcd4/MA-3, contains MA3 domain T Signal transduction mechanisms ;}	{GO:0019888; protein phosphatase regulator activity; molecular_function GO:0007165; signal transduction; biological_process GO:0000159; protein phosphatase type 2A complex; cellular_component}	{BT119717.1; Picea glauca clone GQ04109_D17 mRNA sequence}	{PF01603:Protein phosphatase 2A regulatory B subunit (B56 family)}
transcript_HQ_AA_transcript10647/f2p0/3298	{ACN40645.1; unknown [Picea sitchensis]}	{sp|Q14624|ITIH4_HUMAN; Inter-alpha-trypsin inhibitor heavy chain H4 OS=Homo sapiens GN=ITIH4 PE=1 SV=4}	{mdm:103447901; - - - - -}	{NA}	{GO:0004842; ubiquitin-protein ligase activity; molecular_function GO:0005515; protein binding; molecular_function GO:0046872; metal ion binding; molecular_function GO:0005680; anaphase-promoting complex; cellular_component GO:0008270; zinc ion binding; molecular_function}	{BT071173.1; Picea sitchensis clone WS02776_F08 unknown mRNA}	{PF14634:zinc-RING finger domain PF12678:RING-H2 zinc finger domain PF00628:PHD-finger PF17123:RING-like zinc finger PF13639:Ring finger domain PF12861:Anaphase-promoting complex subunit 11 RING-H2 finger PF00097:Zinc finger, C3HC4 type (RING finger)}
transcript_HQ_AA_transcript10650/f2p0/3308	{EOY03576.1; U-box domain-containing protein isoform 1 [Theobroma cacao]}	{sp|Q9LF41|UBE4_ARATH; Probable ubiquitin conjugation factor E4 OS=Arabidopsis thaliana GN=PUB1 PE=2 SV=1}	{rcu:8281267; K10597 UBE4B, UFD2 ubiquitin conjugation factor E4 B 2.3.2.27 ko04141; Genetic Information Processing; Folding, sorting and degradation; Protein processing in endoplasmic reticulum | ko04120; Genetic Information Processing; Folding, sorting and degradation; Ubiquitin mediated proteolysis}	{At5g15400; KOG2042 Ubiquitin fusion degradation protein-2 O Posttranslational modification, protein turnover, chaperones ;}	{GO:0031145; anaphase-promoting complex-dependent proteasomal ubiquitin-dependent protein catabolic process; biological_process GO:0000151; ubiquitin ligase complex; cellular_component GO:0016567; protein ubiquitination; biological_process GO:0051082; unfolded protein binding; molecular_function GO:0006511; ubiquitin-dependent protein catabolic process; biological_process GO:0004842; ubiquitin-pr…	{NA}	{PF04564:U-box domain PF10471:Anaphase-promoting complex APC subunit CDC26 PF10408:Ubiquitin elongating factor core PF03938:Outer membrane protein (OmpH-like)}
transcript_HQ_AA_transcript10652/f3p0/3377	{XP_010249146.1; PREDICTED: uncharacterized protein LOC104591805 isoform X2 [Nelumbo nucifera]}	{sp|Q5BIM2|F214B_BOVIN; Protein FAM214B OS=Bos taurus GN=FAM214B PE=2 SV=1}	{atr:18434426; - - - - -}	{At3g26890; KOG2306 Uncharacterized conserved protein S Function unknown ;}	{NA}	{BT103901.1; Picea glauca clone GQ02803_O16 mRNA sequence}	{NA}
transcript_HQ_AA_transcript10656/f18p0/3265	{GAQ90706.1; hypothetical protein KFL_006760045 [Klebsormidium flaccidum]}	{sp|A0A0D2YG01|FUB8_FUSO4; Non-canonical non-ribosomal peptide synthetase FUB8 OS=Fusarium oxysporum f. sp. lycopersici (strain 4287 / CBS 123668 / FGSC 9935 / NRRL 34936) GN=FUB8 PE=1 SV=1}	{bpg:Bathy14g02980; - - - - -}	{YBR115c; KOG1178 Non-ribosomal peptide synthetase/alpha-aminoadipate reductase and related enzymes Q Secondary metabolites biosynthesis, transport and catabolism ;}	{GO:0006694; steroid biosynthetic process; biological_process GO:0009089; lysine biosynthetic process via diaminopimelate; biological_process GO:0008152; NA GO:0008839; dihydrodipicolinate reductase activity; molecular_function GO:0016616; oxidoreductase activity, acting on the CH-OH group of donors, NAD or NADP as acceptor; molecular_function GO:0055114; oxidation-reduction process; biological_p…	{NA}	{PF00501:AMP-binding enzyme PF01073:3-beta hydroxysteroid dehydrogenase/isomerase family PF01370:NAD dependent epimerase/dehydratase family PF01113:Dihydrodipicolinate reductase, N-terminus}
transcript_HQ_AA_transcript10669/f5p0/3258	{XP_010241959.1; PREDICTED: uncharacterized protein LOC104586426 isoform X2 [Nelumbo nucifera]}	{sp|P73625|MUTS2_SYNY3; Endonuclease MutS2 OS=Synechocystis sp. (strain PCC 6803 / Kazusa) GN=mutS2 PE=3 SV=1}	{var:108347773; K07456 mutS2 DNA mismatch repair protein MutS2 - ko03430; Genetic Information Processing; Replication and repair; Mismatch repair}	{NA}	{GO:0030983; mismatched DNA binding; molecular_function GO:0003690; double-stranded DNA binding; molecular_function GO:0005524; ATP binding; molecular_function GO:0042262; DNA protection; biological_process GO:0006298; mismatch repair; biological_process}	{NA}	{PF07352:Bacteriophage Mu Gam like protein PF00488:MutS domain V}
transcript_HQ_AA_transcript10673/f2p0/3370	{XP_001774871.1; predicted protein [Physcomitrella patens]}	{sp|Q9SVP7|PP307_ARATH; Pentatricopeptide repeat-containing protein At4g13650 OS=Arabidopsis thaliana GN=PCMP-H42 PE=2 SV=2}	{atr:105421361; - - - - -}	{At4g13650; KOG4197 FOG: PPR repeat R General function prediction only ;}	{GO:0006886; intracellular protein transport; biological_process GO:0006417; regulation of translation; biological_process GO:0008270; zinc ion binding; molecular_function GO:0016192; vesicle-mediated transport; biological_process GO:0045182; NA}	{BT105283.1; Picea glauca clone GQ02820_I07 mRNA sequence}	{PF17049:ATPase expression protein 1 PF00637:Region in Clathrin and VPS PF14432:DYW family of nucleic acid deaminases}
transcript_HQ_AA_transcript10676/f3p0/3298	{ABR16455.1; unknown [Picea sitchensis]}	{sp|F4KFT7|TENAC_ARATH; Bifunctional TH2 protein, mitochondrial OS=Arabidopsis thaliana GN=TH2 PE=1 SV=1}	{atr:18444102; - - - - -}	{NA}	{NA}	{EF676556.1; Picea sitchensis clone WS02742_A22 unknown mRNA}	{NA}
transcript_HQ_AA_transcript10677/f2p0/3326	{XP_010936356.1; PREDICTED: pentatricopeptide repeat-containing protein At3g29290 [Elaeis guineensis]}	{sp|Q84J46|PP262_ARATH; Pentatricopeptide repeat-containing protein At3g29290 OS=Arabidopsis thaliana GN=EMB2076 PE=2 SV=1}	{pda:103709263; - - - - -}	{At3g29290; KOG4197 FOG: PPR repeat R General function prediction only ;}	{NA}	{NA}	{NA}
transcript_HQ_AA_transcript10678/f33p0/3179	{XP_002523907.1; PREDICTED: elongation factor 2 [Ricinus communis]}	{sp|Q9ASR1|EF2_ARATH; Elongation factor 2 OS=Arabidopsis thaliana GN=LOS1 PE=1 SV=1}	{rcu:8263373; K03234 EEF2 elongation factor 2 - ko04152; Environmental Information Processing; Signal transduction; AMPK signaling pathway | ko04921; Organismal Systems; Endocrine system; Oxytocin signaling pathway}	{At1g56075; KOG0469 Elongation factor 2 J Translation, ribosomal structure and biogenesis ;}	{GO:0005525; GTP binding; molecular_function}	{BT117972.1; Picea glauca clone GQ03919_C06 mRNA sequence}	{PF03764:Elongation factor G, domain IV PF03144:Elongation factor Tu domain 2 PF01926:50S ribosome-binding GTPase}
transcript_HQ_AA_transcript10681/f6p0/3302	{XP_019708356.1; PREDICTED: pectinesterase-like [Elaeis guineensis]}	{sp|P85076|PME_ACTDE; Pectinesterase OS=Actinidia deliciosa PE=1 SV=1}	{mus:103970465; K01051 E3.1.1.11 pectinesterase 3.1.1.11 ko00040; Metabolism; Carbohydrate metabolism; Pentose and glucuronate interconversions}	{NA}	{GO:0004650; polygalacturonase activity; molecular_function GO:0030695; GTPase regulator activity; molecular_function GO:0005975; carbohydrate metabolic process; biological_process}	{NA}	{PF02188:GoLoco motif PF00295:Glycosyl hydrolases family 28}
transcript_HQ_AA_transcript10682/f2p0/3309	{XP_011627573.1; PREDICTED: protein ACCUMULATION AND REPLICATION OF CHLOROPLASTS 3 [Amborella trichopoda]}	{sp|Q6F6B5|ARC3_ARATH; Protein ACCUMULATION AND REPLICATION OF CHLOROPLASTS 3 OS=Arabidopsis thaliana GN=ARC3 PE=1 SV=2}	{atr:18445375; - - - - -}	{At1g75010; KOG0231 Junctional membrane complex protein Junctophilin and related MORN repeat proteins R General function prediction only ;}	{GO:0006355; regulation of transcription, DNA-dependent; biological_process GO:0005634; nucleus; cellular_component}	{XM_015720986.1; PREDICTED: Ricinus communis protein ACCUMULATION AND REPLICATION OF CHLOROPLASTS 3 (LOC8283307), transcript variant X6, mRNA}	{PF04153:NOT2 / NOT3 / NOT5 family}
transcript_HQ_AA_transcript10686/f4p0/3302	{ABR18099.1; unknown [Picea sitchensis]}	{sp|Q9CAD5|YODA_ARATH; Mitogen-activated protein kinase kinase kinase YODA OS=Arabidopsis thaliana GN=YDA PE=1 SV=1}	{nnu:104591149; - - - - -}	{At1g63700; KOG0198 MEKK and related serine/threonine protein kinases T Signal transduction mechanisms ;}	{GO:0004672; protein kinase activity; molecular_function GO:0006468; protein phosphorylation; biological_process GO:0005524; ATP binding; molecular_function}	{EF678337.1; Picea sitchensis clone WS02915_N13 unknown mRNA}	{PF07714:Protein tyrosine kinase PF00069:Protein kinase domain}
transcript_HQ_AA_transcript10688/f3p0/3315	{XP_001770740.1; predicted protein [Physcomitrella patens]}	{sp|P94078|MANA1_ARATH; Alpha-mannosidase At3g26720 OS=Arabidopsis thaliana GN=At3g26720 PE=1 SV=1}	{ppp:PHYPADRAFT_229613; K01191 E3.2.1.24 alpha-mannosidase 3.2.1.24 ko00511; Metabolism; Glycan biosynthesis and metabolism; Other glycan degradation}	{At3g26720; KOG1959 Glycosyl hydrolase, family 38 - alpha-mannosidase G Carbohydrate transport and metabolism ;}	{GO:0004559; alpha-mannosidase activity; molecular_function GO:0004553; hydrolase activity, hydrolyzing O-glycosyl compounds; molecular_function GO:0008270; zinc ion binding; molecular_function GO:0005975; carbohydrate metabolic process; biological_process GO:0006013; mannose metabolic process; biological_process GO:0015923; mannosidase activity; molecular_function}	{BT106658.1; Picea glauca clone GQ03007_G11 mRNA sequence}	{PF07748:Glycosyl hydrolases family 38 C-terminal domain PF09261:Alpha mannosidase middle domain PF01074:Glycosyl hydrolases family 38 N-terminal domain}
transcript_HQ_AA_transcript10689/f2p0/3321	{XP_010270170.1; PREDICTED: zinc finger CCCH domain-containing protein 18-like isoform X2 [Nelumbo nucifera]}	{sp|Q9SJ41|C3H18_ARATH; Zinc finger CCCH domain-containing protein 18 OS=Arabidopsis thaliana GN=At2g05160 PE=2 SV=1}	{nnu:104594206; - - - - -}	{NA}	{GO:0046872; metal ion binding; molecular_function GO:0003676; nucleic acid binding; molecular_function}	{XM_016633960.1; PREDICTED: Nicotiana tabacum zinc finger CCCH domain-containing protein 18-like (LOC107809356), transcript variant X2, mRNA}	{PF00076:RNA recognition motif. (a.k.a. RRM, RBD, or RNP domain) PF00642:Zinc finger C-x8-C-x5-C-x3-H type (and similar)}
transcript_HQ_AA_transcript10691/f3p0/3308	{XP_010685628.1; PREDICTED: alpha-glucan phosphorylase, H isozyme [Beta vulgaris subsp. vulgaris]}	{sp|P32811|PHSH_SOLTU; Alpha-glucan phosphorylase, H isozyme OS=Solanum tuberosum PE=1 SV=1}	{egu:105046284; K00688 PYG, glgP glycogen phosphorylase 2.4.1.1 ko00500; Metabolism; Carbohydrate metabolism; Starch and sucrose metabolism | ko02026; Cellular Processes; Cellular community - prokaryotes; Biofilm formation - Escherichia coli | ko04910; Organismal Systems; Endocrine system; Insulin signaling pathway | ko04922; Organismal Systems; Endocrine system; Glucagon signaling pathway | ko04…	{At3g46970; KOG2099 Glycogen phosphorylase G Carbohydrate transport and metabolism ;}	{GO:0005975; carbohydrate metabolic process; biological_process GO:0008184; glycogen phosphorylase activity; molecular_function}	{BT119940.1; Picea glauca clone GQ04112_N08 mRNA sequence}	{PF00343:Carbohydrate phosphorylase}
transcript_HQ_AA_transcript10692/f7p0/3219	{ABK24373.1; unknown [Picea sitchensis]}	{sp|Q9SCV4|BGAL8_ARATH; Beta-galactosidase 8 OS=Arabidopsis thaliana GN=BGAL8 PE=2 SV=2}	{nnu:104594825; - - - - -}	{At2g28470; KOG0496 Beta-galactosidase G Carbohydrate transport and metabolism ;}	{GO:0004553; hydrolase activity, hydrolyzing O-glycosyl compounds; molecular_function GO:0030246; carbohydrate binding; molecular_function GO:0004565; beta-galactosidase activity; molecular_function GO:0009341; beta-galactosidase complex; cellular_component GO:0005975; carbohydrate metabolic process; biological_process}	{EF085065.1; Picea sitchensis clone WS0287_M07 unknown mRNA}	{PF02140:Galactose binding lectin domain PF02449:Beta-galactosidase PF02837:Glycosyl hydrolases family 2, sugar binding domain}
transcript_HQ_AA_transcript10694/f5p0/3282	{ACN40645.1; unknown [Picea sitchensis]}	{sp|Q14624|ITIH4_HUMAN; Inter-alpha-trypsin inhibitor heavy chain H4 OS=Homo sapiens GN=ITIH4 PE=1 SV=4}	{nnu:104594889; - - - - -}	{NA}	{GO:0008270; zinc ion binding; molecular_function GO:0005680; anaphase-promoting complex; cellular_component GO:0046872; metal ion binding; molecular_function GO:0005515; protein binding; molecular_function GO:0004842; ubiquitin-protein ligase activity; molecular_function}	{NA}	{PF12678:RING-H2 zinc finger domain PF14634:zinc-RING finger domain PF00628:PHD-finger PF17123:RING-like zinc finger PF13639:Ring finger domain PF00097:Zinc finger, C3HC4 type (RING finger) PF12861:Anaphase-promoting complex subunit 11 RING-H2 finger}
transcript_HQ_AA_transcript10695/f6p0/3271	{XP_002278845.1; PREDICTED: mediator of RNA polymerase II transcription subunit 25 [Vitis vinifera]}	{sp|Q7XYY2|MED25_ARATH; Mediator of RNA polymerase II transcription subunit 25 OS=Arabidopsis thaliana GN=MED25 PE=1 SV=1}	{vvi:100259509; K15168 MED25 mediator of RNA polymerase II transcription subunit 25 - -}	{NA}	{GO:0016020; membrane; cellular_component GO:0009306; protein secretion; biological_process GO:0016485; protein processing; biological_process GO:0008855; exodeoxyribonuclease VII activity; molecular_function GO:0004190; aspartic-type endopeptidase activity; molecular_function GO:0016021; integral to membrane; cellular_component}	{BT108921.1; Picea glauca clone GQ03202_I16 mRNA sequence}	{PF02601:Exonuclease VII, large subunit PF00813:FliP family PF01080:Presenilin}
transcript_HQ_AA_transcript10699/f3p0/3312	{NA}	{sp|O74915|YJ74_SCHPO; Uncharacterized transcriptional regulatory protein C757.04 OS=Schizosaccharomyces pombe (strain 972 / ATCC 24843) GN=SPCC757.04 PE=3 SV=2}	{NA}	{NA}	{GO:0005634; nucleus; cellular_component GO:0000981; sequence-specific DNA binding RNA polymerase II transcription factor activity; molecular_function GO:0008270; zinc ion binding; molecular_function GO:0006355; regulation of transcription, DNA-dependent; biological_process GO:0003677; DNA binding; molecular_function GO:0006351; transcription, DNA-dependent; biological_process}	{NA}	{PF00172:Fungal Zn(2)-Cys(6) binuclear cluster domain PF04082:Fungal specific transcription factor domain }
transcript_HQ_AA_transcript1071/f4p0/5630	{ABK25348.1; unknown [Picea sitchensis]}	{sp|Q6YYC0|C3H55_ORYSJ; Zinc finger CCCH domain-containing protein 55 OS=Oryza sativa subsp. japonica GN=Os08g0135800 PE=2 SV=1}	{nnu:104597922; - - - - -}	{NA}	{GO:0018024; histone-lysine N-methyltransferase activity; molecular_function GO:0005694; chromosome; cellular_component GO:0046872; metal ion binding; molecular_function GO:0034968; histone lysine methylation; biological_process GO:0006396; RNA processing; biological_process GO:0003723; RNA binding; molecular_function GO:0006355; regulation of transcription, DNA-dependent; biological_process}	{BT119657.1; Picea glauca clone GQ04108_H04 mRNA sequence}	{PF00642:Zinc finger C-x8-C-x5-C-x3-H type (and similar) PF01805:Surp module PF08236:SRI (Set2 Rpb1 interacting) domain}
transcript_HQ_AA_transcript10711/f2p0/3292	{OAE20299.1; hypothetical protein AXG93_4888s1070 [Marchantia polymorpha subsp. polymorpha]}	{sp|Q8L6H7|SFR2_ORYSJ; Beta-glucosidase-like SFR2, chloroplastic OS=Oryza sativa subsp. japonica GN=SFR2 PE=2 SV=1}	{smo:SELMODRAFT_935; K21362 - - 2.4.1.184 -}	{At3g06510; KOG0626 Beta-glucosidase, lactase phlorizinhydrolase, and related proteins G Carbohydrate transport and metabolism ;}	{GO:0005975; carbohydrate metabolic process; biological_process GO:0004553; hydrolase activity, hydrolyzing O-glycosyl compounds; molecular_function}	{NA}	{PF00232:Glycosyl hydrolase family 1 PF00150:Cellulase (glycosyl hydrolase family 5)}
transcript_HQ_AA_transcript10714/f2p0/3322	{NA}	{NA}	{NA}	{NA}	{NA}	{NA}	{NA}
transcript_HQ_AA_transcript10717/f2p0/3324	{XP_017969418.1; PREDICTED: alpha-mannosidase [Theobroma cacao]}	{sp|C0HJB3|MANA_CANEN; Alpha-mannosidase OS=Canavalia ensiformis PE=1 SV=1}	{gmx:100775419; K01191 E3.2.1.24 alpha-mannosidase 3.2.1.24 ko00511; Metabolism; Glycan biosynthesis and metabolism; Other glycan degradation}	{At3g26720; KOG1959 Glycosyl hydrolase, family 38 - alpha-mannosidase G Carbohydrate transport and metabolism ;}	{GO:0008270; zinc ion binding; molecular_function GO:0004553; hydrolase activity, hydrolyzing O-glycosyl compounds; molecular_function GO:0004559; alpha-mannosidase activity; molecular_function GO:0005975; carbohydrate metabolic process; biological_process GO:0015923; mannosidase activity; molecular_function GO:0006013; mannose metabolic process; biological_process}	{XM_010921831.2; PREDICTED: Elaeis guineensis alpha-mannosidase-like (LOC105044052), transcript variant X2, mRNA}	{PF07748:Glycosyl hydrolases family 38 C-terminal domain PF09261:Alpha mannosidase middle domain PF01074:Glycosyl hydrolases family 38 N-terminal domain}
transcript_HQ_AA_transcript10719/f3p0/3320	{XP_006826301.1; PREDICTED: YTH domain-containing family protein 1 isoform X1 [Amborella trichopoda]}	{sp|P59326|YTHD1_MOUSE; YTH domain-containing family protein 1 OS=Mus musculus GN=Ythdf1 PE=1 SV=1}	{pmum:103321408; K20102 YTHDF YTH domain-containing family protein - -}	{At3g13460; KOG1901 Uncharacterized high-glucose-regulated protein R General function prediction only ;}	{GO:0003723; RNA binding; molecular_function GO:0016485; protein processing; biological_process GO:0004190; aspartic-type endopeptidase activity; molecular_function GO:0016021; integral to membrane; cellular_component}	{XR_002163785.1; PREDICTED: Elaeis guineensis YTH domain-containing family protein 2 (LOC105036247), transcript variant X3, misc_RNA}	{PF04146:YT521-B-like domain PF01080:Presenilin}
transcript_HQ_AA_transcript1072/f2p0/5642	{XP_010253731.1; PREDICTED: uncharacterized protein LOC104594889 [Nelumbo nucifera]}	{sp|Q55874|Y103_SYNY3; Uncharacterized protein sll0103 OS=Synechocystis sp. (strain PCC 6803 / Kazusa) GN=sll0103 PE=4 SV=1}	{nnu:104594889; - - - - -}	{NA}	{GO:0005515; protein binding; molecular_function GO:0046872; metal ion binding; molecular_function GO:0008270; zinc ion binding; molecular_function GO:0005680; anaphase-promoting complex; cellular_component GO:0004842; ubiquitin-protein ligase activity; molecular_function}	{BT122272.1; Picea sitchensis clone WS0442_M05 unknown mRNA}	{PF12861:Anaphase-promoting complex subunit 11 RING-H2 finger PF00097:Zinc finger, C3HC4 type (RING finger) PF17123:RING-like zinc finger PF00628:PHD-finger PF13639:Ring finger domain PF14634:zinc-RING finger domain PF12678:RING-H2 zinc finger domain}
transcript_HQ_AA_transcript10721/f2p0/3282	{NA}	{NA}	{NA}	{NA}	{NA}	{NA}	{NA}
transcript_HQ_AA_transcript10723/f3p0/3372	{XP_006846225.2; PREDICTED: ribonuclease II, chloroplastic/mitochondrial [Amborella trichopoda]}	{sp|Q6NQJ6|RNR1_ARATH; Ribonuclease II, chloroplastic/mitochondrial OS=Arabidopsis thaliana GN=RNR1 PE=2 SV=1}	{atr:18436139; - - - - -}	{At5g02250; KOG2102 Exosomal 3'-5' exoribonuclease complex, subunit Rrp44/Dis3 J Translation, ribosomal structure and biogenesis ;}	{NA}	{NA}	{NA}
transcript_HQ_AA_transcript1073/f2p0/5638	{XP_011625969.1; PREDICTED: uncharacterized protein LOC18441373 [Amborella trichopoda]}	{NA}	{atr:18441373; - - - - -}	{NA}	{NA}	{NA}	{NA}
transcript_HQ_AA_transcript10731/f3p0/3303	{XP_002971282.1; hypothetical protein SELMODRAFT_411870 [Selaginella moellendorffii]}	{sp|Q94AM9|CID4_ARATH; Polyadenylate-binding protein-interacting protein 4 OS=Arabidopsis thaliana GN=CID4 PE=2 SV=1}	{atr:18444930; - - - - -}	{At3g14010; KOG2375 Protein interacting with poly(A)-binding protein A RNA processing and modification ;}	{NA}	{BT114597.1; Picea glauca clone GQ03517_K10 mRNA sequence}	{NA}
transcript_HQ_AA_transcript10735/f35p0/3203	{ERN02039.1; hypothetical protein AMTR_s00045p00120010 [Amborella trichopoda]}	{sp|Q498E7|SMAL1_XENLA; SWI/SNF-related matrix-associated actin-dependent regulator of chromatin subfamily A-like protein 1 OS=Xenopus laevis GN=smarcal1 PE=2 SV=1}	{sind:105158701; K14440 SMARCAL1, HARP SWI/SNF-related matrix-associated actin-dependent regulator of chromatin subfamily A-like protein 1 3.6.4.12 -}	{At1g48310; KOG1000 Chromatin remodeling protein HARP/SMARCAL1, DEAD-box superfamily B Chromatin structure and dynamics ;}	{GO:0016787; hydrolase activity; molecular_function GO:0003677; DNA binding; molecular_function GO:0005524; ATP binding; molecular_function}	{XM_008225273.2; PREDICTED: Prunus mume SWI/SNF-related matrix-associated actin-dependent regulator of chromatin subfamily A-like protein 1 (LOC103323288), transcript variant X1, mRNA}	{PF04851:Type III restriction enzyme, res subunit PF00176:SNF2 family N-terminal domain}
transcript_HQ_AA_transcript10738/f2p0/3284	{ONK76931.1; uncharacterized protein A4U43_C02F1370 [Asparagus officinalis]}	{sp|Q9FWQ5|HAC12_ARATH; Histone acetyltransferase HAC12 OS=Arabidopsis thaliana GN=HAC12 PE=2 SV=2}	{atr:18439537; K04498 EP300, CREBBP, KAT3 E1A/CREB-binding protein 2.3.1.48 ko04310; Environmental Information Processing; Signal transduction; Wnt signaling pathway | ko04330; Environmental Information Processing; Signal transduction; Notch signaling pathway | ko04350; Environmental Information Processing; Signal transduction; TGF-beta signaling pathway | ko04630; Environmental Information Proce…	{At1g16710; KOG1778 CREB binding protein/P300 and related TAZ Zn-finger proteins K Transcription ;}	{NA}	{AM446464.2; Vitis vinifera contig VV78X096741.3, whole genome shotgun sequence}	{NA}
transcript_HQ_AA_transcript1074/f3p0/5647	{XP_010528878.1; PREDICTED: mitogen-activated protein kinase kinase kinase ANP1 isoform X1 [Tarenaya hassleriana]}	{sp|Q10407|MKH1_SCHPO; MAP kinase kinase kinase mkh1 OS=Schizosaccharomyces pombe (strain 972 / ATCC 24843) GN=mkh1 PE=3 SV=1}	{thj:104805874; K20606 ANP1 mitogen-activated protein kinase kinase kinase ANP1 2.7.11.25 ko04016; Environmental Information Processing; Signal transduction; MAPK signaling pathway - plant}	{SPAC1F3.02c; KOG0198 MEKK and related serine/threonine protein kinases T Signal transduction mechanisms ;}	{GO:0005524; ATP binding; molecular_function GO:0016020; membrane; cellular_component GO:0016773; phosphotransferase activity, alcohol group as acceptor; molecular_function GO:0004672; protein kinase activity; molecular_function GO:0006468; protein phosphorylation; biological_process}	{NA}	{PF00069:Protein kinase domain PF06293:Lipopolysaccharide kinase (Kdo/WaaP) family PF07714:Protein tyrosine kinase}
transcript_HQ_AA_transcript10746/f3p0/3292	{ADE77055.1; unknown [Picea sitchensis]}	{sp|Q6VWJ6|WRK46_HORVU; WRKY transcription factor SUSIBA2 OS=Hordeum vulgare GN=WRKY46 PE=1 SV=1}	{nnu:104594328; K18835 WRKY2 WRKY transcription factor 2 - ko04626; Organismal Systems; Environmental adaptation; Plant-pathogen interaction}	{NA}	{GO:0043565; sequence-specific DNA binding; molecular_function GO:0003700; sequence-specific DNA binding transcription factor activity; molecular_function GO:0006355; regulation of transcription, DNA-dependent; biological_process}	{BT102978.1; Picea glauca clone GQ0204_F05 mRNA sequence}	{PF03106:WRKY DNA -binding domain}
transcript_HQ_AA_transcript10747/f4p0/3293	{BAK02010.1; predicted protein [Hordeum vulgare subsp. vulgare]}	{sp|P33775|PMT1_YEAST; Dolichyl-phosphate-mannose--protein mannosyltransferase 1 OS=Saccharomyces cerevisiae (strain ATCC 204508 / S288c) GN=PMT1 PE=1 SV=1}	{cme:CYME_CMR221C; K00728 POMT dolichyl-phosphate-mannose-protein mannosyltransferase 2.4.1.109 ko00515; Metabolism; Glycan biosynthesis and metabolism; Mannose type O-glycan biosynthesis | ko00514; Metabolism; Glycan biosynthesis and metabolism; Other types of O-glycan biosynthesis}	{YDL095w; KOG3359 Dolichyl-phosphate-mannose:protein O-mannosyl transferase O Posttranslational modification, protein turnover, chaperones ;}	{GO:0000030; mannosyltransferase activity; molecular_function GO:0006493; protein O-linked glycosylation; biological_process GO:0016020; membrane; cellular_component}	{NA}	{PF02366:Dolichyl-phosphate-mannose-protein mannosyltransferase PF02815:MIR domain}
transcript_HQ_AA_transcript10748/f2p0/3291	{ABR17501.1; unknown [Picea sitchensis]}	{sp|P93050|RKF3_ARATH; Probable LRR receptor-like serine/threonine-protein kinase RKF3 OS=Arabidopsis thaliana GN=RKF3 PE=2 SV=1}	{atr:18435707; - - - - -}	{At2g48010; KOG1187 Serine/threonine protein kinase T Signal transduction mechanisms ;}	{GO:0005524; ATP binding; molecular_function GO:0006468; protein phosphorylation; biological_process GO:0004672; protein kinase activity; molecular_function}	{XM_012979809.1; PREDICTED: Erythranthe guttatus probable LRR receptor-like serine/threonine-protein kinase At5g48740 (LOC105955995), mRNA}	{PF07714:Protein tyrosine kinase PF00069:Protein kinase domain}
transcript_HQ_AA_transcript10749/f2p0/3291	{BAJ99339.1; predicted protein [Hordeum vulgare subsp. vulgare]}	{sp|P07038|PMA1_NEUCR; Plasma membrane ATPase OS=Neurospora crassa (strain ATCC 24698 / 74-OR23-1A / CBS 708.71 / DSM 1257 / FGSC 987) GN=pma-1 PE=1 SV=1}	{jcu:105631300; K01535 PMA1, PMA2 H+-transporting ATPase 3.6.3.6 ko00190; Metabolism; Energy metabolism; Oxidative phosphorylation}	{YGL008c; KOG0205 Plasma membrane H+-transporting ATPase P Inorganic ion transport and metabolism ;}	{GO:0046872; metal ion binding; molecular_function GO:0000166; nucleotide binding; molecular_function}	{BT101918.1; Picea glauca clone GQ0133_F23 mRNA sequence}	{PF00122:E1-E2 ATPase}
transcript_HQ_AA_transcript1075/f2p0/5622	{XP_010279201.1; PREDICTED: apoptosis inhibitor 5-like protein API5 isoform X3 [Nelumbo nucifera]}	{sp|Q6Z6S1|API5_ORYSJ; Apoptosis inhibitor 5-like protein API5 OS=Oryza sativa subsp. japonica GN=API5 PE=1 SV=1}	{vvi:100248777; - - - - -}	{At1g29030; KOG2213 Apoptosis inhibitor 5/fibroblast growth factor 2-interacting factor 2, and related proteins T Signal transduction mechanisms ;}	{NA}	{BT119230.1; Picea glauca clone GQ04102_N13 mRNA sequence}	{NA}
transcript_HQ_AA_transcript10753/f8p0/3286	{XP_010915873.1; PREDICTED: chaperone protein ClpB1 [Elaeis guineensis]}	{sp|Q6F2Y7|CLPB1_ORYSJ; Chaperone protein ClpB1 OS=Oryza sativa subsp. japonica GN=CLPB1 PE=2 SV=1}	{egu:105040848; K03695 clpB ATP-dependent Clp protease ATP-binding subunit ClpB - ko04213; Organismal Systems; Aging; Longevity regulating pathway - multiple species}	{At1g74310; KOG1051 Chaperone HSP104 and related ATP-dependent Clp proteases O Posttranslational modification, protein turnover, chaperones ;}	{GO:0003723; RNA binding; molecular_function GO:0006355; regulation of transcription, DNA-dependent; biological_process GO:0006810; transport; biological_process GO:0009378; four-way junction helicase activity; molecular_function GO:0042729; DASH complex; cellular_component GO:0008855; exodeoxyribonuclease VII activity; molecular_function GO:0007264; small GTPase mediated signal transduction; bio…	{BT119088.1; Picea glauca clone GQ04101_F06 mRNA sequence}	{PF05496:Holliday junction DNA helicase ruvB N-terminus PF04851:Type III restriction enzyme, res subunit PF01695:IstB-like ATP binding protein PF06309:Torsin PF08477:Ras of Complex, Roc, domain of DAPkinase PF03193:Protein of unknown function, DUF258 PF02601:Exonuclease VII, large subunit PF01105:emp24/gp25L/p24 family/GOLD PF04504:Protein of unknown function, DUF573 PF07726:ATPase family associa…
transcript_HQ_AA_transcript10754/f6p0/3286	{ABR16103.1; unknown [Picea sitchensis]}	{sp|Q9SZA7|DRL29_ARATH; Probable disease resistance protein At4g33300 OS=Arabidopsis thaliana GN=At4g33300 PE=2 SV=3}	{pop:POPTR_0002s13070g; - - - - -}	{NA}	{GO:0043531; ADP binding; molecular_function}	{NA}	{PF00931:NB-ARC domain}
transcript_HQ_AA_transcript10758/f2p0/3308	{XP_010276256.1; PREDICTED: chaperone protein ClpB1 [Nelumbo nucifera]}	{sp|Q6F2Y7|CLPB1_ORYSJ; Chaperone protein ClpB1 OS=Oryza sativa subsp. japonica GN=CLPB1 PE=2 SV=1}	{egu:105040848; K03695 clpB ATP-dependent Clp protease ATP-binding subunit ClpB - ko04213; Organismal Systems; Aging; Longevity regulating pathway - multiple species}	{At1g74310; KOG1051 Chaperone HSP104 and related ATP-dependent Clp proteases O Posttranslational modification, protein turnover, chaperones ;}	{GO:0008855; exodeoxyribonuclease VII activity; molecular_function GO:0006810; transport; biological_process GO:0009378; four-way junction helicase activity; molecular_function GO:0042729; DASH complex; cellular_component GO:0006355; regulation of transcription, DNA-dependent; biological_process GO:0003723; RNA binding; molecular_function GO:0042803; protein homodimerization activity; molecular_f…	{EF083471.1; Picea sitchensis clone WS02716_L14 unknown mRNA}	{PF07728:AAA domain (dynein-related subfamily) PF01105:emp24/gp25L/p24 family/GOLD PF04504:Protein of unknown function, DUF573 PF07724:AAA domain (Cdc48 subfamily) PF01637:ATPase domain predominantly from Archaea PF00158:Sigma-54 interaction domain PF02367:Threonylcarbamoyl adenosine biosynthesis protein TsaE PF09726:Transmembrane protein PF10662:Ethanolamine utilisation - propanediol utilisation…
transcript_HQ_AA_transcript1076/f2p0/5632	{XP_019054016.1; PREDICTED: LOW QUALITY PROTEIN: TMV resistance protein N-like [Nelumbo nucifera]}	{sp|Q40392|TMVRN_NICGU; TMV resistance protein N OS=Nicotiana glutinosa GN=N PE=1 SV=1}	{egr:104437093; - - - - -}	{NA}	{GO:0005515; protein binding; molecular_function GO:0007165; signal transduction; biological_process GO:0006355; regulation of transcription, DNA-dependent; biological_process GO:0008134; transcription factor binding; molecular_function GO:0005525; GTP binding; molecular_function GO:0043531; ADP binding; molecular_function GO:0007264; small GTPase mediated signal transduction; biological_process …	{NA}	{PF13676:TIR domain PF00004:ATPase family associated with various cellular activities (AAA) PF13855:Leucine rich repeat PF00931:NB-ARC domain PF01582:TIR domain PF08477:Ras of Complex, Roc, domain of DAPkinase PF01637:ATPase domain predominantly from Archaea PF00158:Sigma-54 interaction domain}
transcript_HQ_AA_transcript10760/f2p0/3311	{ERN02039.1; hypothetical protein AMTR_s00045p00120010 [Amborella trichopoda]}	{sp|Q498E7|SMAL1_XENLA; SWI/SNF-related matrix-associated actin-dependent regulator of chromatin subfamily A-like protein 1 OS=Xenopus laevis GN=smarcal1 PE=2 SV=1}	{sind:105158701; K14440 SMARCAL1, HARP SWI/SNF-related matrix-associated actin-dependent regulator of chromatin subfamily A-like protein 1 3.6.4.12 -}	{At1g48310; KOG1000 Chromatin remodeling protein HARP/SMARCAL1, DEAD-box superfamily B Chromatin structure and dynamics ;}	{GO:0016787; hydrolase activity; molecular_function GO:0003677; DNA binding; molecular_function GO:0005524; ATP binding; molecular_function}	{XM_008225273.2; PREDICTED: Prunus mume SWI/SNF-related matrix-associated actin-dependent regulator of chromatin subfamily A-like protein 1 (LOC103323288), transcript variant X1, mRNA}	{PF04851:Type III restriction enzyme, res subunit PF00176:SNF2 family N-terminal domain}
transcript_HQ_AA_transcript10761/f2p0/3289	{ABR18089.1; unknown [Picea sitchensis]}	{sp|Q8H0S9|PSA_ARATH; Puromycin-sensitive aminopeptidase OS=Arabidopsis thaliana GN=MPA1 PE=2 SV=1}	{gra:105789112; K01256 pepN aminopeptidase N 3.4.11.2 ko00480; Metabolism; Metabolism of other amino acids; Glutathione metabolism}	{At1g63770; KOG1046 Puromycin-sensitive aminopeptidase and related aminopeptidases EO Amino acid transport and metabolism ; Posttranslational modification, protein turnover, chaperones ;}	{GO:0008270; zinc ion binding; molecular_function GO:0008237; metallopeptidase activity; molecular_function}	{EF678325.1; Picea sitchensis clone WS02914_K19 unknown mRNA}	{PF01433:Peptidase family M1}
transcript_HQ_AA_transcript10763/f3p0/3290	{XP_008788976.2; PREDICTED: LOW QUALITY PROTEIN: putative pentatricopeptide repeat-containing protein At5g06400, mitochondrial [Phoenix dactylifera]}	{sp|Q9FNG8|PP366_ARATH; Putative pentatricopeptide repeat-containing protein At5g06400, mitochondrial OS=Arabidopsis thaliana GN=At5g06400 PE=3 SV=1}	{pda:103706604; - - - - -}	{At5g06400; KOG4197 FOG: PPR repeat R General function prediction only ;}	{GO:0003677; DNA binding; molecular_function GO:0006355; regulation of transcription, DNA-dependent; biological_process}	{NA}	{PF03444:Winged helix-turn-helix transcription repressor, HrcA DNA-binding}
transcript_HQ_AA_transcript10764/f3p0/3261	{NA}	{NA}	{NA}	{NA}	{NA}	{NA}	{NA}
transcript_HQ_AA_transcript10767/f12p0/3202	{XP_012070636.1; PREDICTED: receptor-like protein kinase THESEUS 1 [Jatropha curcas]}	{sp|Q9LK35|THE1_ARATH; Receptor-like protein kinase THESEUS 1 OS=Arabidopsis thaliana GN=THE1 PE=1 SV=1}	{jcu:105632799; - - - - -}	{At5g54380; KOG1187 Serine/threonine protein kinase T Signal transduction mechanisms ;}	{GO:0005524; ATP binding; molecular_function GO:0006468; protein phosphorylation; biological_process GO:0004672; protein kinase activity; molecular_function}	{XM_019593598.1; PREDICTED: Lupinus angustifolius receptor-like protein kinase THESEUS 1 (LOC109351906), transcript variant X2, mRNA}	{PF07714:Protein tyrosine kinase PF00069:Protein kinase domain}
transcript_HQ_AA_transcript10768/f3p0/3309	{XP_006849894.1; PREDICTED: uncharacterized protein LOC18439673 [Amborella trichopoda]}	{sp|Q84K00|NAC78_ARATH; NAC domain-containing protein 78 OS=Arabidopsis thaliana GN=NAC078 PE=2 SV=2}	{atr:18439673; - - - - -}	{NA}	{GO:0006355; regulation of transcription, DNA-dependent; biological_process GO:0003677; DNA binding; molecular_function}	{BT102856.1; Picea glauca clone GQ0201_L21 mRNA sequence}	{PF02365:No apical meristem (NAM) protein}
transcript_HQ_AA_transcript1077/f4p0/5649	{NA}	{sp|Q2UMR9|IML1_ASPOR; Vacuolar membrane-associated protein iml1 OS=Aspergillus oryzae (strain ATCC 42149 / RIB 40) GN=iml1 PE=3 SV=2}	{gsl:Gasu_20030; K20404 DEPDC5 DEP domain-containing protein 5 - ko04150; Environmental Information Processing; Signal transduction; mTOR signaling pathway}	{YJR138w; KOG3572 Uncharacterized conserved protein, contains DEP domain T Signal transduction mechanisms ;}	{GO:0035556; intracellular signal transduction; biological_process}	{NA}	{PF00610:Domain found in Dishevelled, Egl-10, and Pleckstrin (DEP)}
transcript_HQ_AA_transcript10773/f2p0/3300	{XP_010244630.1; PREDICTED: nodulin homeobox isoform X1 [Nelumbo nucifera]}	{sp|F4JI44|NDX_ARATH; Nodulin homeobox OS=Arabidopsis thaliana GN=NDX PE=2 SV=1}	{atr:18440510; - - - - -}	{NA}	{NA}	{BT102294.1; Picea glauca clone GQ0175_K03 mRNA sequence}	{NA}
transcript_HQ_AA_transcript10780/f2p0/3304	{XP_017620158.1; PREDICTED: protein SCAI isoform X1 [Gossypium arboreum]}	{sp|Q8N9R8|SCAI_HUMAN; Protein SCAI OS=Homo sapiens GN=SCAI PE=1 SV=2}	{rcu:8284262; - - - - -}	{NA}	{GO:0006351; transcription, DNA-dependent; biological_process GO:0003714; transcription corepressor activity; molecular_function}	{XM_010560382.2; PREDICTED: Tarenaya hassleriana protein SCAI-like (LOC104827242), transcript variant X2, mRNA}	{PF12070:Protein of unknown function (DUF3550/UPF0682)}
transcript_HQ_AA_transcript10781/f2p0/3295	{XP_010254418.1; PREDICTED: EIN3-binding F-box protein 1-like [Nelumbo nucifera]}	{sp|Q708Y0|EBF2_ARATH; EIN3-binding F-box protein 2 OS=Arabidopsis thaliana GN=EBF2 PE=1 SV=1}	{nnu:104595392; K14515 EBF1_2 EIN3-binding F-box protein - ko04016; Environmental Information Processing; Signal transduction; MAPK signaling pathway - plant | ko04075; Environmental Information Processing; Signal transduction; Plant hormone signal transduction}	{At5g25350; KOG1947 Leucine rich repeat proteins, some proteins contain F-box R General function prediction only ;}	{GO:0005515; protein binding; molecular_function}	{NA}	{PF00646:F-box domain PF12937:F-box-like PF13516:Leucine Rich repeat}
transcript_HQ_AA_transcript10785/f2p0/3285	{XP_015896836.1; PREDICTED: ubiquitin carboxyl-terminal hydrolase 14 isoform X1 [Ziziphus jujuba]}	{sp|Q8L6Y1|UBP14_ARATH; Ubiquitin carboxyl-terminal hydrolase 14 OS=Arabidopsis thaliana GN=UBP14 PE=1 SV=1}	{mdm:103448596; K11836 USP5_13, UBP14 ubiquitin carboxyl-terminal hydrolase 5/13 3.4.19.12 -}	{Hs4507855; KOG0944 Ubiquitin-specific protease UBP14 O Posttranslational modification, protein turnover, chaperones ;}	{GO:0008270; zinc ion binding; molecular_function GO:0016579; protein deubiquitination; biological_process GO:0036459; NA}	{BT119346.1; Picea glauca clone GQ04104_G23 mRNA sequence}	{PF02148:Zn-finger in ubiquitin-hydrolases and other protein PF00443:Ubiquitin carboxyl-terminal hydrolase}
transcript_HQ_AA_transcript10789/f2p0/3301	{XP_011624654.1; PREDICTED: probable splicing factor 3A subunit 1 [Amborella trichopoda]}	{sp|Q8RXF1|SF3A1_ARATH; Probable splicing factor 3A subunit 1 OS=Arabidopsis thaliana GN=At1g14650 PE=1 SV=2}	{atr:18437611; K12825 SF3A1, SAP114 splicing factor 3A subunit 1 - ko03040; Genetic Information Processing; Transcription; Spliceosome}	{At1g14650; KOG0007 Splicing factor 3a, subunit 1 A RNA processing and modification ;}	{GO:0005515; protein binding; molecular_function GO:0006396; RNA processing; biological_process GO:0003723; RNA binding; molecular_function}	{BT115170.1; Picea glauca clone GQ03610_M16 mRNA sequence}	{PF00240:Ubiquitin family PF01805:Surp module}
transcript_HQ_AA_transcript10794/f3p0/3306	{ABK24915.1; unknown [Picea sitchensis]}	{sp|Q84JG2|SWI3B_ARATH; SWI/SNF complex subunit SWI3B OS=Arabidopsis thaliana GN=SWI3B PE=1 SV=1}	{cic:CICLE_v10031125mg; K11649 SMARCC SWI/SNF related-matrix-associated actin-dependent regulator of chromatin subfamily C - -}	{At2g33610; KOG1279 Chromatin remodeling factor subunit and related transcription factors B Chromatin structure and dynamics ;}	{GO:0003677; DNA binding; molecular_function GO:0006355; regulation of transcription, DNA-dependent; biological_process GO:0005515; protein binding; molecular_function}	{XM_009418067.2; PREDICTED: Musa acuminata subsp. malaccensis cyclic dof factor 3-like (LOC103996984), mRNA}	{PF04433:SWIRM domain PF02701:Dof domain, zinc finger PF00628:PHD-finger}
transcript_HQ_AA_transcript108/f2p0/7540	{XP_010269187.1; PREDICTED: acetyl-CoA carboxylase 1-like [Nelumbo nucifera]}	{sp|Q38970|ACC1_ARATH; Acetyl-CoA carboxylase 1 OS=Arabidopsis thaliana GN=ACC1 PE=1 SV=1}	{gra:105786130; K11262 ACACA acetyl-CoA carboxylase / biotin carboxylase 1 [EC:6.4.1.2 6.3.4.14] 6.4.1.2,6.3.4.14 ko01212; Metabolism; Global and overview maps; Fatty acid metabolism | ko00620; Metabolism; Carbohydrate metabolism; Pyruvate metabolism | ko00640; Metabolism; Carbohydrate metabolism; Propanoate metabolism | ko00061; Metabolism; Lipid metabolism; Fatty acid biosynthesis | ko00254; Me…	{At1g36160; KOG0368 Acetyl-CoA carboxylase I Lipid transport and metabolism ;}	{GO:0003989; acetyl-CoA carboxylase activity; molecular_function GO:0006633; fatty acid biosynthetic process; biological_process GO:0046872; metal ion binding; molecular_function GO:0005524; ATP binding; molecular_function GO:0008716; D-alanine-D-alanine ligase activity; molecular_function}	{XM_002513835.2; PREDICTED: Ricinus communis acetyl-CoA carboxylase 1 (LOC8263032), mRNA}	{PF08326:Acetyl-CoA carboxylase, central region PF02786:Carbamoyl-phosphate synthase L chain, ATP binding domain PF07478:D-ala D-ala ligase C-terminus PF02655:ATP-grasp domain}
transcript_HQ_AA_transcript10803/f3p0/3289	{GAV63348.1; LOW QUALITY PROTEIN: Adap_comp_sub domain-containing protein/F-box-like domain-containing protein/LRR_6 domain-containing protein [Cephalotus follicularis]}	{sp|Q9CZV8|FXL20_MOUSE; F-box/LRR-repeat protein 20 OS=Mus musculus GN=Fbxl20 PE=1 SV=3}	{adu:107464982; K10268 FBXL2_20 F-box and leucine-rich repeat protein 2/20 - -}	{Hs14249620; KOG4341 F-box protein containing LRR R General function prediction only ;}	{GO:0005515; protein binding; molecular_function}	{NA}	{PF00646:F-box domain PF00560:Leucine Rich Repeat PF12937:F-box-like PF13516:Leucine Rich repeat}
transcript_HQ_AA_transcript10804/f3p0/3291	{JAT61795.1; Aspartate--tRNA ligase, cytoplasmic [Anthurium amnicola]}	{sp|O74407|SYDC_SCHPO; Aspartate--tRNA ligase, cytoplasmic OS=Schizosaccharomyces pombe (strain 972 / ATCC 24843) GN=dps1 PE=1 SV=1}	{csl:COCSUDRAFT_53188; K01876 DARS, aspS aspartyl-tRNA synthetase 6.1.1.12 ko00970; Genetic Information Processing; Translation; Aminoacyl-tRNA biosynthesis}	{SPCC1223.07c; KOG0556 Aspartyl-tRNA synthetase J Translation, ribosomal structure and biogenesis ;}	{GO:0005524; ATP binding; molecular_function GO:0000166; nucleotide binding; molecular_function GO:0005737; cytoplasm; cellular_component GO:0043039; tRNA aminoacylation; biological_process GO:0006418; tRNA aminoacylation for protein translation; biological_process GO:0003676; nucleic acid binding; molecular_function GO:0000049; tRNA binding; molecular_function GO:0004812; aminoacyl-tRNA ligase a…	{NA}	{PF01336:OB-fold nucleic acid binding domain PF00152:tRNA synthetases class II (D, K and N) PF01409:tRNA synthetases class II core domain (F)}
transcript_HQ_AA_transcript10806/f2p0/3310	{JAT54579.1; G1/S-specific cyclin pas1, partial [Anthurium amnicola]}	{sp|O14336|MUG80_SCHPO; Meiotically up-regulated gene 80 protein OS=Schizosaccharomyces pombe (strain 972 / ATCC 24843) GN=mug80 PE=1 SV=1}	{nnu:104612195; - - - - -}	{NA}	{GO:0000079; regulation of cyclin-dependent protein kinase activity; biological_process GO:0019901; protein kinase binding; molecular_function}	{NA}	{PF08613:Cyclin}
transcript_HQ_AA_transcript10807/f3p0/3455	{ONI04487.1; hypothetical protein PRUPE_6G323900 [Prunus persica]}	{sp|Q8S9K3|VAR3_ARATH; Zinc finger protein VAR3, chloroplastic OS=Arabidopsis thaliana GN=VAR3 PE=1 SV=2}	{pper:PRUPE_ppa021050mg; - - - - -}	{At1g55040; KOG4198 RNA-binding Ran Zn-finger protein and related proteins R General function prediction only ;}	{GO:0008270; zinc ion binding; molecular_function}	{BT107275.1; Picea glauca clone GQ03105_D21 mRNA sequence}	{PF00641:Zn-finger in Ran binding protein and others}
transcript_HQ_AA_transcript10810/f2p0/3322	{XP_015882741.1; PREDICTED: zinc finger protein VAR3, chloroplastic isoform X1 [Ziziphus jujuba]}	{sp|Q8S9K3|VAR3_ARATH; Zinc finger protein VAR3, chloroplastic OS=Arabidopsis thaliana GN=VAR3 PE=1 SV=2}	{lang:109357606; - - - - -; lang:109357606; - - - - -}	{At1g55040; KOG4198 RNA-binding Ran Zn-finger protein and related proteins R General function prediction only ;}	{GO:0008270; zinc ion binding; molecular_function GO:0005506; iron ion binding; molecular_function}	{NA}	{PF00301:Rubredoxin PF00641:Zn-finger in Ran binding protein and others}
transcript_HQ_AA_transcript10813/f2p0/3301	{OMO72849.1; hypothetical protein CCACVL1_17557 [Corchorus capsularis]}	{sp|P39866|NIA2_PHAVU; Nitrate reductase [NADH] 2 OS=Phaseolus vulgaris GN=NIA2 PE=3 SV=1}	{gra:105786148; K10534 NR nitrate reductase (NAD(P)H) [EC:1.7.1.1 1.7.1.2 1.7.1.3] 1.7.1.1,1.7.1.2,1.7.1.3 ko00910; Metabolism; Energy metabolism; Nitrogen metabolism}	{At1g77760_1; KOG0535 Sulfite oxidase, molybdopterin-binding component C Energy production and conversion ;}	{GO:0016491; oxidoreductase activity; molecular_function GO:0030151; molybdenum ion binding; molecular_function GO:0055114; oxidation-reduction process; biological_process}	{XM_004953998.1; PREDICTED: Setaria italica nitrate reductase [NAD(P)H] (LOC101754380), mRNA}	{PF00175:Oxidoreductase NAD-binding domain PF03404:Mo-co oxidoreductase dimerisation domain PF08030:Ferric reductase NAD binding domain}
transcript_HQ_AA_transcript10818/f6p0/3281	{XP_011007303.1; PREDICTED: serine/threonine-protein kinase AFC1-like isoform X1 [Populus euphratica]}	{sp|P51567|AFC2_ARATH; Serine/threonine-protein kinase AFC2 OS=Arabidopsis thaliana GN=AFC2 PE=1 SV=1}	{atr:18442733; K08287 E2.7.12.1 dual-specificity kinase 2.7.12.1 -}	{At4g24740; KOG0671 LAMMER dual specificity kinases T Signal transduction mechanisms ;}	{GO:0033644; host cell membrane; cellular_component GO:0005524; ATP binding; molecular_function GO:0019042; latent virus infection; biological_process GO:0006468; protein phosphorylation; biological_process GO:0004672; protein kinase activity; molecular_function}	{BT112776.1; Picea glauca clone GQ03320_M20 mRNA sequence}	{PF07415:Gammaherpesvirus latent membrane protein (LMP2) protein PF07714:Protein tyrosine kinase PF00069:Protein kinase domain}
transcript_HQ_AA_transcript10823/f2p0/3287	{XP_019051464.1; PREDICTED: receptor-like cytosolic serine/threonine-protein kinase RBK2 isoform X1 [Nelumbo nucifera]}	{sp|Q8RXC8|RBK2_ARATH; Receptor-like cytosolic serine/threonine-protein kinase RBK2 OS=Arabidopsis thaliana GN=RBK2 PE=1 SV=1}	{atr:18446901; - - - - -}	{At5g18910; KOG1187 Serine/threonine protein kinase T Signal transduction mechanisms ;}	{GO:0006950; response to stress; biological_process GO:0005524; ATP binding; molecular_function GO:0006468; protein phosphorylation; biological_process GO:0004672; protein kinase activity; molecular_function}	{BT102150.1; Picea glauca clone GQ0167_H24 mRNA sequence}	{PF07714:Protein tyrosine kinase PF00069:Protein kinase domain PF00582:Universal stress protein family}
transcript_HQ_AA_transcript10824/f5p0/3281	{XP_006830091.1; PREDICTED: serine/threonine protein phosphatase 2A 59 kDa regulatory subunit B' gamma isoform [Amborella trichopoda]}	{sp|Q8RW96|2A5G_ARATH; Serine/threonine protein phosphatase 2A 59 kDa regulatory subunit B' gamma isoform OS=Arabidopsis thaliana GN=B'GAMMA PE=1 SV=2}	{nnu:104594080; K11584 PPP2R5 serine/threonine-protein phosphatase 2A regulatory subunit B' - ko03015; Genetic Information Processing; Translation; mRNA surveillance pathway | ko04071; Environmental Information Processing; Signal transduction; Sphingolipid signaling pathway | ko04151; Environmental Information Processing; Signal transduction; PI3K-Akt signaling pathway | ko04152; Environmental In…	{At4g15410_2; KOG2085 Serine/threonine protein phosphatase 2A, regulatory subunit T Signal transduction mechanisms ;}	{GO:0007165; signal transduction; biological_process GO:0019888; protein phosphatase regulator activity; molecular_function GO:0000159; protein phosphatase type 2A complex; cellular_component}	{BT107954.1; Picea glauca clone GQ03115_A09 mRNA sequence}	{PF01603:Protein phosphatase 2A regulatory B subunit (B56 family)}
transcript_HQ_AA_transcript10829/f4p0/3245	{XP_010241184.2; PREDICTED: putative pentatricopeptide repeat-containing protein At3g49142 [Nelumbo nucifera]}	{sp|Q9SN39|PP320_ARATH; Pentatricopeptide repeat-containing protein DOT4, chloroplastic OS=Arabidopsis thaliana GN=DOT4 PE=2 SV=1}	{atr:105421558; - - - - -}	{At4g18750; KOG4197 FOG: PPR repeat R General function prediction only ;}	{GO:0045182; NA GO:0008270; zinc ion binding; molecular_function GO:0006417; regulation of translation; biological_process}	{BT116011.1; Picea glauca clone GQ03710_G11 mRNA sequence}	{PF17049:ATPase expression protein 1 PF14432:DYW family of nucleic acid deaminases}
transcript_HQ_AA_transcript1083/f20p0/5557	{XP_010916892.1; PREDICTED: intron-binding protein aquarius [Elaeis guineensis]}	{sp|Q8CFQ3|AQR_MOUSE; Intron-binding protein aquarius OS=Mus musculus GN=Aqr PE=1 SV=2}	{egu:105041626; K12874 AQR intron-binding protein aquarius - ko03040; Genetic Information Processing; Transcription; Spliceosome}	{At2g38770; KOG1806 DEAD box containing helicases L Replication, recombination and repair ;}	{GO:0019079; viral genome replication; biological_process GO:0005524; ATP binding; molecular_function GO:0016887; ATPase activity; molecular_function GO:0003677; DNA binding; molecular_function GO:0016787; hydrolase activity; molecular_function}	{XM_011468513.1; PREDICTED: Fragaria vesca subsp. vesca intron-binding protein aquarius (LOC101303350), mRNA}	{PF00004:ATPase family associated with various cellular activities (AAA) PF01057:Parvovirus non-structural protein NS1 PF07728:AAA domain (dynein-related subfamily) PF04851:Type III restriction enzyme, res subunit}
transcript_HQ_AA_transcript10830/f2p0/3309	{ABK26987.1; unknown [Picea sitchensis]}	{sp|Q9FLD7|GT14A_ARATH; Beta-glucuronosyltransferase GlcAT14A OS=Arabidopsis thaliana GN=GLCAT14A PE=2 SV=1}	{atr:18436026; K20891 GLCAT14 beta-glucuronosyltransferase 2.4.1.- -}	{At5g39990; KOG0799 Branching enzyme G Carbohydrate transport and metabolism ;}	{GO:0016020; membrane; cellular_component GO:0008375; acetylglucosaminyltransferase activity; molecular_function}	{BT107461.1; Picea glauca clone GQ03107_N03 mRNA sequence}	{PF02485:Core-2/I-Branching enzyme}
transcript_HQ_AA_transcript10837/f2p0/3283	{XP_010251103.1; PREDICTED: L-type lectin-domain containing receptor kinase VIII.2-like [Nelumbo nucifera]}	{sp|Q9LXA5|LRK91_ARATH; L-type lectin-domain containing receptor kinase IX.1 OS=Arabidopsis thaliana GN=LECRK91 PE=1 SV=1}	{nnu:104593109; K04733 IRAK4 interleukin-1 receptor-associated kinase 4 2.7.11.1 ko04064; Environmental Information Processing; Signal transduction; NF-kappa B signaling pathway | ko04620; Organismal Systems; Immune system; Toll-like receptor signaling pathway | ko04624; Organismal Systems; Immune system; Toll and Imd signaling pathway | ko04621; Organismal Systems; Immune system; NOD-like recept…	{NA}	{GO:0005524; ATP binding; molecular_function GO:0030246; carbohydrate binding; molecular_function GO:0006468; protein phosphorylation; biological_process GO:0004672; protein kinase activity; molecular_function}	{XM_017402867.1; PREDICTED: Daucus carota subsp. sativus receptor-like protein kinase THESEUS 1 (LOC108227621), mRNA}	{PF00069:Protein kinase domain PF00139:Legume lectin domain PF07714:Protein tyrosine kinase}
transcript_HQ_AA_transcript10838/f4p0/3251	{XP_008801596.1; PREDICTED: protein TOC75-3, chloroplastic-like [Phoenix dactylifera]}	{sp|Q9STE8|TC753_ARATH; Protein TOC75-3, chloroplastic OS=Arabidopsis thaliana GN=TOC75-3 PE=1 SV=1}	{egu:105044361; - - - - -}	{NA}	{GO:0019867; outer membrane; cellular_component}	{BT119381.1; Picea glauca clone GQ04104_O03 mRNA sequence}	{PF07244:Surface antigen variable number repeat PF01103:Surface antigen}
transcript_HQ_AA_transcript1084/f2p0/5627	{AHM25022.1; CL14-3-3b [Cunninghamia lanceolata]}	{sp|Q9SP07|1433_LILLO; 14-3-3-like protein OS=Lilium longiflorum PE=2 SV=1}	{pda:103695533; K06630 YWHAE 14-3-3 protein epsilon - ko04011; Environmental Information Processing; Signal transduction; MAPK signaling pathway - yeast | ko04390; Environmental Information Processing; Signal transduction; Hippo signaling pathway | ko04391; Environmental Information Processing; Signal transduction; Hippo signaling pathway - fly | ko04151; Environmental Information Processing; Sig…	{At5g38480; KOG0841 Multifunctional chaperone (14-3-3 family) O Posttranslational modification, protein turnover, chaperones ;}	{GO:0016032; NA}	{KC906184.1; Cunninghamia lanceolata CL14-3-3b mRNA, complete cds}	{PF11081:Protein of unknown function (DUF2890)}
transcript_HQ_AA_transcript10842/f6p0/3271	{XP_010246760.1; PREDICTED: regulator of nonsense transcripts UPF3 isoform X1 [Nelumbo nucifera]}	{sp|Q9FVW4|RENT3_ARATH; Regulator of nonsense transcripts UPF3 OS=Arabidopsis thaliana GN=UPF3 PE=1 SV=1}	{atr:18448461; K14328 UPF3, RENT3 regulator of nonsense transcripts 3 - ko03013; Genetic Information Processing; Translation; RNA transport | ko03015; Genetic Information Processing; Translation; mRNA surveillance pathway}	{At1g33980; KOG1295 Nonsense-mediated decay protein Upf3 A RNA processing and modification ;}	{NA}	{BT119848.1; Picea glauca clone GQ04111_B13 mRNA sequence}	{NA}
transcript_HQ_AA_transcript10848/f10p0/3253	{ABR16963.1; unknown [Picea sitchensis]}	{sp|Q9XIF2|MTR4_ARATH; DExH-box ATP-dependent RNA helicase DExH9 OS=Arabidopsis thaliana GN=MTR4 PE=2 SV=1}	{cam:101507765; K12598 MTR4, SKIV2L2 ATP-dependent RNA helicase DOB1 3.6.4.13 ko03018; Genetic Information Processing; Folding, sorting and degradation; RNA degradation}	{At1g59760; KOG0948 Nuclear exosomal RNA helicase MTR4, DEAD-box superfamily A RNA processing and modification ;}	{GO:0003676; nucleic acid binding; molecular_function GO:0005524; ATP binding; molecular_function GO:0003677; DNA binding; molecular_function GO:0016787; hydrolase activity; molecular_function}	{EF677111.1; Picea sitchensis clone WS02762_A02 unknown mRNA}	{PF00270:DEAD/DEAH box helicase PF04851:Type III restriction enzyme, res subunit}
transcript_HQ_AA_transcript10849/f4p0/3288	{ABK25413.1; unknown [Picea sitchensis]}	{sp|Q7Y0F2|NRX12_ORYSJ; Probable nucleoredoxin 1-2 OS=Oryza sativa subsp. japonica GN=Os03g0405900 PE=2 SV=1}	{obr:102717226; K17609 NXN nucleoredoxin 1.8.1.8 -}	{At1g60420; KOG2501 Thioredoxin, nucleoredoxin and related proteins R General function prediction only ;}	{GO:0015035; protein disulfide oxidoreductase activity; molecular_function GO:0008270; zinc ion binding; molecular_function GO:0005622; intracellular; cellular_component GO:0016491; oxidoreductase activity; molecular_function GO:0055114; oxidation-reduction process; biological_process GO:0045454; cell redox homeostasis; biological_process GO:0009055; NA GO:0005515; protein binding; molecular_func…	{BT116692.1; Picea glauca clone GQ03804_L18 mRNA sequence}	{PF08534:Redoxin PF00578:AhpC/TSA family PF00643:B-box zinc finger PF00462:Glutaredoxin PF00085:Thioredoxin PF00628:PHD-finger}
transcript_HQ_AA_transcript1085/f2p0/5611	{XP_010261435.1; PREDICTED: uncharacterized protein LOC104600272 [Nelumbo nucifera]}	{NA}	{pda:103708367; - - - - -}	{NA}	{NA}	{XM_011039023.1; PREDICTED: Populus euphratica uncharacterized LOC105134563 (LOC105134563), mRNA}	{NA}
transcript_HQ_AA_transcript10852/f2p0/3292	{XP_011622632.1; PREDICTED: YTH domain-containing family protein 1 isoform X2 [Amborella trichopoda]}	{sp|P59326|YTHD1_MOUSE; YTH domain-containing family protein 1 OS=Mus musculus GN=Ythdf1 PE=1 SV=1}	{pxb:103964826; - - - - -}	{At3g13460; KOG1901 Uncharacterized high-glucose-regulated protein R General function prediction only ;}	{GO:0003723; RNA binding; molecular_function}	{XR_002163785.1; PREDICTED: Elaeis guineensis YTH domain-containing family protein 2 (LOC105036247), transcript variant X3, misc_RNA}	{PF04146:YT521-B-like domain}
transcript_HQ_AA_transcript10857/f2p0/3322	{ACN39879.1; unknown [Picea sitchensis]}	{sp|P93755|C3H30_ARATH; Zinc finger CCCH domain-containing protein 30 OS=Arabidopsis thaliana GN=At2g41900 PE=1 SV=2}	{vra:106756204; - - - - -}	{At2g41900; KOG1595 CCCH-type Zn-finger protein R General function prediction only ;}	{GO:0005515; protein binding; molecular_function GO:0046872; metal ion binding; molecular_function}	{XM_010059102.2; PREDICTED: Eucalyptus grandis zinc finger CCCH domain-containing protein 30 (LOC104445262), mRNA}	{PF00023:Ankyrin repeat PF13606:Ankyrin repeat PF00642:Zinc finger C-x8-C-x5-C-x3-H type (and similar)}
transcript_HQ_AA_transcript10858/f2p0/3296	{XP_010251103.1; PREDICTED: L-type lectin-domain containing receptor kinase VIII.2-like [Nelumbo nucifera]}	{sp|Q9LXA5|LRK91_ARATH; L-type lectin-domain containing receptor kinase IX.1 OS=Arabidopsis thaliana GN=LECRK91 PE=1 SV=1}	{nnu:104593109; K04733 IRAK4 interleukin-1 receptor-associated kinase 4 2.7.11.1 ko04064; Environmental Information Processing; Signal transduction; NF-kappa B signaling pathway | ko04620; Organismal Systems; Immune system; Toll-like receptor signaling pathway | ko04624; Organismal Systems; Immune system; Toll and Imd signaling pathway | ko04621; Organismal Systems; Immune system; NOD-like recept…	{NA}	{GO:0005524; ATP binding; molecular_function GO:0030246; carbohydrate binding; molecular_function GO:0006468; protein phosphorylation; biological_process GO:0004672; protein kinase activity; molecular_function}	{XM_017402867.1; PREDICTED: Daucus carota subsp. sativus receptor-like protein kinase THESEUS 1 (LOC108227621), mRNA}	{PF00139:Legume lectin domain PF00069:Protein kinase domain PF07714:Protein tyrosine kinase}
transcript_HQ_AA_transcript10861/f2p0/3288	{OAY53674.1; hypothetical protein MANES_03G014900 [Manihot esculenta]}	{sp|Q0WSZ8|WDL6_ARATH; Protein WVD2-like 6 OS=Arabidopsis thaliana GN=WDL6 PE=1 SV=1}	{egu:105042421; - - - - -}	{NA}	{GO:0016021; integral to membrane; cellular_component}	{BT118237.1; Picea glauca clone GQ04003_P04 mRNA sequence}	{PF11770:GRB2-binding adapter (GAPT)}
transcript_HQ_AA_transcript10866/f2p0/3303	{ABR18347.1; unknown [Picea sitchensis]}	{sp|Q9SIV2|PSD2A_ARATH; 26S proteasome non-ATPase regulatory subunit 2 homolog A OS=Arabidopsis thaliana GN=RPN1A PE=1 SV=2}	{atr:18433907; K03028 PSMD2, RPN1 26S proteasome regulatory subunit N1 - ko03050; Genetic Information Processing; Folding, sorting and degradation; Proteasome | ko05169; Human Diseases; Infectious diseases: Viral; Epstein-Barr virus infection}	{At2g20580; KOG2005 26S proteasome regulatory complex, subunit RPN1/PSMD2 O Posttranslational modification, protein turnover, chaperones ;}	{NA}	{EF678603.1; Picea sitchensis clone WS02929_D19 unknown mRNA}	{NA}
transcript_HQ_AA_transcript10868/f2p0/3315	{XP_010278656.1; PREDICTED: uncharacterized protein LOC104612779 [Nelumbo nucifera]}	{sp|Q9ULD4|BRPF3_HUMAN; Bromodomain and PHD finger-containing protein 3 OS=Homo sapiens GN=BRPF3 PE=1 SV=2}	{aip:107646245; K11723 BRD7_9 bromodomain-containing protein 7/9 - -}	{At1g20670; KOG0955 PHD finger protein BR140/LIN-49 R General function prediction only ;}	{GO:0003887; DNA-directed DNA polymerase activity; molecular_function GO:0003677; DNA binding; molecular_function GO:0006351; transcription, DNA-dependent; biological_process GO:0005634; nucleus; cellular_component GO:0005515; protein binding; molecular_function GO:0008270; zinc ion binding; molecular_function}	{BT102093.1; Picea glauca clone GQ0166_C19 mRNA sequence}	{PF06524:NOA36 protein PF04931:DNA polymerase phi PF00439:Bromodomain}
transcript_HQ_AA_transcript10869/f6p0/3264	{AEB39776.1; pentatricopeptide repeat protein 78, partial [Funaria hygrometrica]}	{sp|Q5G1T1|PP272_ARATH; Pentatricopeptide repeat-containing protein At3g49170, chloroplastic OS=Arabidopsis thaliana GN=EMB2261 PE=2 SV=1}	{nnu:104588232; - - - - -}	{At2g27610; KOG4197 FOG: PPR repeat R General function prediction only ;}	{GO:0006417; regulation of translation; biological_process GO:0008270; zinc ion binding; molecular_function GO:0005515; protein binding; molecular_function GO:0045182; NA}	{EF087269.1; Picea sitchensis clone WS02738_G04 unknown mRNA}	{PF14432:DYW family of nucleic acid deaminases PF13176:Tetratricopeptide repeat PF17049:ATPase expression protein 1}
transcript_HQ_AA_transcript10871/f7p0/3275	{BAJ99339.1; predicted protein [Hordeum vulgare subsp. vulgare]}	{sp|P28876|PMA2_SCHPO; Plasma membrane ATPase 2 OS=Schizosaccharomyces pombe (strain 972 / ATCC 24843) GN=pma2 PE=3 SV=1}	{vcn:VOLCADRAFT_103448; K01535 PMA1, PMA2 H+-transporting ATPase 3.6.3.6 ko00190; Metabolism; Energy metabolism; Oxidative phosphorylation}	{YGL008c; KOG0205 Plasma membrane H+-transporting ATPase P Inorganic ion transport and metabolism ;}	{GO:0000166; nucleotide binding; molecular_function GO:0046872; metal ion binding; molecular_function}	{AK110020.1; Oryza sativa Japonica Group cDNA clone:002-159-H09, full insert sequence}	{PF00122:E1-E2 ATPase}
transcript_HQ_AA_transcript10874/f2p0/3303	{XP_006854485.2; PREDICTED: TSL-kinase interacting protein 1 [Amborella trichopoda]}	{sp|Q8LJT8|TKI1_ARATH; TSL-kinase interacting protein 1 OS=Arabidopsis thaliana GN=TKI1 PE=1 SV=2}	{atr:18444250; - - - - -}	{At2g36960; KOG4468 Polycomb-group transcriptional regulator K Transcription ;}	{NA}	{NA}	{NA}
transcript_HQ_AA_transcript10875/f5p0/3284	{NA}	{NA}	{NA}	{NA}	{NA}	{NA}	{NA}
transcript_HQ_AA_transcript10879/f2p0/3163	{NA}	{NA}	{NA}	{NA}	{NA}	{NA}	{NA}
transcript_HQ_AA_transcript10884/f8p0/3256	{XP_006852585.1; PREDICTED: ALG-2 interacting protein X [Amborella trichopoda]}	{sp|Q8T7K0|ALIX_DICDI; ALG-2 interacting protein X OS=Dictyostelium discoideum GN=alxA PE=1 SV=1}	{atr:18442300; K12200 PDCD6IP, ALIX, RIM20 programmed cell death 6-interacting protein - ko04144; Cellular Processes; Transport and catabolism; Endocytosis}	{At1g15130; KOG2220 Predicted signal transduction protein R General function prediction only ;}	{GO:0005515; protein binding; molecular_function}	{XM_002315864.2; Populus trichocarpa hydroxyproline-rich glycoprotein (POPTR_0010s12660g) mRNA, complete cds}	{PF13949:ALIX V-shaped domain binding to HIV }
transcript_HQ_AA_transcript10887/f3p0/3286	{EOY15326.1; Endoribonuclease/protein kinase IRE1-like, putative isoform 1 [Theobroma cacao]}	{sp|Q93VJ2|IRE1B_ARATH; Serine/threonine-protein kinase/endoribonuclease IRE1b OS=Arabidopsis thaliana GN=IRE1B PE=2 SV=1}	{gra:105783398; K08852 ERN1 serine/threonine-protein kinase/endoribonuclease IRE1 [EC:2.7.11.1 3.1.26.-] 2.7.11.1,3.1.26.- ko04141; Genetic Information Processing; Folding, sorting and degradation; Protein processing in endoplasmic reticulum | ko04140; Cellular Processes; Transport and catabolism; Autophagy - animal | ko04210; Cellular Processes; Cell growth and death; Apoptosis | ko05010; Human …	{At5g24360; KOG1027 Serine/threonine protein kinase and endoribonuclease ERN1/IRE1, sensor of the unfolded protein response pathway T Signal transduction mechanisms ;}	{GO:0006397; mRNA processing; biological_process GO:0004540; ribonuclease activity; molecular_function GO:0005524; ATP binding; molecular_function GO:0004672; protein kinase activity; molecular_function GO:0006468; protein phosphorylation; biological_process}	{XM_017374320.1; PREDICTED: Daucus carota subsp. sativus serine/threonine-protein kinase/endoribonuclease IRE1a (LOC108204738), mRNA}	{PF07714:Protein tyrosine kinase PF06479:Ribonuclease 2-5A PF00069:Protein kinase domain}
transcript_HQ_AA_transcript10888/f2p0/3284	{XP_006838934.1; PREDICTED: ADP,ATP carrier protein 2, chloroplastic [Amborella trichopoda]}	{sp|Q39002|TLC1_ARATH; ADP,ATP carrier protein 1, chloroplastic OS=Arabidopsis thaliana GN=AATP1 PE=1 SV=2}	{pda:103721087; K03301 TC.AAA ATP:ADP antiporter, AAA family - -}	{NA}	{GO:0005524; ATP binding; molecular_function GO:0005471; ATP:ADP antiporter activity; molecular_function GO:0016021; integral to membrane; cellular_component GO:0006810; transport; biological_process}	{BT122346.1; Picea sitchensis clone WS0443_P07 unknown mRNA}	{PF11770:GRB2-binding adapter (GAPT) PF03219:TLC ATP/ADP transporter}
transcript_HQ_AA_transcript1089/f2p0/5636	{GAV77316.1; UQ_con domain-containing protein [Cephalotus follicularis]}	{sp|Q9ZVX1|UBC23_ARATH; Probable ubiquitin-conjugating enzyme E2 23 OS=Arabidopsis thaliana GN=UBC23 PE=1 SV=1}	{pda:103718297; K10581 UBE2O ubiquitin-conjugating enzyme E2 O 2.3.2.24 ko04120; Genetic Information Processing; Folding, sorting and degradation; Ubiquitin mediated proteolysis}	{At2g16920; KOG0895 Ubiquitin-conjugating enzyme O Posttranslational modification, protein turnover, chaperones ;}	{GO:0006464; protein modification process; biological_process GO:0015031; protein transport; biological_process}	{BT117523.1; Picea glauca clone GQ03902_E15 mRNA sequence}	{PF05743:UEV domain}
transcript_HQ_AA_transcript10896/f3p0/3233	{ERN09286.1; hypothetical protein AMTR_s00149p00070960 [Amborella trichopoda]}	{sp|Q0WPJ7|RF298_ARATH; Putative E3 ubiquitin-protein ligase RF298 OS=Arabidopsis thaliana GN=RF298 PE=2 SV=1}	{atr:18437434; - - - - -}	{NA}	{GO:0009055; NA GO:0005506; iron ion binding; molecular_function GO:0020037; heme binding; molecular_function}	{BT109604.1; Picea glauca clone GQ03210_I01 mRNA sequence}	{PF01322:Cytochrome C'}
transcript_HQ_AA_transcript1090/f2p0/5618	{OAE25542.1; hypothetical protein AXG93_1543s1590 [Marchantia polymorpha subsp. polymorpha]}	{NA}	{gra:105786732; - - - - -}	{NA}	{GO:0008270; zinc ion binding; molecular_function GO:0003676; nucleic acid binding; molecular_function GO:0070840; dynein complex binding; molecular_function GO:0008134; transcription factor binding; molecular_function GO:0042803; protein homodimerization activity; molecular_function GO:0016032; NA}	{NA}	{PF00098:Zinc knuckle PF16588:C2H2 zinc-finger PF10473:Leucine-rich repeats of kinetochore protein Cenp-F/LEK1 PF00607:gag gene protein p24 (core nucleocapsid protein)}
transcript_HQ_AA_transcript10901/f2p0/3290	{XP_006849650.1; PREDICTED: RNA polymerase-associated protein CTR9 homolog [Amborella trichopoda]}	{sp|B5X0I6|VIP6_ARATH; Protein CTR9 homolog OS=Arabidopsis thaliana GN=VIP6 PE=1 SV=1}	{atr:18439422; K15176 CTR9 RNA polymerase-associated protein CTR9 - -}	{At2g06210; KOG2002 TPR-containing nuclear phosphoprotein that regulates K(+) uptake P Inorganic ion transport and metabolism ;}	{GO:0005515; protein binding; molecular_function GO:0042802; identical protein binding; molecular_function}	{BT112071.1; Picea glauca clone GQ03309_J22 mRNA sequence}	{PF13374:Tetratricopeptide repeat PF13174:Tetratricopeptide repeat PF13414:TPR repeat PF00515:Tetratricopeptide repeat PF07721:Tetratricopeptide repeat PF13371:Tetratricopeptide repeat PF13181:Tetratricopeptide repeat PF13176:Tetratricopeptide repeat}
transcript_HQ_AA_transcript10902/f6p0/3245	{ERN07456.1; hypothetical protein AMTR_s00019p00252640 [Amborella trichopoda]}	{sp|Q54GS1|CL16A_DICDI; Protein CLEC16A homolog OS=Dictyostelium discoideum GN=DDB_G0289943 PE=3 SV=1}	{atr:18435675; K19513 CLEC16A protein CLEC16A - -}	{At3g28430; KOG2219 Uncharacterized conserved protein S Function unknown ;}	{NA}	{NA}	{NA}
transcript_HQ_AA_transcript10904/f3p0/3295	{XP_010261604.1; PREDICTED: ATPase family AAA domain-containing protein 3-B [Nelumbo nucifera]}	{sp|Q6NVR9|ATAD3_XENTR; ATPase family AAA domain-containing protein 3 OS=Xenopus tropicalis GN=atad3 PE=2 SV=1}	{csv:101204659; K17681 ATAD3A_B ATPase family AAA domain-containing protein 3A/B - -}	{At3g03060; KOG0742 AAA+-type ATPase O Posttranslational modification, protein turnover, chaperones ;}	{GO:0003723; RNA binding; molecular_function GO:0006367; transcription initiation from RNA polymerase II promoter; biological_process GO:0005672; transcription factor TFIIA complex; cellular_component GO:0019028; viral capsid; cellular_component GO:0009378; four-way junction helicase activity; molecular_function GO:0016887; ATPase activity; molecular_function GO:0003724; RNA helicase activity; mo…	{BT114714.1; Picea glauca clone GQ03519_M12 mRNA sequence}	{PF07728:AAA domain (dynein-related subfamily) PF03153:Transcription factor IIA, alpha/beta subunit PF03228:Adenoviral core protein VII PF05496:Holliday junction DNA helicase ruvB N-terminus PF00004:ATPase family associated with various cellular activities (AAA) PF00910:RNA helicase}
transcript_HQ_AA_transcript10906/f2p0/3276	{ABR18089.1; unknown [Picea sitchensis]}	{sp|Q8H0S9|PSA_ARATH; Puromycin-sensitive aminopeptidase OS=Arabidopsis thaliana GN=MPA1 PE=2 SV=1}	{gra:105789112; K01256 pepN aminopeptidase N 3.4.11.2 ko00480; Metabolism; Metabolism of other amino acids; Glutathione metabolism}	{At1g63770; KOG1046 Puromycin-sensitive aminopeptidase and related aminopeptidases EO Amino acid transport and metabolism ; Posttranslational modification, protein turnover, chaperones ;}	{GO:0008237; metallopeptidase activity; molecular_function GO:0008270; zinc ion binding; molecular_function}	{EF678325.1; Picea sitchensis clone WS02914_K19 unknown mRNA}	{PF01433:Peptidase family M1}
transcript_HQ_AA_transcript10907/f2p0/3302	{XP_011622370.1; PREDICTED: zinc finger protein 598 [Amborella trichopoda]}	{sp|Q76PD2|HEL2_SCHPO; E3 ubiquitin-protein ligase hel2 OS=Schizosaccharomyces pombe (strain 972 / ATCC 24843) GN=SPCC1223.01 PE=1 SV=2}	{gmx:100799878; - - - - -}	{At3g62240; KOG2231 Predicted E3 ubiquitin ligase O Posttranslational modification, protein turnover, chaperones ;}	{GO:0008270; zinc ion binding; molecular_function}	{BT109935.1; Picea glauca clone GQ03213_O10 mRNA sequence}	{PF00641:Zn-finger in Ran binding protein and others}
transcript_HQ_AA_transcript10908/f2p0/3276	{XP_011041964.1; PREDICTED: uncharacterized protein LOC105137787 [Populus euphratica]}	{sp|Q09818|YAC4_SCHPO; Putative general negative regulator of transcription C16C9.04c OS=Schizosaccharomyces pombe (strain 972 / ATCC 24843) GN=SPAC16C9.04c PE=3 SV=1}	{gra:105789947; K10643 CNOT4, NOT4, MOT2 CCR4-NOT transcription complex subunit 4 2.3.2.27 ko03018; Genetic Information Processing; Folding, sorting and degradation; RNA degradation}	{SPAC16C9.04c; KOG2068 MOT2 transcription factor K Transcription ;}	{GO:0008270; zinc ion binding; molecular_function GO:0046872; metal ion binding; molecular_function GO:0005515; protein binding; molecular_function GO:0003676; nucleic acid binding; molecular_function}	{NA}	{PF00097:Zinc finger, C3HC4 type (RING finger) PF00076:RNA recognition motif. (a.k.a. RRM, RBD, or RNP domain) PF13639:Ring finger domain}
transcript_HQ_AA_transcript10909/f2p0/3280	{XP_018847842.1; PREDICTED: coatomer subunit gamma-2 [Juglans regia]}	{sp|P87140|COPG_SCHPO; Probable coatomer subunit gamma OS=Schizosaccharomyces pombe (strain 972 / ATCC 24843) GN=sec21 PE=1 SV=1}	{gmx:100814149; K17267 COPG coatomer subunit gamma - -}	{SPAC57A7.10c; KOG1078 Vesicle coat complex COPI, gamma subunit U Intracellular trafficking, secretion, and vesicular transport ;}	{GO:0030126; COPI vesicle coat; cellular_component GO:0006886; intracellular protein transport; biological_process GO:0030117; membrane coat; cellular_component GO:0005198; NA GO:0016192; vesicle-mediated transport; biological_process GO:0005515; protein binding; molecular_function}	{XM_006649602.2; PREDICTED: Oryza brachyantha coatomer subunit gamma-1 (LOC102708780), mRNA}	{PF08752:Coatomer gamma subunit appendage platform subdomain PF02985:HEAT repeat PF01602:Adaptin N terminal region}
transcript_HQ_AA_transcript10911/f3p0/3206	{ABR18034.1; unknown [Picea sitchensis]}	{sp|A4VCM0|NAC45_ARATH; NAC domain-containing protein 45 OS=Arabidopsis thaliana GN=NAC045 PE=2 SV=1}	{cic:CICLE_v10005341mg; - - - - -}	{NA}	{GO:0006355; regulation of transcription, DNA-dependent; biological_process GO:0003677; DNA binding; molecular_function}	{NA}	{PF02365:No apical meristem (NAM) protein}
transcript_HQ_AA_transcript10917/f2p0/3307	{BAJ99339.1; predicted protein [Hordeum vulgare subsp. vulgare]}	{sp|P07038|PMA1_NEUCR; Plasma membrane ATPase OS=Neurospora crassa (strain ATCC 24698 / 74-OR23-1A / CBS 708.71 / DSM 1257 / FGSC 987) GN=pma-1 PE=1 SV=1}	{cme:CYME_CMQ247C; K01535 PMA1, PMA2 H+-transporting ATPase 3.6.3.6 ko00190; Metabolism; Energy metabolism; Oxidative phosphorylation}	{YGL008c; KOG0205 Plasma membrane H+-transporting ATPase P Inorganic ion transport and metabolism ;}	{GO:0000166; nucleotide binding; molecular_function GO:0046872; metal ion binding; molecular_function}	{BT101918.1; Picea glauca clone GQ0133_F23 mRNA sequence}	{PF00122:E1-E2 ATPase}
transcript_HQ_AA_transcript1092/f6p0/5579	{JAT44243.1; Chromodomain-helicase-DNA-binding protein 4 [Anthurium amnicola]}	{sp|F4IXE7|IDM1_ARATH; Increased DNA methylation 1 OS=Arabidopsis thaliana GN=IDM1 PE=1 SV=1}	{nnu:104594923; - - - - -}	{NA}	{GO:0016747; transferase activity, transferring acyl groups other than amino-acyl groups; molecular_function GO:0005515; protein binding; molecular_function GO:0008080; N-acetyltransferase activity; molecular_function}	{NA}	{PF00583:Acetyltransferase (GNAT) family PF08445:FR47-like protein PF13673:Acetyltransferase (GNAT) domain PF00628:PHD-finger}
transcript_HQ_AA_transcript10926/f2p0/3296	{XP_011628892.1; PREDICTED: transmembrane protein 184 homolog DDB_G0279555 [Amborella trichopoda]}	{sp|F4JTN2|LAZ1_ARATH; Protein LAZ1 OS=Arabidopsis thaliana GN=LAZ1 PE=1 SV=1}	{pper:PRUPE_ppa004874mg; - - - - -}	{At4g38360; KOG2641 Predicted seven transmembrane receptor - rhodopsin family T Signal transduction mechanisms ;}	{GO:0016491; oxidoreductase activity; molecular_function GO:0016020; membrane; cellular_component GO:0009055; NA}	{XM_010533214.2; PREDICTED: Tarenaya hassleriana protein LAZ1 (LOC104807796), transcript variant X4, mRNA}	{PF13631:Cytochrome b(N-terminal)/b6/petB}
transcript_HQ_AA_transcript1093/f2p0/5616	{XP_011624791.1; PREDICTED: ATP-dependent helicase BRM [Amborella trichopoda]}	{sp|Q6EVK6|BRM_ARATH; ATP-dependent helicase BRM OS=Arabidopsis thaliana GN=BRM PE=1 SV=1}	{gra:105796972; K11647 SMARCA2_4 SWI/SNF-related matrix-associated actin-dependent regulator of chromatin subfamily A member 2/4 3.6.4.- -}	{At2g46020; KOG0386 Chromatin remodeling complex SWI/SNF, component SWI2 and related ATPases (DNA/RNA helicase superfamily) BK Chromatin structure and dynamics ; Transcription ;}	{GO:0005515; protein binding; molecular_function GO:0016787; hydrolase activity; molecular_function GO:0003677; DNA binding; molecular_function GO:0005524; ATP binding; molecular_function GO:0003676; nucleic acid binding; molecular_function}	{XM_003623951.2; Medicago truncatula ATP-dependent helicase BRM mRNA}	{PF00176:SNF2 family N-terminal domain PF04851:Type III restriction enzyme, res subunit PF00439:Bromodomain PF00270:DEAD/DEAH box helicase}
transcript_HQ_AA_transcript10931/f2p0/3281	{XP_018676784.1; PREDICTED: uncharacterized protein LOC103972973 isoform X3 [Musa acuminata subsp. malaccensis]}	{sp|Q06833|YP091_YEAST; Uncharacterized PH domain-containing protein YPR091C OS=Saccharomyces cerevisiae (strain ATCC 204508 / S288c) GN=YPR091C PE=1 SV=1}	{sbi:SORBI_10g031200; - - - - -}	{YPR091c; KOG2238 Uncharacterized conserved protein TEX2, contains PH domain R General function prediction only ;}	{NA}	{NA}	{NA}
transcript_HQ_AA_transcript10933/f3p0/3293	{ADE76820.1; unknown [Picea sitchensis]}	{sp|P58223|Y4837_ARATH; KH domain-containing protein At4g18375 OS=Arabidopsis thaliana GN=At4g18375 PE=2 SV=1}	{nnu:104598099; K21444 - - - -}	{At5g15270; KOG2190 PolyC-binding proteins alphaCP-1 and related KH domain proteins AR RNA processing and modification ; General function prediction only ;}	{GO:0003723; RNA binding; molecular_function}	{NA}	{PF00013:KH domain PF13184:NusA-like KH domain PF07650:KH domain}
transcript_HQ_AA_transcript10936/f2p0/3273	{BAP69206.1; pentatricopeptide repeat protein [Physcomitrella patens]}	{sp|Q9SVP7|PP307_ARATH; Pentatricopeptide repeat-containing protein At4g13650 OS=Arabidopsis thaliana GN=PCMP-H42 PE=2 SV=2}	{vvi:100241001; - - - - -}	{At4g13650; KOG4197 FOG: PPR repeat R General function prediction only ;}	{GO:0016192; vesicle-mediated transport; biological_process GO:0008270; zinc ion binding; molecular_function GO:0045182; NA GO:0006886; intracellular protein transport; biological_process GO:0006417; regulation of translation; biological_process}	{XM_012219808.1; PREDICTED: Jatropha curcas pentatricopeptide repeat-containing protein At4g19191, mitochondrial (LOC105636523), mRNA}	{PF14432:DYW family of nucleic acid deaminases PF17049:ATPase expression protein 1 PF00637:Region in Clathrin and VPS}
transcript_HQ_AA_transcript10938/f2p0/3273	{XP_010242115.1; PREDICTED: probable sugar phosphate/phosphate translocator At1g06470 [Nelumbo nucifera]}	{sp|Q8H184|PT106_ARATH; Probable sugar phosphate/phosphate translocator At1g06470 OS=Arabidopsis thaliana GN=At1g06470 PE=2 SV=1}	{egu:105040592; K15280 SLC35C2 solute carrier family 35, member C2 - -}	{At1g06470; KOG1443 Predicted integral membrane protein S Function unknown ;}	{GO:0016021; integral to membrane; cellular_component GO:0016020; membrane; cellular_component GO:0055085; transmembrane transport; biological_process}	{BT108509.1; Picea glauca clone GQ03122_N19 mRNA sequence}	{PF00892:EamA-like transporter family PF08449:UAA transporter family}
transcript_HQ_AA_transcript10939/f2p0/3275	{NA}	{NA}	{NA}	{NA}	{NA}	{NA}	{NA}
transcript_HQ_AA_transcript1094/f4p0/5597	{NA}	{NA}	{NA}	{NA}	{NA}	{NA}	{NA}
transcript_HQ_AA_transcript10941/f2p0/3276	{XP_015571800.1; PREDICTED: U-box domain-containing protein 34 isoform X2 [Ricinus communis]}	{sp|Q8S8S7|PUB34_ARATH; U-box domain-containing protein 34 OS=Arabidopsis thaliana GN=PUB34 PE=3 SV=1}	{vvi:100242304; - - - - -}	{NA}	{GO:0016567; protein ubiquitination; biological_process GO:0004842; ubiquitin-protein ligase activity; molecular_function GO:0006950; response to stress; biological_process GO:0005524; ATP binding; molecular_function GO:0004672; protein kinase activity; molecular_function GO:0006468; protein phosphorylation; biological_process}	{NA}	{PF07714:Protein tyrosine kinase PF00582:Universal stress protein family PF00069:Protein kinase domain PF04564:U-box domain}
transcript_HQ_AA_transcript10943/f2p0/3302	{NA}	{NA}	{NA}	{NA}	{NA}	{NA}	{NA}
transcript_HQ_AA_transcript10944/f9p0/3194	{XP_006827756.1; PREDICTED: ABC transporter F family member 3 [Amborella trichopoda]}	{sp|Q8H0V6|AB3F_ARATH; ABC transporter F family member 3 OS=Arabidopsis thaliana GN=ABCF3 PE=1 SV=1}	{pda:103698293; K06158 ABCF3 ATP-binding cassette, subfamily F, member 3 - -}	{At1g64550; KOG0062 ATPase component of ABC transporters with duplicated ATPase domains/Translation elongation factor EF-3b EJ Amino acid transport and metabolism ; Translation, ribosomal structure and biogenesis ;}	{GO:0003723; RNA binding; molecular_function GO:0005524; ATP binding; molecular_function GO:0003724; RNA helicase activity; molecular_function GO:0005525; GTP binding; molecular_function GO:0016887; ATPase activity; molecular_function GO:0098519; NA GO:0006614; SRP-dependent cotranslational protein targeting to membrane; biological_process GO:0003924; GTPase activity; molecular_function}	{BT114213.1; Picea glauca clone GQ03510_F14 mRNA sequence}	{PF03193:Protein of unknown function, DUF258 PF00910:RNA helicase PF00004:ATPase family associated with various cellular activities (AAA) PF01926:50S ribosome-binding GTPase PF00448:SRP54-type protein, GTPase domain PF00005:ABC transporter PF07728:AAA domain (dynein-related subfamily) PF13304:AAA domain, putative AbiEii toxin, Type IV TA system PF03266:NTPase}
transcript_HQ_AA_transcript10946/f2p0/3272	{XP_006845220.2; PREDICTED: U-box domain-containing protein 45 [Amborella trichopoda]}	{sp|O48700|PUB6_ARATH; U-box domain-containing protein 6 OS=Arabidopsis thaliana GN=PUB6 PE=2 SV=2}	{atr:18435105; - - - - -}	{At1g67530; KOG0167 FOG: Armadillo/beta-catenin-like repeats S Function unknown ;}	{GO:0016567; protein ubiquitination; biological_process GO:0004842; ubiquitin-protein ligase activity; molecular_function GO:0005515; protein binding; molecular_function GO:0008270; zinc ion binding; molecular_function}	{BT122652.1; Picea sitchensis clone WS0453_N15 unknown mRNA}	{PF11789:Zinc-finger of the MIZ type in Nse subunit PF00514:Armadillo/beta-catenin-like repeat PF04564:U-box domain}
transcript_HQ_AA_transcript10947/f3p0/3275	{NP_001151557.1; uncharacterized protein LOC100285191 [Zea mays]}	{sp|O74740|CFT2_SCHPO; Cleavage factor two protein 2 OS=Schizosaccharomyces pombe (strain 972 / ATCC 24843) GN=cft2 PE=1 SV=1}	{ccp:CHC_T00010199001; K14402 CPSF2, CFT2 cleavage and polyadenylation specificity factor subunit 2 - ko03015; Genetic Information Processing; Translation; mRNA surveillance pathway}	{SPBC1709.15c; KOG1135 mRNA cleavage and polyadenylation factor II complex, subunit CFT2 (CPSF subunit) A RNA processing and modification ;}	{NA}	{NA}	{NA}
transcript_HQ_AA_transcript10949/f2p0/3305	{XP_002962710.1; hypothetical protein SELMODRAFT_79275 [Selaginella moellendorffii]}	{sp|Q9FUY2|LEUNG_ARATH; Transcriptional corepressor LEUNIG OS=Arabidopsis thaliana GN=LUG PE=1 SV=2}	{nnu:104595274; - - - - -}	{At4g32551; KOG0266 WD40 repeat-containing protein R General function prediction only ;}	{GO:0016192; vesicle-mediated transport; biological_process GO:0006886; intracellular protein transport; biological_process GO:0033588; Elongator holoenzyme complex; cellular_component GO:0002098; tRNA wobble uridine modification; biological_process GO:0005515; protein binding; molecular_function GO:0006355; regulation of transcription, DNA-dependent; biological_process GO:0030117; membrane coat;…	{BT111626.1; Picea glauca clone GQ03301_H17 mRNA sequence}	{PF04053:Coatomer WD associated region PF00400:WD domain, G-beta repeat PF04762:IKI3 family}
transcript_HQ_AA_transcript10953/f2p0/3280	{AEU04516.1; lipoxygenase 1 [Taxus wallichiana var. chinensis]}	{sp|Q43191|LOX15_SOLTU; Probable linoleate 9S-lipoxygenase 5 OS=Solanum tuberosum GN=LOX1.5 PE=2 SV=1}	{nnu:104611974; K15718 LOX1_5 linoleate 9S-lipoxygenase 1.13.11.58 ko00591; Metabolism; Lipid metabolism; Linoleic acid metabolism}	{NA}	{GO:0016857; racemase and epimerase activity, acting on carbohydrates and derivatives; molecular_function GO:0005515; protein binding; molecular_function GO:0016702; oxidoreductase activity, acting on single donors with incorporation of molecular oxygen, incorporation of two atoms of oxygen; molecular_function GO:0046872; metal ion binding; molecular_function GO:0055114; oxidation-reduction proce…	{JQ011781.1; Taxus wallichiana var. chinensis lipoxygenase 1 (LOX1) mRNA, complete cds}	{PF05336:Domain of unknown function (DUF718) PF00305:Lipoxygenase PF01477:PLAT/LH2 domain}
transcript_HQ_AA_transcript10955/f4p0/3272	{KNA17025.1; hypothetical protein SOVF_083760 [Spinacia oleracea]}	{sp|Q9P7X5|PPK32_SCHPO; Protein kinase domain-containing protein ppk32 OS=Schizosaccharomyces pombe (strain 972 / ATCC 24843) GN=ppk32 PE=1 SV=1}	{pper:PRUPE_ppa001052mg; K17541 SCYL2 SCY1-like protein 2 - -}	{SPBP23A10.10; KOG2137 Protein kinase T Signal transduction mechanisms ;}	{GO:0006468; protein phosphorylation; biological_process GO:0004672; protein kinase activity; molecular_function GO:0005524; ATP binding; molecular_function}	{NA}	{PF07714:Protein tyrosine kinase PF00069:Protein kinase domain}
transcript_HQ_AA_transcript10956/f2p0/3290	{XP_015897595.1; PREDICTED: probable leucine-rich repeat receptor-like protein kinase At5g49770 [Ziziphus jujuba]}	{sp|Q9LT96|Y5977_ARATH; Probable leucine-rich repeat receptor-like protein kinase At5g49770 OS=Arabidopsis thaliana GN=At5g49770 PE=2 SV=1}	{var:108323854; - - - - -}	{NA}	{GO:0005515; protein binding; molecular_function GO:0006468; protein phosphorylation; biological_process GO:0004672; protein kinase activity; molecular_function GO:0005524; ATP binding; molecular_function}	{XM_013870440.1; PREDICTED: Brassica napus probable leucine-rich repeat receptor-like protein kinase At5g49770 (LOC106429695), transcript variant X2, mRNA}	{PF00560:Leucine Rich Repeat PF13855:Leucine rich repeat PF07714:Protein tyrosine kinase PF13516:Leucine Rich repeat PF00069:Protein kinase domain}
transcript_HQ_AA_transcript10957/f3p0/3300	{XP_006855976.1; PREDICTED: DNA repair protein RAD16 [Amborella trichopoda]}	{sp|P79051|RHP16_SCHPO; ATP-dependent helicase rhp16 OS=Schizosaccharomyces pombe (strain 972 / ATCC 24843) GN=rhp16 PE=3 SV=2}	{atr:18445784; K15083 RAD16 DNA repair protein RAD16 - -}	{At1g05120; KOG1002 Nucleotide excision repair protein RAD16 L Replication, recombination and repair ;}	{GO:0016787; hydrolase activity; molecular_function GO:0005524; ATP binding; molecular_function GO:0003677; DNA binding; molecular_function GO:0005524; ATP binding; molecular_function GO:0046872; metal ion binding; molecular_function GO:0005515; protein binding; molecular_function GO:0008270; zinc ion binding; molecular_function}	{BT101184.1; Picea glauca clone GQ0071_K23 mRNA sequence}	{PF04851:Type III restriction enzyme, res subunit PF00176:SNF2 family N-terminal domain PF00097:Zinc finger, C3HC4 type (RING finger) PF00176:SNF2 family N-terminal domain PF12678:RING-H2 zinc finger domain PF11789:Zinc-finger of the MIZ type in Nse subunit PF14634:zinc-RING finger domain PF13639:Ring finger domain}
transcript_HQ_AA_transcript10958/f2p0/3283	{OMO62957.1; hypothetical protein COLO4_32799 [Corchorus olitorius]}	{sp|P39866|NIA2_PHAVU; Nitrate reductase [NADH] 2 OS=Phaseolus vulgaris GN=NIA2 PE=3 SV=1}	{gra:105786148; K10534 NR nitrate reductase (NAD(P)H) [EC:1.7.1.1 1.7.1.2 1.7.1.3] 1.7.1.1,1.7.1.2,1.7.1.3 ko00910; Metabolism; Energy metabolism; Nitrogen metabolism}	{At1g77760_1; KOG0535 Sulfite oxidase, molybdopterin-binding component C Energy production and conversion ;}	{GO:0055114; oxidation-reduction process; biological_process GO:0030151; molybdenum ion binding; molecular_function GO:0016491; oxidoreductase activity; molecular_function}	{XM_004953998.1; PREDICTED: Setaria italica nitrate reductase [NAD(P)H] (LOC101754380), mRNA}	{PF03404:Mo-co oxidoreductase dimerisation domain PF08030:Ferric reductase NAD binding domain PF00175:Oxidoreductase NAD-binding domain }
transcript_HQ_AA_transcript1096/f4p0/5624	{XP_019264193.1; PREDICTED: probable sucrose-phosphate synthase 2 [Nicotiana attenuata]}	{sp|O04933|SPSA2_CRAPL; Probable sucrose-phosphate synthase 2 OS=Craterostigma plantagineum GN=SPS2 PE=2 SV=1}	{atr:18447493; K00696 E2.4.1.14 sucrose-phosphate synthase 2.4.1.14 ko00500; Metabolism; Carbohydrate metabolism; Starch and sucrose metabolism}	{At1g04920; KOG0853 Glycosyltransferase M Cell wall/membrane/envelope biogenesis ;}	{GO:0005985; sucrose metabolic process; biological_process GO:0016157; sucrose synthase activity; molecular_function}	{KM191308.1; Lycium barbarum cultivar Wolfberry Ningqi No.1 sucrose-phosphate synthase mRNA, complete cds}	{PF00862:Sucrose synthase}
transcript_HQ_AA_transcript10962/f9p0/3263	{OAE23201.1; hypothetical protein AXG93_1630s1160 [Marchantia polymorpha subsp. polymorpha]}	{sp|Q96IK5|GMCL1_HUMAN; Germ cell-less protein-like 1 OS=Homo sapiens GN=GMCL1 PE=1 SV=1}	{eus:EUTSA_v10024402mg; - - - - -}	{Hs22041701; KOG4682 Uncharacterized conserved protein, contains BTB/POZ domain R General function prediction only ;}	{GO:0006351; transcription, DNA-dependent; biological_process GO:0032040; small-subunit processome; cellular_component GO:0003887; DNA-directed DNA polymerase activity; molecular_function GO:0009236; cobalamin biosynthetic process; biological_process GO:0006270; DNA-dependent DNA replication initiation; biological_process GO:0003677; DNA binding; molecular_function GO:0005515; protein binding; mo…	{BT113287.1; Picea glauca clone GQ03403_M05 mRNA sequence}	{PF04147:Nop14-like family PF02724:CDC45-like protein PF06213:Cobalamin biosynthesis protein CobT PF00651:BTB/POZ domain PF04931:DNA polymerase phi}
transcript_HQ_AA_transcript10968/f2p0/3285	{ABR16721.1; unknown [Picea sitchensis]}	{sp|Q9ASS4|Y5838_ARATH; Probably inactive leucine-rich repeat receptor-like protein kinase At5g48380 OS=Arabidopsis thaliana GN=At5g48380 PE=1 SV=1}	{pda:103706061; - - - - -}	{NA}	{GO:0004672; protein kinase activity; molecular_function GO:0005515; protein binding; molecular_function GO:0006468; protein phosphorylation; biological_process GO:0005524; ATP binding; molecular_function}	{BT111701.1; Picea glauca clone GQ03302_G01 mRNA sequence}	{PF13516:Leucine Rich repeat PF00069:Protein kinase domain PF00560:Leucine Rich Repeat PF13855:Leucine rich repeat PF07714:Protein tyrosine kinase}
transcript_HQ_AA_transcript10969/f5p0/3263	{XP_006850154.1; PREDICTED: coatomer subunit beta-1 [Amborella trichopoda]}	{sp|Q9UUF7|COPB_SCHPO; Coatomer subunit beta OS=Schizosaccharomyces pombe (strain 972 / ATCC 24843) GN=sec26 PE=3 SV=1}	{atr:18439936; K17301 COPB1, SEC26 coatomer subunit beta - -}	{SPBC146.14c; KOG1058 Vesicle coat complex COPI, beta subunit U Intracellular trafficking, secretion, and vesicular transport ;}	{GO:0006886; intracellular protein transport; biological_process GO:0030126; COPI vesicle coat; cellular_component GO:0005198; NA GO:0030117; membrane coat; cellular_component GO:0016192; vesicle-mediated transport; biological_process GO:0005515; protein binding; molecular_function}	{NA}	{PF00514:Armadillo/beta-catenin-like repeat PF07718:Coatomer beta C-terminal region PF02985:HEAT repeat PF01602:Adaptin N terminal region}
transcript_HQ_AA_transcript10973/f2p0/3274	{XP_001762391.1; predicted protein [Physcomitrella patens]}	{sp|Q3YBR2|TBRG1_HUMAN; Transforming growth factor beta regulator 1 OS=Homo sapiens GN=TBRG1 PE=1 SV=1}	{ppp:PHYPADRAFT_163293; - - - - -}	{Hs14249500; KOG4443 Putative transcription factor HALR/MLL3, involved in embryonic development R General function prediction only ;}	{GO:0005634; nucleus; cellular_component GO:0006355; regulation of transcription, DNA-dependent; biological_process GO:0006338; chromatin remodeling; biological_process GO:0003676; nucleic acid binding; molecular_function GO:0008270; zinc ion binding; molecular_function GO:0003677; DNA binding; molecular_function GO:0016818; hydrolase activity, acting on acid anhydrides, in phosphorus-containing …	{BT100676.1; Picea glauca clone GQ00410_L16 mRNA sequence}	{PF08074:CHDCT2 (NUC038) domain PF09111:SLIDE PF05964:F/Y-rich N-terminus PF05965:F/Y rich C-terminus}
transcript_HQ_AA_transcript10978/f2p0/3263	{XP_010254149.1; PREDICTED: heat shock 70 kDa protein 15-like [Nelumbo nucifera]}	{sp|F4HQD4|HSP7P_ARATH; Heat shock 70 kDa protein 15 OS=Arabidopsis thaliana GN=HSP70-15 PE=1 SV=1}	{nnu:104595227; K09489 HSPA4 heat shock 70kDa protein 4 - ko04530; Cellular Processes; Cellular community - eukaryotes; Tight junction | ko04612; Organismal Systems; Immune system; Antigen processing and presentation}	{At1g79930; KOG0103 Molecular chaperones HSP105/HSP110/SSE1, HSP70 superfamily O Posttranslational modification, protein turnover, chaperones ;}	{GO:0000902; cell morphogenesis; biological_process}	{BT070679.1; Picea sitchensis clone WS02743_I22 unknown mRNA}	{PF06723:MreB/Mbl protein}
transcript_HQ_AA_transcript10979/f2p0/3155	{ERN02715.1; hypothetical protein AMTR_s00085p00136920 [Amborella trichopoda]}	{sp|Q40392|TMVRN_NICGU; TMV resistance protein N OS=Nicotiana glutinosa GN=N PE=1 SV=1}	{atr:18443711; - - - - -}	{NA}	{GO:0043531; ADP binding; molecular_function GO:0005524; ATP binding; molecular_function GO:0007165; signal transduction; biological_process GO:0005515; protein binding; molecular_function}	{NA}	{PF00004:ATPase family associated with various cellular activities (AAA) PF01637:ATPase domain predominantly from Archaea PF01582:TIR domain PF00931:NB-ARC domain PF13855:Leucine rich repeat PF13676:TIR domain PF00560:Leucine Rich Repeat}
transcript_HQ_AA_transcript10981/f2p0/3274	{XP_009790634.1; PREDICTED: 60S ribosomal protein L32-1-like [Nicotiana sylvestris]}	{sp|P49211|RL321_ARATH; 60S ribosomal protein L32-1 OS=Arabidopsis thaliana GN=RPL32A PE=2 SV=2}	{cann:107859076; - - - - -}	{At4g18100; KOG0878 60S ribosomal protein L32 J Translation, ribosomal structure and biogenesis ;}	{GO:0005622; intracellular; cellular_component GO:0005840; ribosome; cellular_component GO:0003735; structural constituent of ribosome; molecular_function GO:0006412; translation; biological_process}	{BT111655.1; Picea glauca clone GQ03301_N19 mRNA sequence}	{PF01655:Ribosomal protein L32}
transcript_HQ_AA_transcript10983/f2p0/3273	{AEB39778.1; pentatricopeptide repeat protein 77 [Funaria hygrometrica]}	{sp|Q9SVP7|PP307_ARATH; Pentatricopeptide repeat-containing protein At4g13650 OS=Arabidopsis thaliana GN=PCMP-H42 PE=2 SV=2}	{atr:18435335; - - - - -}	{At4g13650; KOG4197 FOG: PPR repeat R General function prediction only ;}	{GO:0005515; protein binding; molecular_function GO:0008270; zinc ion binding; molecular_function}	{XM_015766718.1; PREDICTED: Oryza sativa Japonica Group pentatricopeptide repeat-containing protein At3g46790, chloroplastic (LOC4324854), mRNA}	{PF14432:DYW family of nucleic acid deaminases PF13374:Tetratricopeptide repeat}
transcript_HQ_AA_transcript10984/f4p0/3262	{GAQ82844.1; ubiquitin conjugating enzyme family protein [Klebsormidium flaccidum]}	{sp|Q9NR09|BIRC6_HUMAN; Baculoviral IAP repeat-containing protein 6 OS=Homo sapiens GN=BIRC6 PE=1 SV=2}	{ccp:CHC_T00002999001; K10586 BIRC6, BRUCE baculoviral IAP repeat-containing protein 6 (apollon) 2.3.2.23 ko04120; Genetic Information Processing; Folding, sorting and degradation; Ubiquitin mediated proteolysis | ko04214; Cellular Processes; Cell growth and death; Apoptosis - fly | ko04215; Cellular Processes; Cell growth and death; Apoptosis - multiple species}	{Hs10442822_2; KOG0895 Ubiquitin-conjugating enzyme O Posttranslational modification, protein turnover, chaperones ;}	{GO:0005515; protein binding; molecular_function GO:0015031; protein transport; biological_process GO:0006464; protein modification process; biological_process}	{BT106752.1; Picea glauca clone GQ03009_M24 mRNA sequence}	{PF05773:RWD domain PF05743:UEV domain}
transcript_HQ_AA_transcript10985/f2p0/3268	{XP_011628890.1; PREDICTED: putative pentatricopeptide repeat-containing protein At5g52630 [Amborella trichopoda]}	{sp|Q9SVP7|PP307_ARATH; Pentatricopeptide repeat-containing protein At4g13650 OS=Arabidopsis thaliana GN=PCMP-H42 PE=2 SV=2}	{atr:105421795; - - - - -}	{At4g13650; KOG4197 FOG: PPR repeat R General function prediction only ;}	{GO:0006417; regulation of translation; biological_process GO:0008270; zinc ion binding; molecular_function GO:0045182; NA}	{BT119956.1; Picea glauca clone GQ04113_B16 mRNA sequence}	{PF14432:DYW family of nucleic acid deaminases PF17049:ATPase expression protein 1}
transcript_HQ_AA_transcript1099/f2p0/5603	{OMP06931.1; hypothetical protein COLO4_07793 [Corchorus olitorius]}	{NA}	{nnu:104594331; - - - - -}	{NA}	{GO:0015743; malate transport; biological_process}	{NA}	{PF11744:Aluminium activated malate transporter}
transcript_HQ_AA_transcript10991/f7p0/3244	{ADE76532.1; unknown [Picea sitchensis]}	{sp|Q94AM9|CID4_ARATH; Polyadenylate-binding protein-interacting protein 4 OS=Arabidopsis thaliana GN=CID4 PE=2 SV=1}	{atr:18444930; - - - - -}	{At3g14010; KOG2375 Protein interacting with poly(A)-binding protein A RNA processing and modification ;}	{NA}	{BT114597.1; Picea glauca clone GQ03517_K10 mRNA sequence}	{NA}
transcript_HQ_AA_transcript10992/f2p0/3269	{XP_016698016.1; PREDICTED: probable GTP diphosphokinase RSH2, chloroplastic [Gossypium hirsutum]}	{sp|Q9LVJ3|RSH2C_ARATH; Probable GTP diphosphokinase RSH2, chloroplastic OS=Arabidopsis thaliana GN=RSH2 PE=2 SV=1}	{atr:18439474; - - - - -}	{At3g14050; KOG1157 Predicted guanosine polyphosphate pyrophosphohydrolase/synthase T Signal transduction mechanisms ;}	{NA}	{BT111239.1; Picea glauca clone GQ03234_K21 mRNA sequence}	{NA}
transcript_HQ_AA_transcript10993/f2p0/3267	{XP_010258534.1; PREDICTED: pentatricopeptide repeat-containing protein At3g62470, mitochondrial-like [Nelumbo nucifera]}	{sp|Q9LZP3|PP293_ARATH; Pentatricopeptide repeat-containing protein At3g62470, mitochondrial OS=Arabidopsis thaliana GN=At3g62470 PE=2 SV=1}	{nnu:104598268; - - - - -}	{At3g62470; KOG4197 FOG: PPR repeat R General function prediction only ;}	{GO:0000775; chromosome, centromeric region; cellular_component GO:0003677; DNA binding; molecular_function GO:0003682; chromatin binding; molecular_function GO:0005634; nucleus; cellular_component}	{NA}	{PF09026:Centromere protein B dimerisation domain}
transcript_HQ_AA_transcript10996/f2p0/3304	{OAE35365.1; hypothetical protein AXG93_3493s1010 [Marchantia polymorpha subsp. polymorpha]}	{sp|Q84R21|Y1559_ARATH; DUF21 domain-containing protein At1g55930, chloroplastic OS=Arabidopsis thaliana GN=CBSDUFCH2 PE=2 SV=2}	{jcu:105633063; - - - - -}	{At1g55930_2; KOG2118 Predicted membrane protein, contains two CBS domains S Function unknown ;}	{NA}	{BT113100.1; Picea glauca clone GQ03325_K15 mRNA sequence}	{NA}
transcript_HQ_AA_transcript10998/f2p0/3335	{JAT40596.1; B3 domain-containing protein Os01g0905400 [Anthurium amnicola]}	{sp|Q2R9D2|Y1176_ORYSJ; B3 domain-containing protein Os11g0197600 OS=Oryza sativa subsp. japonica GN=Os11g0197600 PE=2 SV=1}	{nnu:104595836; - - - - -}	{NA}	{GO:0003677; DNA binding; molecular_function}	{NA}	{PF02362:B3 DNA binding domain}
transcript_HQ_AA_transcript10999/f3p0/3304	{CAN60906.1; hypothetical protein VITISV_028450 [Vitis vinifera]}	{sp|F4KFV7|SUV3L_ARATH; DExH-box ATP-dependent RNA helicase DExH18, mitochondrial OS=Arabidopsis thaliana GN=At5g39840 PE=3 SV=1}	{nnu:104598146; K17675 SUPV3L1, SUV3 ATP-dependent RNA helicase SUPV3L1/SUV3 3.6.4.13 -}	{At5g39840; KOG0953 Mitochondrial RNA helicase SUV3, DEAD-box superfamily A RNA processing and modification ;}	{GO:0016817; hydrolase activity, acting on acid anhydrides; molecular_function}	{XM_012229302.1; PREDICTED: Jatropha curcas ATP-dependent RNA helicase SUV3L, mitochondrial (LOC105644058), transcript variant X3, mRNA}	{PF12513:Mitochondrial degradasome RNA helicase subunit C terminal}
transcript_HQ_AA_transcript11/f14p0/8409	{JAT49815.1; RNA replication protein [Anthurium amnicola]}	{sp|Q9DRA1|RDRP_BOTVF; RNA replication protein OS=Botrytis virus F (isolate Botrytis cinerea/New Zealand/Howitt/2001) GN=ORF1 PE=3 SV=1}	{NA}	{NA}	{GO:0003723; RNA binding; molecular_function GO:0006351; transcription, DNA-dependent; biological_process GO:0008174; mRNA methyltransferase activity; molecular_function GO:0005524; ATP binding; molecular_function GO:0080009; mRNA methylation; biological_process GO:0003968; RNA-directed RNA polymerase activity; molecular_function GO:0006396; RNA processing; biological_process}	{NA}	{PF01443:Viral (Superfamily 1) RNA helicase PF01660:Viral methyltransferase PF00978:RNA dependent RNA polymerase}
transcript_HQ_AA_transcript1100/f4p0/5601	{ABR18117.1; unknown [Picea sitchensis]}	{NA}	{nnu:104594346; - - - - -}	{NA}	{NA}	{NA}	{NA}
transcript_HQ_AA_transcript11003/f21p0/3206	{JAT44003.1; putative homeobox protein C32A11.03c, partial [Anthurium amnicola]}	{sp|Q10328|PHX1_SCHPO; Homeobox transcription factor phx1 OS=Schizosaccharomyces pombe (strain 972 / ATCC 24843) GN=phx1 PE=3 SV=1}	{bvg:104890408; - - - - -}	{SPAC32A11.03c; KOG0849 Transcription factor PRD and related proteins, contain PAX and HOX domains K Transcription ;}	{GO:0006355; regulation of transcription, DNA-dependent; biological_process GO:0003677; DNA binding; molecular_function}	{NA}	{PF05920:Homeobox KN domain PF00046:Homeobox domain}
transcript_HQ_AA_transcript11008/f4p0/3271	{NA}	{sp|A1D327|MED16_NEOFI; Mediator of RNA polymerase II transcription subunit 16 OS=Neosartorya fischeri (strain ATCC 1020 / DSM 3700 / CBS 544.65 / FGSC A1164 / JCM 1740 / NRRL 181 / WB 181) GN=sin4 PE=3 SV=1}	{NA}	{NA}	{NA}	{NA}	{NA}
transcript_HQ_AA_transcript11009/f2p0/3289	{ABR17721.1; unknown [Picea sitchensis]}	{sp|Q94CC0|Y5994_ARATH; Uncharacterized protein At5g49945 OS=Arabidopsis thaliana GN=At5g49945 PE=2 SV=1}	{nnu:104596747; - - - - -}	{At4g24330; KOG2357 Uncharacterized conserved protein S Function unknown ;}	{NA}	{NA}	{NA}
transcript_HQ_AA_transcript11012/f2p0/3281	{XP_010917188.1; PREDICTED: uncharacterized protein LOC105041840 isoform X1 [Elaeis guineensis]}	{sp|Q9LPL4|SKP2A_ARATH; F-box protein SKP2A OS=Arabidopsis thaliana GN=SKP2A PE=1 SV=1}	{pda:103704910; K15082 RAD7 DNA repair protein RAD7 - -}	{At2g06030; KOG1947 Leucine rich repeat proteins, some proteins contain F-box R General function prediction only ;}	{GO:0005515; protein binding; molecular_function}	{BT100661.1; Picea glauca clone GQ0036_C17 mRNA sequence}	{PF13516:Leucine Rich repeat}
transcript_HQ_AA_transcript11017/f2p0/3303	{JAT66583.1; Transcription factor steA [Anthurium amnicola]}	{sp|Q5AF56|ADR1_CANAL; Transcriptional regulator ADR1 OS=Candida albicans (strain SC5314 / ATCC MYA-2876) GN=ADR1 PE=2 SV=1}	{bpg:Bathy11g03440; - - - - -; bpg:Bathy11g03440; - - - - -}	{YDR216w; KOG1721 FOG: Zn-finger R General function prediction only ;}	{GO:0008270; zinc ion binding; molecular_function GO:0046872; metal ion binding; molecular_function GO:0005634; nucleus; cellular_component GO:0006351; transcription, DNA-dependent; biological_process GO:0003677; DNA binding; molecular_function}	{NA}	{PF13912:C2H2-type zinc finger PF02892:BED zinc finger PF00096:Zinc finger, C2H2 type PF13465:Zinc-finger double domain PF04082:Fungal specific transcription factor domain }
transcript_HQ_AA_transcript11019/f3p0/3267	{XP_006849889.2; PREDICTED: LOW QUALITY PROTEIN: protein FAM184A [Amborella trichopoda]}	{NA}	{atr:18439668; - - - - -}	{NA}	{GO:0005515; protein binding; molecular_function}	{BT103720.1; Picea glauca clone GQ02801_C08 mRNA sequence}	{PF02151:UvrB/uvrC motif}
transcript_HQ_AA_transcript1102/f2p0/5627	{XP_010266737.1; PREDICTED: phospholipid-transporting ATPase 1 [Nelumbo nucifera]}	{sp|P98204|ALA1_ARATH; Phospholipid-transporting ATPase 1 OS=Arabidopsis thaliana GN=ALA1 PE=2 SV=1}	{nnu:104594464; K14802 DRS2, ATP8A phospholipid-transporting ATPase 3.6.3.1 -}	{At1g59820; KOG0206 P-type ATPase R General function prediction only ;}	{GO:0046872; metal ion binding; molecular_function GO:0000166; nucleotide binding; molecular_function}	{XM_019585329.1; PREDICTED: Lupinus angustifolius phospholipid-transporting ATPase 1-like (LOC109345994), transcript variant X2, mRNA}	{PF00122:E1-E2 ATPase}
transcript_HQ_AA_transcript11023/f2p0/3268	{ABR17863.1; unknown [Picea sitchensis]}	{sp|Q9FKJ0|FK132_ARATH; F-box/kelch-repeat protein At5g60570 OS=Arabidopsis thaliana GN=At5g60570 PE=2 SV=1}	{atr:18444258; - - - - -}	{At5g60570; KOG1072 FOG: Kelch repeat R General function prediction only ;}	{GO:0005515; protein binding; molecular_function}	{BT118283.1; Picea glauca clone GQ04004_K14 mRNA sequence}	{PF00646:F-box domain PF01344:Kelch motif PF07646:Kelch motif}
transcript_HQ_AA_transcript11025/f2p0/3267	{XP_002505528.1; predicted protein [Micromonas commoda]}	{sp|P06774|HAP2_YEAST; Transcriptional activator HAP2 OS=Saccharomyces cerevisiae (strain ATCC 204508 / S288c) GN=HAP2 PE=1 SV=1}	{mis:MICPUN_106430; K08064 NFYA nuclear transcription factor Y, alpha - ko04612; Organismal Systems; Immune system; Antigen processing and presentation | ko05152; Human Diseases; Infectious diseases: Bacterial; Tuberculosis}	{YGL237c; KOG1561 CCAAT-binding factor, subunit B (HAP2) K Transcription ;}	{GO:0030896; checkpoint clamp complex; cellular_component GO:0003700; sequence-specific DNA binding transcription factor activity; molecular_function GO:0006367; transcription initiation from RNA polymerase II promoter; biological_process GO:0006355; regulation of transcription, DNA-dependent; biological_process GO:0000077; DNA damage checkpoint; biological_process GO:0005672; transcription facto…	{NA}	{PF04005:Hus1-like protein PF03153:Transcription factor IIA, alpha/beta subunit PF02045:CCAAT-binding transcription factor (CBF-B/NF-YA) subunit B}
transcript_HQ_AA_transcript11026/f3p0/3288	{XP_002278845.1; PREDICTED: mediator of RNA polymerase II transcription subunit 25 [Vitis vinifera]}	{sp|Q7XYY2|MED25_ARATH; Mediator of RNA polymerase II transcription subunit 25 OS=Arabidopsis thaliana GN=MED25 PE=1 SV=1}	{vvi:100259509; K15168 MED25 mediator of RNA polymerase II transcription subunit 25 - -}	{NA}	{GO:0016485; protein processing; biological_process GO:0009306; protein secretion; biological_process GO:0016020; membrane; cellular_component GO:0004190; aspartic-type endopeptidase activity; molecular_function GO:0016021; integral to membrane; cellular_component GO:0008855; exodeoxyribonuclease VII activity; molecular_function}	{BT108921.1; Picea glauca clone GQ03202_I16 mRNA sequence}	{PF02601:Exonuclease VII, large subunit PF00813:FliP family PF01080:Presenilin}
transcript_HQ_AA_transcript11028/f2p0/3280	{XP_010278656.1; PREDICTED: uncharacterized protein LOC104612779 [Nelumbo nucifera]}	{sp|Q5R8B0|BRD7_PONAB; Bromodomain-containing protein 7 OS=Pongo abelii GN=BRD7 PE=2 SV=1}	{adu:107481777; K11723 BRD7_9 bromodomain-containing protein 7/9 - -}	{At1g20670; KOG0955 PHD finger protein BR140/LIN-49 R General function prediction only ;}	{GO:0005515; protein binding; molecular_function}	{BT102093.1; Picea glauca clone GQ0166_C19 mRNA sequence}	{PF00439:Bromodomain}
transcript_HQ_AA_transcript11029/f2p0/3264	{XP_009376352.1; PREDICTED: uncharacterized protein LOC103965060 isoform X2 [Pyrus x bretschneideri]}	{sp|Q9M2S6|SDIR1_ARATH; E3 ubiquitin-protein ligase SDIR1 OS=Arabidopsis thaliana GN=SDIR1 PE=1 SV=1}	{aip:107625327; - - - - -}	{At1g04790; KOG0800 FOG: Predicted E3 ubiquitin ligase O Posttranslational modification, protein turnover, chaperones ;}	{GO:0008270; zinc ion binding; molecular_function GO:0005680; anaphase-promoting complex; cellular_component GO:0046872; metal ion binding; molecular_function GO:0005515; protein binding; molecular_function GO:0004842; ubiquitin-protein ligase activity; molecular_function}	{BT112332.1; Picea glauca clone GQ03313_I17 mRNA sequence}	{PF14634:zinc-RING finger domain PF12906:RING-variant domain PF00628:PHD-finger PF17123:RING-like zinc finger PF12678:RING-H2 zinc finger domain PF13639:Ring finger domain PF12861:Anaphase-promoting complex subunit 11 RING-H2 finger PF00097:Zinc finger, C3HC4 type (RING finger)}
transcript_HQ_AA_transcript11030/f2p0/3299	{OAE27360.1; hypothetical protein AXG93_441s1210 [Marchantia polymorpha subsp. polymorpha]}	{NA}	{vvi:100244841; - - - - -}	{At3g47160; KOG1039 Predicted E3 ubiquitin ligase O Posttranslational modification, protein turnover, chaperones ;}	{GO:0046872; metal ion binding; molecular_function GO:0005840; ribosome; cellular_component GO:0005515; protein binding; molecular_function GO:0061630; NA GO:0006412; translation; biological_process GO:0003735; structural constituent of ribosome; molecular_function GO:0005680; anaphase-promoting complex; cellular_component GO:0008270; zinc ion binding; molecular_function GO:0004842; ubiquitin-pro…	{BT106728.1; Picea glauca clone GQ03009_F08 mRNA sequence}	{PF00097:Zinc finger, C3HC4 type (RING finger) PF16685:zinc RING finger of MSL2 PF12861:Anaphase-promoting complex subunit 11 RING-H2 finger PF12678:RING-H2 zinc finger domain PF01020:Ribosomal L40e family PF13639:Ring finger domain PF14634:zinc-RING finger domain PF17123:RING-like zinc finger}
transcript_HQ_AA_transcript11032/f3p0/3262	{CBI39502.3; unnamed protein product, partial [Vitis vinifera]}	{sp|Q9FT69|RQSIM_ARATH; ATP-dependent DNA helicase Q-like SIM OS=Arabidopsis thaliana GN=RECQSIM PE=2 SV=1}	{vvi:100257897; K10900 WRN, RECQL2 werner syndrome ATP-dependent helicase 3.6.4.12 -}	{At5g27680; KOG0351 ATP-dependent DNA helicase L Replication, recombination and repair ;}	{GO:0003676; nucleic acid binding; molecular_function GO:0005524; ATP binding; molecular_function}	{XR_001665112.1; PREDICTED: Capsicum annuum ATP-dependent DNA helicase Q-like SIM (LOC107839598), transcript variant X3, misc_RNA}	{PF00270:DEAD/DEAH box helicase}
transcript_HQ_AA_transcript11033/f2p0/3265	{XP_006855574.1; PREDICTED: protein CHROMATIN REMODELING 19 [Amborella trichopoda]}	{sp|Q9ZUL5|CHR19_ARATH; Protein CHROMATIN REMODELING 19 OS=Arabidopsis thaliana GN=ETL1 PE=1 SV=1}	{atr:18445373; K14439 SMARCAD1 SWI/SNF-related matrix-associated actin-dependent regulator of chromatin subfamily A containing DEAD/H box 1 3.6.4.12 ko04550; Cellular Processes; Cellular community - eukaryotes; Signaling pathways regulating pluripotency of stem cells}	{At2g02090; KOG0389 SNF2 family DNA-dependent ATPase B Chromatin structure and dynamics ;}	{GO:0016787; hydrolase activity; molecular_function GO:0005524; ATP binding; molecular_function GO:0003676; nucleic acid binding; molecular_function GO:0003677; DNA binding; molecular_function}	{BT105250.1; Picea glauca clone GQ02820_C17 mRNA sequence}	{PF00270:DEAD/DEAH box helicase PF00176:SNF2 family N-terminal domain PF04851:Type III restriction enzyme, res subunit}
transcript_HQ_AA_transcript11035/f2p0/3277	{ABK25240.1; unknown [Picea sitchensis]}	{sp|O94580|YQ77_SCHPO; Ubiquitin and WLM domain-containing metalloprotease SPCC1442.07c OS=Schizosaccharomyces pombe (strain 972 / ATCC 24843) GN=SPCC1442.07c PE=1 SV=1}	{cit:102631315; - - - - -}	{At5g35690; KOG4842 Protein involved in sister chromatid separation and/or segregation D Cell cycle control, cell division, chromosome partitioning ;}	{GO:0005515; protein binding; molecular_function}	{EF085944.1; Picea sitchensis clone WS02712_C16 unknown mRNA}	{PF00240:Ubiquitin family}
transcript_HQ_AA_transcript11037/f2p0/3266	{ABR18018.1; unknown [Picea sitchensis]}	{sp|Q6P7H4|NIPA_XENLA; NIPA-like protein OS=Xenopus laevis GN=zc3hc1 PE=2 SV=1}	{nnu:104601037; - - - - -}	{At1g48950; KOG4765 Uncharacterized conserved protein S Function unknown ;}	{GO:0005634; nucleus; cellular_component GO:0008270; zinc ion binding; molecular_function}	{BT114200.1; Picea glauca clone GQ03510_B16 mRNA sequence}	{PF07967:C3HC zinc finger-like }
transcript_HQ_AA_transcript1104/f2p0/5609	{ERN15515.1; hypothetical protein AMTR_s00048p00075850 [Amborella trichopoda]}	{sp|Q84T61|HSFA1_ORYSJ; Heat stress transcription factor A-1 OS=Oryza sativa subsp. japonica GN=HSFA1 PE=2 SV=1}	{atr:18443804; K09419 HSFF heat shock transcription factor, other eukaryote - -}	{At5g16820; KOG0627 Heat shock transcription factor K Transcription ;}	{NA}	{XM_016020207.1; PREDICTED: Ziziphus jujuba heat stress transcription factor A-4c-like (LOC107412425), mRNA}	{NA}
transcript_HQ_AA_transcript11041/f8p0/3241	{XP_002264659.1; PREDICTED: digalactosyldiacylglycerol synthase 1, chloroplastic [Vitis vinifera]}	{sp|Q6DW76|DGDG1_SOYBN; Digalactosyldiacylglycerol synthase 1, chloroplastic OS=Glycine max GN=DGD1 PE=2 SV=1}	{nnu:104590241; K09480 E2.4.1.241 digalactosyldiacylglycerol synthase 2.4.1.241 ko00561; Metabolism; Lipid metabolism; Glycerolipid metabolism}	{NA}	{NA}	{AK355868.1; Hordeum vulgare subsp. vulgare mRNA for predicted protein, partial cds, clone: NIASHv1027D22}	{NA}
transcript_HQ_AA_transcript11042/f2p0/3267	{XP_006827968.1; PREDICTED: probable bifunctional riboflavin biosynthesis protein RIBA 1, chloroplastic [Amborella trichopoda]}	{sp|P47924|RIBA1_ARATH; Bifunctional riboflavin biosynthesis protein RIBA 1, chloroplastic OS=Arabidopsis thaliana GN=RIBA1 PE=1 SV=2}	{cit:102626341; K14652 ribBA 3,4-dihydroxy 2-butanone 4-phosphate synthase / GTP cyclohydrolase II [EC:4.1.99.12 3.5.4.25] 4.1.99.12,3.5.4.25 ko00740; Metabolism; Metabolism of cofactors and vitamins; Riboflavin metabolism}	{At5g64300; KOG1284 Bifunctional GTP cyclohydrolase II/3,4-dihydroxy-2butanone-4-phosphate synthase H Coenzyme transport and metabolism ;}	{GO:0009231; riboflavin biosynthetic process; biological_process GO:0008686; 3,4-dihydroxy-2-butanone-4-phosphate synthase activity; molecular_function}	{XM_006492553.2; PREDICTED: Citrus sinensis bifunctional riboflavin biosynthesis protein RIBA 1, chloroplastic-like (LOC102621261), mRNA}	{PF00926:3,4-dihydroxy-2-butanone 4-phosphate synthase}
transcript_HQ_AA_transcript11047/f3p0/3263	{OAO89192.1; hypothetical protein AXX17_ATUG03440, partial [Arabidopsis thaliana]}	{sp|B8NKI4|BGALB_ASPFN; Probable beta-galactosidase B OS=Aspergillus flavus (strain ATCC 200026 / FGSC A1120 / NRRL 3357 / JCM 12722 / SRRC 167) GN=lacB PE=3 SV=2}	{gsl:Gasu_09330; - - - - -}	{Hs10834966; KOG0496 Beta-galactosidase G Carbohydrate transport and metabolism ;}	{GO:0005975; carbohydrate metabolic process; biological_process GO:0004553; hydrolase activity, hydrolyzing O-glycosyl compounds; molecular_function GO:0004565; beta-galactosidase activity; molecular_function GO:0009341; beta-galactosidase complex; cellular_component}	{NA}	{PF00150:Cellulase (glycosyl hydrolase family 5) PF02449:Beta-galactosidase}
transcript_HQ_AA_transcript11048/f2p0/3276	{XP_009350208.1; PREDICTED: flavin carrier protein 1-like [Pyrus x bretschneideri]}	{sp|P39719|FLC2_YEAST; Flavin carrier protein 2 OS=Saccharomyces cerevisiae (strain ATCC 204508 / S288c) GN=FLC2 PE=1 SV=2}	{NA}	{NA}	{NA}	{NA}	{NA}
transcript_HQ_AA_transcript1105/f2p0/5611	{XP_006828457.1; PREDICTED: nuclear pore complex protein NUP155 [Amborella trichopoda]}	{sp|F4HXV6|NU155_ARATH; Nuclear pore complex protein NUP155 OS=Arabidopsis thaliana GN=NUP155 PE=1 SV=1}	{vvi:100243944; K14312 NUP155, NUP170, NUP157 nuclear pore complex protein Nup155 - ko03013; Genetic Information Processing; Translation; RNA transport}	{At1g14850; KOG1900 Nuclear pore complex, Nup155 component (D Nup154, sc Nup157/Nup170) YU Nuclear structure ; Intracellular trafficking, secretion, and vesicular transport ;}	{NA}	{XM_015226794.1; PREDICTED: Solanum pennellii nuclear pore complex protein NUP155 (LOC107025974), mRNA}	{NA}
transcript_HQ_AA_transcript11057/f2p0/3261	{XP_010651077.1; PREDICTED: probable NOT transcription complex subunit VIP2 isoform X3 [Vitis vinifera]}	{sp|Q52JK6|VIP2_NICBE; Probable NOT transcription complex subunit VIP2 (Fragment) OS=Nicotiana benthamiana GN=VIP2 PE=1 SV=1}	{atr:18438370; K12605 CNOT2, NOT2 CCR4-NOT transcription complex subunit 2 - ko03018; Genetic Information Processing; Folding, sorting and degradation; RNA degradation}	{At1g07700; KOG2151 Predicted transcriptional regulator KDR Transcription ; Cell cycle control, cell division, chromosome partitioning ; General function prediction only ;}	{GO:0006355; regulation of transcription, DNA-dependent; biological_process GO:0005634; nucleus; cellular_component}	{XM_011626714.1; PREDICTED: Amborella trichopoda probable NOT transcription complex subunit VIP2 (LOC18438370), mRNA}	{PF04153:NOT2 / NOT3 / NOT5 family}
transcript_HQ_AA_transcript11064/f4p0/3258	{XP_010275207.1; PREDICTED: ubiquitin carboxyl-terminal hydrolase 21 [Nelumbo nucifera]}	{sp|Q9FPS4|UBP23_ARATH; Ubiquitin carboxyl-terminal hydrolase 23 OS=Arabidopsis thaliana GN=UBP23 PE=2 SV=2}	{csv:101210383; K11855 USP36_42 ubiquitin carboxyl-terminal hydrolase 36/42 3.4.19.12 -}	{Hs20540195; KOG1865 Ubiquitin carboxyl-terminal hydrolase O Posttranslational modification, protein turnover, chaperones ;}	{GO:0016579; protein deubiquitination; biological_process GO:0036459; NA}	{NA}	{PF00443:Ubiquitin carboxyl-terminal hydrolase}
transcript_HQ_AA_transcript11065/f3p0/3257	{XP_006847006.1; PREDICTED: ion channel DMI1 [Amborella trichopoda]}	{sp|Q6RHR6|DMI1_MEDTR; Ion channel DMI1 OS=Medicago truncatula GN=DMI1 PE=1 SV=1}	{atr:18436720; - - - - -}	{NA}	{GO:0008324; cation transmembrane transporter activity; molecular_function GO:0006813; potassium ion transport; biological_process}	{XM_002526415.2; PREDICTED: Ricinus communis ion channel DMI1 (LOC8263289), partial mRNA}	{PF02080:TrkA-C domain}
transcript_HQ_AA_transcript11066/f2p0/3271	{XP_006850427.1; PREDICTED: rop guanine nucleotide exchange factor 7 [Amborella trichopoda]}	{sp|Q9LZN0|ROGF7_ARATH; Rop guanine nucleotide exchange factor 7 OS=Arabidopsis thaliana GN=ROPGEF7 PE=1 SV=1}	{atr:18440212; - - - - -}	{NA}	{GO:0005089; Rho guanyl-nucleotide exchange factor activity; molecular_function}	{XM_008371791.2; PREDICTED: Malus x domestica rop guanine nucleotide exchange factor 7-like (LOC103433526), mRNA}	{PF03759:PRONE (Plant-specific Rop nucleotide exchanger)}
transcript_HQ_AA_transcript11067/f2p0/3275	{XP_010279073.1; PREDICTED: transcription factor GTE4 [Nelumbo nucifera]}	{sp|Q9LNC4|GTE4_ARATH; Transcription factor GTE4 OS=Arabidopsis thaliana GN=GTE4 PE=2 SV=1}	{atr:18442201; - - - - -}	{At1g06230; KOG1474 Transcription initiation factor TFIID, subunit BDF1 and related bromodomain proteins K Transcription ;}	{GO:0005515; protein binding; molecular_function}	{XM_018124682.1; PREDICTED: Theobroma cacao transcription factor GTE4 (LOC18594135), transcript variant X3, mRNA}	{PF00439:Bromodomain}
transcript_HQ_AA_transcript11068/f2p0/3274	{ERN11024.1; hypothetical protein AMTR_s00024p00059840 [Amborella trichopoda]}	{sp|Q8RY59|RCD1_ARATH; Inactive poly [ADP-ribose] polymerase RCD1 OS=Arabidopsis thaliana GN=RCD1 PE=1 SV=1}	{atr:18439208; - - - - -}	{NA}	{GO:0003950; NAD+ ADP-ribosyltransferase activity; molecular_function}	{NA}	{PF00644:Poly(ADP-ribose) polymerase catalytic domain}
transcript_HQ_AA_transcript11070/f2p0/3264	{XP_010245056.1; PREDICTED: serine hydroxymethyltransferase 7 [Nelumbo nucifera]}	{sp|Q84WV0|GLYC7_ARATH; Serine hydroxymethyltransferase 7 OS=Arabidopsis thaliana GN=SHM7 PE=2 SV=1}	{atr:18449100; K00600 glyA, SHMT glycine hydroxymethyltransferase 2.1.2.1 ko01200; Metabolism; Global and overview maps; Carbon metabolism | ko01230; Metabolism; Global and overview maps; Biosynthesis of amino acids | ko00630; Metabolism; Carbohydrate metabolism; Glyoxylate and dicarboxylate metabolism | ko00680; Metabolism; Energy metabolism; Methane metabolism | ko00260; Metabolism; Amino acid …	{At1g36370; KOG2467 Glycine/serine hydroxymethyltransferase E Amino acid transport and metabolism ;}	{GO:0006520; cellular amino acid metabolic process; biological_process GO:0016740; transferase activity; molecular_function GO:0016829; lyase activity; molecular_function}	{XM_004515600.2; PREDICTED: Cicer arietinum serine hydroxymethyltransferase 7-like (LOC101514249), mRNA}	{PF01212:Beta-eliminating lyase PF00464:Serine hydroxymethyltransferase}
transcript_HQ_AA_transcript11073/f2p0/3264	{XP_006849701.1; PREDICTED: probable GTP diphosphokinase RSH2, chloroplastic [Amborella trichopoda]}	{sp|Q9LVJ3|RSH2C_ARATH; Probable GTP diphosphokinase RSH2, chloroplastic OS=Arabidopsis thaliana GN=RSH2 PE=2 SV=1}	{atr:18439474; - - - - -}	{At3g14050; KOG1157 Predicted guanosine polyphosphate pyrophosphohydrolase/synthase T Signal transduction mechanisms ;}	{GO:0015969; guanosine tetraphosphate metabolic process; biological_process}	{BT109829.1; Picea glauca clone GQ03212_N08 mRNA sequence}	{PF04607:Region found in RelA / SpoT proteins}
transcript_HQ_AA_transcript11075/f3p0/3263	{XP_015895759.1; PREDICTED: ABC transporter G family member 21 [Ziziphus jujuba]}	{sp|Q9C6W5|AB14G_ARATH; ABC transporter G family member 14 OS=Arabidopsis thaliana GN=ABCG14 PE=2 SV=1}	{pmum:103341408; - - - - -}	{At1g31770; KOG0061 Transporter, ABC superfamily (Breast cancer resistance protein) Q Secondary metabolites biosynthesis, transport and catabolism ;}	{GO:0003924; GTPase activity; molecular_function GO:0005525; GTP binding; molecular_function GO:0016020; membrane; cellular_component GO:0016887; ATPase activity; molecular_function GO:0005524; ATP binding; molecular_function}	{XM_007046291.2; PREDICTED: Theobroma cacao ABC transporter G family member 21 (LOC18610566), mRNA}	{PF03193:Protein of unknown function, DUF258 PF13304:AAA domain, putative AbiEii toxin, Type IV TA system PF00005:ABC transporter PF01061:ABC-2 type transporter PF01695:IstB-like ATP binding protein}
transcript_HQ_AA_transcript11077/f2p0/3264	{ABR17536.1; unknown [Picea sitchensis]}	{sp|Q6EU10|MTA70_ORYSJ; Probable N6-adenosine-methyltransferase MT-A70-like OS=Oryza sativa subsp. japonica GN=Os02g0672600 PE=2 SV=1}	{cmo:103490711; K05925 METTL3_14 mRNA (2'-O-methyladenosine-N6-)-methyltransferase 2.1.1.62 -}	{At4g10760; KOG2098 Predicted N6-adenine RNA methylase A RNA processing and modification ;}	{GO:0006139; nucleobase, nucleoside, nucleotide and nucleic acid metabolic process; biological_process GO:0008168; methyltransferase activity; molecular_function}	{EF677732.1; Picea sitchensis clone WS02773_M12 unknown mRNA}	{PF05063:MT-A70 }
transcript_HQ_AA_transcript11078/f7p0/3228	{XP_006843242.1; PREDICTED: dof zinc finger protein DOF5.3 [Amborella trichopoda]}	{sp|Q9ZV33|DOF22_ARATH; Dof zinc finger protein DOF2.2 OS=Arabidopsis thaliana GN=DOF2.2 PE=2 SV=2}	{atr:18433928; - - - - -}	{NA}	{GO:0006355; regulation of transcription, DNA-dependent; biological_process GO:0003677; DNA binding; molecular_function}	{XM_018586124.1; PREDICTED: Raphanus sativus cyclic dof factor 3 (LOC108813543), mRNA}	{PF02701:Dof domain, zinc finger}
transcript_HQ_AA_transcript11081/f3p0/3243	{ACF85012.1; unknown [Zea mays]}	{sp|P27476|NSR1_YEAST; Nuclear localization sequence-binding protein OS=Saccharomyces cerevisiae (strain ATCC 204508 / S288c) GN=NSR1 PE=1 SV=1}	{egr:104446877; K11294 NCL, NSR1 nucleolin - ko05130; Human Diseases; Infectious diseases: Bacterial; Pathogenic Escherichia coli infection}	{YGR159c; KOG4210 Nuclear localization sequence binding protein K Transcription ;}	{GO:0019028; viral capsid; cellular_component GO:0019031; viral envelope; cellular_component GO:0005198; NA GO:0003676; nucleic acid binding; molecular_function}	{NA}	{PF04513:Baculovirus polyhedron envelope protein, PEP, C terminus PF00076:RNA recognition motif. (a.k.a. RRM, RBD, or RNP domain)}
transcript_HQ_AA_transcript11083/f10p0/3240	{JAT50149.1; Nitrogen assimilation transcription factor nit-4 [Anthurium amnicola]}	{sp|P52959|CTF1B_FUSSO; Cutinase transcription factor 1 beta OS=Fusarium solani subsp. pisi GN=CTF1-BETA PE=2 SV=1}	{NA}	{NA}	{GO:0005634; nucleus; cellular_component GO:0000981; sequence-specific DNA binding RNA polymerase II transcription factor activity; molecular_function GO:0008270; zinc ion binding; molecular_function GO:0003677; DNA binding; molecular_function GO:0006355; regulation of transcription, DNA-dependent; biological_process GO:0006351; transcription, DNA-dependent; biological_process}	{NA}	{PF04082:Fungal specific transcription factor domain PF00172:Fungal Zn(2)-Cys(6) binuclear cluster domain}
transcript_HQ_AA_transcript11084/f3p0/3259	{XP_001762528.1; predicted protein [Physcomitrella patens]}	{NA}	{ppp:PHYPADRAFT_163363; - - - - -}	{NA}	{GO:0005515; protein binding; molecular_function}	{NA}	{PF00041:Fibronectin type III domain}
transcript_HQ_AA_transcript11085/f2p0/3252	{NA}	{sp|O94708|YC58_SCHPO; Uncharacterized protein C1259.08 OS=Schizosaccharomyces pombe (strain 972 / ATCC 24843) GN=SPCC1259.08 PE=1 SV=1}	{NA}	{NA}	{GO:0006367; transcription initiation from RNA polymerase II promoter; biological_process GO:0005672; transcription factor TFIIA complex; cellular_component}	{NA}	{PF03153:Transcription factor IIA, alpha/beta subunit}
transcript_HQ_AA_transcript11087/f3p0/3270	{XP_019190516.1; PREDICTED: probable E3 ubiquitin-protein ligase RHA1A [Ipomoea nil]}	{sp|Q9P7E1|YOF7_SCHPO; Uncharacterized RING finger protein P4H10.07 OS=Schizosaccharomyces pombe (strain 972 / ATCC 24843) GN=SPBP4H10.07 PE=1 SV=1}	{ini:109184972; K16281 RHA1 RING-H2 zinc finger protein RHA1 - -}	{SPBP4H10.07; KOG0800 FOG: Predicted E3 ubiquitin ligase O Posttranslational modification, protein turnover, chaperones ;}	{GO:0046872; metal ion binding; molecular_function GO:0005515; protein binding; molecular_function GO:0005680; anaphase-promoting complex; cellular_component GO:0008270; zinc ion binding; molecular_function GO:0004842; ubiquitin-protein ligase activity; molecular_function}	{NA}	{PF00097:Zinc finger, C3HC4 type (RING finger) PF12861:Anaphase-promoting complex subunit 11 RING-H2 finger PF12678:RING-H2 zinc finger domain PF17121:Zinc finger, C3HC4 type (RING finger) PF11789:Zinc-finger of the MIZ type in Nse subunit PF13639:Ring finger domain PF17122:Zinc-finger PF14634:zinc-RING finger domain PF17123:RING-like zinc finger PF00628:PHD-finger PF12906:RING-variant domain}
transcript_HQ_AA_transcript11089/f3p0/3286	{GAQ79584.1; DNA replication licensing factor MCM4 component [Klebsormidium flaccidum]}	{sp|P30665|MCM4_YEAST; DNA replication licensing factor MCM4 OS=Saccharomyces cerevisiae (strain ATCC 204508 / S288c) GN=MCM4 PE=1 SV=2}	{sly:101264867; K02212 MCM4, CDC54 DNA replication licensing factor MCM4 3.6.4.12 ko03030; Genetic Information Processing; Replication and repair; DNA replication | ko04110; Cellular Processes; Cell growth and death; Cell cycle | ko04111; Cellular Processes; Cell growth and death; Cell cycle - yeast | ko04113; Cellular Processes; Cell growth and death; Meiosis - yeast}	{YPR019w; KOG0478 DNA replication licensing factor, MCM4 component L Replication, recombination and repair ;}	{GO:0005524; ATP binding; molecular_function GO:0006355; regulation of transcription, DNA-dependent; biological_process GO:0003677; DNA binding; molecular_function GO:0016887; ATPase activity; molecular_function GO:0006260; DNA replication; biological_process GO:0008134; transcription factor binding; molecular_function}	{NA}	{PF00158:Sigma-54 interaction domain PF00493:MCM2/3/5 family PF07728:AAA domain (dynein-related subfamily) PF07726:ATPase family associated with various cellular activities (AAA)}
transcript_HQ_AA_transcript1109/f2p0/5609	{XP_010252783.1; PREDICTED: sister chromatid cohesion protein PDS5 homolog B [Nelumbo nucifera]}	{sp|Q5U241|PD5BB_XENLA; Sister chromatid cohesion protein PDS5 homolog B-B OS=Xenopus laevis GN=pds5b-b PE=2 SV=2}	{nnu:104594261; K11267 PDS5 sister chromatid cohesion protein PDS5 - -}	{At5g47690; KOG1525 Sister chromatid cohesion complex Cohesin, subunit PDS5 D Cell cycle control, cell division, chromosome partitioning ;}	{NA}	{BT101082.1; Picea glauca clone GQ0066_P05 mRNA sequence}	{NA}
transcript_HQ_AA_transcript11091/f2p0/3267	{XP_010260590.1; PREDICTED: probable protein S-acyltransferase 19 [Nelumbo nucifera]}	{sp|Q8L5Y5|ZDH17_ARATH; Probable protein S-acyltransferase 19 OS=Arabidopsis thaliana GN=PAT19 PE=2 SV=1}	{nnu:104599666; K20027 ZDHHC1_11 palmitoyltransferase ZDHHC1/11 2.3.1.225 -}	{At4g15080; KOG1311 DHHC-type Zn-finger proteins R General function prediction only ;}	{NA}	{BT102864.1; Picea glauca clone GQ0201_O13 mRNA sequence}	{NA}
transcript_HQ_AA_transcript11098/f2p0/3237	{ABK25240.1; unknown [Picea sitchensis]}	{sp|O94580|YQ77_SCHPO; Ubiquitin and WLM domain-containing metalloprotease SPCC1442.07c OS=Schizosaccharomyces pombe (strain 972 / ATCC 24843) GN=SPCC1442.07c PE=1 SV=1}	{cit:102631315; - - - - -}	{At5g35690; KOG4842 Protein involved in sister chromatid separation and/or segregation D Cell cycle control, cell division, chromosome partitioning ;}	{GO:0005515; protein binding; molecular_function}	{EF085944.1; Picea sitchensis clone WS02712_C16 unknown mRNA}	{PF00240:Ubiquitin family}
transcript_HQ_AA_transcript111/f2p0/7506	{XP_010521508.1; PREDICTED: pre-mRNA-processing-splicing factor 8A [Tarenaya hassleriana]}	{sp|Q99PV0|PRP8_MOUSE; Pre-mRNA-processing-splicing factor 8 OS=Mus musculus GN=Prpf8 PE=1 SV=2}	{cam:101510839; K12856 PRPF8, PRP8 pre-mRNA-processing factor 8 - ko03040; Genetic Information Processing; Transcription; Spliceosome}	{7303518; KOG1795 U5 snRNP spliceosome subunit A RNA processing and modification ;}	{GO:0000398; nuclear mRNA splicing, via spliceosome; biological_process GO:0017070; U6 snRNA binding; molecular_function GO:0030623; U5 snRNA binding; molecular_function GO:0003723; RNA binding; molecular_function}	{XM_003081780.1; Ostreococcus tauri U5 snRNP spliceosome subunit (ISS) (Ot11g00260) mRNA, complete cds}	{PF10596:U6-snRNA interacting domain of PrP8 PF08082:PRO8NT (NUC069), PrP8 N-terminal domain PF10598:RNA recognition motif of the spliceosomal PrP8 PF10597:U5-snRNA binding site 2 of PrP8 PF08083:PROCN (NUC071) domain}
transcript_HQ_AA_transcript1110/f2p0/5626	{NA}	{NA}	{NA}	{NA}	{GO:0016020; membrane; cellular_component GO:0003676; nucleic acid binding; molecular_function GO:0005267; potassium channel activity; molecular_function}	{NA}	{PF01585:G-patch domain PF11956:Ankyrin-G binding motif of KCNQ2-3}
transcript_HQ_AA_transcript11101/f16p0/3228	{XP_012454589.1; PREDICTED: probable GTP diphosphokinase RSH2, chloroplastic [Gossypium raimondii]}	{sp|Q9SYH1|RSH3C_ARATH; Probable GTP diphosphokinase RSH3, chloroplastic OS=Arabidopsis thaliana GN=RSH3 PE=2 SV=1}	{sind:105157806; - - - - -}	{At1g54130; KOG1157 Predicted guanosine polyphosphate pyrophosphohydrolase/synthase T Signal transduction mechanisms ;}	{GO:0015969; guanosine tetraphosphate metabolic process; biological_process}	{BT111239.1; Picea glauca clone GQ03234_K21 mRNA sequence}	{PF04607:Region found in RelA / SpoT proteins}
transcript_HQ_AA_transcript11103/f2p0/3281	{AJC52489.1; SCR [Pinus radiata]}	{sp|Q9AVK4|SCR_PEA; Protein SCARECROW OS=Pisum sativum GN=SCR PE=2 SV=1}	{pper:PRUPE_ppa001546mg; - - - - -}	{NA}	{NA}	{KM264388.1; Pinus radiata SCR (SCR) mRNA, complete cds}	{NA}
transcript_HQ_AA_transcript11110/f4p0/3262	{NP_001117544.1; P-loop containing nucleoside triphosphate hydrolases superfamily protein [Arabidopsis thaliana]}	{sp|Q6AZT2|SPAST_XENLA; Spastin OS=Xenopus laevis GN=spast PE=2 SV=1}	{nnu:104593453; - - - - -}	{At1g64110; KOG0737 AAA+-type ATPase O Posttranslational modification, protein turnover, chaperones ;}	{GO:0003678; DNA helicase activity; molecular_function GO:0009378; four-way junction helicase activity; molecular_function GO:0002949; NA GO:0003723; RNA binding; molecular_function GO:0019079; viral genome replication; biological_process GO:0006310; DNA recombination; biological_process GO:0006281; DNA repair; biological_process GO:0016887; ATPase activity; molecular_function GO:0003724; RNA hel…	{EF676253.1; Picea sitchensis clone WS02724_F16 unknown mRNA}	{PF00910:RNA helicase PF00004:ATPase family associated with various cellular activities (AAA) PF01057:Parvovirus non-structural protein NS1 PF01695:IstB-like ATP binding protein PF02367:Threonylcarbamoyl adenosine biosynthesis protein TsaE PF07724:AAA domain (Cdc48 subfamily) PF06068:TIP49 C-terminus PF05496:Holliday junction DNA helicase ruvB N-terminus PF07728:AAA domain (dynein-related subfami…
transcript_HQ_AA_transcript11111/f2p0/3255	{BAK00241.1; predicted protein [Hordeum vulgare subsp. vulgare]}	{sp|Q7PPA5|ATC1_ANOGA; Calcium-transporting ATPase sarcoplasmic/endoplasmic reticulum type OS=Anopheles gambiae GN=Ca-P60A PE=3 SV=5}	{ccp:CHC_T00008559001; K05853 ATP2A Ca2+ transporting ATPase, sarcoplasmic/endoplasmic reticulum 3.6.3.8 ko04020; Environmental Information Processing; Signal transduction; Calcium signaling pathway | ko04022; Environmental Information Processing; Signal transduction; cGMP-PKG signaling pathway | ko04972; Organismal Systems; Digestive system; Pancreatic secretion | ko05010; Human Diseases; Neurod…	{CE18884; KOG0202 Ca2+ transporting ATPase P Inorganic ion transport and metabolism ;}	{GO:0046872; metal ion binding; molecular_function GO:0000166; nucleotide binding; molecular_function}	{NA}	{PF00122:E1-E2 ATPase}
transcript_HQ_AA_transcript11112/f4p0/3240	{ABR18165.1; unknown [Picea sitchensis]}	{sp|Q6Y2X3|DJC14_HUMAN; DnaJ homolog subfamily C member 14 OS=Homo sapiens GN=DNAJC14 PE=2 SV=2}	{egu:105039980; K09534 DNAJC14 DnaJ homolog subfamily C member 14 - -}	{At5g49580; KOG0720 Molecular chaperone (DnaJ superfamily) O Posttranslational modification, protein turnover, chaperones ;}	{NA}	{XM_007225163.1; Prunus persica hypothetical protein (PRUPE_ppa001922mg) mRNA, complete cds}	{NA}
transcript_HQ_AA_transcript11114/f3p0/3267	{NA}	{NA}	{NA}	{NA}	{GO:0006355; regulation of transcription, DNA-dependent; biological_process GO:0005634; nucleus; cellular_component GO:0000981; sequence-specific DNA binding RNA polymerase II transcription factor activity; molecular_function GO:0008270; zinc ion binding; molecular_function}	{NA}	{PF00172:Fungal Zn(2)-Cys(6) binuclear cluster domain}
transcript_HQ_AA_transcript11115/f2p0/3273	{XP_009420682.1; PREDICTED: cation/calcium exchanger 1-like [Musa acuminata subsp. malaccensis]}	{sp|P87122|YDL6_SCHPO; Putative cation exchanger C3A12.06c OS=Schizosaccharomyces pombe (strain 972 / ATCC 24843) GN=SPAC3A12.06c PE=3 SV=1}	{mus:104000379; K13754 SLC24A6, NCKX6 solute carrier family 24 (sodium/potassium/calcium exchanger), member 6 - -}	{SPAC3A12.06c; KOG2399 K+-dependent Na+:Ca2+ antiporter P Inorganic ion transport and metabolism ;}	{GO:0055085; transmembrane transport; biological_process GO:0016021; integral to membrane; cellular_component}	{NA}	{PF01699:Sodium/calcium exchanger protein}
transcript_HQ_AA_transcript1112/f3p0/5598	{XP_010931793.1; PREDICTED: protein ALWAYS EARLY 2 isoform X1 [Elaeis guineensis]}	{sp|Q6A332|ALY3_ARATH; Protein ALWAYS EARLY 3 OS=Arabidopsis thaliana GN=ALY3 PE=1 SV=1}	{nnu:104586324; - - - - -}	{At3g21430; KOG1019 Retinoblastoma pathway protein LIN-9/chromatin-associated protein Aly BDT Chromatin structure and dynamics ; Cell cycle control, cell division, chromosome partitioning ; Signal transduction mechanisms ;}	{NA}	{EF676459.1; Picea sitchensis clone WS02738_G12 unknown mRNA}	{NA}
transcript_HQ_AA_transcript11121/f2p0/3290	{XP_010273831.1; PREDICTED: subtilisin-like protease SBT1.5 [Nelumbo nucifera]}	{sp|Q9LUM3|SBT15_ARATH; Subtilisin-like protease SBT1.5 OS=Arabidopsis thaliana GN=SBT1.5 PE=2 SV=1}	{sind:105157875; - - - - -}	{NA}	{GO:0006508; proteolysis; biological_process GO:0004252; serine-type endopeptidase activity; molecular_function}	{NA}	{PF00082:Subtilase family}
transcript_HQ_AA_transcript11123/f3p0/3264	{XP_010915873.1; PREDICTED: chaperone protein ClpB1 [Elaeis guineensis]}	{sp|Q6F2Y7|CLPB1_ORYSJ; Chaperone protein ClpB1 OS=Oryza sativa subsp. japonica GN=CLPB1 PE=2 SV=1}	{egu:105040848; K03695 clpB ATP-dependent Clp protease ATP-binding subunit ClpB - ko04213; Organismal Systems; Aging; Longevity regulating pathway - multiple species}	{At1g74310; KOG1051 Chaperone HSP104 and related ATP-dependent Clp proteases O Posttranslational modification, protein turnover, chaperones ;}	{GO:0016021; integral to membrane; cellular_component GO:0006281; DNA repair; biological_process GO:0008608; attachment of spindle microtubules to kinetochore; biological_process GO:0007264; small GTPase mediated signal transduction; biological_process GO:0003724; RNA helicase activity; molecular_function GO:0042729; DASH complex; cellular_component GO:0009378; four-way junction helicase activity…	{BT119088.1; Picea glauca clone GQ04101_F06 mRNA sequence}	{PF07728:AAA domain (dynein-related subfamily) PF07726:ATPase family associated with various cellular activities (AAA) PF04504:Protein of unknown function, DUF573 PF01105:emp24/gp25L/p24 family/GOLD PF00158:Sigma-54 interaction domain PF01637:ATPase domain predominantly from Archaea PF07724:AAA domain (Cdc48 subfamily) PF02367:Threonylcarbamoyl adenosine biosynthesis protein TsaE PF04111:Autophag…
transcript_HQ_AA_transcript11125/f3p0/3269	{XP_006858764.1; PREDICTED: LETM1 and EF-hand domain-containing protein 1, mitochondrial isoform X1 [Amborella trichopoda]}	{sp|Q5ZK33|LETM1_CHICK; LETM1 and EF-hand domain-containing protein 1, mitochondrial OS=Gallus gallus GN=LETM1 PE=2 SV=1}	{atr:18448641; K17800 LETM1, MDM38 LETM1 and EF-hand domain-containing protein 1, mitochondrial - ko04139; Cellular Processes; Transport and catabolism; Mitophagy - yeast}	{At3g59820; KOG1043 Ca2+-binding transmembrane protein LETM1/MRS7 S Function unknown ;}	{GO:0005509; calcium ion binding; molecular_function}	{XM_017372244.1; PREDICTED: Daucus carota subsp. sativus LETM1 and EF-hand domain-containing protein 1, mitochondrial (LOC108192301), mRNA}	{PF13499:EF-hand domain pair PF13833:EF-hand domain pair PF13202:EF hand PF00036:EF hand PF13405:EF-hand domain}
transcript_HQ_AA_transcript11127/f2p0/3252	{ERN07456.1; hypothetical protein AMTR_s00019p00252640 [Amborella trichopoda]}	{sp|Q54GS1|CL16A_DICDI; Protein CLEC16A homolog OS=Dictyostelium discoideum GN=DDB_G0289943 PE=3 SV=1}	{atr:18435675; K19513 CLEC16A protein CLEC16A - -}	{At3g28430; KOG2219 Uncharacterized conserved protein S Function unknown ;}	{NA}	{NA}	{NA}
transcript_HQ_AA_transcript1113/f2p0/5602	{NA}	{NA}	{NA}	{NA}	{NA}	{NA}	{NA}
transcript_HQ_AA_transcript11130/f2p0/3255	{ABR18191.1; unknown [Picea sitchensis]}	{sp|Q8VZH2|APM1_ARATH; Aminopeptidase M1 OS=Arabidopsis thaliana GN=APM1 PE=1 SV=1}	{atr:18435092; K08776 NPEPPS puromycin-sensitive aminopeptidase 3.4.11.- -}	{At4g33090; KOG1046 Puromycin-sensitive aminopeptidase and related aminopeptidases EO Amino acid transport and metabolism ; Posttranslational modification, protein turnover, chaperones ;}	{GO:0008237; metallopeptidase activity; molecular_function GO:0008270; zinc ion binding; molecular_function}	{EF678434.1; Picea sitchensis clone WS02921_A14 unknown mRNA}	{PF01433:Peptidase family M1}
transcript_HQ_AA_transcript11132/f2p0/3243	{JAT50149.1; Nitrogen assimilation transcription factor nit-4 [Anthurium amnicola]}	{sp|P52959|CTF1B_FUSSO; Cutinase transcription factor 1 beta OS=Fusarium solani subsp. pisi GN=CTF1-BETA PE=2 SV=1}	{NA}	{NA}	{GO:0006355; regulation of transcription, DNA-dependent; biological_process GO:0003677; DNA binding; molecular_function GO:0006351; transcription, DNA-dependent; biological_process GO:0000981; sequence-specific DNA binding RNA polymerase II transcription factor activity; molecular_function GO:0005634; nucleus; cellular_component GO:0008270; zinc ion binding; molecular_function}	{NA}	{PF00172:Fungal Zn(2)-Cys(6) binuclear cluster domain PF04082:Fungal specific transcription factor domain }
transcript_HQ_AA_transcript11135/f2p0/3254	{ABK24865.1; unknown [Picea sitchensis]}	{NA}	{pda:103707687; - - - - -}	{NA}	{NA}	{NA}	{NA}
transcript_HQ_AA_transcript11136/f2p0/3249	{XP_006827796.1; PREDICTED: ultraviolet-B receptor UVR8 [Amborella trichopoda]}	{sp|Q9FN03|UVR8_ARATH; Ultraviolet-B receptor UVR8 OS=Arabidopsis thaliana GN=UVR8 PE=1 SV=1}	{mus:103982798; - - - - -}	{At3g15430; KOG1426 FOG: RCC1 domain S Function unknown ;}	{GO:0005515; protein binding; molecular_function}	{XM_010696727.2; PREDICTED: Beta vulgaris subsp. vulgaris ultraviolet-B receptor UVR8 (LOC104907748), mRNA}	{PF12937:F-box-like}
transcript_HQ_AA_transcript11139/f2p0/3310	{ACN40376.1; unknown [Picea sitchensis]}	{NA}	{nnu:104612678; - - - - -}	{NA}	{GO:0005515; protein binding; molecular_function}	{NA}	{PF02845:CUE domain}
transcript_HQ_AA_transcript11145/f2p0/3256	{XP_007205012.1; hypothetical protein PRUPE_ppa003682mg [Prunus persica]}	{sp|Q9LFP7|PIX7_ARATH; Probable serine/threonine-protein kinase PIX7 OS=Arabidopsis thaliana GN=PIX7 PE=1 SV=1}	{pper:PRUPE_ppa003682mg; - - - - -}	{At3g08760; KOG1187 Serine/threonine protein kinase T Signal transduction mechanisms ;}	{GO:0004672; protein kinase activity; molecular_function GO:0006468; protein phosphorylation; biological_process GO:0005524; ATP binding; molecular_function}	{XM_003604740.2; Medicago truncatula receptor-like kinase plant-like protein mRNA}	{PF00069:Protein kinase domain PF07714:Protein tyrosine kinase}
transcript_HQ_AA_transcript11147/f4p0/3263	{AAC49686.1; isocitrate lyase [Pinus taeda]}	{sp|Q43097|ACEA_PINTA; Isocitrate lyase OS=Pinus taeda GN=ICL 8 PE=2 SV=1}	{cit:102615372; K01637 E4.1.3.1, aceA isocitrate lyase 4.1.3.1 ko01200; Metabolism; Global and overview maps; Carbon metabolism | ko00630; Metabolism; Carbohydrate metabolism; Glyoxylate and dicarboxylate metabolism}	{At3g21720; KOG1260 Isocitrate lyase C Energy production and conversion ;}	{GO:0019752; carboxylic acid metabolic process; biological_process GO:0004451; isocitrate lyase activity; molecular_function}	{U39454.1; Pinus taeda isocitrate lyase (ICL 12) mRNA, complete cds}	{PF00463:Isocitrate lyase family}
transcript_HQ_AA_transcript11149/f3p0/3245	{ABR18089.1; unknown [Picea sitchensis]}	{sp|Q8H0S9|PSA_ARATH; Puromycin-sensitive aminopeptidase OS=Arabidopsis thaliana GN=MPA1 PE=2 SV=1}	{gra:105789112; K01256 pepN aminopeptidase N 3.4.11.2 ko00480; Metabolism; Metabolism of other amino acids; Glutathione metabolism}	{At1g63770; KOG1046 Puromycin-sensitive aminopeptidase and related aminopeptidases EO Amino acid transport and metabolism ; Posttranslational modification, protein turnover, chaperones ;}	{GO:0008237; metallopeptidase activity; molecular_function GO:0008270; zinc ion binding; molecular_function}	{EF678325.1; Picea sitchensis clone WS02914_K19 unknown mRNA}	{PF01433:Peptidase family M1}
transcript_HQ_AA_transcript11151/f2p0/3281	{XP_002965312.1; hypothetical protein SELMODRAFT_439163 [Selaginella moellendorffii]}	{sp|P31542|CLPAB_SOLLC; ATP-dependent Clp protease ATP-binding subunit ClpA homolog CD4B, chloroplastic OS=Solanum lycopersicum GN=CD4B PE=3 SV=1}	{pda:103708061; K03696 clpC ATP-dependent Clp protease ATP-binding subunit ClpC - -}	{At5g50920; KOG1051 Chaperone HSP104 and related ATP-dependent Clp proteases O Posttranslational modification, protein turnover, chaperones ;}	{GO:0019538; protein metabolic process; biological_process GO:0016787; hydrolase activity; molecular_function GO:0016301; kinase activity; molecular_function GO:0008134; transcription factor binding; molecular_function GO:0003924; GTPase activity; molecular_function GO:0006310; DNA recombination; biological_process GO:0005524; ATP binding; molecular_function GO:0003677; DNA binding; molecular_fun…	{BT110916.1; Picea glauca clone GQ03229_M14 mRNA sequence}	{PF01695:IstB-like ATP binding protein PF00158:Sigma-54 interaction domain PF07724:AAA domain (Cdc48 subfamily) PF05496:Holliday junction DNA helicase ruvB N-terminus PF07728:AAA domain (dynein-related subfamily) PF07726:ATPase family associated with various cellular activities (AAA) PF04851:Type III restriction enzyme, res subunit PF00005:ABC transporter PF00004:ATPase family associated with var…
transcript_HQ_AA_transcript11157/f3p0/3270	{CDP16532.1; unnamed protein product [Coffea canephora]}	{sp|P31540|HSP98_NEUCR; Heat shock protein hsp98 OS=Neurospora crassa (strain ATCC 24698 / 74-OR23-1A / CBS 708.71 / DSM 1257 / FGSC 987) GN=hsp98 PE=1 SV=2}	{gsl:Gasu_03700; K03695 clpB ATP-dependent Clp protease ATP-binding subunit ClpB - ko04213; Organismal Systems; Aging; Longevity regulating pathway - multiple species}	{SPBC16D10.08c; KOG1051 Chaperone HSP104 and related ATP-dependent Clp proteases O Posttranslational modification, protein turnover, chaperones ;}	{GO:0071988; protein localization to spindle pole body; biological_process GO:0003924; GTPase activity; molecular_function GO:0008134; transcription factor binding; molecular_function GO:0005525; GTP binding; molecular_function GO:0016887; ATPase activity; molecular_function GO:0003677; DNA binding; molecular_function GO:0015078; hydrogen ion transmembrane transporter activity; molecular_function…	{NA}	{PF00437:Type II/IV secretion system protein PF02861:Clp amino terminal domain, pathogenicity island component PF00005:ABC transporter PF01496:V-type ATPase 116kDa subunit family PF00910:RNA helicase PF00004:ATPase family associated with various cellular activities (AAA) PF13851:Growth-arrest specific micro-tubule binding PF07726:ATPase family associated with various cellular activities (AAA) PF0…
transcript_HQ_AA_transcript11158/f3p0/3266	{XP_006829313.1; PREDICTED: probable receptor-like serine/threonine-protein kinase At5g57670 [Amborella trichopoda]}	{sp|Q9LV48|PERK1_ARATH; Proline-rich receptor-like protein kinase PERK1 OS=Arabidopsis thaliana GN=PERK1 PE=2 SV=1}	{cit:102625796; - - - - -}	{NA}	{GO:0004672; protein kinase activity; molecular_function GO:0006468; protein phosphorylation; biological_process GO:0005524; ATP binding; molecular_function GO:0006950; response to stress; biological_process}	{XM_009414928.2; PREDICTED: Musa acuminata subsp. malaccensis PTI1-like tyrosine-protein kinase 2 (LOC103994472), transcript variant X4, mRNA}	{PF00069:Protein kinase domain PF00582:Universal stress protein family PF07714:Protein tyrosine kinase}
transcript_HQ_AA_transcript11160/f2p0/3191	{NA}	{NA}	{NA}	{NA}	{NA}	{NA}	{NA}
transcript_HQ_AA_transcript11167/f2p0/3251	{GAQ90703.1; hypothetical protein KFL_006760020 [Klebsormidium flaccidum]}	{sp|S0DXJ2|FUB8_GIBF5; Non-canonical non-ribosomal peptide synthetase FUB8 OS=Gibberella fujikuroi (strain CBS 195.34 / IMI 58289 / NRRL A-6831) GN=FUB8 PE=1 SV=1}	{bpg:Bathy14g02980; - - - - -}	{SPAP7G5.04c; KOG1178 Non-ribosomal peptide synthetase/alpha-aminoadipate reductase and related enzymes Q Secondary metabolites biosynthesis, transport and catabolism ;}	{GO:0003854; 3-beta-hydroxy-delta5-steroid dehydrogenase activity; molecular_function GO:0008152; NA GO:0050662; coenzyme binding; molecular_function GO:0003824; NA GO:0055114; oxidation-reduction process; biological_process GO:0016616; oxidoreductase activity, acting on the CH-OH group of donors, NAD or NADP as acceptor; molecular_function GO:0006694; steroid biosynthetic process; biological_pro…	{NA}	{PF00501:AMP-binding enzyme PF01073:3-beta hydroxysteroid dehydrogenase/isomerase family PF01370:NAD dependent epimerase/dehydratase family}
transcript_HQ_AA_transcript11172/f6p0/3241	{NA}	{NA}	{NA}	{NA}	{NA}	{NA}	{NA}
transcript_HQ_AA_transcript11174/f2p0/3261	{XP_011465668.1; PREDICTED: LOW QUALITY PROTEIN: probable LRR receptor-like serine/threonine-protein kinase At1g56130 [Fragaria vesca subsp. vesca]}	{sp|Q9CAL3|CRK2_ARATH; Cysteine-rich receptor-like protein kinase 2 OS=Arabidopsis thaliana GN=CRK2 PE=2 SV=1}	{fve:101305314; - - - - -}	{NA}	{NA}	{NA}	{NA}
transcript_HQ_AA_transcript11176/f5p0/3252	{XP_001757584.1; predicted protein [Physcomitrella patens]}	{sp|P26683|SIGA_NOSS1; RNA polymerase sigma factor SigA OS=Nostoc sp. (strain PCC 7120 / SAG 25.82 / UTEX 2576) GN=sigA PE=3 SV=1}	{ppp:PHYPADRAFT_206687; - - - - -}	{NA}	{GO:0003700; sequence-specific DNA binding transcription factor activity; molecular_function GO:0003723; RNA binding; molecular_function GO:0003677; DNA binding; molecular_function GO:0006355; regulation of transcription, DNA-dependent; biological_process GO:0016987; sigma factor activity; molecular_function GO:0042025; host cell nucleus; cellular_component GO:0006352; transcription initiation, D…	{NA}	{PF01517:Hepatitis delta virus delta antigen PF04542:Sigma-70 region 2 PF00140:Sigma-70 factor, region 1.2 PF04539:Sigma-70 region 3}
transcript_HQ_AA_transcript1118/f2p0/5601	{OAE24067.1; hypothetical protein AXG93_2402s1260 [Marchantia polymorpha subsp. polymorpha]}	{sp|Q10161|CLH_SCHPO; Probable clathrin heavy chain OS=Schizosaccharomyces pombe (strain 972 / ATCC 24843) GN=chc1 PE=1 SV=1}	{atr:18433494; K04646 CLTC clathrin heavy chain - ko04144; Cellular Processes; Transport and catabolism; Endocytosis | ko04142; Cellular Processes; Transport and catabolism; Lysosome | ko04961; Organismal Systems; Excretory system; Endocrine and other factor-regulated calcium reabsorption | ko04721; Organismal Systems; Nervous system; Synaptic vesicle cycle | ko05016; Human Diseases; Neurodegener…	{SPAC26A3.05; KOG0985 Vesicle coat protein clathrin, heavy chain U Intracellular trafficking, secretion, and vesicular transport ;}	{GO:0016192; vesicle-mediated transport; biological_process GO:0006364; rRNA processing; biological_process GO:0005515; protein binding; molecular_function GO:0006886; intracellular protein transport; biological_process GO:0032040; small-subunit processome; cellular_component GO:0005198; NA GO:0030117; membrane coat; cellular_component}	{NA}	{PF00515:Tetratricopeptide repeat PF04053:Coatomer WD associated region PF13181:Tetratricopeptide repeat PF08625:Utp13 specific WD40 associated domain PF00637:Region in Clathrin and VPS}
transcript_HQ_AA_transcript11187/f2p0/3262	{NA}	{NA}	{NA}	{NA}	{NA}	{NA}	{NA}
transcript_HQ_AA_transcript11188/f3p0/3267	{XP_008804748.1; PREDICTED: ankyrin repeat domain-containing protein 13C [Phoenix dactylifera]}	{sp|Q5F259|AN13B_MOUSE; Ankyrin repeat domain-containing protein 13B OS=Mus musculus GN=Ankrd13b PE=2 SV=1}	{cic:CICLE_v10004506mg; K21437 - - - -}	{At1g04780; KOG0522 Ankyrin repeat protein R General function prediction only ;}	{GO:0005515; protein binding; molecular_function}	{XM_010558649.2; PREDICTED: Tarenaya hassleriana ankyrin repeat domain-containing protein 13C-B (LOC104826117), mRNA}	{PF13606:Ankyrin repeat}
transcript_HQ_AA_transcript11193/f15p0/3217	{XP_008784515.1; PREDICTED: uncharacterized protein LOC103703443 isoform X1 [Phoenix dactylifera]}	{NA}	{pda:103703443; - - - - -}	{NA}	{GO:0003682; chromatin binding; molecular_function}	{NA}	{PF16719:SAWADEE domain}
transcript_HQ_AA_transcript11195/f4p0/3259	{XP_009365108.1; PREDICTED: uncharacterized protein LOC103954977 [Pyrus x bretschneideri]}	{NA}	{vvi:100251719; - - - - -}	{NA}	{NA}	{XM_006357901.2; PREDICTED: Solanum tuberosum uncharacterized LOC102578142 (LOC102578142), mRNA}	{NA}
transcript_HQ_AA_transcript11196/f3p0/3321	{OAE34310.1; hypothetical protein AXG93_3235s1130 [Marchantia polymorpha subsp. polymorpha]}	{sp|Q9M7M1|ETR1_PRUPE; Ethylene receptor OS=Prunus persica GN=ETR1 PE=2 SV=1}	{pmum:103319186; K14509 ETR, ERS ethylene receptor 2.7.13.- ko04016; Environmental Information Processing; Signal transduction; MAPK signaling pathway - plant | ko04075; Environmental Information Processing; Signal transduction; Plant hormone signal transduction}	{At1g66340; KOG0519 Sensory transduction histidine kinase T Signal transduction mechanisms ;}	{GO:0007165; signal transduction; biological_process GO:0000155; two-component sensor activity; molecular_function GO:0005515; protein binding; molecular_function}	{BT105992.1; Picea glauca clone GQ02901_A05 mRNA sequence}	{PF00512:His Kinase A (phospho-acceptor) domain PF01590:GAF domain PF13492:GAF domain}
transcript_HQ_AA_transcript11198/f2p0/3265	{XP_002264659.1; PREDICTED: digalactosyldiacylglycerol synthase 1, chloroplastic [Vitis vinifera]}	{sp|Q6DW76|DGDG1_SOYBN; Digalactosyldiacylglycerol synthase 1, chloroplastic OS=Glycine max GN=DGD1 PE=2 SV=1}	{vra:106757670; K09480 E2.4.1.241 digalactosyldiacylglycerol synthase 2.4.1.241 ko00561; Metabolism; Lipid metabolism; Glycerolipid metabolism}	{NA}	{NA}	{AK355868.1; Hordeum vulgare subsp. vulgare mRNA for predicted protein, partial cds, clone: NIASHv1027D22}	{NA}
transcript_HQ_AA_transcript1120/f11p0/5581	{OAE24067.1; hypothetical protein AXG93_2402s1260 [Marchantia polymorpha subsp. polymorpha]}	{sp|Q10161|CLH_SCHPO; Probable clathrin heavy chain OS=Schizosaccharomyces pombe (strain 972 / ATCC 24843) GN=chc1 PE=1 SV=1}	{rcu:8265372; K04646 CLTC clathrin heavy chain - ko04144; Cellular Processes; Transport and catabolism; Endocytosis | ko04142; Cellular Processes; Transport and catabolism; Lysosome | ko04961; Organismal Systems; Excretory system; Endocrine and other factor-regulated calcium reabsorption | ko04721; Organismal Systems; Nervous system; Synaptic vesicle cycle | ko05016; Human Diseases; Neurodegenera…	{SPAC26A3.05; KOG0985 Vesicle coat protein clathrin, heavy chain U Intracellular trafficking, secretion, and vesicular transport ;}	{GO:0006364; rRNA processing; biological_process GO:0016192; vesicle-mediated transport; biological_process GO:0005515; protein binding; molecular_function GO:0006886; intracellular protein transport; biological_process GO:0030117; membrane coat; cellular_component GO:0032040; small-subunit processome; cellular_component GO:0005198; NA}	{NA}	{PF00637:Region in Clathrin and VPS PF08625:Utp13 specific WD40 associated domain PF13181:Tetratricopeptide repeat PF00515:Tetratricopeptide repeat PF04053:Coatomer WD associated region }
transcript_HQ_AA_transcript11203/f3p0/3272	{OAE22221.1; hypothetical protein AXG93_412s1100 [Marchantia polymorpha subsp. polymorpha]}	{NA}	{smo:SELMODRAFT_428145; - - - - -}	{NA}	{GO:0005515; protein binding; molecular_function GO:0008270; zinc ion binding; molecular_function GO:0031047; gene silencing by RNA; biological_process GO:0003723; RNA binding; molecular_function}	{BT118231.1; Picea glauca clone GQ04003_N24 mRNA sequence}	{PF13639:Ring finger domain PF17123:RING-like zinc finger PF14634:zinc-RING finger domain PF03854:P-11 zinc finger PF03468:XS domain}
transcript_HQ_AA_transcript11206/f3p0/3239	{XP_019193131.1; PREDICTED: uncharacterized protein LOC109187401 [Ipomoea nil]}	{NA}	{cit:102616640; - - - - -}	{NA}	{NA}	{NA}	{NA}
transcript_HQ_AA_transcript11211/f2p0/3237	{ERN11510.1; hypothetical protein AMTR_s00022p00117220 [Amborella trichopoda]}	{sp|Q8LGU6|CD27B_ARATH; Cell division cycle protein 27 homolog B OS=Arabidopsis thaliana GN=CDC27B PE=1 SV=1}	{atr:18439708; K03350 APC3, CDC27 anaphase-promoting complex subunit 3 - ko04120; Genetic Information Processing; Folding, sorting and degradation; Ubiquitin mediated proteolysis | ko04110; Cellular Processes; Cell growth and death; Cell cycle | ko04111; Cellular Processes; Cell growth and death; Cell cycle - yeast | ko04113; Cellular Processes; Cell growth and death; Meiosis - yeast | ko04114; C…	{At3g16320; KOG1126 DNA-binding cell division cycle control protein D Cell cycle control, cell division, chromosome partitioning ;}	{GO:0008318; protein prenyltransferase activity; molecular_function GO:0005515; protein binding; molecular_function GO:0018342; protein prenylation; biological_process}	{XM_010251231.2; PREDICTED: Nelumbo nucifera cell division cycle protein 27 homolog B (LOC104592075), transcript variant X1, mRNA}	{PF13414:TPR repeat PF00515:Tetratricopeptide repeat PF13174:Tetratricopeptide repeat PF13374:Tetratricopeptide repeat PF01239:Protein prenyltransferase alpha subunit repeat PF13176:Tetratricopeptide repeat PF13181:Tetratricopeptide repeat PF13371:Tetratricopeptide repeat}
transcript_HQ_AA_transcript11214/f2p0/3249	{XP_006827756.1; PREDICTED: ABC transporter F family member 3 [Amborella trichopoda]}	{sp|Q8H0V6|AB3F_ARATH; ABC transporter F family member 3 OS=Arabidopsis thaliana GN=ABCF3 PE=1 SV=1}	{pda:103698293; K06158 ABCF3 ATP-binding cassette, subfamily F, member 3 - -}	{At1g64550; KOG0062 ATPase component of ABC transporters with duplicated ATPase domains/Translation elongation factor EF-3b EJ Amino acid transport and metabolism ; Translation, ribosomal structure and biogenesis ;}	{GO:0003924; GTPase activity; molecular_function GO:0006614; SRP-dependent cotranslational protein targeting to membrane; biological_process GO:0098519; NA GO:0005524; ATP binding; molecular_function GO:0005525; GTP binding; molecular_function GO:0016887; ATPase activity; molecular_function GO:0003724; RNA helicase activity; molecular_function GO:0003723; RNA binding; molecular_function}	{BT114213.1; Picea glauca clone GQ03510_F14 mRNA sequence}	{PF03193:Protein of unknown function, DUF258 PF00004:ATPase family associated with various cellular activities (AAA) PF00910:RNA helicase PF01926:50S ribosome-binding GTPase PF00448:SRP54-type protein, GTPase domain PF00005:ABC transporter PF07728:AAA domain (dynein-related subfamily) PF13304:AAA domain, putative AbiEii toxin, Type IV TA system PF03266:NTPase}
transcript_HQ_AA_transcript11215/f2p0/3271	{NA}	{sp|O43059|SYP1_SCHPO; Cytoskeletal protein syp1 OS=Schizosaccharomyces pombe (strain 972 / ATCC 24843) GN=syp1 PE=1 SV=1}	{NA}	{NA}	{NA}	{NA}	{NA}
transcript_HQ_AA_transcript11216/f2p0/3235	{JAT62640.1; Polyadenylate-binding protein, cytoplasmic and nuclear [Anthurium amnicola]}	{sp|Q2UK72|PABP_ASPOR; Polyadenylate-binding protein, cytoplasmic and nuclear OS=Aspergillus oryzae (strain ATCC 42149 / RIB 40) GN=pab1 PE=3 SV=1}	{cvr:CHLNCDRAFT_59028; K13126 PABPC polyadenylate-binding protein - ko03013; Genetic Information Processing; Translation; RNA transport | ko03015; Genetic Information Processing; Translation; mRNA surveillance pathway | ko03018; Genetic Information Processing; Folding, sorting and degradation; RNA degradation}	{SPAC57A7.04c; KOG0123 Polyadenylate-binding protein (RRM superfamily) AJ RNA processing and modification ; Translation, ribosomal structure and biogenesis ;}	{GO:0003676; nucleic acid binding; molecular_function GO:0003723; RNA binding; molecular_function}	{AK110296.1; Oryza sativa Japonica Group cDNA clone:002-163-H06, full insert sequence}	{PF16367:RNA recognition motif PF00658:Poly-adenylate binding protein, unique domain PF00076:RNA recognition motif. (a.k.a. RRM, RBD, or RNP domain) PF08777:RNA binding motif}
transcript_HQ_AA_transcript11217/f2p0/3245	{XP_006858584.1; PREDICTED: regulator of nonsense transcripts UPF3 isoform X2 [Amborella trichopoda]}	{sp|Q9FVW4|RENT3_ARATH; Regulator of nonsense transcripts UPF3 OS=Arabidopsis thaliana GN=UPF3 PE=1 SV=1}	{atr:18448461; K14328 UPF3, RENT3 regulator of nonsense transcripts 3 - ko03013; Genetic Information Processing; Translation; RNA transport | ko03015; Genetic Information Processing; Translation; mRNA surveillance pathway}	{At1g33980; KOG1295 Nonsense-mediated decay protein Upf3 A RNA processing and modification ;}	{NA}	{NA}	{NA}
transcript_HQ_AA_transcript11219/f2p0/3242	{KQL03489.1; hypothetical protein SETIT_000736mg [Setaria italica]}	{sp|P15258|RAL2_SCHPO; Protein ral2 OS=Schizosaccharomyces pombe (strain 972 / ATCC 24843) GN=ral2 PE=1 SV=1}	{mpp:MICPUCDRAFT_18187; - - - - -}	{SPBC21.05c; KOG0379 Kelch repeat-containing proteins R General function prediction only ;}	{GO:0005515; protein binding; molecular_function}	{NA}	{PF00651:BTB/POZ domain PF07646:Kelch motif PF01344:Kelch motif}
transcript_HQ_AA_transcript11220/f2p0/3254	{XP_009372621.1; PREDICTED: ninja-family protein 1-like [Pyrus x bretschneideri]}	{sp|B6TNQ7|NNJA6_MAIZE; Ninja-family protein 6 OS=Zea mays PE=2 SV=1}	{pper:PRUPE_ppa022619mg; - - - - -}	{NA}	{NA}	{NA}	{NA}
transcript_HQ_AA_transcript11223/f2p0/3246	{XP_010246931.1; PREDICTED: uncharacterized protein LOC104590097 [Nelumbo nucifera]}	{NA}	{atr:18439962; - - - - -}	{NA}	{GO:0008270; zinc ion binding; molecular_function GO:0005634; nucleus; cellular_component}	{XM_010461524.1; PREDICTED: Camelina sativa uncharacterized LOC104740815 (LOC104740815), mRNA}	{PF06524:NOA36 protein}
transcript_HQ_AA_transcript11235/f3p0/3275	{XP_011627094.1; PREDICTED: pre-mRNA-processing factor 39 [Amborella trichopoda]}	{sp|Q4KLU2|PRP39_XENLA; Pre-mRNA-processing factor 39 OS=Xenopus laevis GN=prpf39 PE=2 SV=1}	{pper:PRUPE_ppa001458mg; K13217 PRPF39, PRP39 pre-mRNA-processing factor 39 - -}	{At1g04080; KOG1258 mRNA processing protein A RNA processing and modification ;}	{GO:0006397; mRNA processing; biological_process GO:0005634; nucleus; cellular_component}	{BT111443.1; Picea glauca clone GQ03237_M14 mRNA sequence}	{PF05843:Suppressor of forked protein (Suf)}
transcript_HQ_AA_transcript11237/f3p0/3297	{XP_010260581.1; PREDICTED: potassium transporter 10-like [Nelumbo nucifera]}	{sp|Q9SA05|POT10_ARATH; Potassium transporter 10 OS=Arabidopsis thaliana GN=POT10 PE=2 SV=2}	{nnu:104599659; K03549 kup KUP system potassium uptake protein - -}	{NA}	{GO:0015079; potassium ion transmembrane transporter activity; molecular_function GO:0016020; membrane; cellular_component GO:0071805; potassium ion transmembrane transport; biological_process}	{XM_017587310.1; PREDICTED: Vigna angularis potassium transporter 10-like (LOC108347863), transcript variant X2, mRNA}	{PF02705:K+ potassium transporter}
transcript_HQ_AA_transcript11239/f2p0/3245	{XP_010259324.1; PREDICTED: serine/threonine-protein phosphatase 4 regulatory subunit 3-like isoform X1 [Nelumbo nucifera]}	{sp|Q6INN7|PP4R3_XENLA; Serine/threonine-protein phosphatase 4 regulatory subunit 3 OS=Xenopus laevis GN=smek1 PE=2 SV=1}	{nnu:104598797; K17491 SMEK, PPP4R3 protein phosphatase 4 regulatory subunit 3 - ko04922; Organismal Systems; Endocrine system; Glucagon signaling pathway | ko04212; Organismal Systems; Aging; Longevity regulating pathway - worm}	{At3g06670; KOG2175 Protein predicted to be involved in carbohydrate metabolism G Carbohydrate transport and metabolism ;}	{GO:0046907; intracellular transport; biological_process}	{KF313497.1; Firmiana danxiaensis microsatellite a5426_SSR40 sequence}	{PF00638:RanBP1 domain}
transcript_HQ_AA_transcript11240/f2p0/3245	{XP_010275469.1; PREDICTED: putative glycerol-3-phosphate transporter 4 [Nelumbo nucifera]}	{sp|O23596|GLPT4_ARATH; Putative glycerol-3-phosphate transporter 4 OS=Arabidopsis thaliana GN=At4g17550 PE=3 SV=2}	{eus:EUTSA_v10024874mg; K13783 SLC37A1_2 MFS transporter, OPA family, solute carrier family 37 (glycerol-3-phosphate transporter), member 1/2 - -}	{At4g17550; KOG2533 Permease of the major facilitator superfamily G Carbohydrate transport and metabolism ;}	{GO:0016021; integral to membrane; cellular_component GO:0022857; transmembrane transporter activity; molecular_function GO:0055085; transmembrane transport; biological_process}	{XM_016011598.1; PREDICTED: Ziziphus jujuba putative glycerol-3-phosphate transporter 4 (LOC107404626), mRNA}	{PF07690:Major Facilitator Superfamily PF00083:Sugar (and other) transporter}
transcript_HQ_AA_transcript11241/f2p0/3244	{XP_011459234.1; PREDICTED: transcriptional corepressor LEUNIG isoform X2 [Fragaria vesca subsp. vesca]}	{sp|Q9FUY2|LEUNG_ARATH; Transcriptional corepressor LEUNIG OS=Arabidopsis thaliana GN=LUG PE=1 SV=2}	{fve:101298484; - - - - -}	{At4g32551; KOG0266 WD40 repeat-containing protein R General function prediction only ;}	{GO:0000077; DNA damage checkpoint; biological_process GO:0016021; integral to membrane; cellular_component GO:0015743; malate transport; biological_process GO:0005669; transcription factor TFIID complex; cellular_component GO:0033588; Elongator holoenzyme complex; cellular_component GO:0005672; transcription factor TFIIA complex; cellular_component GO:0005515; protein binding; molecular_function…	{BT113974.1; Picea glauca clone GQ03505_L12 mRNA sequence}	{PF04762:IKI3 family PF02932:Neurotransmitter-gated ion-channel transmembrane region PF09726:Transmembrane protein PF06459:Ryanodine Receptor TM 4-6 PF02862:DDHD domain PF09798:DNA damage checkpoint protein PF00400:WD domain, G-beta repeat PF11744:Aluminium activated malate transporter PF03153:Transcription factor IIA, alpha/beta subunit PF05236:Transcription initiation factor TFIID component TAF…
transcript_HQ_AA_transcript11244/f2p0/3244	{XP_018828051.1; PREDICTED: probable galacturonosyltransferase 4 isoform X2 [Juglans regia]}	{sp|Q93ZX7|GAUT4_ARATH; Probable galacturonosyltransferase 4 OS=Arabidopsis thaliana GN=GAUT4 PE=2 SV=1}	{nnu:104594381; K13648 GAUT alpha-1,4-galacturonosyltransferase 2.4.1.43 ko00520; Metabolism; Carbohydrate metabolism; Amino sugar and nucleotide sugar metabolism}	{NA}	{GO:0016757; transferase activity, transferring glycosyl groups; molecular_function GO:0005794; Golgi apparatus; cellular_component}	{BT116347.1; Picea glauca clone GQ03716_P13 mRNA sequence}	{PF01501:Glycosyl transferase family 8 PF15070:Putative golgin subfamily A member 2-like protein 5}
transcript_HQ_AA_transcript11245/f5p0/3241	{ABR16103.1; unknown [Picea sitchensis]}	{sp|Q9SZA7|DRL29_ARATH; Probable disease resistance protein At4g33300 OS=Arabidopsis thaliana GN=At4g33300 PE=2 SV=3}	{pda:103709150; - - - - -}	{NA}	{GO:0004715; non-membrane spanning protein tyrosine kinase activity; molecular_function GO:0006468; protein phosphorylation; biological_process GO:0005524; ATP binding; molecular_function GO:0043531; ADP binding; molecular_function}	{JQ443166.1; Pinus cembra isolate AcesapD11 hypothetical protein (CL71Contig1_04) gene, partial cds}	{PF08919:F-actin binding PF00931:NB-ARC domain}
transcript_HQ_AA_transcript11247/f2p0/3248	{ADE75755.1; unknown [Picea sitchensis]}	{sp|P59326|YTHD1_MOUSE; YTH domain-containing family protein 1 OS=Mus musculus GN=Ythdf1 PE=1 SV=1}	{atr:18448943; K20102 YTHDF YTH domain-containing family protein - -}	{At1g79270; KOG1901 Uncharacterized high-glucose-regulated protein R General function prediction only ;}	{GO:0003723; RNA binding; molecular_function}	{XM_015832597.1; PREDICTED: Oryza brachyantha uncharacterized LOC102707720 (LOC102707720), transcript variant X2, mRNA}	{PF04146:YT521-B-like domain}
transcript_HQ_AA_transcript11248/f4p0/3241	{BAJ91236.1; predicted protein [Hordeum vulgare subsp. vulgare]}	{sp|Q2UGK3|DED1_ASPOR; ATP-dependent RNA helicase ded1 OS=Aspergillus oryzae (strain ATCC 42149 / RIB 40) GN=ded1 PE=3 SV=1}	{csl:COCSUDRAFT_63003; K11594 DDX3X, bel ATP-dependent RNA helicase DDX3X 3.6.4.13 ko04622; Organismal Systems; Immune system; RIG-I-like receptor signaling pathway | ko05203; Human Diseases; Cancers: Overview; Viral carcinogenesis | ko05161; Human Diseases; Infectious diseases: Viral; Hepatitis B}	{SPCC1795.11; KOG0335 ATP-dependent RNA helicase A RNA processing and modification ;}	{GO:0005634; nucleus; cellular_component GO:0016787; hydrolase activity; molecular_function GO:0003677; DNA binding; molecular_function GO:0005524; ATP binding; molecular_function GO:0003676; nucleic acid binding; molecular_function}	{AK110107.1; Oryza sativa Japonica Group cDNA clone:002-161-A04, full insert sequence}	{PF06862:Utp25, U3 small nucleolar RNA-associated SSU processome protein 25 PF00270:DEAD/DEAH box helicase PF04851:Type III restriction enzyme, res subunit}
transcript_HQ_AA_transcript11250/f2p0/3246	{XP_015574734.1; PREDICTED: SWI/SNF-related matrix-associated actin-dependent regulator of chromatin subfamily A-like protein 1 [Ricinus communis]}	{sp|Q498E7|SMAL1_XENLA; SWI/SNF-related matrix-associated actin-dependent regulator of chromatin subfamily A-like protein 1 OS=Xenopus laevis GN=smarcal1 PE=2 SV=1}	{cic:CICLE_v10004488mg; K14440 SMARCAL1, HARP SWI/SNF-related matrix-associated actin-dependent regulator of chromatin subfamily A-like protein 1 3.6.4.12 -}	{At1g48310; KOG1000 Chromatin remodeling protein HARP/SMARCAL1, DEAD-box superfamily B Chromatin structure and dynamics ;}	{GO:0016787; hydrolase activity; molecular_function GO:0005524; ATP binding; molecular_function GO:0003677; DNA binding; molecular_function}	{XM_009146769.2; PREDICTED: Brassica rapa SWI/SNF-related matrix-associated actin-dependent regulator of chromatin subfamily A-like protein 1 (LOC103868684), transcript variant X2, mRNA}	{PF04851:Type III restriction enzyme, res subunit PF00176:SNF2 family N-terminal domain}
transcript_HQ_AA_transcript11254/f2p0/3254	{XP_018858974.1; PREDICTED: clathrin interactor EPSIN 2 isoform X2 [Juglans regia]}	{sp|Q67YI9|EPN2_ARATH; Clathrin interactor EPSIN 2 OS=Arabidopsis thaliana GN=EPSIN2 PE=1 SV=1}	{atr:18995820; K12471 EPN epsin - ko04144; Cellular Processes; Transport and catabolism; Endocytosis}	{At2g43160; KOG2056 Equilibrative nucleoside transporter protein F Nucleotide transport and metabolism ;}	{GO:0006886; intracellular protein transport; biological_process GO:0005543; phospholipid binding; molecular_function}	{EF087421.1; Picea sitchensis clone WS02816_F23 unknown mRNA}	{PF00790:VHS domain PF07651:ANTH domain}
transcript_HQ_AA_transcript11256/f5p0/3235	{XP_009348144.1; PREDICTED: uncharacterized leucine-rich repeat-containing protein C926.06c-like [Pyrus x bretschneideri]}	{sp|Q9UUG2|YFT6_SCHPO; Uncharacterized leucine-rich repeat-containing protein C926.06c OS=Schizosaccharomyces pombe (strain 972 / ATCC 24843) GN=SPAC926.06c PE=1 SV=1}	{NA}	{NA}	{GO:0005515; protein binding; molecular_function}	{NA}	{PF13516:Leucine Rich repeat PF00560:Leucine Rich Repeat PF13855:Leucine rich repeat}
transcript_HQ_AA_transcript11261/f5p0/3236	{XP_011626077.1; PREDICTED: trihelix transcription factor GTL1 isoform X2 [Amborella trichopoda]}	{sp|Q9C882|GTL1_ARATH; Trihelix transcription factor GTL1 OS=Arabidopsis thaliana GN=GTL1 PE=1 SV=2}	{atr:18441613; - - - - -}	{At1g33240; KOG4282 Transcription factor GT-2 and related proteins, contains trihelix DNA-binding/SANT domain K Transcription ;}	{NA}	{XM_018826494.1; PREDICTED: Musa acuminata subsp. malaccensis trihelix transcription factor GTL1-like (LOC103985715), transcript variant X3, mRNA}	{NA}
transcript_HQ_AA_transcript11265/f2p0/3243	{XP_006826301.1; PREDICTED: YTH domain-containing family protein 1 isoform X1 [Amborella trichopoda]}	{sp|P59326|YTHD1_MOUSE; YTH domain-containing family protein 1 OS=Mus musculus GN=Ythdf1 PE=1 SV=1}	{pmum:103321408; K20102 YTHDF YTH domain-containing family protein - -}	{At3g13460; KOG1901 Uncharacterized high-glucose-regulated protein R General function prediction only ;}	{GO:0003723; RNA binding; molecular_function}	{XR_002163785.1; PREDICTED: Elaeis guineensis YTH domain-containing family protein 2 (LOC105036247), transcript variant X3, misc_RNA}	{PF04146:YT521-B-like domain}
transcript_HQ_AA_transcript11267/f2p0/3243	{XP_004144331.1; PREDICTED: uncharacterized protein LOC101219097 [Cucumis sativus]}	{NA}	{gra:105788298; - - - - -}	{NA}	{NA}	{BT112397.1; Picea glauca clone GQ03314_H20 mRNA sequence}	{NA}
transcript_HQ_AA_transcript11274/f2p0/3194	{KRG98680.1; hypothetical protein GLYMA_18G090200 [Glycine max]}	{NA}	{gmx:102659952; - - - - -}	{NA}	{NA}	{NA}	{NA}
transcript_HQ_AA_transcript11275/f2p0/3301	{XP_010267513.1; PREDICTED: pentatricopeptide repeat-containing protein At2g13600-like [Nelumbo nucifera]}	{sp|Q9SIT7|PP151_ARATH; Pentatricopeptide repeat-containing protein At2g13600 OS=Arabidopsis thaliana GN=PCMP-E76 PE=3 SV=1}	{spen:107014888; - - - - -; spen:107014888; - - - - -}	{At2g13600; KOG4197 FOG: PPR repeat R General function prediction only ;}	{GO:0008270; zinc ion binding; molecular_function}	{BT119956.1; Picea glauca clone GQ04113_B16 mRNA sequence}	{PF14432:DYW family of nucleic acid deaminases}
transcript_HQ_AA_transcript11277/f3p0/3254	{JAT60442.1; E3 ubiquitin-protein ligase RNF167 [Anthurium amnicola]}	{sp|Q9H6Y7|RN167_HUMAN; E3 ubiquitin-protein ligase RNF167 OS=Homo sapiens GN=RNF167 PE=1 SV=1}	{ppp:PHYPADRAFT_16563; K15692 RNF13, RZF E3 ubiquitin-protein ligase RNF13 2.3.2.27 -}	{Hs14149702; KOG4628 Predicted E3 ubiquitin ligase O Posttranslational modification, protein turnover, chaperones ;}	{GO:0004842; ubiquitin-protein ligase activity; molecular_function GO:0005515; protein binding; molecular_function GO:0046872; metal ion binding; molecular_function GO:0005680; anaphase-promoting complex; cellular_component GO:0008270; zinc ion binding; molecular_function}	{NA}	{PF00628:PHD-finger PF17123:RING-like zinc finger PF12906:RING-variant domain PF14634:zinc-RING finger domain PF00097:Zinc finger, C3HC4 type (RING finger) PF12861:Anaphase-promoting complex subunit 11 RING-H2 finger PF13639:Ring finger domain PF12678:RING-H2 zinc finger domain}
transcript_HQ_AA_transcript11280/f3p0/3230	{ERM96448.1; hypothetical protein AMTR_s00001p00252660 [Amborella trichopoda]}	{sp|F4HQA1|PAF1_ARATH; Protein PAF1 homolog OS=Arabidopsis thaliana GN=VIP2 PE=1 SV=1}	{nnu:104597147; K15174 PAF1 RNA polymerase II-associated factor 1 - ko04011; Environmental Information Processing; Signal transduction; MAPK signaling pathway - yeast}	{At1g79730; KOG2478 Putative RNA polymerase II regulator K Transcription ;}	{GO:0006368; transcription elongation from RNA polymerase II promoter; biological_process GO:0016570; histone modification; biological_process GO:0016593; Cdc73/Paf1 complex; cellular_component}	{NA}	{PF03985:Paf1 }
transcript_HQ_AA_transcript11283/f3p0/3240	{XP_011037170.1; PREDICTED: beta-galactosidase 5-like [Populus euphratica]}	{sp|Q4WS33|BGALA_ASPFU; Probable beta-galactosidase A OS=Neosartorya fumigata (strain ATCC MYA-4609 / Af293 / CBS 101355 / FGSC A1100) GN=lacA PE=3 SV=2}	{gsl:Gasu_09330; - - - - -}	{At1g72990; KOG0496 Beta-galactosidase G Carbohydrate transport and metabolism ;}	{NA}	{NA}	{NA}
transcript_HQ_AA_transcript11284/f2p0/3244	{NA}	{NA}	{NA}	{NA}	{NA}	{NA}	{NA}
transcript_HQ_AA_transcript11287/f2p0/3239	{CDX74304.1; BnaA03g27430D [Brassica napus]}	{sp|P46942|DB10_NICSY; ATP-dependent RNA helicase-like protein DB10 OS=Nicotiana sylvestris PE=2 SV=1}	{nnu:104591406; K12823 DDX5, DBP2 ATP-dependent RNA helicase DDX5/DBP2 3.6.4.13 ko03040; Genetic Information Processing; Transcription; Spliceosome | ko05202; Human Diseases; Cancers: Overview; Transcriptional misregulation in cancer | ko05205; Human Diseases; Cancers: Overview; Proteoglycans in cancer}	{At3g01540; KOG0331 ATP-dependent RNA helicase A RNA processing and modification ;}	{NA}	{XM_019330058.1; PREDICTED: Ipomoea nil ATP-dependent RNA helicase-like protein DB10 (LOC109180459), transcript variant X2, mRNA}	{NA}
transcript_HQ_AA_transcript11292/f3p0/3246	{XP_002267129.1; PREDICTED: probable LRR receptor-like serine/threonine-protein kinase At1g56140 [Vitis vinifera]}	{sp|C0LGH3|Y5614_ARATH; Probable LRR receptor-like serine/threonine-protein kinase At1g56140 OS=Arabidopsis thaliana GN=At1g56140 PE=2 SV=2}	{vvi:100262365; - - - - -}	{NA}	{GO:0009405; pathogenesis; biological_process GO:0004672; protein kinase activity; molecular_function GO:0005515; protein binding; molecular_function GO:0006468; protein phosphorylation; biological_process GO:0016020; membrane; cellular_component GO:0005524; ATP binding; molecular_function}	{XM_010274440.2; PREDICTED: Nelumbo nucifera probable LRR receptor-like serine/threonine-protein kinase At1g07650 (LOC104608435), transcript variant X2, mRNA}	{PF00560:Leucine Rich Repeat PF13855:Leucine rich repeat PF07714:Protein tyrosine kinase PF00069:Protein kinase domain PF02430:Apical membrane antigen 1}
transcript_HQ_AA_transcript11298/f3p0/3237	{XP_015085074.1; PREDICTED: uncharacterized protein LOC107028503 isoform X1 [Solanum pennellii]}	{sp|Q4L6I1|RS1_STAHJ; 30S ribosomal protein S1 OS=Staphylococcus haemolyticus (strain JCSC1435) GN=rpsA PE=3 SV=1}	{lang:109342045; - - - - -; lang:109342045; - - - - -}	{NA}	{GO:0003676; nucleic acid binding; molecular_function}	{NA}	{PF00575:S1 RNA binding domain}
transcript_HQ_AA_transcript11300/f4p0/3240	{XP_010263531.1; PREDICTED: ABSCISIC ACID-INSENSITIVE 5-like protein 5 isoform X1 [Nelumbo nucifera]}	{sp|Q9M7Q4|AI5L5_ARATH; ABSCISIC ACID-INSENSITIVE 5-like protein 5 OS=Arabidopsis thaliana GN=ABF2 PE=1 SV=1}	{jcu:105633638; K14432 ABF ABA responsive element binding factor - ko04075; Environmental Information Processing; Signal transduction; Plant hormone signal transduction}	{NA}	{GO:0061617; NA GO:0005634; nucleus; cellular_component GO:0042407; cristae formation; biological_process GO:0006355; regulation of transcription, DNA-dependent; biological_process GO:0005496; steroid binding; molecular_function GO:0043565; sequence-specific DNA binding; molecular_function GO:0004882; androgen receptor activity; molecular_function GO:0030521; androgen receptor signaling pathway; …	{XM_010271358.2; PREDICTED: Nelumbo nucifera ABSCISIC ACID-INSENSITIVE 5-like protein 5 (LOC104606250), transcript variant X4, mRNA}	{PF00170:bZIP transcription factor PF09769:Apolipoprotein O PF07716:Basic region leucine zipper PF02166:Androgen receptor}
transcript_HQ_AA_transcript11302/f3p0/3296	{JAT66583.1; Transcription factor steA [Anthurium amnicola]}	{sp|O74252|STE12_EMENI; Transcription factor steA OS=Emericella nidulans (strain FGSC A4 / ATCC 38163 / CBS 112.46 / NRRL 194 / M139) GN=steA PE=2 SV=1}	{bpg:Bathy09g00490; - - - - -}	{NA}	{GO:0005634; nucleus; cellular_component GO:0046872; metal ion binding; molecular_function GO:0008270; zinc ion binding; molecular_function GO:0006355; regulation of transcription, DNA-dependent; biological_process GO:0003700; sequence-specific DNA binding transcription factor activity; molecular_function}	{NA}	{PF06524:NOA36 protein PF13465:Zinc-finger double domain PF00096:Zinc finger, C2H2 type PF02200:STE like transcription factor PF13912:C2H2-type zinc finger PF02176:TRAF-type zinc finger}
transcript_HQ_AA_transcript11303/f4p0/3207	{BAK00933.1; predicted protein [Hordeum vulgare subsp. vulgare]}	{sp|Q10327|YD72_SCHPO; Uncharacterized protein C32A11.02c OS=Schizosaccharomyces pombe (strain 972 / ATCC 24843) GN=SPAC32A11.02c PE=4 SV=1}	{NA}	{NA}	{NA}	{NA}	{NA}
transcript_HQ_AA_transcript11304/f2p0/3236	{XP_006857056.1; PREDICTED: probable xyloglucan glycosyltransferase 12 [Amborella trichopoda]}	{sp|Q9SB75|CSLC5_ARATH; Probable xyloglucan glycosyltransferase 5 OS=Arabidopsis thaliana GN=CSLC5 PE=1 SV=1}	{atr:18446889; - - - - -}	{NA}	{GO:0016757; transferase activity, transferring glycosyl groups; molecular_function}	{XM_019607685.1; PREDICTED: Lupinus angustifolius probable xyloglucan glycosyltransferase 6 (LOC109362113), mRNA}	{PF13506:Glycosyl transferase family 21}
transcript_HQ_AA_transcript11305/f2p0/3233	{BAJ95728.1; predicted protein [Hordeum vulgare subsp. vulgare]}	{sp|Q13490|BIRC2_HUMAN; Baculoviral IAP repeat-containing protein 2 OS=Homo sapiens GN=BIRC2 PE=1 SV=2}	{NA}	{Hs4502141; KOG1101 Apoptosis inhibitor IAP1 and related BIR domain proteins DR Cell cycle control, cell division, chromosome partitioning ; General function prediction only ;}	{GO:0008270; zinc ion binding; molecular_function GO:0046872; metal ion binding; molecular_function GO:0005515; protein binding; molecular_function}	{NA}	{PF00097:Zinc finger, C3HC4 type (RING finger) PF13639:Ring finger domain PF14634:zinc-RING finger domain}
transcript_HQ_AA_transcript1131/f7p0/5587	{XP_019054878.1; PREDICTED: uncharacterized protein At1g21580 [Nelumbo nucifera]}	{sp|Q3ED78|C3H7_ARATH; Zinc finger CCCH domain-containing protein 7 OS=Arabidopsis thaliana GN=At1g21570 PE=1 SV=1}	{pmum:103319896; - - - - -}	{At1g21570; KOG1492 C3H1-type Zn-finger protein R General function prediction only ;}	{GO:0017009; protein-phycocyanobilin linkage; biological_process GO:0046872; metal ion binding; molecular_function}	{AC253923.1; Aquilegia coerulea clone COL08-D18, complete sequence}	{PF09367:CpeS-like protein PF00642:Zinc finger C-x8-C-x5-C-x3-H type (and similar)}
transcript_HQ_AA_transcript11313/f2p0/3233	{XP_006828866.2; PREDICTED: mechanosensitive ion channel protein 6 [Amborella trichopoda]}	{sp|Q9LH74|MSL5_ARATH; Mechanosensitive ion channel protein 5 OS=Arabidopsis thaliana GN=MSL5 PE=2 SV=1}	{cic:CICLE_v10018823mg; - - - - -}	{At3g14810; KOG4629 Predicted mechanosensitive ion channel M Cell wall/membrane/envelope biogenesis ;}	{GO:0016020; membrane; cellular_component GO:0055085; transmembrane transport; biological_process}	{XM_018985973.1; PREDICTED: Juglans regia mechanosensitive ion channel protein 6-like (LOC109006627), transcript variant X2, mRNA}	{PF00924:Mechanosensitive ion channel}
transcript_HQ_AA_transcript11316/f3p0/3228	{XP_010662087.1; PREDICTED: origin of replication complex subunit 3 [Vitis vinifera]}	{sp|Q0IY07|ORC3_ORYSJ; Origin of replication complex subunit 3 OS=Oryza sativa subsp. japonica GN=ORC3 PE=2 SV=1}	{gra:105787985; K02605 ORC3 origin recognition complex subunit 3 - ko04110; Cellular Processes; Cell growth and death; Cell cycle | ko04111; Cellular Processes; Cell growth and death; Cell cycle - yeast | ko04113; Cellular Processes; Cell growth and death; Meiosis - yeast}	{At5g16690; KOG2538 Origin recognition complex, subunit 3 L Replication, recombination and repair ;}	{GO:0003677; DNA binding; molecular_function GO:0005664; nuclear origin of replication recognition complex; cellular_component GO:0006260; DNA replication; biological_process}	{NA}	{PF07034:Origin recognition complex (ORC) subunit 3 N-terminus}
transcript_HQ_AA_transcript11318/f4p0/3190	{ABR18347.1; unknown [Picea sitchensis]}	{sp|Q9SIV2|PSD2A_ARATH; 26S proteasome non-ATPase regulatory subunit 2 homolog A OS=Arabidopsis thaliana GN=RPN1A PE=1 SV=2}	{atr:18433907; K03028 PSMD2, RPN1 26S proteasome regulatory subunit N1 - ko03050; Genetic Information Processing; Folding, sorting and degradation; Proteasome | ko05169; Human Diseases; Infectious diseases: Viral; Epstein-Barr virus infection}	{At2g20580; KOG2005 26S proteasome regulatory complex, subunit RPN1/PSMD2 O Posttranslational modification, protein turnover, chaperones ;}	{NA}	{EF678603.1; Picea sitchensis clone WS02929_D19 unknown mRNA}	{NA}
transcript_HQ_AA_transcript11321/f2p0/3259	{ABR16103.1; unknown [Picea sitchensis]}	{sp|Q9SZA7|DRL29_ARATH; Probable disease resistance protein At4g33300 OS=Arabidopsis thaliana GN=At4g33300 PE=2 SV=3}	{bvg:104899032; - - - - -}	{NA}	{GO:0043531; ADP binding; molecular_function}	{BT114331.1; Picea glauca clone GQ03512_J05 mRNA sequence}	{PF00931:NB-ARC domain}
transcript_HQ_AA_transcript11322/f3p0/3219	{XP_006830091.1; PREDICTED: serine/threonine protein phosphatase 2A 59 kDa regulatory subunit B' gamma isoform [Amborella trichopoda]}	{sp|Q8RW96|2A5G_ARATH; Serine/threonine protein phosphatase 2A 59 kDa regulatory subunit B' gamma isoform OS=Arabidopsis thaliana GN=B'GAMMA PE=1 SV=2}	{nnu:104594080; K11584 PPP2R5 serine/threonine-protein phosphatase 2A regulatory subunit B' - ko03015; Genetic Information Processing; Translation; mRNA surveillance pathway | ko04071; Environmental Information Processing; Signal transduction; Sphingolipid signaling pathway | ko04151; Environmental Information Processing; Signal transduction; PI3K-Akt signaling pathway | ko04152; Environmental In…	{At4g15410_2; KOG2085 Serine/threonine protein phosphatase 2A, regulatory subunit T Signal transduction mechanisms ;}	{GO:0000159; protein phosphatase type 2A complex; cellular_component GO:0007165; signal transduction; biological_process GO:0019888; protein phosphatase regulator activity; molecular_function}	{BT107954.1; Picea glauca clone GQ03115_A09 mRNA sequence}	{PF01603:Protein phosphatase 2A regulatory B subunit (B56 family)}
transcript_HQ_AA_transcript11324/f2p0/3237	{XP_010266222.1; PREDICTED: U-box domain-containing protein 44-like [Nelumbo nucifera]}	{sp|Q9LM76|PUB44_ARATH; U-box domain-containing protein 44 OS=Arabidopsis thaliana GN=PUB44 PE=1 SV=1}	{pda:103710505; - - - - -}	{At1g20780; KOG0167 FOG: Armadillo/beta-catenin-like repeats S Function unknown ;}	{GO:0015991; ATP hydrolysis coupled proton transport; biological_process GO:0004842; ubiquitin-protein ligase activity; molecular_function GO:0016567; protein ubiquitination; biological_process GO:0016820; hydrolase activity, acting on acid anhydrides, catalyzing transmembrane movement of substances; molecular_function GO:0008270; zinc ion binding; molecular_function GO:0000221; vacuolar proton-t…	{BT104553.1; Picea glauca clone GQ02811_L21 mRNA sequence}	{PF02985:HEAT repeat PF04564:U-box domain PF11698:V-ATPase subunit H PF11789:Zinc-finger of the MIZ type in Nse subunit PF00514:Armadillo/beta-catenin-like repeat}
transcript_HQ_AA_transcript11325/f2p0/3317	{OAE19421.1; hypothetical protein AXG93_4273s1160 [Marchantia polymorpha subsp. polymorpha]}	{sp|Q5Z856|ADCS_ORYSJ; Probable aminodeoxychorismate synthase, chloroplastic OS=Oryza sativa subsp. japonica GN=ADCS PE=2 SV=1}	{sbi:SORBI_10g028850; K13950 pabAB para-aminobenzoate synthetase 2.6.1.85 ko00790; Metabolism; Metabolism of cofactors and vitamins; Folate biosynthesis}	{At2g28880; KOG1224 Para-aminobenzoate (PABA) synthase ABZ1 J Translation, ribosomal structure and biogenesis ;}	{GO:0016787; hydrolase activity; molecular_function GO:0006541; glutamine metabolic process; biological_process GO:0009058; biosynthetic process; biological_process}	{BT109572.1; Picea glauca clone GQ03210_B16 mRNA sequence}	{PF04715:Anthranilate synthase component I, N terminal region PF07722:Peptidase C26}
transcript_HQ_AA_transcript11329/f2p0/3231	{ACN40935.1; unknown [Picea sitchensis]}	{sp|A2XUW1|CDKG2_ORYSI; Cyclin-dependent kinase G-2 OS=Oryza sativa subsp. indica GN=CDKG-2 PE=3 SV=1}	{nnu:104591657; K08818 CDC2L cell division cycle 2-like 2.7.11.22 -}	{At1g67580; KOG0663 Protein kinase PITSLRE and related kinases R General function prediction only ;}	{GO:0005524; ATP binding; molecular_function GO:0016020; membrane; cellular_component GO:0016773; phosphotransferase activity, alcohol group as acceptor; molecular_function GO:0006468; protein phosphorylation; biological_process GO:0004672; protein kinase activity; molecular_function}	{BT071476.1; Picea sitchensis clone WS02915_J22 unknown mRNA}	{PF06293:Lipopolysaccharide kinase (Kdo/WaaP) family PF00069:Protein kinase domain PF07714:Protein tyrosine kinase}
transcript_HQ_AA_transcript1133/f3p0/5583	{XP_017980612.1; PREDICTED: ABC transporter C family member 3 isoform X3 [Theobroma cacao]}	{sp|Q9LK64|AB3C_ARATH; ABC transporter C family member 3 OS=Arabidopsis thaliana GN=ABCC3 PE=1 SV=1}	{csv:101213946; K05666 ABCC2 ATP-binding cassette, subfamily C (CFTR/MRP), member 2 - ko02010; Environmental Information Processing; Membrane transport; ABC transporters | ko04976; Organismal Systems; Digestive system; Bile secretion | ko01524; Human Diseases; Drug resistance: Antineoplastic; Platinum drug resistance | ko01523; Human Diseases; Drug resistance: Antineoplastic; Antifolate resistanc…	{At3g13080; KOG0054 Multidrug resistance-associated protein/mitoxantrone resistance protein, ABC superfamily Q Secondary metabolites biosynthesis, transport and catabolism ;}	{GO:0003677; DNA binding; molecular_function GO:0016887; ATPase activity; molecular_function GO:0005525; GTP binding; molecular_function GO:0005524; ATP binding; molecular_function GO:0043531; ADP binding; molecular_function GO:0055085; transmembrane transport; biological_process GO:0000166; nucleotide binding; molecular_function GO:0003924; GTPase activity; molecular_function GO:0016021; integra…	{XM_010254431.2; PREDICTED: Nelumbo nucifera ABC transporter C family member 3-like (LOC104594225), transcript variant X3, mRNA}	{PF06414:Zeta toxin PF01926:50S ribosome-binding GTPase PF00005:ABC transporter PF03193:Protein of unknown function, DUF258 PF01443:Viral (Superfamily 1) RNA helicase PF00437:Type II/IV secretion system protein PF00735:Septin PF13304:AAA domain, putative AbiEii toxin, Type IV TA system PF00931:NB-ARC domain PF00664:ABC transporter transmembrane region PF01580:FtsK/SpoIIIE family}
transcript_HQ_AA_transcript11334/f2p0/3261	{CDY14108.1; BnaC02g02250D [Brassica napus]}	{sp|P38163|SRO77_YEAST; Lethal(2) giant larvae protein homolog SRO77 OS=Saccharomyces cerevisiae (strain ATCC 204508 / S288c) GN=SRO77 PE=1 SV=2}	{pda:103709502; K08518 STXBP5, SRO7_77 syntaxin-binding protein 5 - -}	{YBL106c; KOG1983 Tomosyn and related SNARE-interacting proteins U Intracellular trafficking, secretion, and vesicular transport ;}	{GO:0005515; protein binding; molecular_function}	{NA}	{PF00400:WD domain, G-beta repeat}
transcript_HQ_AA_transcript11337/f5p0/3182	{ACN39846.1; unknown [Picea sitchensis]}	{sp|Q9SB64|NBR1_ARATH; Protein NBR1 homolog OS=Arabidopsis thaliana GN=NBR1 PE=1 SV=1}	{nnu:104593082; K17987 NBR1 next to BRCA1 gene 1 protein - -}	{At4g24690_2; KOG4351 Uncharacterized conserved protein S Function unknown ;}	{GO:0008270; zinc ion binding; molecular_function GO:0005515; protein binding; molecular_function}	{BT117527.1; Picea glauca clone GQ03902_F22 mRNA sequence}	{PF00564:PB1 domain PF00569:Zinc finger, ZZ type}
transcript_HQ_AA_transcript1134/f2p0/5582	{XP_010252790.1; PREDICTED: E3 ubiquitin-protein ligase UPL1-like [Nelumbo nucifera]}	{sp|Q8GY23|UPL1_ARATH; E3 ubiquitin-protein ligase UPL1 OS=Arabidopsis thaliana GN=UPL1 PE=1 SV=3}	{nnu:104594266; K10592 HUWE1, MULE, ARF-BP1 E3 ubiquitin-protein ligase HUWE1 2.3.2.26 ko04120; Genetic Information Processing; Folding, sorting and degradation; Ubiquitin mediated proteolysis}	{At1g70320; KOG0939 E3 ubiquitin-protein ligase/Putative upstream regulatory element binding protein OK Posttranslational modification, protein turnover, chaperones ; Transcription ;}	{GO:0005515; protein binding; molecular_function}	{XM_019196073.1; PREDICTED: Nelumbo nucifera E3 ubiquitin-protein ligase UPL1-like (LOC104587890), transcript variant X2, mRNA}	{PF02985:HEAT repeat PF00514:Armadillo/beta-catenin-like repeat}
transcript_HQ_AA_transcript11341/f2p0/3227	{XP_009406006.1; PREDICTED: uncharacterized protein LOC103989008 isoform X2 [Musa acuminata subsp. malaccensis]}	{sp|Q4I7L0|HAT2_GIBZE; Histone acetyltransferase type B subunit 2 OS=Gibberella zeae (strain PH-1 / ATCC MYA-4620 / FGSC 9075 / NRRL 31084) GN=HAT2 PE=3 SV=2}	{mus:103996539; - - - - -}	{NA}	{GO:0005515; protein binding; molecular_function}	{BT107732.1; Picea glauca clone GQ03112_B03 mRNA sequence}	{PF13855:Leucine rich repeat PF00400:WD domain, G-beta repeat PF00560:Leucine Rich Repeat}
transcript_HQ_AA_transcript11343/f2p0/3247	{NA}	{sp|Q59VM4|RPN4_CANAL; Transcriptional regulator RPN4 OS=Candida albicans (strain SC5314 / ATCC MYA-2876) GN=RPN4 PE=1 SV=1}	{NA}	{NA}	{GO:0003677; DNA binding; molecular_function GO:0046872; metal ion binding; molecular_function}	{NA}	{PF02892:BED zinc finger PF00096:Zinc finger, C2H2 type}
transcript_HQ_AA_transcript11344/f2p0/3238	{ABR18034.1; unknown [Picea sitchensis]}	{sp|A4VCM0|NAC45_ARATH; NAC domain-containing protein 45 OS=Arabidopsis thaliana GN=NAC045 PE=2 SV=1}	{cic:CICLE_v10005341mg; - - - - -}	{NA}	{GO:0006355; regulation of transcription, DNA-dependent; biological_process GO:0003677; DNA binding; molecular_function}	{NA}	{PF02365:No apical meristem (NAM) protein}
transcript_HQ_AA_transcript11346/f2p0/3229	{XP_010255870.1; PREDICTED: DDT domain-containing protein DDR4-like isoform X1 [Nelumbo nucifera]}	{sp|F4IDY7|DDR4_ARATH; DDT domain-containing protein DDR4 OS=Arabidopsis thaliana GN=DDR4 PE=1 SV=1}	{nnu:104596414; - - - - -}	{NA}	{NA}	{NA}	{NA}
transcript_HQ_AA_transcript11347/f2p0/3324	{GAV72839.1; O-FucT domain-containing protein [Cephalotus follicularis]}	{sp|Q8W486|Y1491_ARATH; Uncharacterized protein At1g04910 OS=Arabidopsis thaliana GN=At1g04910 PE=2 SV=1}	{vvi:100260861; - - - - -}	{NA}	{NA}	{XM_019402461.1; PREDICTED: Nicotiana attenuata uncharacterized protein At1g04910-like (LOC109236263), transcript variant X2, mRNA}	{NA}
transcript_HQ_AA_transcript11349/f2p0/3242	{ERN18128.1; hypothetical protein AMTR_s00054p00046250 [Amborella trichopoda]}	{NA}	{atr:18446479; - - - - -}	{NA}	{GO:0016787; hydrolase activity; molecular_function}	{XM_011629609.1; PREDICTED: Amborella trichopoda uncharacterized LOC18446479 (LOC18446479), mRNA}	{PF00149:Calcineurin-like phosphoesterase}
transcript_HQ_AA_transcript11350/f4p0/3222	{XP_006481828.1; PREDICTED: 1,4-alpha-glucan-branching enzyme 2-2, chloroplastic/amyloplastic isoform X1 [Citrus sinensis]}	{sp|Q41058|GLGB1_PEA; 1,4-alpha-glucan-branching enzyme 1, chloroplastic/amyloplastic OS=Pisum sativum GN=SBEI PE=1 SV=1}	{nnu:104587877; K00700 GBE1, glgB 1,4-alpha-glucan branching enzyme 2.4.1.18 ko00500; Metabolism; Carbohydrate metabolism; Starch and sucrose metabolism}	{At5g03650; KOG0470 1,4-alpha-glucan branching enzyme/starch branching enzyme II G Carbohydrate transport and metabolism ;}	{GO:0005975; carbohydrate metabolic process; biological_process GO:0003824; NA GO:0043169; cation binding; molecular_function GO:0004553; hydrolase activity, hydrolyzing O-glycosyl compounds; molecular_function}	{XM_009367082.2; PREDICTED: Pyrus x bretschneideri 1,4-alpha-glucan-branching enzyme 2-2, chloroplastic/amyloplastic-like (LOC103955206), transcript variant X2, mRNA}	{PF02922:Carbohydrate-binding module 48 (Isoamylase N-terminal domain) PF02806:Alpha amylase, C-terminal all-beta domain PF00128:Alpha amylase, catalytic domain}
transcript_HQ_AA_transcript11351/f2p0/3235	{XP_006828866.2; PREDICTED: mechanosensitive ion channel protein 6 [Amborella trichopoda]}	{sp|Q9LH74|MSL5_ARATH; Mechanosensitive ion channel protein 5 OS=Arabidopsis thaliana GN=MSL5 PE=2 SV=1}	{cic:CICLE_v10018823mg; - - - - -}	{At3g14810; KOG4629 Predicted mechanosensitive ion channel M Cell wall/membrane/envelope biogenesis ;}	{GO:0055085; transmembrane transport; biological_process GO:0016020; membrane; cellular_component}	{XM_018985973.1; PREDICTED: Juglans regia mechanosensitive ion channel protein 6-like (LOC109006627), transcript variant X2, mRNA}	{PF00924:Mechanosensitive ion channel}
transcript_HQ_AA_transcript11359/f2p0/3263	{GAV63096.1; WD40 domain-containing protein [Cephalotus follicularis]}	{sp|Q9C0C7|AMRA1_HUMAN; Activating molecule in BECN1-regulated autophagy protein 1 OS=Homo sapiens GN=AMBRA1 PE=1 SV=2}	{gra:105798577; K17985 AMBRA1 activating molecule in BECN1-regulated autophagy protein 1 - ko04140; Cellular Processes; Transport and catabolism; Autophagy - animal}	{At5g43930; KOG0266 WD40 repeat-containing protein R General function prediction only ;}	{GO:0005515; protein binding; molecular_function}	{BT114479.1; Picea glauca clone GQ03515_F06 mRNA sequence}	{PF00400:WD domain, G-beta repeat}
transcript_HQ_AA_transcript11363/f2p0/3227	{XP_006852218.2; PREDICTED: protein terminal ear1 [Amborella trichopoda]}	{sp|O65001|TE1_MAIZE; Protein terminal ear1 OS=Zea mays GN=TE1 PE=2 SV=1}	{atr:18441931; - - - - -}	{At3g26120; KOG4660 Protein Mei2, essential for commitment to meiosis, and related proteins D Cell cycle control, cell division, chromosome partitioning ;}	{GO:0003676; nucleic acid binding; molecular_function}	{AC240787.1; Oryza glaberrima clone OG_BBa0045H05, complete sequence}	{PF00076:RNA recognition motif. (a.k.a. RRM, RBD, or RNP domain)}
transcript_HQ_AA_transcript11364/f2p0/3238	{AJP06309.1; KRF1 [Pinus tabuliformis]}	{sp|Q9LI89|FBK70_ARATH; F-box/kelch-repeat protein At3g27150 OS=Arabidopsis thaliana GN=At3g27150 PE=2 SV=1}	{nnu:104591703; - - - - -}	{At3g27150; KOG1072 FOG: Kelch repeat R General function prediction only ;}	{GO:0005515; protein binding; molecular_function}	{KJ711064.1; Pinus tabuliformis clone PtKRF1 KRF1 mRNA, complete cds}	{PF01344:Kelch motif PF07646:Kelch motif}
transcript_HQ_AA_transcript1137/f3p0/5587	{XP_010269203.1; PREDICTED: probable helicase DDB_G0274399 [Nelumbo nucifera]}	{sp|Q00416|SEN1_YEAST; Helicase SEN1 OS=Saccharomyces cerevisiae (strain ATCC 204508 / S288c) GN=SEN1 PE=1 SV=2}	{egu:105042378; K10706 SETX, ALS4 senataxin 3.6.4.- -}	{At4g30100; KOG1801 tRNA-splicing endonuclease positive effector (SEN1) A RNA processing and modification ;}	{GO:0003677; DNA binding; molecular_function GO:0005524; ATP binding; molecular_function GO:0016787; hydrolase activity; molecular_function}	{XM_011014335.1; PREDICTED: Populus euphratica uncharacterized ATP-dependent helicase C29A10.10c-like (LOC105116842), mRNA}	{PF04851:Type III restriction enzyme, res subunit}
transcript_HQ_AA_transcript11371/f2p0/3235	{XP_010256889.1; PREDICTED: ATP-dependent zinc metalloprotease FTSH 10, mitochondrial-like [Nelumbo nucifera]}	{sp|Q0DHL4|FTSH8_ORYSJ; ATP-dependent zinc metalloprotease FTSH 8, mitochondrial OS=Oryza sativa subsp. japonica GN=FTSH8 PE=3 SV=1}	{nnu:104597164; K08956 AFG3 AFG3 family protein 3.4.24.- -}	{At2g29080; KOG0731 AAA+-type ATPase containing the peptidase M41 domain O Posttranslational modification, protein turnover, chaperones ;}	{GO:0003678; DNA helicase activity; molecular_function GO:0006508; proteolysis; biological_process GO:0009378; four-way junction helicase activity; molecular_function GO:0004222; metalloendopeptidase activity; molecular_function GO:0006310; DNA recombination; biological_process GO:0016021; integral to membrane; cellular_component GO:0008270; zinc ion binding; molecular_function GO:0006281; DNA re…	{XM_009417873.2; PREDICTED: Musa acuminata subsp. malaccensis ATP-dependent zinc metalloprotease FTSH 8, mitochondrial (LOC103996847), mRNA}	{PF07728:AAA domain (dynein-related subfamily) PF01434:Peptidase family M41 PF05496:Holliday junction DNA helicase ruvB N-terminus PF06068:TIP49 C-terminus PF07724:AAA domain (Cdc48 subfamily) PF01695:IstB-like ATP binding protein PF00004:ATPase family associated with various cellular activities (AAA) PF06480:FtsH Extracellular}
transcript_HQ_AA_transcript11373/f2p0/3227	{BAK00300.1; predicted protein [Hordeum vulgare subsp. vulgare]}	{sp|O14130|YF54_SCHPO; Uncharacterized transcriptional regulatory protein C3C7.04 OS=Schizosaccharomyces pombe (strain 972 / ATCC 24843) GN=SPAC3C7.04 PE=3 SV=1}	{NA}	{NA}	{GO:0006355; regulation of transcription, DNA-dependent; biological_process GO:0003677; DNA binding; molecular_function GO:0006351; transcription, DNA-dependent; biological_process GO:0000981; sequence-specific DNA binding RNA polymerase II transcription factor activity; molecular_function GO:0005634; nucleus; cellular_component GO:0008270; zinc ion binding; molecular_function}	{NA}	{PF04082:Fungal specific transcription factor domain PF00172:Fungal Zn(2)-Cys(6) binuclear cluster domain}
transcript_HQ_AA_transcript11374/f4p0/3217	{XP_010254244.1; PREDICTED: transcriptional corepressor LEUNIG-like isoform X3 [Nelumbo nucifera]}	{sp|Q9FUY2|LEUNG_ARATH; Transcriptional corepressor LEUNIG OS=Arabidopsis thaliana GN=LUG PE=1 SV=2}	{nnu:104595274; - - - - -}	{At4g32551; KOG0266 WD40 repeat-containing protein R General function prediction only ;}	{GO:0005215; NA GO:0005219; ryanodine-sensitive calcium-release channel activity; molecular_function GO:0009401; phosphoenolpyruvate-dependent sugar phosphotransferase system; biological_process GO:0006270; DNA-dependent DNA replication initiation; biological_process GO:0015991; ATP hydrolysis coupled proton transport; biological_process GO:0005856; cytoskeleton; cellular_component GO:0046658; an…	{BT113974.1; Picea glauca clone GQ03505_L12 mRNA sequence}	{PF01496:V-type ATPase 116kDa subunit family PF06459:Ryanodine Receptor TM 4-6 PF03522:Solute carrier family 12 PF01080:Presenilin PF02724:CDC45-like protein PF03612:Sorbitol phosphotransferase enzyme II N-terminus PF05558:DREPP plasma membrane polypeptide PF15748:Centriole, cilia and spindle-associated PF08513:LisH}
transcript_HQ_AA_transcript11379/f2p0/3231	{XP_016183966.1; PREDICTED: AMP deaminase isoform X1 [Arachis ipaensis]}	{sp|O80452|AMPD_ARATH; AMP deaminase OS=Arabidopsis thaliana GN=AMPD PE=1 SV=2}	{aip:107625773; K01490 AMPD AMP deaminase 3.5.4.6 ko00230; Metabolism; Nucleotide metabolism; Purine metabolism}	{At2g38280; KOG1096 Adenosine monophosphate deaminase F Nucleotide transport and metabolism ;}	{GO:0019239; deaminase activity; molecular_function}	{XM_009386647.2; PREDICTED: Musa acuminata subsp. malaccensis AMP deaminase-like (LOC103972344), transcript variant X2, mRNA}	{PF00962:Adenosine/AMP deaminase}
transcript_HQ_AA_transcript11380/f2p0/3233	{XP_010240890.1; PREDICTED: transducin beta-like protein 3 [Nelumbo nucifera]}	{sp|Q2KJJ5|TBL3_BOVIN; Transducin beta-like protein 3 OS=Bos taurus GN=TBL3 PE=2 SV=1}	{egu:105038586; K14555 UTP13, TBL3 U3 small nucleolar RNA-associated protein 13 - ko03008; Genetic Information Processing; Translation; Ribosome biogenesis in eukaryotes}	{At5g16750; KOG0319 WD40-repeat-containing subunit of the 18S rRNA processing complex A RNA processing and modification ;}	{GO:0005515; protein binding; molecular_function GO:0055114; oxidation-reduction process; biological_process GO:0005515; protein binding; molecular_function GO:0006364; rRNA processing; biological_process GO:0032040; small-subunit processome; cellular_component GO:0006355; regulation of transcription, DNA-dependent; biological_process GO:0008121; ubiquinol-cytochrome-c reductase activity; molecul…	{BT117252.1; Picea glauca clone GQ03815_O21 mRNA sequence}	{PF00400:WD domain, G-beta repeat PF09384:UTP15 C terminal PF10399:Ubiquitinol-cytochrome C reductase Fe-S subunit TAT signal PF08625:Utp13 specific WD40 associated domain PF00400:WD domain, G-beta repeat PF03355:Viral Trans-Activator Protein }
transcript_HQ_AA_transcript11385/f9p0/3145	{CDP16532.1; unnamed protein product [Coffea canephora]}	{sp|P31540|HSP98_NEUCR; Heat shock protein hsp98 OS=Neurospora crassa (strain ATCC 24698 / 74-OR23-1A / CBS 708.71 / DSM 1257 / FGSC 987) GN=hsp98 PE=1 SV=2}	{gsl:Gasu_03700; K03695 clpB ATP-dependent Clp protease ATP-binding subunit ClpB - ko04213; Organismal Systems; Aging; Longevity regulating pathway - multiple species}	{SPBC16D10.08c; KOG1051 Chaperone HSP104 and related ATP-dependent Clp proteases O Posttranslational modification, protein turnover, chaperones ;}	{GO:0006810; transport; biological_process GO:0030474; spindle pole body duplication; biological_process GO:0003723; RNA binding; molecular_function GO:0006355; regulation of transcription, DNA-dependent; biological_process GO:0098519; NA GO:0003724; RNA helicase activity; molecular_function GO:0033179; proton-transporting V-type ATPase, V0 domain; cellular_component GO:0007264; small GTPase medi…	{NA}	{PF04111:Autophagy protein Apg6 PF00437:Type II/IV secretion system protein PF02861:Clp amino terminal domain, pathogenicity island component PF00004:ATPase family associated with various cellular activities (AAA) PF00910:RNA helicase PF00005:ABC transporter PF01496:V-type ATPase 116kDa subunit family PF07726:ATPase family associated with various cellular activities (AAA) PF07728:AAA domain (dyne…
transcript_HQ_AA_transcript11389/f2p0/3267	{OAE18652.1; hypothetical protein AXG93_3810s1230 [Marchantia polymorpha subsp. polymorpha]}	{sp|Q0J235|ROLL9_ORYSJ; Probable transcription factor RL9 OS=Oryza sativa subsp. japonica GN=RL9 PE=2 SV=2}	{rcu:8258728; - - - - -}	{NA}	{NA}	{XM_006434826.1; Citrus clementina hypothetical protein (CICLE_v10001679mg) mRNA, complete cds}	{NA}
transcript_HQ_AA_transcript1139/f3p0/5588	{XP_010920353.1; PREDICTED: UDP-glucose:glycoprotein glucosyltransferase [Elaeis guineensis]}	{sp|Q0WL80|UGGG_ARATH; UDP-glucose:glycoprotein glucosyltransferase OS=Arabidopsis thaliana GN=UGGT PE=1 SV=1}	{egu:105044225; K11718 HUGT UDP-glucose:glycoprotein glucosyltransferase 2.4.1.- ko04141; Genetic Information Processing; Folding, sorting and degradation; Protein processing in endoplasmic reticulum}	{At1g71220; KOG1879 UDP-glucose:glycoprotein glucosyltransferase G Carbohydrate transport and metabolism ;}	{GO:0006486; protein glycosylation; biological_process GO:0003980; UDP-glucose:glycoprotein glucosyltransferase activity; molecular_function GO:0016757; transferase activity, transferring glycosyl groups; molecular_function}	{BT107570.1; Picea glauca clone GQ03109_H19 mRNA sequence}	{PF06427:UDP-glucose:Glycoprotein Glucosyltransferase PF01501:Glycosyl transferase family 8}
transcript_HQ_AA_transcript11394/f2p0/3221	{XP_006842554.1; PREDICTED: receptor-like protein kinase FERONIA [Amborella trichopoda]}	{sp|Q9SCZ4|FERON_ARATH; Receptor-like protein kinase FERONIA OS=Arabidopsis thaliana GN=FER PE=1 SV=1}	{egu:105044846; - - - - -}	{At3g51550; KOG1187 Serine/threonine protein kinase T Signal transduction mechanisms ;}	{GO:0005524; ATP binding; molecular_function GO:0004672; protein kinase activity; molecular_function GO:0006468; protein phosphorylation; biological_process}	{BT115343.1; Picea glauca clone GQ03614_K13 mRNA sequence}	{PF00069:Protein kinase domain PF07714:Protein tyrosine kinase}
transcript_HQ_AA_transcript114/f3p0/7526	{ERM96276.1; hypothetical protein AMTR_s00001p00163820 [Amborella trichopoda]}	{sp|Q02099|RAD3_SCHPO; Protein kinase rad3 OS=Schizosaccharomyces pombe (strain 972 / ATCC 24843) GN=rad3 PE=1 SV=2}	{smo:SELMODRAFT_110199; K06640 ATR serine/threonine-protein kinase ATR 2.7.11.1 ko03460; Genetic Information Processing; Replication and repair; Fanconi anemia pathway | ko04110; Cellular Processes; Cell growth and death; Cell cycle | ko04214; Cellular Processes; Cell growth and death; Apoptosis - fly | ko04115; Cellular Processes; Cell growth and death; p53 signaling pathway | ko05166; Human Dis…	{SPBC216.05; KOG0890 Protein kinase of the PI-3 kinase family involved in mitotic growth, DNA repair and meiotic recombination TBLD Signal transduction mechanisms ; Chromatin structure and dynamics ; Replication, recombination and repair ; Cell cycle control, cell division, chromosome partitioning ;}	{GO:0005515; protein binding; molecular_function GO:0004674; protein serine/threonine kinase activity; molecular_function GO:0016301; kinase activity; molecular_function}	{NA}	{PF08064:UME (NUC010) domain PF00454:Phosphatidylinositol 3- and 4-kinase PF02259:FAT domain PF13176:Tetratricopeptide repeat PF02260:FATC domain}
transcript_HQ_AA_transcript11403/f3p0/3239	{OAE29151.1; hypothetical protein AXG93_1862s1080 [Marchantia polymorpha subsp. polymorpha]}	{sp|Q8GZN1|NPG1_ARATH; Protein NPG1 OS=Arabidopsis thaliana GN=NPG1 PE=1 SV=1}	{nnu:104608456; - - - - -}	{At1g27460; KOG4162 Predicted calmodulin-binding protein T Signal transduction mechanisms ;}	{GO:0005515; protein binding; molecular_function GO:0042802; identical protein binding; molecular_function}	{NA}	{PF00515:Tetratricopeptide repeat PF13414:TPR repeat PF13181:Tetratricopeptide repeat PF07721:Tetratricopeptide repeat PF13176:Tetratricopeptide repeat PF13374:Tetratricopeptide repeat PF13371:Tetratricopeptide repeat}
transcript_HQ_AA_transcript11406/f4p0/3201	{XP_006842069.1; PREDICTED: phospholipase D alpha 1 [Amborella trichopoda]}	{sp|Q43007|PLDA1_ORYSJ; Phospholipase D alpha 1 OS=Oryza sativa subsp. japonica GN=PLD1 PE=1 SV=2}	{osa:4327647; K01115 PLD1_2 phospholipase D1/2 3.1.4.4 ko00564; Metabolism; Lipid metabolism; Glycerophospholipid metabolism | ko00565; Metabolism; Lipid metabolism; Ether lipid metabolism | ko04014; Environmental Information Processing; Signal transduction; Ras signaling pathway | ko04072; Environmental Information Processing; Signal transduction; Phospholipase D signaling pathway | ko04071; Env…	{At3g15730; KOG1329 Phospholipase D1 I Lipid transport and metabolism ;}	{GO:0003824; NA GO:0005515; protein binding; molecular_function}	{EF085213.1; Picea sitchensis clone WS0295_A20 unknown mRNA}	{PF00168:C2 domain PF00614:Phospholipase D Active site motif}
transcript_HQ_AA_transcript1141/f2p0/5600	{XP_010655213.1; PREDICTED: histone acetyltransferase HAC1 [Vitis vinifera]}	{sp|Q9C5X9|HAC1_ARATH; Histone acetyltransferase HAC1 OS=Arabidopsis thaliana GN=HAC1 PE=1 SV=2}	{nnu:104599204; K04498 EP300, CREBBP, KAT3 E1A/CREB-binding protein 2.3.1.48 ko04310; Environmental Information Processing; Signal transduction; Wnt signaling pathway | ko04330; Environmental Information Processing; Signal transduction; Notch signaling pathway | ko04350; Environmental Information Processing; Signal transduction; TGF-beta signaling pathway | ko04630; Environmental Information Proc…	{At1g79000; KOG1778 CREB binding protein/P300 and related TAZ Zn-finger proteins K Transcription ;}	{GO:0004402; histone acetyltransferase activity; molecular_function GO:0003712; transcription cofactor activity; molecular_function GO:0006355; regulation of transcription, DNA-dependent; biological_process GO:0016573; histone acetylation; biological_process GO:0005515; protein binding; molecular_function GO:0005634; nucleus; cellular_component GO:0008270; zinc ion binding; molecular_function}	{XM_010261644.2; PREDICTED: Nelumbo nucifera histone acetyltransferase HAC1-like (LOC104599204), mRNA}	{PF00628:PHD-finger PF02135:TAZ zinc finger PF08214:Histone acetylation protein}
transcript_HQ_AA_transcript11412/f2p0/3221	{ERN13685.1; hypothetical protein AMTR_s00049p00134910 [Amborella trichopoda]}	{sp|O65001|TE1_MAIZE; Protein terminal ear1 OS=Zea mays GN=TE1 PE=2 SV=1}	{atr:18441931; - - - - -}	{At3g26120; KOG4660 Protein Mei2, essential for commitment to meiosis, and related proteins D Cell cycle control, cell division, chromosome partitioning ;}	{GO:0003676; nucleic acid binding; molecular_function}	{NA}	{PF00076:RNA recognition motif. (a.k.a. RRM, RBD, or RNP domain)}
transcript_HQ_AA_transcript11414/f2p0/3238	{XP_010251848.1; PREDICTED: cell division control protein 48 homolog C [Nelumbo nucifera]}	{sp|Q9SS94|CD48C_ARATH; Cell division control protein 48 homolog C OS=Arabidopsis thaliana GN=CDC48C PE=2 SV=2}	{nnu:104593610; K14571 RIX7, NVL ribosome biogenesis ATPase - ko03008; Genetic Information Processing; Translation; Ribosome biogenesis in eukaryotes}	{At3g01610; KOG0733 Nuclear AAA ATPase (VCP subfamily) O Posttranslational modification, protein turnover, chaperones ;}	{GO:0016301; kinase activity; molecular_function GO:0002949; NA GO:0006310; DNA recombination; biological_process GO:0008134; transcription factor binding; molecular_function GO:0006576; cellular biogenic amine metabolic process; biological_process GO:0016887; ATPase activity; molecular_function GO:0043531; ADP binding; molecular_function GO:0005524; ATP binding; molecular_function GO:0003678; DN…	{XM_007211284.1; Prunus persica hypothetical protein (PRUPE_ppa001430mg) mRNA, complete cds}	{PF14532:Sigma-54 interaction domain PF01695:IstB-like ATP binding protein PF06068:TIP49 C-terminus PF05496:Holliday junction DNA helicase ruvB N-terminus PF00005:ABC transporter PF00910:RNA helicase PF06414:Zeta toxin PF00004:ATPase family associated with various cellular activities (AAA) PF01443:Viral (Superfamily 1) RNA helicase PF10662:Ethanolamine utilisation - propanediol utilisation PF0105…
transcript_HQ_AA_transcript11415/f2p0/3225	{JAT58720.1; Aminopeptidase 2, partial [Anthurium amnicola]}	{sp|Q59KZ1|APE2_CANAL; Aminopeptidase 2 OS=Candida albicans (strain SC5314 / ATCC MYA-2876) GN=APE2 PE=1 SV=2}	{gsl:Gasu_26180; K08776 NPEPPS puromycin-sensitive aminopeptidase 3.4.11.- -}	{YKL157w; KOG1046 Puromycin-sensitive aminopeptidase and related aminopeptidases EO Amino acid transport and metabolism ; Posttranslational modification, protein turnover, chaperones ;}	{GO:0008270; zinc ion binding; molecular_function GO:0008237; metallopeptidase activity; molecular_function}	{XM_003059574.1; Micromonas pusilla CCMP1545 predicted protein, mRNA}	{PF01433:Peptidase family M1}
transcript_HQ_AA_transcript11417/f2p0/3225	{ERN15547.1; hypothetical protein AMTR_s00048p00122750 [Amborella trichopoda]}	{sp|Q8RY59|RCD1_ARATH; Inactive poly [ADP-ribose] polymerase RCD1 OS=Arabidopsis thaliana GN=RCD1 PE=1 SV=1}	{atr:18443837; - - - - -}	{NA}	{GO:0003950; NAD+ ADP-ribosyltransferase activity; molecular_function}	{NA}	{PF00644:Poly(ADP-ribose) polymerase catalytic domain}
transcript_HQ_AA_transcript11418/f2p0/3233	{OMO72849.1; hypothetical protein CCACVL1_17557 [Corchorus capsularis]}	{sp|P43101|NIA_CICIN; Nitrate reductase [NADH] OS=Cichorium intybus GN=NIA PE=2 SV=1}	{gra:105786148; K10534 NR nitrate reductase (NAD(P)H) [EC:1.7.1.1 1.7.1.2 1.7.1.3] 1.7.1.1,1.7.1.2,1.7.1.3 ko00910; Metabolism; Energy metabolism; Nitrogen metabolism}	{At1g77760_1; KOG0535 Sulfite oxidase, molybdopterin-binding component C Energy production and conversion ;}	{GO:0030151; molybdenum ion binding; molecular_function GO:0016491; oxidoreductase activity; molecular_function GO:0042128; nitrate assimilation; biological_process GO:0055114; oxidation-reduction process; biological_process}	{XM_002454580.1; Sorghum bicolor hypothetical protein, mRNA}	{PF00175:Oxidoreductase NAD-binding domain PF00174:Oxidoreductase molybdopterin binding domain PF03404:Mo-co oxidoreductase dimerisation domain PF08030:Ferric reductase NAD binding domain}
transcript_HQ_AA_transcript11423/f2p0/3225	{ACN39915.1; unknown [Picea sitchensis]}	{sp|Q8VYW1|PAPS4_ARATH; Nuclear poly(A) polymerase 4 OS=Arabidopsis thaliana GN=PAPS4 PE=1 SV=1}	{nnu:104592040; - - - - -}	{At4g32850; KOG2245 Poly(A) polymerase and related nucleotidyltransferases A RNA processing and modification ;}	{GO:0004652; polynucleotide adenylyltransferase activity; molecular_function GO:0043631; RNA polyadenylation; biological_process GO:0016779; nucleotidyltransferase activity; molecular_function GO:0003723; RNA binding; molecular_function}	{BT070400.1; Picea sitchensis clone WS02727_B22 unknown mRNA}	{PF04928:Poly(A) polymerase central domain PF04926:Poly(A) polymerase predicted RNA binding domain PF01909:Nucleotidyltransferase domain}
transcript_HQ_AA_transcript11425/f3p0/3172	{XP_006852644.1; PREDICTED: phosphatidylinositol 4-kinase gamma 4 [Amborella trichopoda]}	{sp|Q9FNF8|P4KG3_ARATH; Phosphatidylinositol 4-kinase gamma 3 OS=Arabidopsis thaliana GN=PI4KG3 PE=2 SV=1}	{atr:18442363; - - - - -}	{At2g46500_2; KOG2381 Phosphatidylinositol 4-kinase T Signal transduction mechanisms ;}	{GO:0016301; kinase activity; molecular_function GO:0005515; protein binding; molecular_function}	{BT117001.1; Picea glauca clone GQ03810_P20 mRNA sequence}	{PF00454:Phosphatidylinositol 3- and 4-kinase PF00240:Ubiquitin family PF14560:Ubiquitin-like domain}
transcript_HQ_AA_transcript11426/f2p0/3215	{XP_001766808.1; predicted protein [Physcomitrella patens]}	{sp|Q54BM5|BBP_DICDI; Branchpoint-bridging protein OS=Dictyostelium discoideum GN=sf1 PE=3 SV=1}	{obr:102719712; K13095 SF1 splicing factor 1 - -}	{At5g51300; KOG0119 Splicing factor 1/branch point binding protein (RRM superfamily) A RNA processing and modification ;}	{GO:0003723; RNA binding; molecular_function GO:0003676; nucleic acid binding; molecular_function}	{NA}	{PF00013:KH domain PF00076:RNA recognition motif. (a.k.a. RRM, RBD, or RNP domain)}
transcript_HQ_AA_transcript11427/f2p0/3214	{GAQ78667.1; hypothetical protein KFL_000170130 [Klebsormidium flaccidum]}	{sp|D3YWJ0|SLIP_MOUSE; Nuclear GTPase SLIP-GC OS=Mus musculus GN=Nuggc PE=3 SV=1}	{cvr:CHLNCDRAFT_137642; - - - - -}	{NA}	{GO:0003723; RNA binding; molecular_function GO:0070206; protein trimerization; biological_process GO:0042803; protein homodimerization activity; molecular_function GO:0070840; dynein complex binding; molecular_function GO:0008134; transcription factor binding; molecular_function GO:0003924; GTPase activity; molecular_function GO:0006364; rRNA processing; biological_process GO:0016887; ATPase act…	{NA}	{PF08477:Ras of Complex, Roc, domain of DAPkinase PF10150:Ribonuclease E/G family PF00005:ABC transporter PF10473:Leucine-rich repeats of kinetochore protein Cenp-F/LEK1 PF03652:Holliday junction resolvase PF02841:Guanylate-binding protein, C-terminal domain PF16331:TolA binding protein trimerisation PF01926:50S ribosome-binding GTPase PF03193:Protein of unknown function, DUF258}
transcript_HQ_AA_transcript1143/f10p0/5569	{XP_017619616.1; PREDICTED: DNA topoisomerase 2 isoform X1 [Gossypium arboreum]}	{sp|Q9Y8G8|TOP2_PENCH; DNA topoisomerase 2 OS=Penicillium chrysogenum GN=TOP2 PE=3 SV=1}	{osa:4330426; K03164 TOP2 DNA topoisomerase II 5.99.1.3 ko01524; Human Diseases; Drug resistance: Antineoplastic; Platinum drug resistance}	{SPBC1A4.03c; KOG0355 DNA topoisomerase type II B Chromatin structure and dynamics ;}	{GO:0005524; ATP binding; molecular_function GO:0006265; DNA topological change; biological_process GO:0003677; DNA binding; molecular_function GO:0003918; DNA topoisomerase (ATP-hydrolyzing) activity; molecular_function}	{XM_011401794.1; Auxenochlorella protothecoides DNA topoisomerase 2 partial mRNA}	{PF00204:DNA gyrase B PF00521:DNA gyrase/topoisomerase IV, subunit A}
transcript_HQ_AA_transcript11430/f4p0/3183	{XP_020085771.1; uncharacterized protein LOC109708438 isoform X1 [Ananas comosus]}	{NA}	{egu:105044999; - - - - -}	{NA}	{NA}	{BT124373.1; Picea sitchensis clone WS0473_H16 unknown mRNA}	{NA}
transcript_HQ_AA_transcript11431/f2p0/3196	{ACN40838.1; unknown [Picea sitchensis]}	{sp|P35683|IF4A1_ORYSJ; Eukaryotic initiation factor 4A-1 OS=Oryza sativa subsp. japonica GN=Os06g0701100 PE=2 SV=2}	{ppp:PHYPADRAFT_233331; K03257 EIF4A translation initiation factor 4A - ko03013; Genetic Information Processing; Translation; RNA transport}	{At3g13920; KOG0327 Translation initiation factor 4F, helicase subunit (eIF-4A) and related helicases J Translation, ribosomal structure and biogenesis ;}	{GO:0016787; hydrolase activity; molecular_function GO:0008026; ATP-dependent helicase activity; molecular_function GO:0003676; nucleic acid binding; molecular_function GO:0019079; viral genome replication; biological_process GO:0005524; ATP binding; molecular_function GO:0003677; DNA binding; molecular_function}	{BT070859.1; Picea sitchensis clone WS02756_O07 unknown mRNA}	{PF00270:DEAD/DEAH box helicase PF07652:Flavivirus DEAD domain PF04851:Type III restriction enzyme, res subunit}
transcript_HQ_AA_transcript11432/f2p0/3218	{ABK22288.1; unknown [Picea sitchensis]}	{sp|Q8GT39|PROF_PRUPE; Profilin OS=Prunus persica PE=1 SV=1}	{cit:102628130; K05759 PFN profilin - ko04015; Environmental Information Processing; Signal transduction; Rap1 signaling pathway | ko04013; Environmental Information Processing; Signal transduction; MAPK signaling pathway - fly | ko04810; Cellular Processes; Cell motility; Regulation of actin cytoskeleton | ko05132; Human Diseases; Infectious diseases: Bacterial; Salmonella infection | ko05131; H…	{At5g56600; KOG1755 Profilin Z Cytoskeleton ;}	{NA}	{EF678166.1; Picea sitchensis clone WS02824_D18 unknown mRNA}	{NA}
transcript_HQ_AA_transcript11433/f4p0/3216	{XP_006840561.1; PREDICTED: kinesin-13A [Amborella trichopoda]}	{sp|Q940B8|KN13A_ARATH; Kinesin-like protein KIN-13A OS=Arabidopsis thaliana GN=KIN13A PE=1 SV=1}	{nnu:104598962; K10393 KIF2_24, MCAK kinesin family member 2/24 - -}	{At3g16630; KOG0246 Kinesin-like protein Z Cytoskeleton ;}	{GO:0008017; microtubule binding; molecular_function GO:0003677; DNA binding; molecular_function GO:0015074; DNA integration; biological_process GO:0007018; microtubule-based movement; biological_process GO:0005524; ATP binding; molecular_function GO:0003777; microtubule motor activity; molecular_function}	{BT123886.1; Picea sitchensis clone WS04718_G02 unknown mRNA}	{PF16796:Microtubule binding PF00225:Kinesin motor domain PF02899:Phage integrase, N-terminal SAM-like domain}
transcript_HQ_AA_transcript11435/f2p0/3220	{XP_011081144.1; PREDICTED: dynamin-related protein 4C-like [Sesamum indicum]}	{sp|Q9ZP55|DRP4C_ARATH; Dynamin-related protein 4C OS=Arabidopsis thaliana GN=DRP4C PE=2 SV=1}	{egr:104426759; - - - - -}	{At1g60500; KOG0446 Vacuolar sorting protein VPS1, dynamin, and related proteins UR Intracellular trafficking, secretion, and vesicular transport ; General function prediction only ;}	{GO:0005525; GTP binding; molecular_function GO:0003924; GTPase activity; molecular_function}	{NA}	{PF02421:Ferrous iron transport protein B PF02212:Dynamin GTPase effector domain PF01031:Dynamin central region PF01926:50S ribosome-binding GTPase}
transcript_HQ_AA_transcript11436/f2p0/3244	{XP_006378437.1; hypothetical protein POPTR_0010s11700g [Populus trichocarpa]}	{sp|Q9ZU97|VAC14_ARATH; Protein VAC14 homolog OS=Arabidopsis thaliana GN=VAC14 PE=1 SV=2}	{gra:105785632; K15305 VAC14, TAX1BP2 vacuole morphology and inheritance protein 14 - ko05203; Human Diseases; Cancers: Overview; Viral carcinogenesis | ko05166; Human Diseases; Infectious diseases: Viral; HTLV-I infection}	{At2g01690; KOG0212 Uncharacterized conserved protein S Function unknown ;}	{GO:0043248; proteasome assembly; biological_process GO:0005515; protein binding; molecular_function GO:0032947; protein complex scaffold; molecular_function}	{BT115378.1; Picea glauca clone GQ03615_E04 mRNA sequence}	{PF02985:HEAT repeat PF13001:Proteasome stabiliser}
transcript_HQ_AA_transcript11437/f2p0/3246	{ABR16455.1; unknown [Picea sitchensis]}	{sp|F4KFT7|TENAC_ARATH; Bifunctional TH2 protein, mitochondrial OS=Arabidopsis thaliana GN=TH2 PE=1 SV=1}	{atr:18444102; - - - - -}	{NA}	{NA}	{EF676556.1; Picea sitchensis clone WS02742_A22 unknown mRNA}	{NA}
transcript_HQ_AA_transcript11439/f3p0/3237	{GAQ78667.1; hypothetical protein KFL_000170130 [Klebsormidium flaccidum]}	{sp|D3YWJ0|SLIP_MOUSE; Nuclear GTPase SLIP-GC OS=Mus musculus GN=Nuggc PE=3 SV=1}	{cvr:CHLNCDRAFT_137642; - - - - -}	{NA}	{GO:0003924; GTPase activity; molecular_function GO:0006364; rRNA processing; biological_process GO:0005525; GTP binding; molecular_function GO:0016887; ATPase activity; molecular_function GO:0005524; ATP binding; molecular_function GO:0007264; small GTPase mediated signal transduction; biological_process GO:0019901; protein kinase binding; molecular_function}	{NA}	{PF00005:ABC transporter PF08477:Ras of Complex, Roc, domain of DAPkinase PF03652:Holliday junction resolvase PF15898:cGMP-dependent protein kinase interacting domain PF02841:Guanylate-binding protein, C-terminal domain PF01926:50S ribosome-binding GTPase PF03193:Protein of unknown function, DUF258}
transcript_HQ_AA_transcript1144/f5p0/5593	{XP_008456832.1; PREDICTED: uncharacterized protein LOC103496406 isoform X1 [Cucumis melo]}	{sp|Q54BC9|DYRK2_DICDI; Probable serine/threonine-protein kinase dyrk2 OS=Dictyostelium discoideum GN=dyrk2 PE=3 SV=1}	{cmo:103496406; - - - - -}	{At1g73460; KOG0667 Dual-specificity tyrosine-phosphorylation regulated kinase R General function prediction only ;}	{GO:0005524; ATP binding; molecular_function GO:0016020; membrane; cellular_component GO:0016773; phosphotransferase activity, alcohol group as acceptor; molecular_function GO:0004672; protein kinase activity; molecular_function GO:0006468; protein phosphorylation; biological_process}	{BT107395.1; Picea glauca clone GQ03107_A08 mRNA sequence}	{PF07714:Protein tyrosine kinase PF06293:Lipopolysaccharide kinase (Kdo/WaaP) family PF00069:Protein kinase domain}
transcript_HQ_AA_transcript11442/f2p0/3220	{XP_010664563.1; PREDICTED: probable serine/threonine-protein kinase At1g01540 isoform X2 [Vitis vinifera]}	{sp|Q3EDL4|Y1154_ARATH; Probable serine/threonine-protein kinase At1g01540 OS=Arabidopsis thaliana GN=At1g01540 PE=1 SV=2}	{pmum:103320445; - - - - -}	{At1g01540; KOG1187 Serine/threonine protein kinase T Signal transduction mechanisms ;}	{GO:0004672; protein kinase activity; molecular_function GO:0006468; protein phosphorylation; biological_process GO:0005524; ATP binding; molecular_function}	{BT109470.1; Picea glauca clone GQ03208_N17 mRNA sequence}	{PF00069:Protein kinase domain PF07714:Protein tyrosine kinase}
[truncated: 41,609 more rows]

## Sheet: Table S4
Table S4 | GO functional annotation of all genes						Table S4 | KEGG functional annotation of all genes
[truncated: 373 more rows]

[truncated: 8 more sheets: Table S5, Table S6, Table S7, Table S8, Table S9, Table S10, Table S11, Table S12]
